# Supplementary material for: Rh(iii)-catalyzed selective mono- and dual-functionalization/cyclization of 1-aryl-5-aminopyrazoles with iodonium ylides
Source: Royal Society of Chemistry journal article supplement (doi:10.1039/d3cc05266d), 2023-12-05
Supplement: d3cc05266d1.pdf [file d3cc05266d1.pdf]

# Rh(III)-Catalyzed Selective Mono- and Dual Functionalization/Cyclization of 1-aryl-5-aminopyrazoles with Iodonium Ylides

Longkun Chen,<sup>a</sup> Mingshuai Zhang,<sup>a</sup> Meichen Liu,<sup>a</sup> Zhuoyuan Liu,<sup>a</sup> Yuetong Qiu,<sup>a</sup>  
Zhilai Zhang,<sup>a</sup> Fuchao Yu<sup>\*a</sup> and Jiuzhong Huang<sup>\*b</sup>

<sup>a</sup>Faculty of Life Science and Technology, Kunming, University of Science and Technology, Kunming, 650500, P. R. of China. E-mail: [yufc@kust.edu.cn](mailto:yufc@kust.edu.cn); [yufuchao05@126.com](mailto:yufuchao05@126.com);

<sup>b</sup>School of Pharmacy and Key Laboratory of Prevention and Treatment of Cardiovascular and Cerebrovascular Diseases of Ministry of Education, Gannan Medical University, Ganzhou, 341000, P. R. China. E-mail: [huangjz@gmu.edu.cn](mailto:huangjz@gmu.edu.cn);

## Table of Contents

|                                                                                                         |     |
|---------------------------------------------------------------------------------------------------------|-----|
| 1. General information. ....                                                                            | 2   |
| 2. Optimization of reaction conditions. ....                                                            | 3   |
| 3. General procedure. ....                                                                              | 4   |
| 4. Spectroscopic data. ....                                                                             | 9   |
| 5. X-ray Structure and Data <sup>3</sup> of <b>3j</b> (CCDC 2292416) and <b>4r</b> (CCDC 2292417). .... | 34  |
| 6. <sup>1</sup> H NMR and <sup>13</sup> C NMR spectra for spectroscopic data. ....                      | 36  |
| 7. References and notes. ....                                                                           | 149 |

## 1. General information.

All compounds were fully characterized by spectroscopic data. The NMR spectra were recorded on a DRX600 ( $^1\text{H}$ : 600 MHz,  $^{13}\text{C}$ : 150 MHz) and DRX500 ( $^1\text{H}$ : 500 MHz,  $^{13}\text{C}$ : 125 MHz), chemical shifts ( $\delta$ ) are expressed in ppm, and  $J$  values are given in Hz, and deuterated  $\text{CDCl}_3$  and  $\text{DMSO-}d_6$  were used as solvent. The reactions were monitored by thin layer chromatography (TLC) using silica gel GF<sub>254</sub>. The melting points were determined on XT-4A melting point apparatus and are uncorrected. HRMS were performed on an Agilent LC/MS TOF instrument.

All chemicals and solvents were used as received without further purification unless otherwise stated. Column chromatography was performed on silica gel (200–300 mesh).

1-Aryl-5-aminopyrazoles **1** were prepared according to the literature<sup>1</sup>, iodonium ylides **2** were prepared according to the literature<sup>2</sup>. Other reagents were purchased from Energy Chemical and Adamas-beta®.

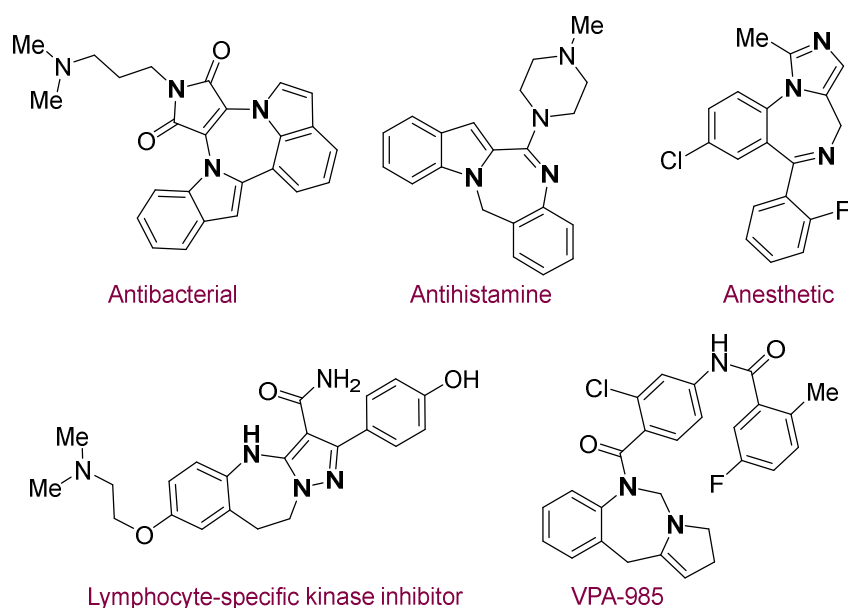

**Figure S1.** Representative bioactive polycyclic molecules.

## 2. Optimization of reaction conditions.

**Table S1.** Optimization of the mono-C-H functionalization/cyclization reaction conditions.<sup>a,b</sup>

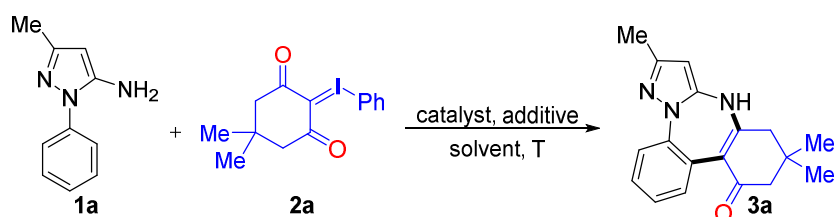

| entry <sup>a</sup> | catalyst                             | additive                        | solvent           | T (°C) | yield (%) |
|--------------------|--------------------------------------|---------------------------------|-------------------|--------|-----------|
| 1                  | [Cp*RhCl <sub>2</sub> ] <sub>2</sub> | AgSbF <sub>6</sub>              | TFE               | 60     | 48        |
| 2                  | [Cp*IrCl <sub>2</sub> ] <sub>2</sub> | AgSbF <sub>6</sub>              | TFE               | 60     | trace     |
| 3                  | RhI <sub>3</sub>                     | AgSbF <sub>6</sub>              | TFE               | 60     | trace     |
| 4                  | [RhCl(cod)] <sub>2</sub>             | AgSbF <sub>6</sub>              | TFE               | 60     | 0         |
| 5                  | [Cp*RhCl <sub>2</sub> ] <sub>2</sub> | -                               | TFE               | 60     | 36        |
| 6                  | [Cp*RhCl <sub>2</sub> ] <sub>2</sub> | AgF                             | TFE               | 60     | 40        |
| 7                  | [Cp*RhCl <sub>2</sub> ] <sub>2</sub> | AgTFA                           | TFE               | 60     | 65        |
| 8                  | [Cp*RhCl <sub>2</sub> ] <sub>2</sub> | AgNO <sub>3</sub>               | TFE               | 60     | 32        |
| 9                  | [Cp*RhCl <sub>2</sub> ] <sub>2</sub> | Ag <sub>2</sub> CO <sub>3</sub> | TFE               | 60     | trace     |
| 10                 | [Cp*RhCl <sub>2</sub> ] <sub>2</sub> | AgOAc                           | TFE               | 60     | 36        |
| 11                 | [Cp*RhCl <sub>2</sub> ] <sub>2</sub> | AgCl                            | TFE               | 60     | 20        |
| 12                 | [Cp*RhCl <sub>2</sub> ] <sub>2</sub> | AgTFA                           | <sup>t</sup> BuOH | 60     | 38        |
| 13                 | [Cp*RhCl <sub>2</sub> ] <sub>2</sub> | AgTFA                           | EtOH              | 60     | 63        |
| 14                 | [Cp*RhCl <sub>2</sub> ] <sub>2</sub> | AgTFA                           | DCE               | 60     | 40        |
| 15                 | [Cp*RhCl <sub>2</sub> ] <sub>2</sub> | AgTFA                           | DMSO              | 60     | 48        |
| 16                 | [Cp*RhCl <sub>2</sub> ] <sub>2</sub> | AgTFA                           | HFIP              | 60     | 76        |
| 17 <sup>c</sup>    | [Cp*RhCl <sub>2</sub> ] <sub>2</sub> | AgTFA                           | HFIP              | 60     | 64        |
| 18 <sup>d</sup>    | [Cp*RhCl <sub>2</sub> ] <sub>2</sub> | AgTFA                           | HFIP              | 60     | 76        |
| 19 <sup>e</sup>    | [Cp*RhCl <sub>2</sub> ] <sub>2</sub> | AgTFA                           | HFIP              | 60     | 75        |
| 20 <sup>f</sup>    | [Cp*RhCl <sub>2</sub> ] <sub>2</sub> | AgTFA                           | HFIP              | 60     | 70        |
| 21                 | [Cp*RhCl <sub>2</sub> ] <sub>2</sub> | AgTFA                           | HFIP              | 40     | 66        |
| 22                 | [Cp*RhCl <sub>2</sub> ] <sub>2</sub> | AgTFA                           | HFIP              | 80     | 89        |
| 23                 | [Cp*RhCl <sub>2</sub> ] <sub>2</sub> | AgTFA                           | HFIP              | 100    | 78        |
| 24 <sup>g</sup>    | [Cp*RhCl <sub>2</sub> ] <sub>2</sub> | AgTFA                           | HFIP              | 80     | 63        |
| 25 <sup>h</sup>    | [Cp*RhCl <sub>2</sub> ] <sub>2</sub> | AgTFA                           | HFIP              | 80     | 89        |

<sup>a</sup>**1a** (0.3 mmol), **2a** (0.36 mmol, 1.2 equiv), catalyst (2.5 mol%), additive (0.5 equiv), solvent (1.5 mL), at 80 °C for 12 h under air atmosphere; <sup>b</sup>isolated yield; <sup>c</sup>**2a** (1.0 equiv); <sup>d</sup>**2a** (1.5 equiv); <sup>e</sup>O<sub>2</sub> atmosphere; <sup>f</sup>N<sub>2</sub> atmosphere; <sup>g</sup>Catalyst (1.5 mol%); <sup>h</sup>Catalyst (3.5 mol%).

### 3. General procedure.

#### 3.1 Synthesis of benzo[*f*]pyrazolo[1,5-*a*][1,3]diazepines **3**.

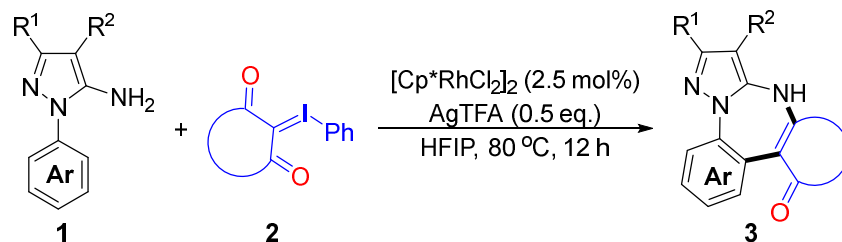

1-Aryl-5-aminopyrazoles **1** (0.3 mmol), iodonium ylides **2** (0.36 mmol),  $[\text{Cp}^*\text{RhCl}_2]_2$  (2.5 mol%), AgTFA (0.15 mmol) and HFIP (1.5 mL) were charged into a 10 mL Ace Glass pressure tubes, and the mixture was stirred at 80 °C for 12.0 h until **1** were completely consumed. The mixture was cooled to room temperature, and then EtOAc (15 mL  $\times$  2) were added. The organic phase was washed with water (10 mL), dried over  $\text{Na}_2\text{SO}_4$ , concentrated and purified by flash column chromatography to afford **3**.

#### 3.2 Synthesis of 4-substituted benzo[*f*]pyrazolo[1,5-*a*][1,3]diazepines **4**.

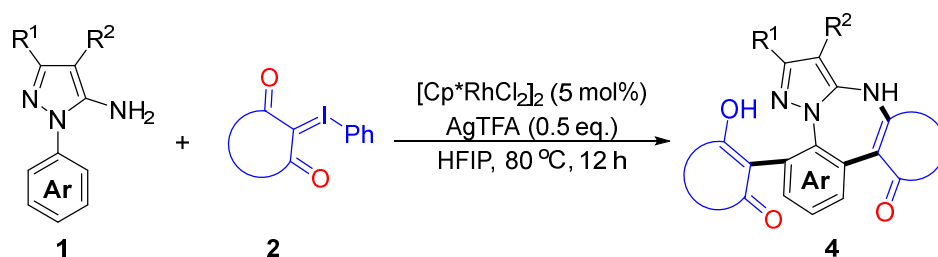

1-Aryl-5-aminopyrazoles **1** (0.4 mmol), iodonium ylides **2** (1.2 mmol),  $[\text{Cp}^*\text{RhCl}_2]_2$  (5 mol%), AgTFA (0.2 mmol) and HFIP (2 mL) were charged into a 10 mL Ace Glass pressure tubes, and the mixture was stirred at 80 °C for 12.0 h until **1** were completely consumed. The mixture was cooled to room temperature, and then EtOAc (15 mL  $\times$  2) were added. The organic phase was washed with water (10 mL), dried over  $\text{Na}_2\text{SO}_4$ , concentrated and purified by flash column chromatography to afford **4**.

#### 3.3 Gram-scale synthesis of benzo[*f*]pyrazolo[1,5-*a*][1,3]diazepine **4a**.

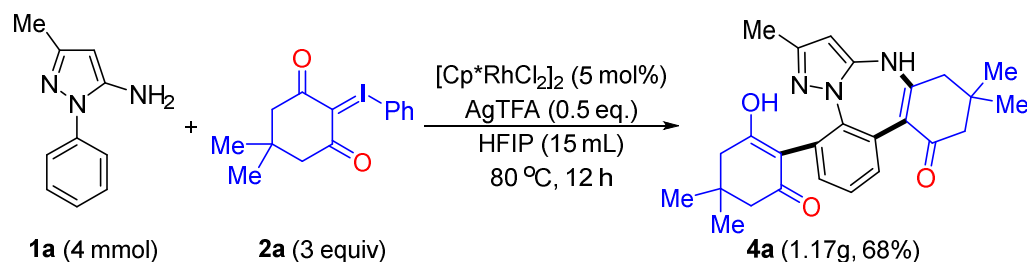

1-Aryl-5-aminopyrazole **1a** (4 mmol), iodonium ylide **2a** (12 mmol),  $[\text{Cp}^*\text{RhCl}_2]_2$  (5 mol%), AgTFA (2 mmol) and HFIP (15 mL) were charged into a 100 mL Ace Glass

pressure tubes, and the mixture was stirred at 80 °C for 12.0 h until **1** were completely consumed. The mixture was cooled to room temperature, and then EtOAc (30 mL × 2) were added. The organic phase was washed with water (20 mL), dried over Na<sub>2</sub>SO<sub>4</sub>, concentrated and purified by flash column chromatography to afford **4a** in 68% yield (1.17 g).

### 3.4 Further transformation of benzo[*f*]pyrazolo[1,5-*a*][1,3]diazepine **3a**.

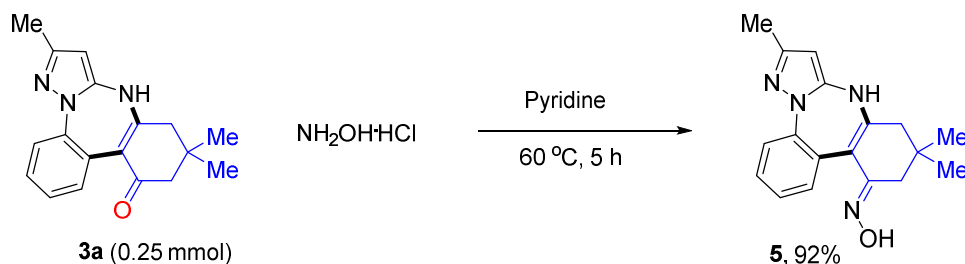

**3a** (0.25 mmol), hydrohydrate hydrochloride (1.5 mmol), and pyridine (2 mL) were charged into a 10 mL Ace Glass pressure tubes, and the mixture was stirred at 60 °C for 5.0 h until **3a** were completely consumed. The mixture was cooled to room temperature, and then EtOAc (15 mL × 2) were added. The organic phase was washed with water (10 mL), dried over Na<sub>2</sub>SO<sub>4</sub>, concentrated and purified by flash column chromatography to afford **5** in 92% yield.

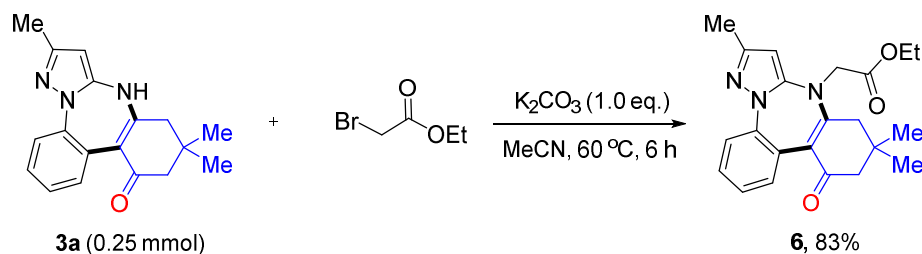

**3a** (0.25 mmol), ethyl bromoacetate (0.37 mmol), K<sub>2</sub>CO<sub>3</sub> (0.25 mmol) and MeCN (2 mL) were charged into a 10 mL Ace Glass pressure tubes, and the mixture was stirred at 60 °C for 6.0 h until **3a** were completely consumed. The mixture was cooled to room temperature, and then EtOAc (15 mL × 2) were added. The organic phase was washed with water (10 mL), dried over Na<sub>2</sub>SO<sub>4</sub>, concentrated and purified by flash column chromatography to afford **6** in 83% yield.

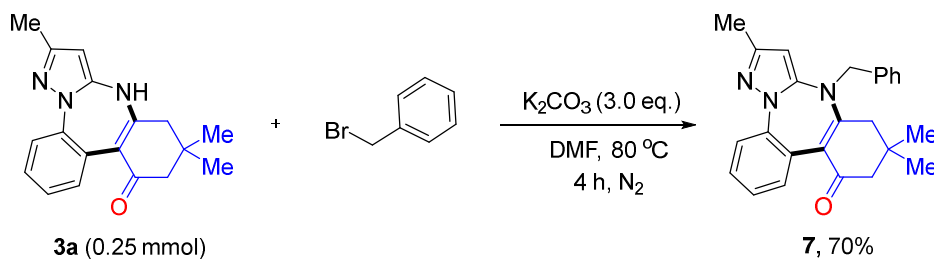

**3a** (0.25 mmol), benzyl bromide (0.37 mmol), K<sub>2</sub>CO<sub>3</sub> (0.75 mmol) and DMF (2 mL) under nitrogen atmosphere were charged into a 10 mL Ace Glass pressure tubes, and the mixture was stirred at 80 °C for 4.0 h until **3a** were completely consumed. The mixture was cooled to room temperature, and then EtOAc (15 mL × 2) were added. The organic phase was washed with water (10 mL), dried over Na<sub>2</sub>SO<sub>4</sub>, concentrated and purified by flash column chromatography to afford **7** in 70% yield.

### 3.5 Control experiment.

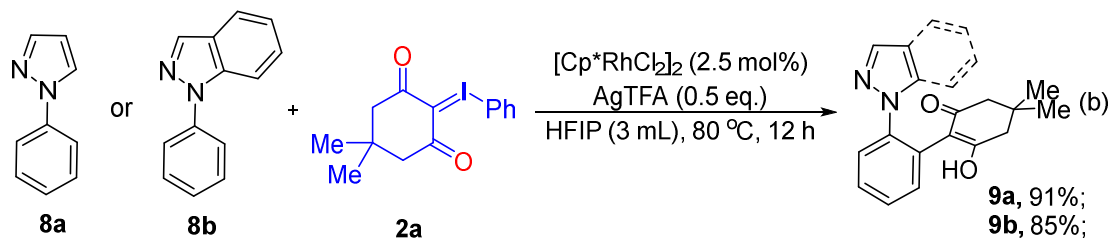

1-Phenylpyrazole **8a** or 1-phenylindazole **8b** (0.5 mmol), iodonium ylides **2** (0.6 mmol), [Cp<sup>\*</sup>RhCl<sub>2</sub>]<sub>2</sub> (2.5 mol%), AgTFA (0.25 mmol) and HFIP (3 mL) were charged into a 10 mL Ace Glass pressure tubes, and the mixture was stirred at 80 °C for 12.0 h until **8a** or **8b** were completely consumed. The mixture was cooled to room temperature, and then EtOAc (15 mL × 2) were added. The organic phase was washed with water (10 mL), dried over Na<sub>2</sub>SO<sub>4</sub>, concentrated and purified by flash column chromatography to afford **9**.

### 3.6 H/D Exchange experiment.

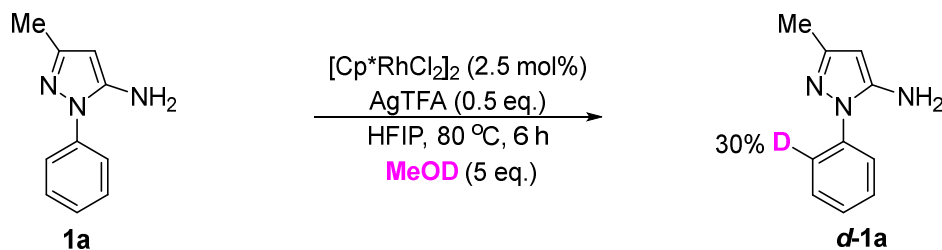

**1a** (0.3 mmol), [Cp<sup>\*</sup>RuCl<sub>2</sub>]<sub>2</sub> (2.5 mol%), AgTFA (0.15 mmol), HFIP (1.5 mL) and MeOD (1.5 mmol) were charged into a 10 mL Ace Glass pressure tubes, and the mixture was stirred at 80 °C for 6.0 h. The mixture was cooled to room temperature, and then EtOAc (15 mL × 2) were added. The organic phase was washed with water (10 mL), dried over Na<sub>2</sub>SO<sub>4</sub>, concentrated and purified by flash column chromatography to afford **d-1a**.

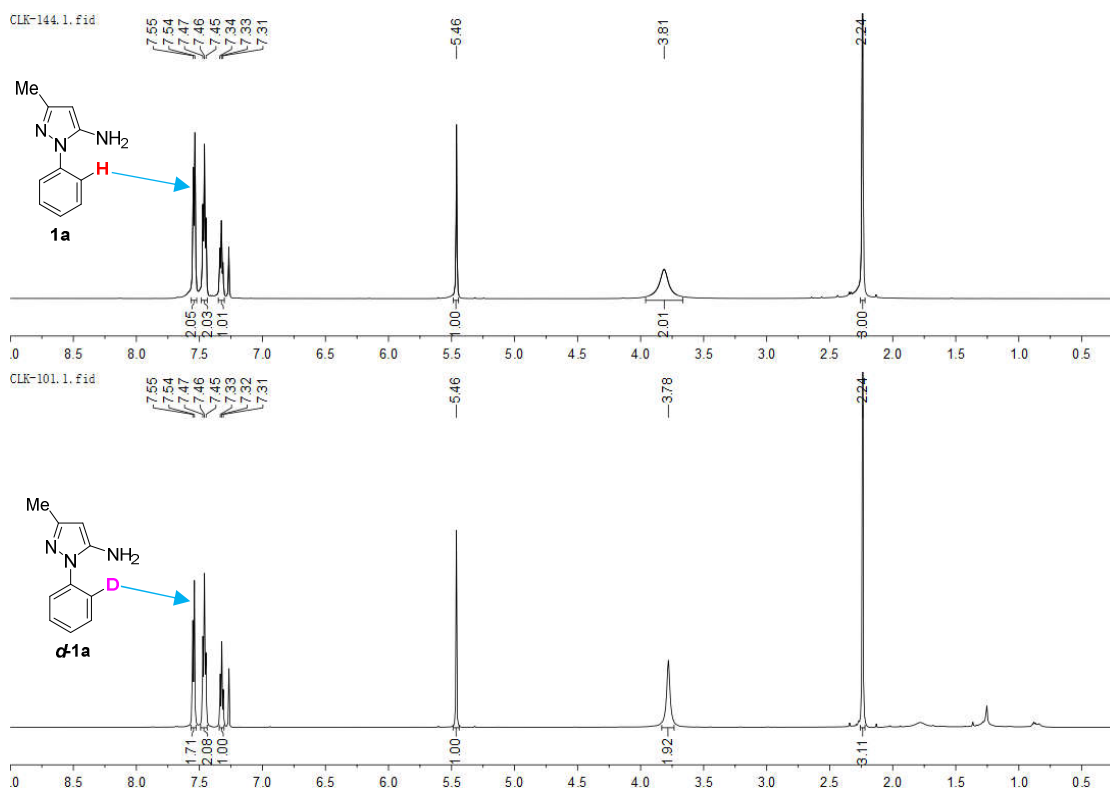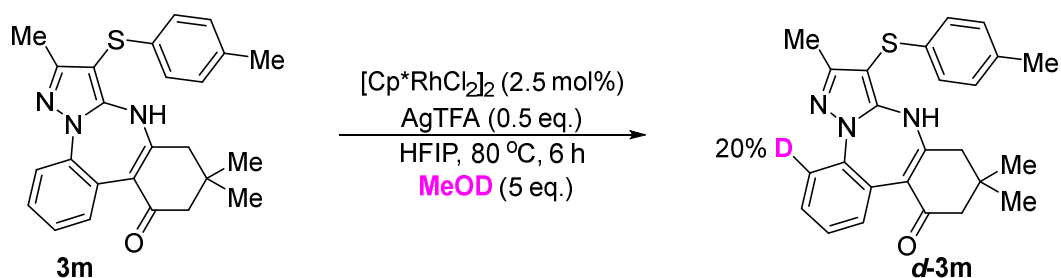

**3m** (0.3 mmol),  $[\text{Cp}^*\text{RuCl}_2]_2$  (2.5 mol%), AgTFA (0.15 mmol), HFIP (1.5 mL) and MeOD (1.5 mmol) were charged into a 10 mL Ace Glass pressure tubes, and the mixture was stirred at 80 °C for 6.0 h. The mixture was cooled to room temperature, and then EtOAc (15 mL  $\times$  2) were added. The organic phase was washed with water (10 mL), dried over  $\text{Na}_2\text{SO}_4$ , concentrated and purified by flash column chromatography to afford **d-3m**.

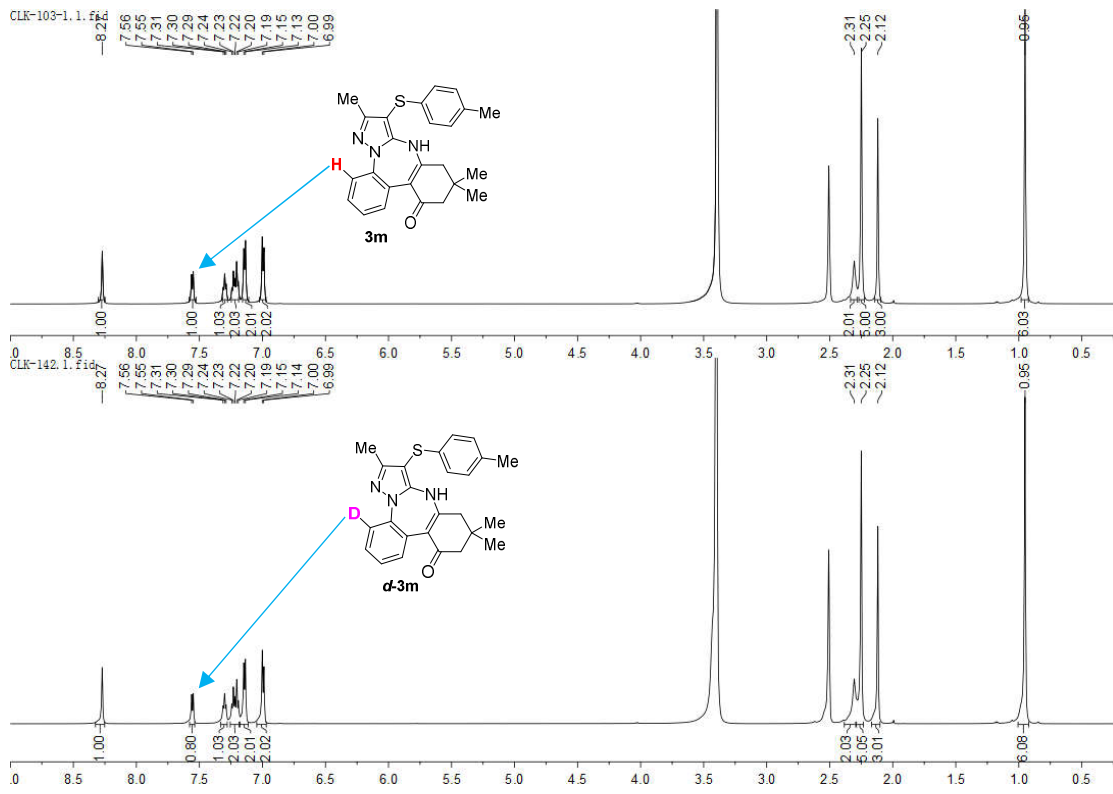



#### 4. Spectroscopic data.

##### 7,11,11-Trimethyl-11,12-dihydro-9H-dibenzo[*d,f*]pyrazolo[1,5-*a*][1,3]diazepin-13(10*H*)-one (3a)

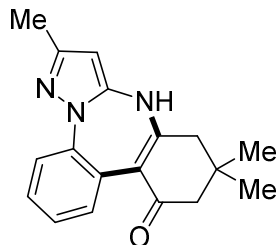

$V_{\text{Petroleum ether}}/V_{\text{Ethyl acetate}} = 5:1$ ,  $R_f = 0.25$ ; Yellow solid: 78 mg (89%); mp = 296–298 °C;  $^1\text{H NMR}$  (600 MHz,  $\text{DMSO-}d_6$ ):  $\delta = 8.83$  (s, 1H, NH), 7.50–7.45 (m, 1H, ArH), 7.22–7.18 (m, 1H, ArH), 7.15–7.12 (m, 2H, ArH), 5.60 (s, 1H, C=CH), 2.45 (s, 2H,  $\text{CH}_2$ ), 2.28 (s, 3H,  $\text{CH}_3$ ), 2.12 (s, 2H,  $\text{CH}_2$ ), 1.03 (s, 3H,  $\text{CH}_3$ ), 1.02 (s, 3H,  $\text{CH}_3$ );  $^{13}\text{C NMR}$  (150 MHz,  $\text{DMSO-}d_6$ ):  $\delta = 195.4$ , 164.7, 150.9, 148.9, 139.0, 132.2, 127.5, 126.7, 125.5, 122.3, 114.6, 95.9, 50.8, 44.0, 30.3, 27.8, 27.8, 14.2; HRMS (TOF ES<sup>+</sup>): m/z calcd for  $\text{C}_{18}\text{H}_{20}\text{N}_3\text{O}$  [(M+H)<sup>+</sup>], 294.1605, found, 294.1594.

##### 2,7,11,11-Tetramethyl-11,12-dihydro-9H-dibenzo[*d,f*]pyrazolo[1,5-*a*][1,3]diazepin-13(10*H*)-one (3b)

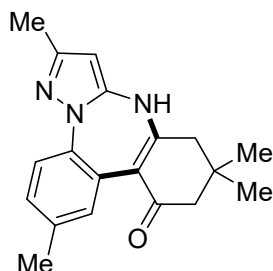

$V_{\text{Petroleum ether}}/V_{\text{Ethyl acetate}} = 5:1$ ,  $R_f = 0.25$ ; Yellow solid: 85 mg (92%); mp = 272–274 °C;  $^1\text{H NMR}$  (600 MHz,  $\text{DMSO-}d_6$ ):  $\delta = 8.76$  (s, 1H, NH), 7.37 (d,  $J = 8.2$  Hz, 1H, ArH), 7.01 (d,  $J = 8.1$  Hz, 1H, ArH), 6.96 (s, 1H, ArH), 5.57 (s, 1H, C=CH), 2.44 (s, 2H,  $\text{CH}_2$ ), 2.27 (s, 2H,  $\text{CH}_2$ ), 2.24 (s, 3H, Ar $\text{CH}_3$ ), 2.12 (s, 3H,  $\text{CH}_3$ ), 1.03 (s, 6H, 2 $\text{CH}_3$ );  $^{13}\text{C NMR}$  (150 MHz,  $\text{DMSO-}d_6$ ):  $\delta = 195.3$ , 164.6, 150.5, 148.6, 136.7, 134.4, 132.4, 128.1, 126.5, 122.2, 114.7, 95.7, 50.9, 44.1, 30.3, 27.9, 27.9, 20.9, 14.2; HRMS (TOF ES<sup>+</sup>): m/z calcd for  $\text{C}_{19}\text{H}_{22}\text{N}_3\text{O}$  [(M+H)<sup>+</sup>], 308.1757, found, 308.1758.

##### 2-Methoxy-7,11,11-trimethyl-11,12-dihydro-9H-dibenzo[*d,f*]pyrazolo[1,5-*a*][1,3]diazepin-13(10*H*)-one (3c)

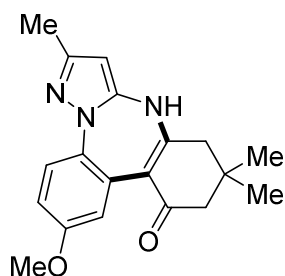

$V_{\text{Petroleum ether}}/V_{\text{Ethyl acetate}} = 4:1$ ,  $R_f = 0.25$ ; Yellow solid: 91 mg (94%); mp = 285–287 °C;  $^1\text{H NMR}$  (600 MHz,  $\text{DMSO-}d_6$ ):  $\delta = 8.81$  (s, 1H, NH), 7.40 (d,  $J = 8.9$  Hz, 1H, ArH), 6.83–6.81 (m, 1H, ArH), 6.71 (d,  $J = 2.6$  Hz, 1H, ArH), 5.76 (s, 1H, C=CH), 3.71 (t,  $J = 3.2$  Hz, 3H, ArOCH<sub>3</sub>), 2.45 (s, 2H, CH<sub>2</sub>), 2.28 (s, 2H, CH<sub>2</sub>), 2.12 (s, 3H, CH<sub>3</sub>), 1.02 (s, 6H, 2CH<sub>3</sub>);  $^{13}\text{C NMR}$  (150 MHz,  $\text{DMSO-}d_6$ ):  $\delta = 195.3$ , 164.9, 156.8, 150.2, 148.1, 132.4, 127.9, 123.3, 117.3, 114.4, 112.9, 95.5, 55.7, 50.9, 44.2, 30.2, 27.8, 27.8, 14.2; HRMS (TOF ES<sup>+</sup>):  $m/z$  calcd for  $\text{C}_{19}\text{H}_{22}\text{N}_3\text{O}_2$  [(M+H)<sup>+</sup>], 324.1707, found, 324.1705.

**2-Fluoro-7,11,11-trimethyl-11,12-dihydro-9H-dibenzo[*d,f*]pyrazolo[1,5-*a*][1,3]diazepin-13(10H)-one (3d)**

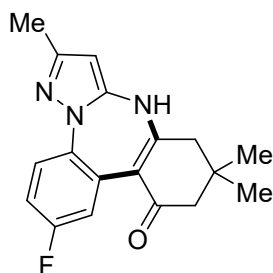

$V_{\text{Petroleum ether}}/V_{\text{Ethyl acetate}} = 3:1$ ,  $R_f = 0.25$ ; Yellow solid: 78 mg (84%); mp = 275–277 °C;  $^1\text{H NMR}$  (600 MHz,  $\text{DMSO-}d_6$ ):  $\delta = 8.98$  (s, 1H, NH), 7.51–7.48 (m, 1H, ArH), 7.09–7.06 (m, 1H, ArH), 6.99–6.97 (m, 1H, ArH), 5.61 (s, 1H, C=CH), 2.47 (s, 2H, CH<sub>2</sub>), 2.29 (s, 2H, CH<sub>2</sub>), 2.13 (s, 3H, CH<sub>3</sub>), 1.02 (s, 6H, 2CH<sub>3</sub>);  $^{13}\text{C NMR}$  (150 MHz,  $\text{DMSO-}d_6$ ):  $\delta = 195.1$ , 165.4, 159.7 (d,  $J = 240.9$  Hz), 151.0, 148.4, 135.4 (d,  $J = 2.5$  Hz), 128.7 (d,  $J = 9.0$  Hz), 123.9 (d,  $J = 8.7$  Hz), 118.2 (d,  $J = 24.1$  Hz), 114.4 (d,  $J = 22.6$  Hz), 113.4, 96.1, 50.7, 44.2, 30.3, 27.8, 27.8, 14.2; HRMS (TOF ES<sup>+</sup>):  $m/z$  calcd for  $\text{C}_{18}\text{H}_{19}\text{FN}_3\text{O}$  [(M+H)<sup>+</sup>], 312.1507, found, 312.1509.

**2-Bromo-7,11,11-trimethyl-11,12-dihydro-9H-dibenzo[*d,f*]pyrazolo[1,5-*a*][1,3]diazepin-13(10H)-one (3e)**

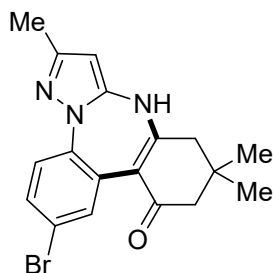

$V_{\text{Petroleum ether}}/V_{\text{Ethyl acetate}} = 5:1$ ,  $R_f = 0.25$ ; Yellow solid: 100 mg (90%); mp = 323–325 °C;  $^1\text{H NMR}$  (600 MHz,  $\text{DMSO-}d_6$ ):  $\delta = 9.04$  (s, 1H, NH), 7.43 (t,  $J = 6.4$  Hz, 1H, ArH), 7.39 (d,  $J = 6.3$  Hz, 1H, ArH), 7.33–7.29 (m, 1H, ArH), 5.62 (s, 1H, C=CH), 2.46 (s, 2H,  $\text{CH}_2$ ), 2.29 (s, 2H,  $\text{CH}_2$ ), 2.12 (s, 3H  $\text{CH}_3$ ), 1.02 (s, 6H, 2 $\text{CH}_3$ );  $^{13}\text{C NMR}$  (150 MHz,  $\text{DMSO-}d_6$ ):  $\delta = 195.1, 165.5, 151.5, 148.7, 138.3, 134.3, 130.2, 128.5, 124.2, 118.0, 113.1, 96.5, 50.6, 44.1, 30.3, 27.8, 27.8, 14.2$ ; HRMS (TOF ES<sup>+</sup>): m/z calcd for  $\text{C}_{18}\text{H}_{19}\text{BrN}_3\text{O}$  [(M+H)<sup>+</sup>], 372.0706, found, 372.0708.

**7,11,11-Trimethyl-13-oxo-10,11,12,13-tetrahydro-9H-dibenzo[d,f]pyrazolo[1,5-a][1,3]diazepine-2-carbonitrile (3f)**

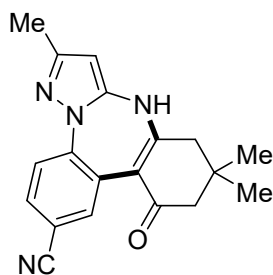

$V_{\text{Petroleum ether}}/V_{\text{Ethyl acetate}} = 2:1$ ,  $R_f = 0.25$ ; Yellow solid: 89 mg (94%); mp = 299–301 °C;  $^1\text{H NMR}$  (600 MHz,  $\text{DMSO-}d_6$ ):  $\delta = 7.67$  (d,  $J = 8.4$  Hz, 1H, ArH), 7.63 (d,  $J = 8.5$  Hz, 1H, ArH), 7.58 (s, 1H, ArH), 5.67 (s, 1H, C=CH), 2.48 (s, 2H,  $\text{CH}_2$ ), 2.31 (s, 2H,  $\text{CH}_2$ ), 2.14 (s, 3H,  $\text{CH}_3$ ), 1.03 (s, 6H, 2 $\text{CH}_3$ );  $^{13}\text{C NMR}$  (150 MHz,  $\text{DMSO-}d_6$ ):  $\delta = 195.0, 165.3, 152.7, 149.2, 142.8, 136.4, 131.0, 127.0, 123.1, 119.1, 112.4, 107.9, 97.2, 50.5, 44.1, 30.3, 27.9, 27.9, 14.2$ ; HRMS (TOF ES<sup>+</sup>): m/z calcd for  $\text{C}_{19}\text{H}_{19}\text{N}_4\text{O}$  [(M+H)<sup>+</sup>], 319.1553, found, 319.1551.

**2-Bromo-7,11,11-trimethyl-11,12-dihydro-9H-dibenzo[d,f]pyrazolo[1,5-a][1,3]diazepin-13(10H)-one (3g)**

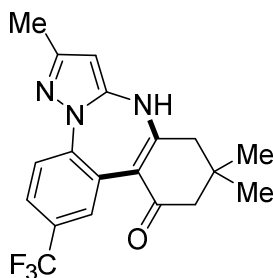

$V_{\text{Petroleum ether}}/V_{\text{Ethyl acetate}} = 3:1$ ,  $R_f = 0.25$ ; Yellow solid: 94 mg (87%); mp = 267–269 °C;  $^1\text{H NMR}$  (600 MHz,  $\text{DMSO-}d_6$ ):  $\delta = 9.12$  (s, 1H, NH), 7.70 (d,  $J = 8.5$  Hz, 1H, ArH), 7.55 (d,  $J = 8.5$  Hz, 1H, ArH), 7.48 (s, 1H, ArH), 5.66 (s, 1H, C=CH), 2.48 (s, 2H,  $\text{CH}_2$ ), 2.31 (s, 2H,  $\text{CH}_2$ ), 2.14 (s, 3H,  $\text{CH}_3$ ), 1.03 (s, 6H, 2 $\text{CH}_3$ );  $^{13}\text{C NMR}$  (150 MHz,  $\text{DMSO-}d_6$ ):  $\delta = 195.2, 165.4, 152.3, 149.2, 142.2, 129.0$  ( $J_{\text{C-F}} = 3.5$  Hz), 126.9, 125.7 ( $J_{\text{C-F}} = 31.5$  Hz), 124.6 ( $J_{\text{C-F}} = 270.0$  Hz), 124.3 ( $J_{\text{C-F}} = 3.3$  Hz), 123.0, 112.9, 96.9, 50.6, 44.1, 30.3, 27.8, 27.8, 14.2; HRMS (TOF ES<sup>+</sup>): m/z calcd for  $\text{C}_{19}\text{H}_{19}\text{F}_3\text{N}_3\text{O}$  [(M+H)<sup>+</sup>], 362.1475, found, 362.1475.

**7,11,11-Trimethyl-2-(trifluoromethoxy)-11,12-dihydro-9H-dibenzo[*d,f*]pyrazolo[1,5-*a*][1,3]diazepin-13(10*H*)-one (3h)**

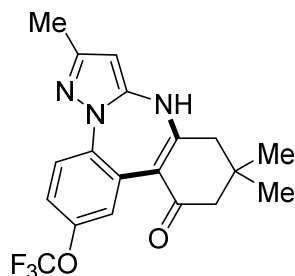

$V_{\text{Petroleum ether}}/V_{\text{Ethyl acetate}} = 3:1$ ,  $R_f = 0.25$ ; Yellow solid: 99 mg (88%); mp = 240–242 °C;  $^1\text{H NMR}$  (600 MHz,  $\text{DMSO-}d_6$ ):  $\delta = 9.07$  (s, 1H, NH), 7.59 (d,  $J = 9.0$  Hz, 1H, ArH), 7.22 (d,  $J = 8.7$  Hz, 1H, ArH), 7.14 (s, 1H, ArH), 5.64 (s, 1H, C=CH), 2.48 (s, 2H,  $\text{CH}_2$ ), 2.30 (s, 2H,  $\text{CH}_2$ ), 2.14 (s, 3H,  $\text{CH}_3$ ), 1.02 (s, 6H, 2 $\text{CH}_3$ );  $^{13}\text{C NMR}$  (150 MHz,  $\text{DMSO-}d_6$ ):  $\delta = 195.1, 165.5, 151.6, 148.7, 145.6, 138.0, 128.3, 124.4, 123.8, 120.6$  ( $J = 253.5$  Hz), 120.1, 112.9, 96.5, 50.6, 44.2, 30.3, 27.8, 27.8, 14.2; HRMS (TOF ES<sup>+</sup>):  $m/z$  calcd for  $\text{C}_{19}\text{H}_{19}\text{F}_3\text{N}_3\text{O}_2$  [(M+H)<sup>+</sup>], 378.1424, found, 378.1427.

**8,12,12-Trimethyl-12,13-dihydro-10H-benzo[*d*]naphtho[2,3-*f*]pyrazolo[1,5-*a*][1,3]diazepin-14(11*H*)-one (3i)**

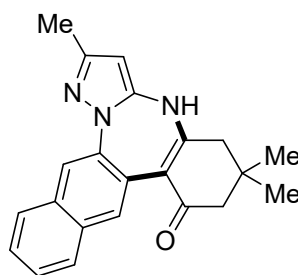

$V_{\text{Petroleum ether}}/V_{\text{Ethyl acetate}} = 2:1$ ,  $R_f = 0.25$ ; Yellow solid: 97 mg (95%); mp = 285–287 °C;  $^1\text{H NMR}$  (600 MHz,  $\text{DMSO-}d_6$ ):  $\delta = 9.07$  (s, 1H, NH), 8.01 (s, 1H, ArH), 7.87 (d,  $J = 7.9$  Hz, 1H, ArH), 7.81 (d,  $J = 7.9$  Hz, 1H, ArH), 7.73 (s, 1H, ArH), 7.45–7.40 (m, 2H, ArH), 5.70 (s, 1H, C=CH), 2.50 (s, 2H,  $\text{CH}_2$ ), 2.35 (s, 2H,  $\text{CH}_2$ ), 2.19 (s, 3H,  $\text{CH}_3$ ), 1.08 (s, 6H, 2 $\text{CH}_3$ );  $^{13}\text{C NMR}$  (150 MHz,  $\text{DMSO-}d_6$ ):  $\delta = 195.5, 163.1, 151.0, 148.8, 137.6, 132.2, 131.3, 131.2, 128.1, 127.7, 127.0, 126.2, 124.9, 119.5, 114.3, 96.1, 50.9, 44.1, 30.3, 27.9, 27.9, 14.3$ ; HRMS (TOF ES<sup>+</sup>):  $m/z$  calcd for  $\text{C}_{22}\text{H}_{22}\text{N}_3\text{O}$  [(M+H)<sup>+</sup>], 344.1757, found, 344.1760.

**7,11,11-Trimethyl-8-phenyl-11,12-dihydro-9H-dibenzo[*d,f*]pyrazolo[1,5-*a*][1,3]diazepin-13(10*H*)-one (3j)**

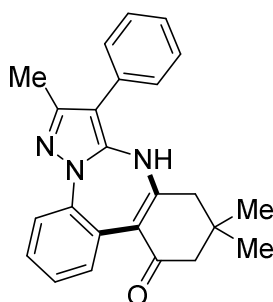

$V_{\text{Petroleum ether}}/V_{\text{Ethyl acetate}} = 3:1$ ,  $R_f = 0.25$ ; Yellow solid: 90 mg (82%); mp = 242–244 °C;  $^1\text{H NMR}$  (600 MHz,  $\text{CDCl}_3$ )  $\delta = 7.74\text{--}7.69$  (m, 1H, ArH), 7.52–7.46 (m, 2H, ArH), 7.37 (d,  $J = 16.0$  Hz, 2H, ArH), 7.30 (d,  $J = 6.8$  Hz, 1H, ArH), 7.24 (s, 3H, ArH), 5.44 (s, 1H, NH), 2.40 (s, 2H,  $\text{CH}_2$ ), 2.34 (s, 2H,  $\text{CH}_2$ ), 2.28 (s, 3H,  $\text{CH}_3$ ), 1.11 (s, 6H, 2 $\text{CH}_3$ );  $^{13}\text{C NMR}$  (150 MHz,  $\text{CDCl}_3$ )  $\delta = 195.8, 161.3, 149.2, 143.9, 138.6, 131.8, 131.3, 129.4, 129.4, 129.1, 129.1, 128.1, 127.4, 125.7, 125.5, 122.6, 117.6, 109.6, 50.9, 45.4, 30.6, 27.9, 27.9, 12.9$ ; HRMS (TOF ES<sup>+</sup>):  $m/z$  calcd for  $\text{C}_{24}\text{H}_{24}\text{N}_3\text{O}$  [(M+H)<sup>+</sup>], 370.1914, found, 370.1914.

**7,11,11-Trimethyl-8-(*p*-tolyl)-11,12-dihydro-9*H*-dibenzo[*d,f*]pyrazolo[1,5-*a*][1,3]diazepin-13(10*H*)-one (3k)**

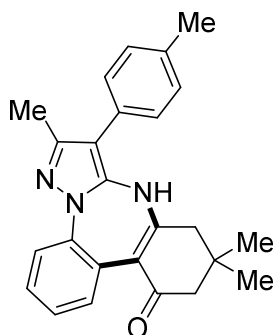

$V_{\text{Petroleum ether}}/V_{\text{Ethyl acetate}} = 5:1$ ,  $R_f = 0.25$ ; Yellow solid: 86 mg (75%); mp = 289–291 °C;  $^1\text{H NMR}$  (600 MHz,  $\text{CDCl}_3$ )  $\delta = 7.73\text{--}7.70$  (m, 1H, ArH), 7.38–7.35 (m, 1H, ArH), 7.31–7.27 (m, 3H, ArH), 7.24–7.20 (m, 1H, ArH), 7.14 (d,  $J = 7.8$  Hz, 2H, ArH), 5.42 (s, 1H, NH), 2.42 (s, 3H, Ar $\text{CH}_3$ ), 2.39 (s, 2H,  $\text{CH}_2$ ), 2.33 (s, 2H,  $\text{CH}_2$ ), 2.26 (s, 3H,  $\text{CH}_3$ ), 1.11 (s, 6H, 2 $\text{CH}_3$ );  $^{13}\text{C NMR}$  (150 MHz,  $\text{CDCl}_3$ )  $\delta = 195.7, 161.3, 149.2, 143.8, 138.6, 137.2, 131.7, 130.1, 130.1, 128.9, 128.9, 128.2, 127.9, 125.6, 125.4, 122.5, 117.4, 109.5, 50.9, 45.3, 30.5, 27.9, 27.9, 21.2, 12.9$ ; HRMS (TOF ES<sup>+</sup>):  $m/z$  calcd for  $\text{C}_{25}\text{H}_{26}\text{N}_3\text{O}$  [(M+H)<sup>+</sup>], 384.2070, found, 384.2071.

**7,11,11-Trimethyl-8-(*m*-tolyl)-11,12-dihydro-9*H*-dibenzo[*d,f*]pyrazolo[1,5-*a*][1,3]diazepin-13(10*H*)-one (3l)**

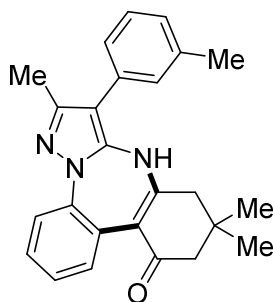

$V_{\text{Petroleum ether}}/V_{\text{Ethyl acetate}} = 6:1$ ,  $R_f = 0.25$ ; White solid: 62 mg (54%); mp = 265–267 °C;  $^1\text{H NMR}$  (600 MHz,  $\text{CDCl}_3$ )  $\delta = 7.72$  (d,  $J = 7.8$  Hz, 1H, ArH), 7.40–7.36 (m, 2H, ArH), 7.31–7.28 (m, 1H, ArH), 7.22 (d,  $J = 7.3$  Hz, 1H, ArH), 7.19 (d,  $J = 7.4$  Hz, 1H, ArH), 7.08–7.04 (m, 2H, ArH), 5.42 (s, 1H, NH), 2.43 (s, 3H, Ar $\text{CH}_3$ ), 2.41 (s, 2H,  $\text{CH}_2$ ), 2.34 (s, 2H,  $\text{CH}_2$ ), 2.27 (s, 3H,  $\text{CH}_3$ ), 1.12 (s, 6H, 2 $\text{CH}_3$ );  $^{13}\text{C NMR}$  (150 MHz,

CDCl<sub>3</sub>)  $\delta$  = 195.7, 161.2, 149.1, 143.9, 139.1, 138.6, 131.8, 131.2, 129.8, 129.3, 128.1, 128.0, 125.9, 125.6, 125.4, 122.5, 117.5, 109.7, 50.9, 45.4, 30.6, 27.9, 27.9, 21.6, 12.9; HRMS (TOF ES<sup>+</sup>):  $m/z$  calcd for C<sub>25</sub>H<sub>26</sub>N<sub>3</sub>O [(M+H)<sup>+</sup>], 384.2070, found, 384.2071.

**7,11,11-Trimethyl-8-(*p*-tolylthio)-11,12-dihydro-9*H*-dibenzo[*d,f*]pyrazolo[1,5-*a*][1,3]diazepin-13(10*H*)-one (3m)**

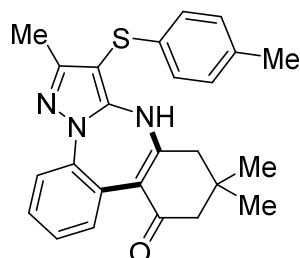

V<sub>Petroleum ether</sub>/V<sub>Ethyl acetate</sub> = 5:1, R<sub>f</sub> = 0.25; Yellow solid: 95 mg (76%); mp = 165–167 °C; <sup>1</sup>H NMR (600 MHz, CDCl<sub>3</sub>)  $\delta$  = 7.71 (d, *J* = 7.9 Hz, 1H, ArH), 7.35 (d, *J* = 7.6 Hz, 1H, ArH), 7.30 (t, *J* = 8.6 Hz, 1H, ArH), 7.27–7.24 (m, 1H, ArH), 7.08 (d, *J* = 7.7 Hz, 2H, ArH), 6.97 (d, *J* = 7.8 Hz, 2H, ArH), 5.68 (s, 1H, NH), 2.34 (s, 2H, CH<sub>2</sub>), 2.30 (s, 3H, ArCH<sub>3</sub>), 2.25 (s, 3H, CH<sub>3</sub>), 2.18 (s, 2H, CH<sub>2</sub>), 1.05 (s, 6H, 2CH<sub>3</sub>); <sup>13</sup>C NMR (150 MHz, CDCl<sub>3</sub>)  $\delta$  = 195.7, 161.3, 154.3, 150.0, 138.4, 135.7, 133.5, 132.0, 130.0, 130.0, 128.2, 126.0, 125.8, 125.8, 125.3, 122.3, 117.4, 94.3, 50.9, 45.2, 30.6, 27.8, 27.8, 20.9, 12.5; HRMS (TOF ES<sup>+</sup>):  $m/z$  calcd for C<sub>25</sub>H<sub>26</sub>N<sub>3</sub>OS [(M+H)<sup>+</sup>], 416.1791, found, 416.1798.

**7,11,11-Trimethyl-8-(naphthalen-1-ylthio)-11,12-dihydro-9*H*-dibenzo[*d,f*]pyrazolo[1,5-*a*][1,3]diazepin-13(10*H*)-one (3n)**

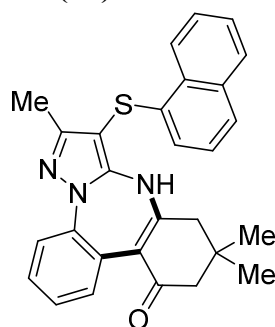

V<sub>Petroleum ether</sub>/V<sub>Ethyl acetate</sub> = 5:1, R<sub>f</sub> = 0.25; Yellow solid: 108 mg (80%); mp = 211–213 °C; <sup>1</sup>H NMR (600 MHz, CDCl<sub>3</sub>)  $\delta$  = 7.80–7.74 (m, 3H, ArH), 7.67 (d, *J* = 8.0 Hz, 1H, ArH), 7.48–7.39 (m, 3H, ArH), 7.36–7.31 (m, 2H, ArH), 7.26–7.22 (m, 2H, ArH), 5.66 (s, 1H, NH), 2.30 (s, 3H, CH<sub>3</sub>), 2.24 (s, 2H, CH<sub>2</sub>), 2.01 (s, 2H, CH<sub>2</sub>), 0.90 (s, 6H, 2CH<sub>3</sub>); <sup>13</sup>C NMR (150 MHz, CDCl<sub>3</sub>)  $\delta$  = 195.8, 161.4, 154.4, 150.0, 138.4, 134.7, 133.8, 132.1, 131.6, 129.1, 128.2, 127.8, 127.0, 126.9, 126.2, 125.8, 125.5, 124.1, 123.1, 122.4, 117.5, 93.8, 50.8, 45.1, 30.4, 27.7, 27.7, 12.6; HRMS (TOF ES<sup>+</sup>):  $m/z$  calcd for C<sub>28</sub>H<sub>26</sub>N<sub>3</sub>OS [(M+H)<sup>+</sup>], 452.1791, found, 452.1798.

**11,11-Dimethyl-7-(*p*-tolyl)-11,12-dihydro-9*H*-dibenzo[*d,f*]pyrazolo[1,5-*a*][1,3]diazepin-13(10*H*)-one (3o)**

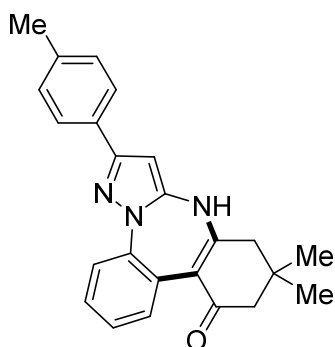

$V_{\text{Petroleum ether}}/V_{\text{Ethyl acetate}} = 2:1$ ,  $R_f = 0.25$ ; Yellow solid: 38 mg (35%); mp = 302–304 °C;  $^1\text{H NMR}$  (600 MHz,  $\text{CDCl}_3$ )  $\delta = 7.80$  (d,  $J = 7.9$  Hz, 1H, ArH), 7.69 (d,  $J = 7.8$  Hz, 2H, ArH), 7.38 (d,  $J = 7.5$  Hz, 1H, ArH), 7.30 (s, 1H, ArH), 7.22 (d,  $J = 7.9$  Hz, 3H, ArH), 5.96 (s, 1H, NH), 5.54 (s, 1H, C=CH), 2.45 (s, 2H,  $\text{CH}_2$ ), 2.40 (s, 2H,  $\text{CH}_2$ ), 2.38 (s, 3H, Ar $\text{CH}_3$ ), 1.14 (s, 6H, 2 $\text{CH}_3$ );  $^{13}\text{C NMR}$  (150 MHz,  $\text{CDCl}_3$ )  $\delta = 195.7$ , 161.5, 152.9, 147.8, 138.6, 138.2, 131.7, 129.9, 129.3, 129.3, 127.9, 125.8, 125.7, 125.5, 125.5, 122.9, 117.3, 92.4, 50.9, 45.6, 30.5, 27.9, 27.9, 21.4; HRMS (TOF ES $^+$ ):  $m/z$  calcd for  $\text{C}_{24}\text{H}_{24}\text{N}_3\text{O}$  [(M+H) $^+$ ], 370.1914, found, 370.1912.

**7-(Furan-2-yl)-11,11-dimethyl-11,12-dihydro-9*H*-dibenzo[*d,f*]pyrazolo[1,5-*a*][1,3]diazepin-13(10*H*)-one (3p)**

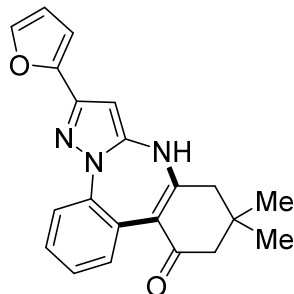

$V_{\text{Petroleum ether}}/V_{\text{Ethyl acetate}} = 5:1$ ,  $R_f = 0.25$ ; Yellow solid: 47 mg (45%); mp = 276–278 °C;  $^1\text{H NMR}$  (600 MHz,  $\text{DMSO-}d_6$ ):  $\delta = 8.97$  (s, 1H, NH), 7.75 (s, 1H, C=CH), 7.57 (d,  $J = 8.0$  Hz, 1H, C=CH), 7.28–7.25 (m, 1H, ArH), 7.22–7.19 (m, 2H, ArH), 6.84 (d,  $J = 3.0$  Hz, 1H, ArH), 6.61–6.59 (m, 1H, C=CH), 6.04 (s, 1H, C=CH), 2.50 (s, 2H,  $\text{CH}_2$ ), 2.30 (s, 2H,  $\text{CH}_2$ ), 1.04 (s, 6H, 2 $\text{CH}_3$ );  $^{13}\text{C NMR}$  (150 MHz,  $\text{DMSO-}d_6$ ):  $\delta = 195.5$ , 164.9, 149.4, 148.1, 145.3, 143.4, 138.7, 132.3, 127.8, 127.1, 126.1, 122.7, 114.9, 112.2, 107.6, 92.9, 50.8, 44.1, 30.4, 27.8, 27.8; HRMS (TOF ES $^+$ ):  $m/z$  calcd for  $\text{C}_{21}\text{H}_{20}\text{N}_3\text{O}_2$  [(M+H) $^+$ ], 346.1550, found, 346.1547.

**11,11-Dimethyl-7-(thiophen-2-yl)-11,12-dihydro-9*H*-dibenzo[*d,f*]pyrazolo[1,5-*a*][1,3]diazepin-13(10*H*)-one (3q)**

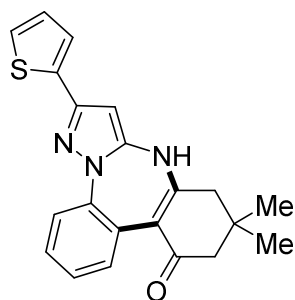

$V_{\text{Petroleum ether}}/V_{\text{Ethyl acetate}} = 5:1$ ,  $R_f = 0.25$ ; Yellow solid: 52 mg (48%); mp = 284–286 °C;  $^1\text{H NMR}$  (600 MHz,  $\text{DMSO-}d_6$ ):  $\delta = 8.97$  (s, 1H, NH), 7.54 (m, 2H, C=CH), 7.49–7.47 (m, 1H, ArH), 7.29–7.26 (m, 1H, ArH), 7.21–7.19 (m, 2H, ArH), 7.13–7.10 (m, 1H, C=CH), 6.13 (s, 1H, C=CH), 2.51 (s, 2H,  $\text{CH}_2$ ), 2.31 (s, 2H,  $\text{CH}_2$ ), 1.04 (s, 6H, 2 $\text{CH}_3$ );  $^{13}\text{C NMR}$  (150 MHz,  $\text{DMSO-}d_6$ ):  $\delta = 195.4, 164.8, 149.7, 148.5, 138.6, 135.9, 132.3, 128.2, 127.8, 127.0, 126.4, 126.1, 125.7, 122.6, 114.9, 93.2, 50.8, 44.1, 30.4, 27.8, 27.8$ ; HRMS (TOF ES<sup>+</sup>): m/z calcd for  $\text{C}_{21}\text{H}_{20}\text{N}_3\text{OS}$  [(M+H)<sup>+</sup>], 362.1322, found, 362.1322.

**7,11-Dimethyl-11,12-dihydro-9H-dibenzo[d,f]pyrazolo[1,5-a][1,3]diazepin-13(10H)-one (3r)**

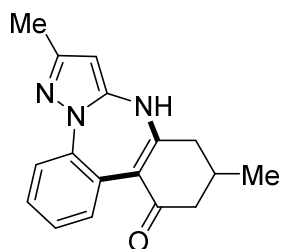

$V_{\text{Petroleum ether}}/V_{\text{Ethyl acetate}} = 5:1$ ,  $R_f = 0.25$ ; Yellow solid: 48 mg (58%); mp = 294–296 °C;  $^1\text{H NMR}$  (600 MHz,  $\text{DMSO-}d_6$ ):  $\delta = 8.86$  (s, 1H, NH), 7.48 (d,  $J = 8.0$  Hz, 1H, ArH), 7.21–7.17 (m, 1H, ArH), 7.12 (d,  $J = 4.2$  Hz, 2H, ArH), 5.59 (s, 1H, C=CH), 2.63 (d,  $J = 15.7$  Hz, 1H,  $\text{CH}_2$ ), 2.39 (d,  $J = 15.2$  Hz, 1H,  $\text{CH}_2$ ), 2.28–2.24 (m, 2H,  $\text{CH}_2$ ), 2.13 (s, 3H,  $\text{CH}_3$ ), 2.08–2.05 (m, 1H, CH), 1.01 (d,  $J = 6.2$  Hz, 3H,  $\text{CH}_3$ );  $^{13}\text{C NMR}$  (150 MHz,  $\text{DMSO-}d_6$ ):  $\delta = 195.5, 165.7, 150.9, 148.8, 139.1, 132.6, 127.5, 126.7, 125.4, 122.2, 115.4, 95.9, 45.6, 38.8, 26.3, 20.4, 14.3$ ; HRMS (TOF ES<sup>+</sup>): m/z calcd for  $\text{C}_{17}\text{H}_{18}\text{N}_3\text{O}$  [(M+H)<sup>+</sup>], 280.1444, found, 280.1442.

**7-Methyl-11-phenyl-11,12-dihydro-9H-dibenzo[d,f]pyrazolo[1,5-a][1,3]diazepin-13(10H)-one (3s)**

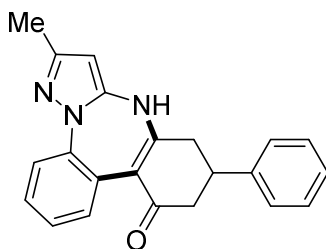



$V_{\text{Petroleum ether}}/V_{\text{Ethyl acetate}} = 5:1$ ,  $R_f = 0.25$ ; Yellow solid: 82 mg (80%); mp = 216–218 °C;  $^1\text{H NMR}$  (600 MHz,  $\text{DMSO-}d_6$ ):  $\delta = 8.97$  (s, 1H, NH), 7.51 (d,  $J = 7.9$  Hz, 1H, ArH), 7.38–7.34 (m, 4H, ArH), 7.26 (t,  $J = 7.0$  Hz, 1H, ArH), 7.24–7.20 (m, 1H, ArH), 7.16 (d,  $J = 6.5$  Hz, 2H, ArH), 5.62 (s, 1H, C=CH), 2.82–2.74 (m, 3H,  $\text{CH}_2$ , CH), 2.56–2.52 (m, 2H,  $\text{CH}_2$ ), 2.14 (s, 3H,  $\text{CH}_3$ );  $^{13}\text{C NMR}$  (150 MHz,  $\text{DMSO-}d_6$ ):  $\delta = 194.9, 165.3, 150.9, 148.7, 143.5, 139.1, 132.7, 129.0, 129.0, 127.6, 127.5, 127.5, 127.2, 126.6, 125.5, 122.3, 115.6, 95.9, 44.4, 38.4, 36.7, 14.3$ ; HRMS (TOF ES+): m/z calcd for  $\text{C}_{22}\text{H}_{20}\text{N}_3\text{O}$   $[(\text{M}+\text{H})^+]$ , 342.1601, found, 342.1603.

**7-Methyl-11,12-dihydro-9H-dibenzo[*d,f*]pyrazolo[1,5-*a*][1,3]diazepin-13(10H)-one (3t)**

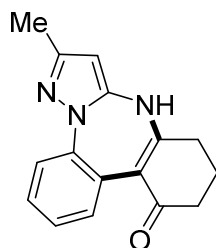

$V_{\text{Petroleum ether}}/V_{\text{Ethyl acetate}} = 5:1$ ,  $R_f = 0.25$ ; Yellow solid: 29 mg (37%); mp = 284–286 °C;  $^1\text{H NMR}$  (600 MHz,  $\text{DMSO-}d_6$ ):  $\delta = 8.90$  (s, 1H, NH), 7.48 (d,  $J = 7.9$  Hz, 1H, ArH), 7.22–7.18 (m, 1H, ArH), 7.13–7.10 (m, 2H, ArH), 5.60 (s, 1H, C=CH), 2.56 (t,  $J = 5.8$  Hz, 2H,  $\text{CH}_2$ ), 2.35 (t,  $J = 6.4$  Hz, 2H,  $\text{CH}_2$ ), 2.13 (s, 3H,  $\text{CH}_3$ ), 1.82–1.78 (m, 2H,  $\text{CH}_2$ );  $^{13}\text{C NMR}$  (150 MHz,  $\text{DMSO-}d_6$ ):  $\delta = 195.7, 166.2, 150.9, 148.8, 139.1, 132.8, 127.5, 126.8, 125.4, 122.2, 115.8, 95.9, 37.6, 30.9, 19.2, 14.2$ ; HRMS (TOF ES+): m/z calcd for  $\text{C}_{16}\text{H}_{16}\text{N}_3\text{O}$   $[(\text{M}+\text{H})^+]$ , 266.1288, found, 266.1288.

**7,12,12-Trimethyl-11,12-dihydro-9H-dibenzo[*d,f*]pyrazolo[1,5-*a*][1,3]diazepin-13(10H)-one (3u)**

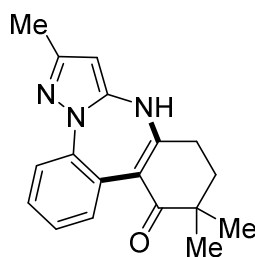

$V_{\text{Petroleum ether}}/V_{\text{Ethyl acetate}} = 3:1$ ,  $R_f = 0.25$ ; Yellow solid: 33 mg (38%); mp = 243–245 °C;  $^1\text{H NMR}$  (600 MHz,  $\text{DMSO-}d_6$ ):  $\delta = 8.82$  (s, 1H, NH), 7.48 (d,  $J = 8.0$  Hz, 1H, ArH), 7.19 (t,  $J = 7.6$  Hz, 1H, ArH), 7.11 (t,  $J = 7.5$  Hz, 1H, ArH), 6.99 (d,  $J = 7.8$  Hz, 1H, ArH), 5.59 (s, 1H, C=CH), 2.55 (t,  $J = 6.0$  Hz, 2H,  $\text{CH}_2$ ), 2.12 (s, 3H,  $\text{CH}_3$ ), 1.72 (t,  $J = 6.0$  Hz, 2H,  $\text{CH}_2$ ), 1.06 (s, 6H, 2 $\text{CH}_3$ );  $^{13}\text{C NMR}$  (150 MHz,  $\text{DMSO-}d_6$ ):  $\delta = 200.9, 164.2, 150.9, 148.9, 139.3, 132.9, 127.5, 127.1, 125.4, 122.2, 114.4, 95.8, 32.7, 27.2, 25.4, 25.4, 25.4, 14.3$ ; HRMS (TOF ES+): m/z calcd for  $\text{C}_{18}\text{H}_{20}\text{N}_3\text{O}$   $[(\text{M}+\text{H})^+]$ , 294.1601, found, 294.1603.

**7-Methyl-10,11-dihydrobenzo[*f*]cyclopenta[*d*]pyrazolo[1,5-*a*][1,3]diazepin-12(9*H*)-one (3v)**

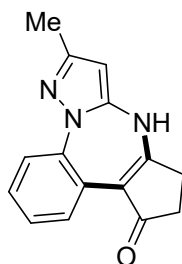

$V_{\text{Petroleum ether}}/V_{\text{Ethyl acetate}} = 2:1$ ,  $R_f = 0.25$ ; Yellow solid: 47 mg (62%); mp = 259–261 °C;  $^1\text{H NMR}$  (600 MHz,  $\text{DMSO-}d_6$ ):  $\delta = 10.03$  (s, 1H, NH), 8.18–8.15 (m, 1H, ArH), 7.68–7.65 (m, 1H, ArH), 7.09–7.04 (m, 2H, ArH), 5.59 (s, 1H, C=CH), 3.45 (s, 2H,  $\text{CH}_2$ ), 2.41 (d,  $J = 5.1$  Hz, 2H,  $\text{CH}_2$ ), 2.09 (s, 3H,  $\text{CH}_3$ );  $^{13}\text{C NMR}$  (150 MHz,  $\text{DMSO-}d_6$ ):  $\delta = 201.6, 173.2, 150.9, 145.1, 137.3, 127.3, 126.9, 126.1, 123.9, 122.1, 112.2, 96.5, 34.3, 26.3, 14.1$ ; HRMS (TOF ES<sup>+</sup>):  $m/z$  calcd for  $\text{C}_{15}\text{H}_{14}\text{N}_3\text{O}$  [(M+H)<sup>+</sup>], 252.1131, found, 252.1131.

**7-Methyl-10,11,12,13-tetrahydrobenzo[*f*]cyclohepta[*d*]pyrazolo[1,5-*a*][1,3]diazepin-14(9*H*)-one (3w)**

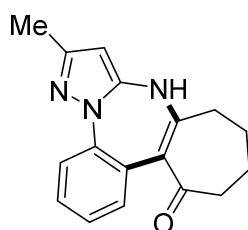

$V_{\text{Petroleum ether}}/V_{\text{Ethyl acetate}} = 3:1$ ,  $R_f = 0.25$ ; Yellow solid: 21 mg (25%); mp = 221–223 °C;  $^1\text{H NMR}$  (600 MHz,  $\text{DMSO-}d_6$ ):  $\delta = 8.79$  (s, 1H, NH), 7.41 (d,  $J = 7.8$  Hz, 1H, ArH), 7.17 (t,  $J = 7.6$  Hz, 2H, ArH), 7.14–7.11 (m, 1H, ArH), 5.61 (s, 1H, C=CH), 2.69–2.65 (m, 2H,  $\text{CH}_2$ ), 2.59 (t,  $J = 6.0$  Hz, 2H,  $\text{CH}_2$ ), 2.14 (s, 3H,  $\text{CH}_3$ ), 1.76–1.70 (m, 9.3 Hz, 4H, 2 $\text{CH}_2$ );  $^{13}\text{C NMR}$  (150 MHz,  $\text{DMSO-}d_6$ ):  $\delta = 199.4, 169.5, 150.7, 149.3, 138.9, 132.4, 129.2, 127.1, 125.4, 121.8, 116.8, 95.8, 41.3, 33.5, 22.9, 21.9, 14.3$ ; HRMS (TOF ES<sup>+</sup>):  $m/z$  calcd for  $\text{C}_{17}\text{H}_{18}\text{N}_3\text{O}$  [(M+H)<sup>+</sup>], 280.1444, found, 280.1441.

**7-Methylbenzo[*f*]chromeno[4,3-*d*]pyrazolo[1,5-*a*][1,3]diazepin-15(9*H*)-one (3x)**

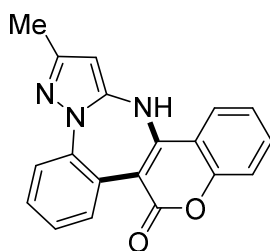

$V_{\text{Petroleum ether}}/V_{\text{Ethyl acetate}} = 5:1$ ,  $R_f = 0.25$ ; Yellow solid: 19 mg (20%); mp = 291–293 °C;  $^1\text{H NMR}$  (600 MHz,  $\text{DMSO-}d_6$ ):  $\delta = 9.13$  (s, 1H, NH), 8.31 (d,  $J = 7.5$  Hz, 1H,

ArH), 7.71 (t,  $J = 7.7$  Hz, 1H, ArH), 7.61 (d,  $J = 8.1$  Hz, 1H, ArH), 7.55 (d,  $J = 7.9$  Hz, 1H, ArH), 7.47–7.44 (m, 2H, ArH), 7.37 (d,  $J = 7.3$  Hz, 1H, ArH), 7.28 (t,  $J = 7.6$  Hz, 1H, ArH), 5.83 (s, 1H, C=CH), 2.18 (s, 3H, CH<sub>3</sub>); <sup>13</sup>C NMR (150 MHz, DMSO-*d*<sub>6</sub>):  $\delta = 161.1, 155.6, 152.4, 151.5, 148.7, 139.1, 133.4, 132.3, 129.2, 125.9, 125.8, 124.8, 123.5, 122.5, 117.3, 115.9, 107.1, 97.6, 14.4$ ; HRMS (TOF ES<sup>+</sup>):  $m/z$  calcd for C<sub>19</sub>H<sub>14</sub>N<sub>3</sub>O<sub>2</sub> [(M+H)<sup>+</sup>], 316.1081, found, 316.1081.

**4-(2-Hydroxy-4,4-dimethyl-6-oxocyclohex-1-en-1-yl)-7,11,11-trimethyl-11,12-dihydro-9H-dibenzo[*d,f*]pyrazolo[1,5-*a*][1,3]diazepin-13(10H)-one (4a)**

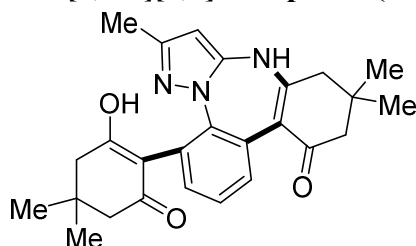

V<sub>Petroleum ether</sub>/V<sub>Ethyl acetate</sub> = 1:3,  $R_f = 0.25$ ; White solid: 155 mg (90%); mp = 318–320 °C; <sup>1</sup>H NMR (600 MHz, DMSO-*d*<sub>6</sub>):  $\delta = 8.44$  (s, 1H, ArH), 7.08 (t,  $J = 7.6$  Hz, 1H, ArH), 7.03 (d,  $J = 7.6$  Hz, 1H, ArH), 6.90 (br, 1H, OH), 5.42 (s, 1H, C=CH), 2.47 (s, 2H, CH<sub>2</sub>), 2.42 (s, 2H, CH<sub>2</sub>), 2.34 (s, 2H, CH<sub>2</sub>), 2.16 (s, 2H, CH<sub>2</sub>), 1.99 (s, 3H, CH<sub>3</sub>), 1.08 (s, 3H, CH<sub>3</sub>), 1.02 (s, 6H, 2CH<sub>3</sub>), 1.00 (s, 3H, CH<sub>3</sub>); <sup>13</sup>C NMR (150 MHz, DMSO-*d*<sub>6</sub>):  $\delta = 195.5, 195.5, 167.2, 149.3, 149.3, 148.3, 138.1, 132.1, 130.2, 130.2, 129.7, 124.8, 115.8, 105.5, 95.2, 50.8, 50.8, 43.9, 43.9, 31.7, 30.3, 29.2, 29.2, 28.4, 25.1, 14.5$ ; HRMS (TOF ES<sup>+</sup>):  $m/z$  calcd for C<sub>26</sub>H<sub>30</sub>N<sub>3</sub>O<sub>3</sub> [(M+H)<sup>+</sup>], 432.2282, found, 432.2273.

**4-(2-Hydroxy-4,4-dimethyl-6-oxocyclohex-1-en-1-yl)-2,7,11,11-tetramethyl-11,12-dihydro-9H-dibenzo[*d,f*]pyrazolo[1,5-*a*][1,3]diazepin-13(10H)-one (4b)**

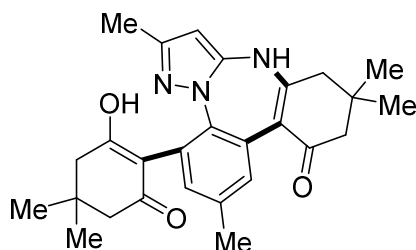

V<sub>Petroleum ether</sub>/V<sub>Ethyl acetate</sub> = 1:2,  $R_f = 0.25$ ; White solid: 167 mg (94%); mp > 330 °C; <sup>1</sup>H NMR (600 MHz, DMSO-*d*<sub>6</sub>):  $\delta = 9.97$  (br, 1H, NH), 8.39 (s, 1H, ArH), 6.84 (s, 1H, ArH), 6.67 (br, 1H, OH), 5.40 (s, 1H, C=CH), 2.50–2.24 (m, 6H, 3CH<sub>2</sub>), 2.21 (s, 3H, ArCH<sub>3</sub>), 2.15 (s, 2H, CH<sub>2</sub>), 1.98 (s, 3H, CH<sub>3</sub>), 1.08 (s, 3H, CH<sub>3</sub>), 1.02 (s, 6H, 2CH<sub>3</sub>), 1.00 (s, 3H, CH<sub>3</sub>); <sup>13</sup>C NMR (150 MHz, DMSO-*d*<sub>6</sub>):  $\delta = 195.5, 195.5, 166.9, 149.0, 149.0, 147.9, 135.8, 133.5, 132.6, 130.6, 129.8, 129.4, 115.9, 106.8, 94.9, 50.9, 50.9, 43.9, 43.9, 31.7, 30.3, 29.3, 28.4, 28.4, 25.5, 20.9, 14.5$ ; HRMS (TOF ES<sup>+</sup>):  $m/z$  calcd for C<sub>27</sub>H<sub>32</sub>N<sub>3</sub>O<sub>3</sub> [(M+H)<sup>+</sup>], 446.2438, found, 446.2446.

**4-(2-Hydroxy-4,4-dimethyl-6-oxocyclohex-1-en-1-yl)-2-methoxy-7,11,11-trimethyl-1,11,12-dihydro-9H-dibenzo[d,f]pyrazolo[1,5-a][1,3]diazepin-13(10H)-one (4c)**

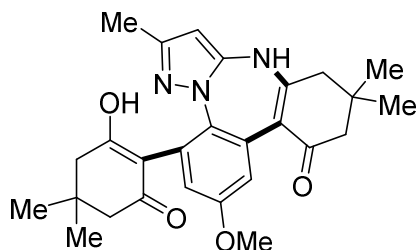

$V_{\text{Petroleum ether}}/V_{\text{Ethyl acetate}} = 1:3$ ,  $R_f = 0.25$ ; White solid: 167 mg (91%); mp > 330 °C;  $^1\text{H}$  NMR (600 MHz,  $\text{DMSO-}d_6$ ):  $\delta = 10.22$  (br, 1H, NH), 8.43 (s, 1H, ArH), 6.60 (s, 1H, ArH), 6.45 (br, 1H, OH), 5.40 (s, 1H, C=CH), 3.67 (s, 3H, ArOCH<sub>3</sub>), 2.47–2.34 (m, 4H, 2CH<sub>2</sub>), 2.16 (s, 4H, 2CH<sub>2</sub>), 1.98 (s, 3H, CH<sub>3</sub>), 1.07 (s, 3H, CH<sub>3</sub>), 1.02 (s, 6H, 2CH<sub>3</sub>), 1.01 (s, 3H, CH<sub>3</sub>);  $^{13}\text{C}$  NMR (150 MHz,  $\text{DMSO-}d_6$ ):  $\delta = 195.4$ , 195.4, 167.2, 155.9, 155.9, 147.7, 147.7, 131.7, 131.1, 130.7, 117.3, 116.2, 115.4, 107.6, 94.9, 55.6, 50.8, 50.8, 43.9, 43.9, 31.7, 30.28, 29.1, 28.8, 28.8, 28.3, 14.5; HRMS (TOF ES<sup>+</sup>): m/z calcd for C<sub>27</sub>H<sub>32</sub>N<sub>3</sub>O<sub>4</sub> [(M+H)<sup>+</sup>], 462.2387, found, 462.2395.

**2-Fluoro-4-(2-hydroxy-4,4-dimethyl-6-oxocyclohex-1-en-1-yl)-7,11,11-trimethyl-1,11,12-dihydro-9H-dibenzo[d,f]pyrazolo[1,5-a][1,3]diazepin-13(10H)-one (4d)**

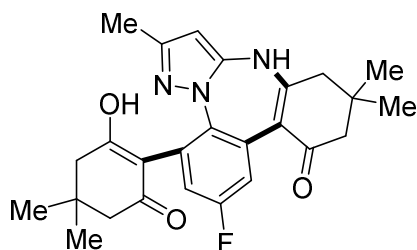

$V_{\text{Petroleum ether}}/V_{\text{Ethyl acetate}} = 1:3$ ,  $R_f = 0.25$ ; White solid: 149 mg (83%); mp > 330 °C;  $^1\text{H}$  NMR (600 MHz,  $\text{DMSO-}d_6$ ):  $\delta = 10.29$  (br, 1H, NH), 8.60 (s, 1H, ArH), 6.86 (d,  $J = 12.5$  Hz, 1H, ArH), 6.72 (br, 1H, OH), 5.43 (s, 1H, C=CH), 2.47 (s, 2H, CH<sub>2</sub>), 2.36 (s, 2H, CH<sub>2</sub>), 2.18 (s, 2H, CH<sub>2</sub>), 2.12–1.89 (m, 5H, CH<sub>2</sub>+CH<sub>3</sub>), 1.08 (s, 3H, CH<sub>3</sub>), 1.00 (s, 9H, 3CH<sub>3</sub>);  $^{13}\text{C}$  NMR (150 MHz,  $\text{DMSO-}d_6$ ):  $\delta = 195.3$ , 195.3, 168.0, 159.02 (d,  $J = 240.4$  Hz), 148.6, 148.6, 148.6, 134.6, 133.4, 132.0 (d,  $J = 9.2$  Hz), 118.3 (d,  $J = 22.0$  Hz), 116.1, 115.9, 107.0, 95.36, 50.7, 50.7, 43.9, 43.9, 31.7, 30.3, 29.2, 29.2, 28.3, 28.3, 14.5; HRMS (TOF ES<sup>+</sup>): m/z calcd for C<sub>26</sub>H<sub>29</sub>FN<sub>3</sub>O<sub>3</sub> [(M+H)<sup>+</sup>], 450.2187, found, 450.2187.

**2-Bromo-4-(2-hydroxy-4,4-dimethyl-6-oxocyclohex-1-en-1-yl)-7,11,11-Trimethyl-1,11,12-dihydro-9H-dibenzo[d,f]pyrazolo[1,5-a][1,3]diazepin-13(10H)-one (4e)**

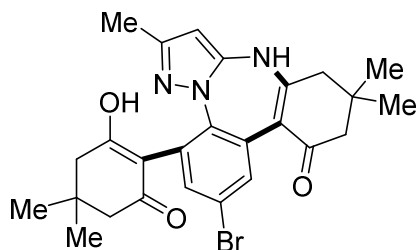

$V_{\text{Petroleum ether}}/V_{\text{Ethyl acetate}} = 1:3$ ,  $R_f = 0.25$ ; White solid: 177 mg (87%); mp > 330 °C;  $^1\text{H}$  NMR (600 MHz,  $\text{DMSO-}d_6$ ):  $\delta = 10.34$  (br, 1H, NH), 8.65 (s, 1H, ArH), 7.19 (s, 1H, ArH), 7.05 (br, 1H, OH), 5.45 (s, 1H, C=CH), 2.46 (s, 2H,  $\text{CH}_2$ ), 2.35 (s, 2H,  $\text{CH}_2$ ), 2.18 (s, 2H,  $\text{CH}_2$ ), 2.09–1.88 (m, 5H,  $\text{CH}_2$ ,  $\text{CH}_3$ ), 1.07 (s, 3H,  $\text{CH}_3$ ), 1.02 (s, 6H, 2 $\text{CH}_3$ ), 1.00 (s, 3H,  $\text{CH}_3$ );  $^{13}\text{C}$  NMR (150 MHz,  $\text{DMSO-}d_6$ ):  $\delta = 195.3$ , 195.3, 168.2, 149.0, 149.0, 149.0, 137.5, 134.1, 132.1, 132.1, 131.9, 123.7, 117.6, 114.3, 95.6, 50.6, 50.6, 43.9, 43.9, 31.7, 30.3, 29.1, 28.3, 28.3, 25.5, 14.5; HRMS (TOF ES<sup>+</sup>): m/z calcd for  $\text{C}_{26}\text{H}_{29}\text{BrN}_3\text{O}_3$  [(M+H)<sup>+</sup>], 510.1387, found, 510.1388.

**4-(2-Hydroxy-4,4-dimethyl-6-oxocyclohex-1-en-1-yl)-7,11,11-trimethyl-13-oxo-10,11,12,13-tetrahydro-9H-dibenzo[d,f]pyrazolo[1,5-a][1,3]diazepine-2-carbonitrile (4f)**

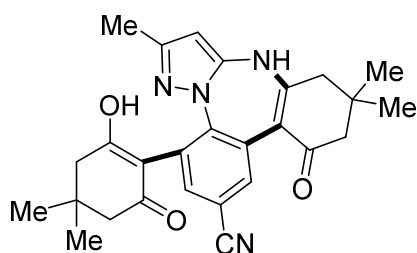

$V_{\text{Petroleum ether}}/V_{\text{Ethyl acetate}} = 1:3$ ,  $R_f = 0.25$ ; White solid: 150 mg (82%); mp > 330 °C;  $^1\text{H}$  NMR (600 MHz,  $\text{DMSO-}d_6$ ):  $\delta = 10.34$  (br, 1H, NH), 8.65 (s, 1H, ArH), 7.19 (s, 1H, ArH), 7.05 (br, 1H, OH), 5.45 (s, 1H, C=CH), 2.5 (d,  $J = 15.2$  Hz, 4H, 2 $\text{CH}_2$ ), 2.3 (s, 4H, 2 $\text{CH}_2$ ), 2.0 (s, 3H,  $\text{CH}_3$ ), 1.1 (s, 3H,  $\text{CH}_3$ ), 1.0 (s, 6H, 2 $\text{CH}_3$ ), 1.0 (s, 3H,  $\text{CH}_3$ );  $^{13}\text{C}$  NMR (150 MHz,  $\text{DMSO-}d_6$ ):  $\delta = 195.2$ , 195.2, 168.4, 150.1, 149.7, 142.2, 137.6, 135.3, 133.7, 131.2, 131.1, 128.2, 119.1, 113.9, 107.8, 96.2, 50.5, 50.5, 43.9, 43.9, 31.7, 30.3, 29.2, 29.2, 28.2, 28.2, 14.5; HRMS (TOF ES<sup>+</sup>): m/z calcd for  $\text{C}_{27}\text{H}_{29}\text{N}_4\text{O}_3$  [(M+H)<sup>+</sup>], 457.2234, found, 457.2244.

**4-(2-Hydroxy-4,4-dimethyl-6-oxocyclohex-1-en-1-yl)-7,11,11-trimethyl-2-(trifluoromethoxy)-11,12-dihydro-9H-dibenzo[d,f]pyrazolo[1,5-a][1,3]diazepin-13(10H)-one (4g)**

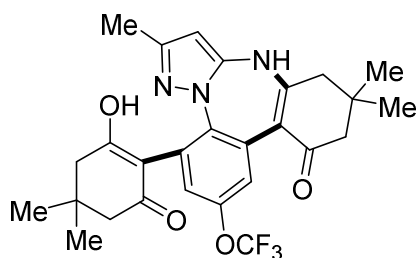

$V_{\text{Petroleum ether}}/V_{\text{Ethyl acetate}} = 1:2$ ,  $R_f = 0.25$ ; White solid: 167 mg (81%); mp > 330 °C;  $^1\text{H}$  NMR (600 MHz, DMSO- $d_6$ ):  $\delta = 10.50$  (br, 1H, NH), 8.69 (s, 1H, ArH), 7.02 (d,  $J = 2.9$  Hz, 1H, ArH), 6.88 (br, 1H, OH), 5.46 (s, 1H, C=CH), 2.48 (s, 2H, CH<sub>2</sub>), 2.37 (s, 2H, CH<sub>2</sub>), 2.24 (s, 2H, CH<sub>2</sub>), 2.10 (s, 2H, CH<sub>2</sub>), 2.00 (s, 3H, CH<sub>3</sub>), 1.08 (s, 3H, CH<sub>3</sub>), 1.00 (s, 9H, 3CH<sub>3</sub>);  $^{13}\text{C}$  NMR (150 MHz, DMSO- $d_6$ ):  $\delta = 195.2$ , 195.2, 168.3, 155.9, 149.2, 149.2, 145.1, 137.2, 131.9, 131.7, 124.0, 122.0, 120.6 (d,  $J = 256.1$  Hz), 106.8, 114.2, 95.7, 50.6, 50.6, 43.9, 43.9, 31.7, 30.3, 28.9, 28.9, 28.6, 28.6, 14.5; HRMS (TOF ES<sup>+</sup>):  $m/z$  calcd for C<sub>27</sub>H<sub>29</sub>F<sub>3</sub>N<sub>3</sub>O<sub>4</sub> [(M+H)<sup>+</sup>], 516.2105, found, 516.2111.

**4-(2-Hydroxy-4,4-dimethyl-6-oxocyclohex-1-en-1-yl)-7,11,11-trimethyl-2-(trifluoromethyl)-11,12-dihydro-9H-dibenzo[*d,f*]pyrazolo[1,5-*a*][1,3]diazepin-13(10H)-one (4h)**

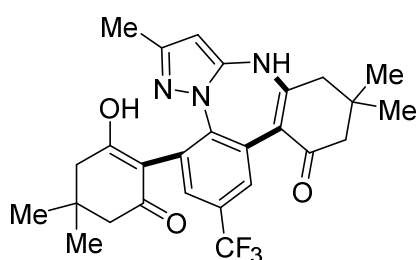

$V_{\text{Petroleum ether}}/V_{\text{Ethyl acetate}} = 1:3$ ,  $R_f = 0.25$ ; White solid: 180 mg (90%); mp > 330 °C;  $^1\text{H}$  NMR (600 MHz, DMSO- $d_6$ ):  $\delta = 10.45$  (br, 1H, NH), 8.72 (s, 1H, ArH), 7.35 (s, 1H, ArH), 7.20 (br, 1H, OH), 5.48 (s, 1H, C=CH), 2.49 (s, 2H, CH<sub>2</sub>), 2.31 (s, 4H, 2CH<sub>2</sub>), 2.11 (s, 2H, CH<sub>2</sub>), 2.01 (s, 3H, CH<sub>3</sub>), 1.09 (s, 3H, CH<sub>3</sub>), 1.03 (s, 6H, 2CH<sub>3</sub>), 1.02 (s, 3H, CH<sub>3</sub>);  $^{13}\text{C}$  NMR (150 MHz, DMSO- $d_6$ ):  $\delta = 195.3$ , 195.3, 168.4, 149.7, 149.6, 141.4, 130.9, 130.9, 129.4, 128.4 ( $J = 3.1$  Hz), 126.6 ( $J = 3.1$  Hz), 125.3 ( $J = 31.5$  Hz), 124.7 ( $J = 270.0$  Hz), 114.39, 105.9, 96.0, 50.6, 50.6, 43.9, 43.9, 31.7, 30.3, 29.1, 29.1, 28.4, 28.4, 14.5; HRMS (TOF ES<sup>+</sup>):  $m/z$  calcd for C<sub>27</sub>H<sub>29</sub>F<sub>3</sub>N<sub>3</sub>O<sub>3</sub> [(M+H)<sup>+</sup>], 500.2156, found, 500.2156.

**4-(2-Hydroxy-4,4-dimethyl-6-oxocyclohex-1-en-1-yl)-11,11-dimethyl-7-(*p*-tolyl)-11,12-dihydro-9H-dibenzo[*d,f*]pyrazolo[1,5-*a*][1,3]diazepin-13(10H)-one (4i)**

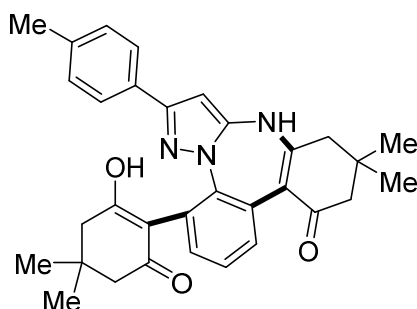

$V_{\text{Petroleum ether}}/V_{\text{Ethyl acetate}} = 1:3$ ,  $R_f = 0.25$ ; White solid: 162 mg (80%); mp = 327–329 °C;  $^1\text{H}$  NMR (600 MHz, DMSO- $d_6$ ):  $\delta = 8.63$  (s, 1H, ArH), 7.57 (d,  $J = 7.0$  Hz, 2H, ArH), 7.20 (d,  $J = 7.5$  Hz, 2H, ArH), 7.15 (t,  $J = 7.6$  Hz, 1H, ArH), 7.09 (d,  $J = 7.6$  Hz, 1H, ArH), 6.96 (br, 1H, OH), 6.00 (s, 1H, C=CH), 2.54 (s, 2H, CH<sub>2</sub>), 2.38 (s, 2H, CH<sub>2</sub>), 2.31 (s, 3H, ArCH<sub>3</sub>), 2.18 (s, 2H, CH<sub>2</sub>), 1.69 (s, 2H, CH<sub>2</sub>), 1.04 (s, 6H, 2CH<sub>3</sub>),

0.94 (s, 3H, CH<sub>3</sub>), 0.78 (s, 3H, CH<sub>3</sub>); <sup>13</sup>C NMR (150 MHz, DMSO-*d*<sub>6</sub>): δ = 195.6, 195.6, 166.9, 150.5, 150.2, 150.2, 138.0, 137.5, 132.1, 130.8, 130.3, 130.1, 129.8, 129.5, 129.5, 125.3, 125.3, 125.1, 125.1, 115.9, 92.1, 50.8, 50.8, 43.9, 43.9, 31.5, 30.4, 27.2, 27.2, 27.2, 25.5, 21.3; HRMS (TOF ES<sup>+</sup>): *m/z* calcd for C<sub>32</sub>H<sub>34</sub>N<sub>3</sub>O<sub>3</sub> [(M+H)<sup>+</sup>], 508.2595, found, 508.2597.

**7-(Furan-2-yl)-4-(2-hydroxy-4,4-dimethyl-6-oxocyclohex-1-en-1-yl)-11,11-dimethyl-11,12-dihydro-9*H*-dibenzo[*d,f*]pyrazolo[1,5-*a*][1,3]diazepin-13(10*H*)-one (4j)**

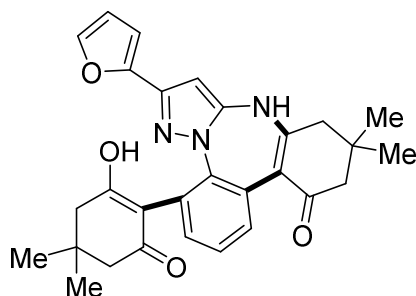

V<sub>Petroleum ether</sub>/V<sub>Ethyl acetate</sub> = 1:3, R<sub>f</sub> = 0.25; White solid: 131 mg (68%); mp = 334–336 °C; <sup>1</sup>H NMR (600 MHz, DMSO-*d*<sub>6</sub>): δ = 8.64 (s, 1H, C=CH), 7.69 (s, 1H, C=CH), 7.16 (d, *J* = 7.7 Hz, 1H, ArH), 7.07 (d, *J* = 8.8 Hz, 1H, ArH), 6.97 (br, 1H, OH), 6.60 (d, *J* = 2.8 Hz, 1H, ArH), 6.55–6.54 (m, 1H, C=CH), 5.86 (s, 1H, C=CH), 2.41 (t, *J* = 20.1 Hz, 4H, 2CH<sub>2</sub>), 2.17 (d, *J* = 16.6 Hz, 2H, CH<sub>2</sub>), 1.85 (d, *J* = 68.0 Hz, 2H, CH<sub>2</sub>), 1.04 (s, 6H, 2CH<sub>3</sub>), 0.97 (s, 3H, CH<sub>3</sub>), 0.89 (s, 3H, CH<sub>3</sub>); <sup>13</sup>C NMR (150 MHz, DMSO-*d*<sub>6</sub>): δ = 195.6, 195.6, 166.9, 150.1, 148.8, 143.5, 142.9, 137.8, 132.2, 130.2, 130.1, 130.1, 129.9, 125.4, 116.1, 111.9, 106.4, 106.4, 92.3, 50.8, 50.8, 43.9, 43.9, 31.5, 30.4, 29.9, 27.5, 27.5, 25.5; HRMS (TOF ES<sup>+</sup>): *m/z* calcd for C<sub>29</sub>H<sub>30</sub>N<sub>3</sub>O<sub>4</sub> [(M+H)<sup>+</sup>], 484.2231, found, 484.2237.

**4-(2-Hydroxy-4,4-dimethyl-6-oxocyclohex-1-en-1-yl)-7,11,11-trimethyl-8-phenyl-11,12-dihydro-9*H*-dibenzo[*d,f*]pyrazolo[1,5-*a*][1,3]diazepin-13(10*H*)-one (4k)**

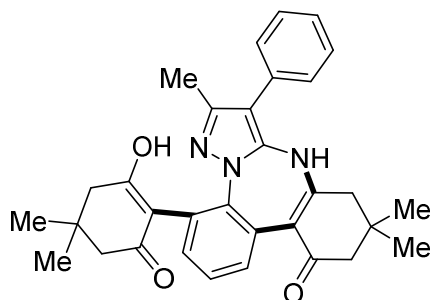

V<sub>Petroleum ether</sub>/V<sub>Ethyl acetate</sub> = 1:2, R<sub>f</sub> = 0.25; White solid: 180 mg (89%); mp = 312–314 °C; <sup>1</sup>H NMR (600 MHz, DMSO-*d*<sub>6</sub>): δ = 7.93 (s, 1H, ArH), 7.46 (d, *J* = 7.5 Hz, 2H, ArH), 7.32–7.28 (m, 3H, ArH), 7.13 (d, *J* = 7.6 Hz, 1H, ArH), 7.08 (d, *J* = 7.1 Hz, 1H, ArH), 6.96 (br, 1H, OH), 2.59 (d, *J* = 14.7 Hz, 2H, CH<sub>2</sub>), 2.47 (s, 4H, 2CH<sub>2</sub>), 2.16 (d, *J* = 16.3 Hz, 2H, CH<sub>2</sub>), 2.02 (s, 3H, CH<sub>3</sub>), 1.13 (s, 3H, CH<sub>3</sub>), 1.08 (s, 3H, CH<sub>3</sub>), 1.03 (s, 3H, CH<sub>3</sub>), 1.00 (s, 3H, CH<sub>3</sub>); <sup>13</sup>C NMR (150 MHz, DMSO-*d*<sub>6</sub>): δ = 195.9, 195.9, 167.6, 146.6, 146.6, 144.4, 137.8, 132.3, 132.1, 130.7, 130.3, 129.8, 129.7, 129.7,

129.1, 129.1, 126.7, 124.9, 116.6, 115.5, 108.9, 50.9, 50.9, 43.5, 43.5, 31.7, 30.4, 29.0, 28.7, 25.5, 19.8, 13.9; HRMS (TOF ES<sup>+</sup>): *m/z* calcd for C<sub>32</sub>H<sub>34</sub>N<sub>3</sub>O<sub>3</sub> [(M+H)<sup>+</sup>], 508.2595, found, 508.2598.

**4-(2-Hydroxy-4,4-dimethyl-6-oxocyclohex-1-en-1-yl)-7,11,11-trimethyl-8-(*p*-tolyl)-11,12-dihydro-9H-dibenzo[*d,f*]pyrazolo[1,5-*a*][1,3]diazepin-13(10*H*)-one (4l)**

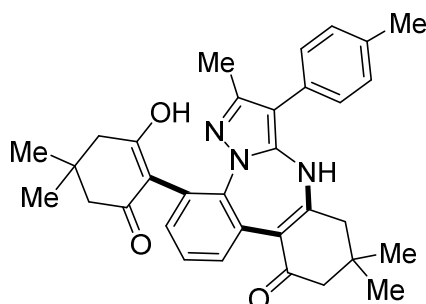

V<sub>Petroleum ether</sub>/V<sub>Ethyl acetate</sub> = 1:2, R<sub>f</sub> = 0.25; White solid: 179 mg (86%); mp > 330 °C; <sup>1</sup>H NMR (600 MHz, DMSO-*d*<sub>6</sub>): δ = 7.87 (d, *J* = 50.8 Hz, 1H, ArH), 7.30–7.24 (m, 2H, ArH), 7.21–7.11 (m, 3H, ArH), 7.08 (d, *J* = 7.8 Hz, 1H, ArH), 6.93 (br, 1H, OH), 2.57 (s, 2H, CH<sub>2</sub>), 2.50 (s, 2H, CH<sub>2</sub>), 2.46–2.29 (m, 5H, CH<sub>3</sub>+CH<sub>2</sub>), 2.22–2.11 (m, 2H, CH<sub>2</sub>), 2.01 (s, 3H, ArCH<sub>3</sub>), 1.11 (s, 3H, CH<sub>3</sub>), 1.09–0.97 (m, 9H, 3CH<sub>3</sub>); <sup>13</sup>C NMR (150 MHz, DMSO-*d*<sub>6</sub>): δ = 195.9, 195.9, 167.6, 146.8, 146.6, 144.5, 137.9, 135.9, 131.9, 130.7, 130.1, 129.9, 129.7, 129.7, 129.7, 129.2, 125.1, 124.8, 116.3, 115.3, 108.9, 50.9, 50.4, 43.5, 43.5, 30.4, 30.4, 29.2, 28.9, 28.4, 25.5, 21.2, 13.8; HRMS (TOF ES<sup>+</sup>): *m/z* calcd for C<sub>33</sub>H<sub>36</sub>N<sub>3</sub>O<sub>3</sub> [(M+H)<sup>+</sup>], 522.2715, found, 522.2759.

**4-(2-Hydroxy-4,4-dimethyl-6-oxocyclohex-1-en-1-yl)-7,11,11-trimethyl-8-(*p*-tolylthio)-11,12-dihydro-9H-dibenzo[*d,f*]pyrazolo[1,5-*a*][1,3]diazepin-13(10*H*)-one (4m)**

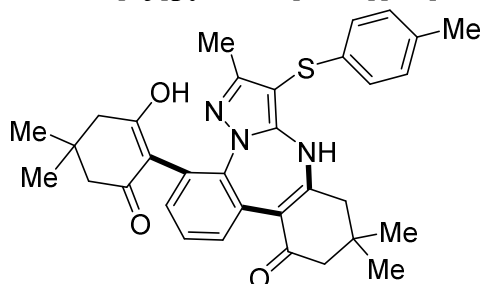

V<sub>Petroleum ether</sub>/V<sub>Ethyl acetate</sub> = 1:3, R<sub>f</sub> = 0.25; White solid: 190 mg (86%); mp = 277–279 °C; <sup>1</sup>H NMR (600 MHz, DMSO-*d*<sub>6</sub>): δ = 8.09 (s, 1H, ArH), 7.18 (t, *J* = 7.8 Hz, 1H, ArH), 7.12–7.08 (m, 3H, ArH), 6.96–6.88 (m, 2H, ArH), 2.56 (s, 2H, CH<sub>2</sub>), 2.35 (s, 2H, CH<sub>2</sub>), 2.25 (s, 3H, ArCH<sub>3</sub>), 2.15 (d, *J* = 15.6 Hz, 2H, CH<sub>2</sub>), 1.95 (s, 5H, CH<sub>3</sub>, CH<sub>2</sub>), 1.08 (s, 3H, CH<sub>3</sub>), 1.04 (s, 3H, CH<sub>3</sub>), 0.95 (s, 6H, 2CH<sub>3</sub>); <sup>13</sup>C NMR (150 MHz, DMSO-*d*<sub>6</sub>): δ = 195.7, 195.7, 167.5, 152.1, 152.1, 152.1, 137.7, 135.3, 135.3, 134.8, 132.3, 130.2, 130.2, 130.1, 129.8, 125.5, 125.5, 125.5, 116.9, 105.6, 93.4, 50.8, 50.8, 43.6, 43.6, 31.8, 30.1, 25.5, 25.5, 25.5, 25.5, 20.9, 12.9; HRMS (TOF ES<sup>+</sup>): *m/z* calcd for C<sub>33</sub>H<sub>36</sub>N<sub>3</sub>O<sub>3</sub>S [(M+H)<sup>+</sup>], 554.2472, found, 554.2476.



**8-((3,5-Dimethylphenyl)thio)-4-(2-hydroxy-4,4-dimethyl-6-oxocyclohex-1-en-1-yl)-7,11,11-trimethyl-11,12-dihydro-9H-dibenzo[d,f]pyrazolo[1,5-a][1,3]diazepin-13(10H)-one (4n)**

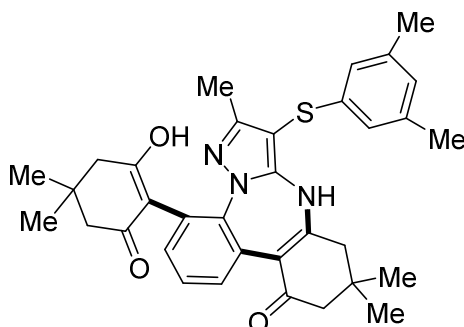

$V_{\text{Petroleum ether}}/V_{\text{Ethyl acetate}} = 1:1$ ,  $R_f = 0.25$ ; White solid: 186 mg (82%); mp = 316–318 °C;  $^1\text{H NMR}$  (600 MHz,  $\text{DMSO-}d_6$ ):  $\delta = 10.41$  (br, 1H, NH), 8.08 (d,  $J = 16.2$  Hz, 1H, ArH), 7.18 (t,  $J = 7.7$  Hz, 1H, ArH), 7.08 (d,  $J = 6.6$  Hz, 1H, ArH), 6.75 (s, 1H, ArH), 6.63 (d,  $J = 56.3$  Hz, 2H), 2.64 (d,  $J = 18.2$  Hz, 2H,  $\text{CH}_2$ ), 2.38 (s, 2H,  $\text{CH}_2$ ), 2.21 (s, 6H, 2 $\text{CH}_3$ ), 2.13 (d,  $J = 32.8$  Hz, 2H,  $\text{CH}_2$ ), 2.02–1.89 (m, 5H,  $\text{CH}_2+\text{CH}_3$ ), 1.07 (s, 3H,  $\text{CH}_3$ ), 1.03 (s, 3H,  $\text{CH}_3$ ), 0.96 (s, 6H, 2 $\text{CH}_3$ );  $^{13}\text{C NMR}$  (150 MHz,  $\text{DMSO-}d_6$ ):  $\delta = 195.6, 193.9, 169.4, 167.5, 152.6, 152.1, 138.6, 137.7, 132.3, 130.2, 130.1, 130.1, 129.6, 127.0, 125.5, 122.8, 122.8, 116.9, 115.8, 106.9, 92.9, 50.8, 50.4, 43.7, 43.6, 31.7, 30.2, 29.2, 28.4, 25.5, 25.5, 21.3, 21.3, 12.9$ ; HRMS (TOF ES<sup>+</sup>):  $m/z$  calcd for  $\text{C}_{34}\text{H}_{38}\text{N}_3\text{O}_3\text{S}$  [(M+H)<sup>+</sup>], 568.2628, found, 568.2629.

**4-(2-Hydroxy-4,4-dimethyl-6-oxocyclohex-1-en-1-yl)-8-((4-methoxyphenyl)thio)-7,11,11-trimethyl-11,12-dihydro-9H-dibenzo[d,f]pyrazolo[1,5-a][1,3]diazepin-13(10H)-one (4o)**

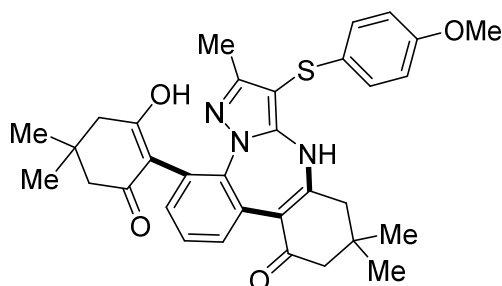

$V_{\text{Petroleum ether}}/V_{\text{Ethyl acetate}} = 1:1$ ,  $R_f = 0.25$ ; White solid: 177 mg (78%); mp = 289–291 °C;  $^1\text{H NMR}$  (600 MHz,  $\text{DMSO-}d_6$ ):  $\delta = 10.40$  (br, 1H, NH), 8.10 (s, 1H, ArH), 7.16 (s, 1H, ArH), 7.08 (d,  $J = 6.6$  Hz, 1H, ArH), 7.00 (s, 2H, ArH), 6.88 (s, 2H,  $\text{CH}_2$ ), 3.71 (s, 3H,  $\text{ArOCH}_3$ ), 2.57 (s, 2H,  $\text{CH}_2$ ), 2.32 (d,  $J = 68.4$  Hz, 2H,  $\text{CH}_2$ ), 2.14 (d,  $J = 16.0$  Hz, 2H,  $\text{CH}_2$ ), 1.97 (d,  $J = 25.0$  Hz, 5H,  $\text{CH}_2+\text{CH}_3$ ), 1.07 (s, 3H,  $\text{CH}_3$ ), 1.03 (s, 3H,  $\text{CH}_3$ ), 0.95 (s, 6H, 2 $\text{CH}_3$ );  $^{13}\text{C NMR}$  (150 MHz,  $\text{DMSO-}d_6$ ):  $\delta = 195.6, 193.9, 167.5, 157.9, 152.3, 151.9, 142.9, 137.7, 132.3, 130.1, 130.1, 129.7, 129.1, 127.4, 125.5, 125.5, 116.8, 115.2, 115.2, 107.9, 94.3, 55.7, 50.8, 50.8, 43.6, 43.6, 31.7, 30.1, 29.2, 28.3, 25.5, 25.5, 12.9$ ; HRMS (TOF ES<sup>+</sup>):  $m/z$  calcd for  $\text{C}_{33}\text{H}_{36}\text{N}_3\text{O}_4\text{S}$  [(M+H)<sup>+</sup>], 570.2421, found, 570.2428.

**8-((4-Fluorophenyl)thio)-4-(2-hydroxy-4,4-dimethyl-6-oxocyclohex-1-en-1-yl)-7,11-trimethyl-11,12-dihydro-9H-dibenzo[*d,f*]pyrazolo[1,5-*a*][1,3]diazepin-13(10*H*)-one (4p)**

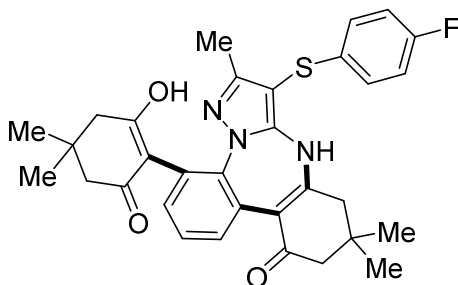

$V_{\text{Petroleum ether}}/V_{\text{Ethyl acetate}} = 1:1$ ,  $R_f = 0.25$ ; White solid: 167 mg (75%); mp = 310–312 °C;  $^1\text{H NMR}$  (600 MHz,  $\text{DMSO-}d_6$ ):  $\delta = 8.14$  (d,  $J = 28.0$  Hz, 1H, ArH), 7.20–7.13 (m, 2H, ArH), 7.10–6.99 (m, 4H, ArH), 2.46 (s, 2H,  $\text{CH}_2$ ), 2.31 (s, 2H,  $\text{CH}_2$ ), 2.13 (s, 2H,  $\text{CH}_2$ ), 2.00–1.81 (m, 5H,  $\text{CH}_2 + \text{CH}_3$ ), 1.03 (s, 6H, 2 $\text{CH}_3$ ), 0.96 (s, 6H, 2 $\text{CH}_3$ );  $^{13}\text{C NMR}$  (150 MHz,  $\text{DMSO-}d_6$ ):  $\delta = 195.7$ , 194.0, 169.5, 167.3, 160.8 (d,  $J = 243.5$  Hz), 152.9, 151.9, 137.8, 134.4, 132.3 (d,  $J = 4.5$  Hz), 132.3 (d,  $J = 4.5$  Hz), 130.1, 129.7, 127.3 (d,  $J = 7.5$  Hz), 127.3 (d,  $J = 7.5$  Hz), 125.6, 116.4 (d,  $J = 21$  Hz), 116.4 (d,  $J = 21$  Hz), 115.7, 106.9, 93.1, 50.7, 50.7, 43.7, 43.7, 31.7, 30.2, 29.2, 28.1, 25.5, 25.5, 12.7; HRMS (TOF ES<sup>+</sup>):  $m/z$  calcd for  $\text{C}_{32}\text{H}_{33}\text{FN}_3\text{O}_3\text{S}$  [(M+H)<sup>+</sup>], 558.2221, found, 558.2230.

**8-((4-Chlorophenyl)thio)-4-(2-hydroxy-4,4-dimethyl-6-oxocyclohex-1-en-1-yl)-7,11-trimethyl-11,12-dihydro-9H-dibenzo[*d,f*]pyrazolo[1,5-*a*][1,3]diazepin-13(10*H*)-one (4q)**

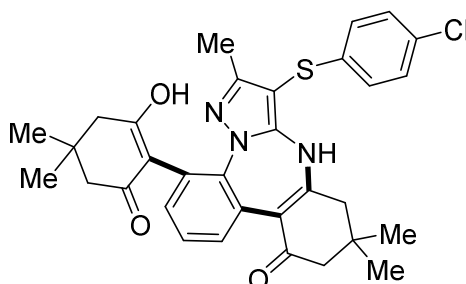

$V_{\text{Petroleum ether}}/V_{\text{Ethyl acetate}} = 1:2$ ,  $R_f = 0.25$ ; White solid: 165 mg (72%); mp = 302–304 °C;  $^1\text{H NMR}$  (600 MHz,  $\text{DMSO-}d_6$ ):  $\delta = 8.16$  (s, 1H, ArH), 7.36 (d,  $J = 6.6$  Hz, 2H, ArH), 7.19 (t,  $J = 7.7$  Hz, 1H, ArH), 7.14–6.95 (m, 3H, ArH), 2.57 (s, 2H,  $\text{CH}_2$ ), 2.30 (s, 2H,  $\text{CH}_2$ ), 2.17 (s, 2H,  $\text{CH}_2$ ), 2.06 (s, 2H,  $\text{CH}_2$ ), 1.95 (s, 3H,  $\text{CH}_3$ ), 1.08 (s, 3H,  $\text{CH}_3$ ), 1.04 (s, 3H,  $\text{CH}_3$ ), 0.96 (s, 6H, 2 $\text{CH}_3$ );  $^{13}\text{C NMR}$  (150 MHz,  $\text{DMSO-}d_6$ ):  $\delta = 195.7$ , 195.7, 167.3, 152.0, 152.0, 152.0, 138.3, 137.7, 132.3, 130.2, 130.1, 130.0, 129.8, 129.4, 127.0, 127.0, 127.0, 125.6, 117.1, 105.5, 92.4, 50.8, 50.8, 43.7, 43.7, 31.8, 30.2, 25.5, 25.5, 25.5, 25.5, 12.8; HRMS (TOF ES<sup>+</sup>):  $m/z$  calcd for  $\text{C}_{32}\text{H}_{33}\text{ClN}_3\text{O}_3\text{S}$  [(M+H)<sup>+</sup>], 574.1926, found, 574.1924.

**8-((4-Bromophenyl)thio)-4-(2-hydroxy-4,4-dimethyl-6-oxocyclohex-1-en-1-yl)-7,11-trimethyl-11,12-dihydro-9H-dibenzo[*d,f*]pyrazolo[1,5-*a*][1,3]diazepin-13(10*H*)-one (4r)**

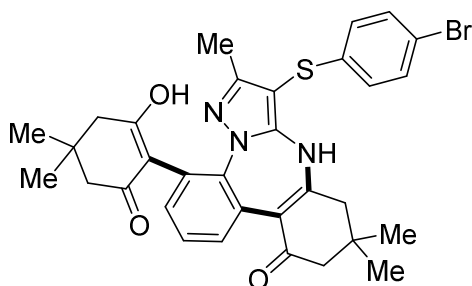

$V_{\text{Petroleum ether}}/V_{\text{Ethyl acetate}} = 1:1$ ,  $R_f = 0.25$ ; White solid: 197 mg (80%); mp = 311–313 °C;  $^1\text{H NMR}$  (600 MHz,  $\text{DMSO-}d_6$ ):  $\delta = 8.17$  (s, 1H, ArH), 7.55–7.42 (m, 2H, ArH), 7.18 (t,  $J = 7.1$  Hz, 1H, ArH), 7.08 (s, 1H, ArH), 7.03–7.00 (m, 1H, ArH), 6.92 (s, 1H, ArH), 2.57 (s, 2H,  $\text{CH}_2$ ), 2.36 (d,  $J = 67.1$  Hz, 2H,  $\text{CH}_2$ ), 2.15 (d,  $J = 15.9$  Hz, 2H,  $\text{CH}_2$ ), 2.07–1.87 (m, 5H,  $\text{CH}_2 + \text{CH}_3$ ), 1.07 (s, 3H,  $\text{CH}_3$ ), 1.03 (s, 3H,  $\text{CH}_3$ ), 0.96 (s, 6H, 2 $\text{CH}_3$ );  $^{13}\text{C NMR}$  (150 MHz,  $\text{DMSO-}d_6$ ):  $\delta = 195.7, 194.1, 167.3, 152.9, 152.1, 152.1, 138.8, 137.8, 132.5, 132.2, 132.1, 130.1, 129.7, 127.4, 127.4, 125.7, 118.2, 117.0, 115.7, 105.2, 92.3, 50.7, 50.7, 43.7, 43.7, 31.7, 30.2, 29.3, 28.1, 25.5, 25.5, 12.8$ ; HRMS (TOF ES+):  $m/z$  calcd for  $\text{C}_{32}\text{H}_{33}\text{BrN}_3\text{O}_3\text{S}$  [(M+H) $^+$ ], 618.1421, found, 618.1430.

**4-(2-Hydroxy-4,4-dimethyl-6-oxocyclohex-1-en-1-yl)-7,11,11-trimethyl-8-((4-nitrophenyl)thio)-11,12-dihydro-9H-dibenzo[d,f]pyrazolo[1,5-a][1,3]diazepin-13(10H)-one (4s)**

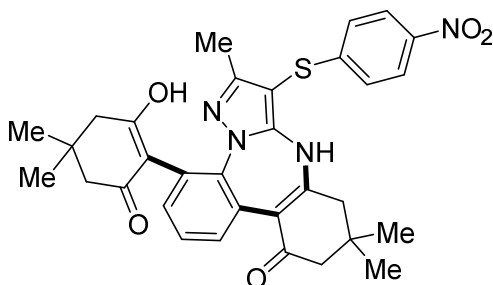

$V_{\text{Petroleum ether}}/V_{\text{Ethyl acetate}} = 1:1$ ,  $R_f = 0.25$ ; White solid: 180 mg (77%); mp = 321–322 °C;  $^1\text{H NMR}$  (600 MHz,  $\text{DMSO-}d_6$ ):  $\delta = 10.52$  (br, 1H, NH), 8.28 (s, 1H, ArH), 8.12 (s, 1H, ArH), 7.35 (d,  $J = 8.5$  Hz, 1H, ArH), 7.21 (t,  $J = 7.7$  Hz, 2H, ArH), 7.16–7.05 (m, 2H, ArH), 2.59 (s, 2H,  $\text{CH}_2$ ), 2.42 (d,  $J = 30.0$  Hz, 2H,  $\text{CH}_2$ ), 2.29–2.06 (m, 4H, 2 $\text{CH}_2$ ), 1.96 (s, 3H,  $\text{CH}_3$ ), 1.09 (s, 3H,  $\text{CH}_3$ ), 1.05 (s, 3H,  $\text{CH}_3$ ), 0.97 (s, 6H, 2 $\text{CH}_3$ );  $^{13}\text{C NMR}$  (150 MHz,  $\text{DMSO-}d_6$ ):  $\delta = 195.8, 194.3, 169.8, 167.2, 153.7, 151.9, 149.7, 145.2, 137.8, 132.4, 130.2, 130.2, 129.7, 125.8, 125.6, 125.6, 124.9, 124.3, 117.3, 115.7, 90.8, 50.7, 50.7, 43.8, 43.8, 31.7, 30.2, 29.4, 28.0, 25.5, 25.5, 12.8$ ; HRMS (TOF ES+):  $m/z$  calcd for  $\text{C}_{32}\text{H}_{33}\text{N}_4\text{O}_5\text{S}$  [(M+H) $^+$ ], 585.2166, found, 585.2172.

**8-((3-Chlorophenyl)thio)-4-(2-hydroxy-4,4-dimethyl-6-oxocyclohex-1-en-1-yl)-7,11,11-trimethyl-11,12-dihydro-9H-dibenzo[d,f]pyrazolo[1,5-a][1,3]diazepin-13(10H)-one (4t)**

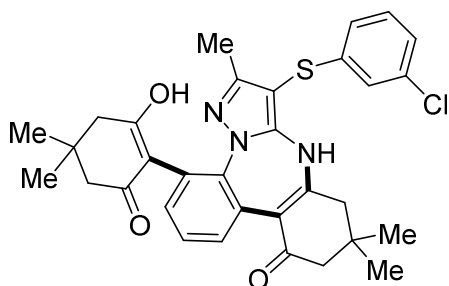

$V_{\text{Petroleum ether}}/V_{\text{Ethyl acetate}} = 1:1$ ,  $R_f = 0.25$ ; White solid: 153 mg (67%); mp = 290–292 °C;  $^1\text{H NMR}$  (600 MHz,  $\text{DMSO-}d_6$ ):  $\delta = 8.23$  (s, 1H, ArH), 7.37–7.28 (m, 1H, ArH), 7.19 (t,  $J = 7.6$  Hz, 2H, ArH), 7.10 (d,  $J = 7.5$  Hz, 2H, ArH), 7.03 (s, 1H, ArH), 2.61 (d,  $J = 17.7$  Hz, 2H,  $\text{CH}_2$ ), 2.41–2.32 (m, 2H,  $\text{CH}_2$ ), 2.17 (d,  $J = 16.1$  Hz, 2H,  $\text{CH}_2$ ), 2.07–1.95 (m, 5H,  $\text{CH}_2 + \text{CH}_3$ ), 1.08 (s, 3H,  $\text{CH}_3$ ), 1.02 (s, 3H,  $\text{CH}_3$ ), 0.96 (s, 6H, 2 $\text{CH}_3$ );  $^{13}\text{C NMR}$  (150 MHz,  $\text{DMSO-}d_6$ ):  $\delta = 195.7, 193.9, 167.3, 152.9, 152.2, 141.8, 137.7, 134.5, 132.3, 131.0, 130.2, 130.1, 129.7, 125.7, 125.4, 124.2, 124.0, 117.0, 115.6, 104.9, 91.8, 50.8, 50.8, 43.8, 43.8, 31.7, 30.2, 29.1, 28.4, 25.5, 25.5, 12.8$ ; HRMS (TOF ES<sup>+</sup>):  $m/z$  calcd for  $\text{C}_{32}\text{H}_{33}\text{ClN}_3\text{O}_3\text{S}$  [(M+H)<sup>+</sup>], 574.1926, found, 574.1933.

**4-(2-Hydroxy-4,4-dimethyl-6-oxocyclohex-1-en-1-yl)-2,7,11,11-tetramethyl-8-(*p*-tolylthio)-11,12-dihydro-9H-dibenzo[*d,f*]pyrazolo[1,5-*a*][1,3]diazepin-13(10H)-one (4u)**

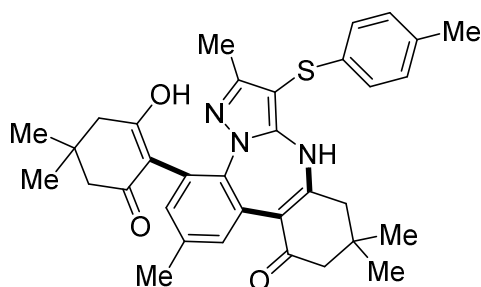

$V_{\text{Petroleum ether}}/V_{\text{Ethyl acetate}} = 1:1$ ,  $R_f = 0.25$ ; White solid: 188 mg (83%); mp = 319–321 °C;  $^1\text{H NMR}$  (600 MHz,  $\text{DMSO-}d_6$ ):  $\delta = 8.05$  (s, 1H, ArH), 7.09 (d,  $J = 7.8$  Hz, 2H, ArH), 6.91 (d,  $J = 29.2$  Hz, 3H, ArH), 2.58 (d,  $J = 18.5$  Hz, 2H,  $\text{CH}_2$ ), 2.43 (d,  $J = 29.7$  Hz, 2H,  $\text{CH}_2$ ), 2.25 (d,  $J = 3.6$  Hz, 6H, 2Ar $\text{CH}_3$ ), 2.13 (d,  $J = 15.8$  Hz, 2H,  $\text{CH}_2$ ), 2.04–1.87 (m, 5H,  $\text{CH}_3 + \text{CH}_2$ ), 1.07 (s, 3H,  $\text{CH}_3$ ), 1.03 (s, 3H,  $\text{CH}_3$ ), 0.95 (s, 6H, 2 $\text{CH}_3$ );  $^{13}\text{C NMR}$  (150 MHz,  $\text{DMSO-}d_6$ ):  $\delta = 195.7, 194.0, 167.3, 152.2, 151.8, 151.8, 135.5, 135.3, 135.3, 134.6, 134.4, 132.8, 130.5, 130.1, 129.9, 129.5, 125.5, 125.5, 116.9, 105.5, 93.1, 50.8, 50.8, 43.6, 43.6, 31.7, 30.2, 28.3, 25.5, 25.5, 25.5, 20.9, 20.8, 12.8$ ; HRMS (TOF ES<sup>+</sup>):  $m/z$  calcd for  $\text{C}_{34}\text{H}_{38}\text{N}_3\text{O}_3\text{S}$  [(M+H)<sup>+</sup>], 568.2628, found, 568.2630.

**4-(2-Hydroxy-4,4-dimethyl-6-oxocyclohex-1-en-1-yl)-2-methoxy-7,11,11-trimethyl-1-8-(*p*-tolylthio)-11,12-dihydro-9H-dibenzo[*d,f*]pyrazolo[1,5-*a*][1,3]diazepin-13(10H)-one (4v)**

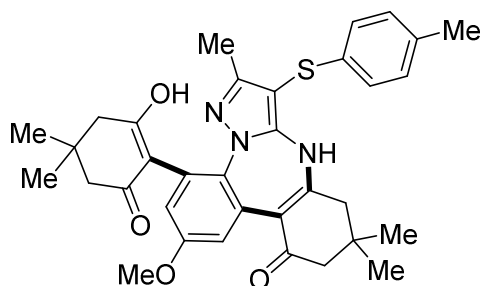

$V_{\text{Petroleum ether}}/V_{\text{Ethyl acetate}} = 1:2$ ,  $R_f = 0.25$ ; White solid: 189 mg (81%); mp = 294–296 °C;  $^1\text{H NMR}$  (600 MHz,  $\text{DMSO-}d_6$ ):  $\delta = 10.44$  (br, 1H, NH), 8.09 (s, 1H, ArH), 7.10 (s, 2H, ArH), 6.98–6.87 (m, 2H, ArH), 6.64 (s, 1H, ArH), 3.71 (s, 3H, OMe), 2.57 (s, 2H, CH<sub>2</sub>), 2.39 (s, 2H, CH<sub>2</sub>), 2.25 (s, 3H, CH<sub>3</sub>), 2.14 (d,  $J = 15.9$  Hz, 2H, CH<sub>2</sub>), 2.01–1.87 (m, 5H, CH<sub>2</sub>+CH<sub>3</sub>), 1.07 (s, 3H, CH<sub>3</sub>), 1.03 (s, 3H, CH<sub>3</sub>), 0.95 (s, 6H, 2CH<sub>3</sub>);  $^{13}\text{C NMR}$  (150 MHz,  $\text{DMSO-}d_6$ ):  $\delta = 195.6, 193.8, 167.6, 156.4, 156.4, 151.7, 151.7, 135.4, 135.4, 135.4, 134.7, 131.2, 130.1, 125.4, 125.4, 125.4, 117.5, 116.7, 115.2, 105.3, 93.0, 55.7, 50.8, 50.8, 43.7, 43.7, 31.7, 30.1, 29.0, 28.5, 25.5, 25.5, 20.9, 12.8$ ; HRMS (TOF ES<sup>+</sup>):  $m/z$  calcd for  $\text{C}_{34}\text{H}_{38}\text{N}_3\text{O}_4\text{S}$  [(M+H)<sup>+</sup>], 584.2578, found, 584.2584.

**2-Fluoro-4-(2-hydroxy-4,4-dimethyl-6-oxocyclohex-1-en-1-yl)-7,11,11-trimethyl-8-(*p*-tolylthio)-11,12-dihydro-9*H*-dibenzo[*d,f*]pyrazolo[1,5-*a*][1,3]diazepin-13(10*H*)-one (4w)**

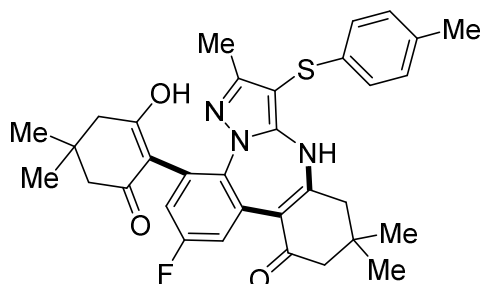

$V_{\text{Petroleum ether}}/V_{\text{Ethyl acetate}} = 1:2$ ,  $R_f = 0.25$ ; White solid: 182 mg (80%); mp = 285–287 °C;  $^1\text{H NMR}$  (600 MHz,  $\text{DMSO-}d_6$ ):  $\delta = 10.68$  (br, 1H, NH), 8.27 (s, 1H, ArH), 7.16–7.08 (m, 2H, ArH), 6.91 (d,  $J = 11.7$  Hz, 3H, ArH), 2.59 (s, 2H, CH<sub>2</sub>), 2.38 (s, 2H, CH<sub>2</sub>), 2.25 (s, 3H, CH<sub>3</sub>), 2.15 (d,  $J = 15.8$  Hz, 2H, CH<sub>2</sub>), 1.97 (d,  $J = 44.5$  Hz, 5H, CH<sub>2</sub>, CH<sub>3</sub>), 1.07 (s, 3H, CH<sub>3</sub>), 1.03 (s, 3H, CH<sub>3</sub>), 0.94 (s, 6H, 2CH<sub>3</sub>);  $^{13}\text{C NMR}$  (150 MHz,  $\text{DMSO-}d_6$ ):  $\delta = 195.5, 193.5, 159.4$  (d,  $J = 241.2$  Hz), 158.6, 152.4, 152.4, 152.1, 135.2, 135.2, 134.8, 134.2, 132.2, 131.9, 130.1 (d,  $J = 7.5$  Hz), 125.5, 125.5, 118.6 (d,  $J = 22.0$  Hz), 116.15 (d,  $J = 23.4$  Hz), 115.8, 105.6, 93.6, 50.6, 50.6, 43.7, 43.7, 31.7, 30.1, 28.4, 28.4, 28.3, 28.3, 20.9, 12.8; HRMS (TOF ES<sup>+</sup>):  $m/z$  calcd for  $\text{C}_{33}\text{H}_{35}\text{FN}_3\text{O}_3\text{S}$  [(M+H)<sup>+</sup>], 572.2378, found, 572.2385.

**4-(2-Hydroxy-4,4-dimethyl-6-oxocyclohex-1-en-1-yl)-7,11,11-trimethyl-13-oxo-8-(*p*-tolylthio)-10,11,12,13-tetrahydro-9*H*-dibenzo[*d,f*]pyrazolo[1,5-*a*][1,3]diazepine-2-carbonitrile (4x)**

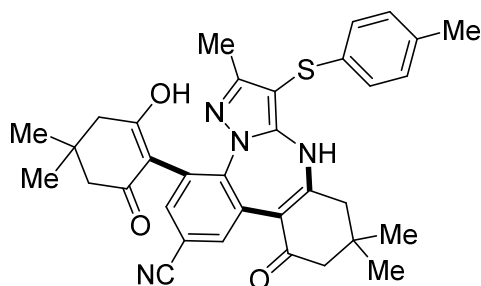

$V_{\text{Petroleum ether}}/V_{\text{Ethyl acetate}} = 1:1$ ,  $R_f = 0.25$ ; White solid: 203 mg (88%); mp > 330 °C;  $^1\text{H}$  NMR (600 MHz,  $\text{DMSO-}d_6$ ):  $\delta = 8.43$  (s, 1H, ArH), 7.52 (s, 1H, ArH), 7.12 (d,  $J = 7.9$  Hz, 2H, ArH), 6.94 (s, 2H, ArH), 2.60 (s, 2H,  $\text{CH}_2$ ), 2.32 (s, 2H,  $\text{CH}_2$ ), 2.25 (s, 3H,  $\text{CH}_3$ ), 2.19 (s, 2H,  $\text{CH}_2$ ), 2.03–1.95 (m, 5H,  $\text{CH}_2 + \text{CH}_3$ ), 1.07 (s, 3H,  $\text{CH}_3$ ), 1.04 (s, 3H,  $\text{CH}_3$ ), 0.95 (s, 6H, 2 $\text{CH}_3$ );  $^{13}\text{C}$  NMR (150 MHz,  $\text{DMSO-}d_6$ ):  $\delta = 195.4$ , 195.4, 168.8, 153.5, 148.7, 141.6, 135.5, 134.8, 133.7, 131.3, 131.3, 130.2, 130.2, 130.2, 130.2, 125.6, 125.6, 118.9, 115.2, 108.6, 106.2, 94.7, 50.5, 50.5, 43.7, 43.7, 31.8, 30.1, 29.2, 28.2, 25.6, 25.6, 20.9, 12.9; HRMS (TOF ES<sup>+</sup>):  $m/z$  calcd for  $\text{C}_{34}\text{H}_{35}\text{N}_4\text{O}_3\text{S}$  [(M+H)<sup>+</sup>], 579.2424, found, 579.2430.

**4-(2-Hydroxy-5,5-dimethyl-6-oxocyclohex-1-en-1-yl)-7,12,12-trimethyl-11,12-dihydro-9H-dibenzo[d,f]pyrazolo[1,5-a][1,3]diazepin-13(10H)-one (4y)**

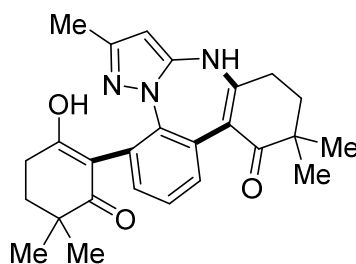

$V_{\text{Petroleum ether}}/V_{\text{Ethyl acetate}} = 1:2$ ,  $R_f = 0.25$ ; White solid: 124 mg (72%); mp > 330 °C;  $^1\text{H}$  NMR (600 MHz,  $\text{DMSO-}d_6$ ):  $\delta = 10.09$  (br, 1H, NH), 8.41 (s, 1H, ArH), 7.05 (t,  $J = 7.6$  Hz, 1H, ArH), 6.87 (d,  $J = 7.7$  Hz, 2H, ArH), 5.39 (s, 1H, C=CH), 2.54 (s, 2H,  $\text{CH}_2$ ), 2.00 (s, 3H,  $\text{CH}_3$ ), 1.72 (s, 4H, 2 $\text{CH}_2$ ), 1.1–0.87 (m, 12H, 4 $\text{CH}_3$ ), 0.77 (s, 2H,  $\text{CH}_2$ );  $^{13}\text{C}$  NMR (150 MHz,  $\text{DMSO-}d_6$ ):  $\delta = 201.1$ , 201.1, 166.4, 149.1, 149.1, 148.2, 138.3, 132.1, 130.8, 130.3, 130.2, 124.8, 115.5, 107.9, 94.7, 34.4, 32.8, 27.1, 27.1, 26.6, 26.6, 25.3, 25.3, 23.9, 23.9, 14.7; HRMS (TOF ES<sup>+</sup>):  $m/z$  calcd for  $\text{C}_{26}\text{H}_{30}\text{N}_3\text{O}_3$  [(M+H)<sup>+</sup>], 432.2282, found, 432.2289.

**4-(2-Hydroxy-4-methyl-6-oxocyclohex-1-en-1-yl)-7,11-dimethyl-11,12-dihydro-9H-dibenzo[d,f]pyrazolo[1,5-a][1,3]diazepin-13(10H)-one (4z)**

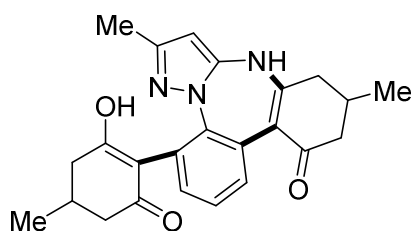

$V_{\text{Petroleum ether}}/V_{\text{Ethyl acetate}} = 1:3$ ,  $R_f = 0.25$ ; Yellow solid: White mg (81%); mp = 317–319 °C;  $^1\text{H NMR}$  (600 MHz,  $\text{DMSO-}d_6$ ):  $\delta = 10.12$  (br, 1H, NH), 8.50 (s, 1H, ArH), 7.07 (t,  $J = 7.5$  Hz, 1H, ArH), 6.99 (d,  $J = 6.0$  Hz, 1H, ArH), 6.85 (br, 1H, OH), 5.40 (s, 1H, C=CH), 2.63 (d,  $J = 17.2$  Hz, 2H,  $\text{CH}_2$ ), 2.42–2.28 (m, 2H,  $\text{CH}_2$ ), 2.17 (s, 2H,  $\text{CH}_2$ ), 2.10 (s, 2H,  $\text{CH}_2$ ), 2.01 (s, 3H,  $\text{CH}_3$ ), 2.00–1.70 (m, 2H, 2CH), 1.01 (d,  $J = 5.7$  Hz, 6H, 2 $\text{CH}_3$ );  $^{13}\text{C NMR}$  (150 MHz,  $\text{DMSO-}d_6$ ):  $\delta = 195.7$ , 195.7, 168.2, 151.4, 149.8, 148.1, 138.2, 131.9, 130.6, 129.8, 129.5, 124.7, 116.7, 105.6, 94.9, 45.8, 45.8, 38.9, 38.9, 27.9, 26.5, 21.7, 21.1, 14.5; HRMS (TOF ES<sup>+</sup>):  $m/z$  calcd for  $\text{C}_{24}\text{H}_{26}\text{N}_3\text{O}_3$  [(M+H)<sup>+</sup>], 404.1969, found, 404.1972.

**4-(2-Hydroxy-6-oxocyclohex-1-en-1-yl)-7-methyl-11,12-dihydro-9H-dibenzo[*d,f*]pyrazolo[1,5-*a*][1,3]diazepin-13(10*H*)-one (4aa)**

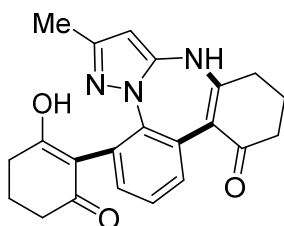

$V_{\text{Petroleum ether}}/V_{\text{Ethyl acetate}} = 1:2$ ,  $R_f = 0.25$ ; White solid: 123 mg (82%); mp = 325–327 °C;  $^1\text{H NMR}$  (600 MHz,  $\text{DMSO-}d_6$ ):  $\delta = 10.15$  (br, 1H, NH), 8.54 (s, 1H, ArH), 7.06 (t,  $J = 7.5$  Hz, 1H, ArH), 6.98 (d,  $J = 7.3$  Hz, 1H, ArH), 6.88 (br, 1H, OH), 5.40 (s, 1H, C=CH), 2.64–2.54 (m, 2H,  $\text{CH}_2$ ), 2.33 (s, 4H, 2 $\text{CH}_2$ ), 2.02 (s, 3H,  $\text{CH}_3$ ), 1.95–1.65 (m, 6H, 3 $\text{CH}_2$ );  $^{13}\text{C NMR}$  (150 MHz,  $\text{DMSO-}d_6$ ):  $\delta = 195.7$ , 195.7, 168.3, 158.7, 149.7, 148.1, 138.2, 131.9, 130.7, 129.8, 129.6, 124.6, 116.9, 104.4, 94.8, 37.6, 37.6, 30.8, 30.8, 20.7, 19.3, 14.4; HRMS (TOF ES<sup>+</sup>):  $m/z$  calcd for  $\text{C}_{22}\text{H}_{22}\text{N}_3\text{O}_3$  [(M+H)<sup>+</sup>], 376.1656, found, 376.1660.

**(*E*)-7,11,11-trimethyl-11,12-dihydro-9H-dibenzo[*d,f*]pyrazolo[1,5-*a*][1,3]diazepin-13(10*H*)-one oxime (5)**

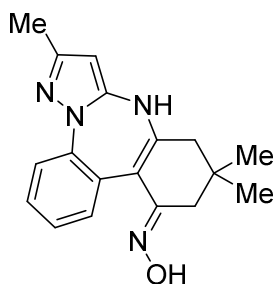

$V_{\text{Petroleum ether}}/V_{\text{Ethyl acetate}} = 3:1$ ,  $R_f = 0.25$ ; Yellow solid: 71 mg (92%); mp = 275–178 °C;  $^1\text{H NMR}$  (600 MHz,  $\text{DMSO-}d_6$ ):  $\delta = 10.56$  (s, 1H, NH), 7.71 (s, 1H, ArH), 7.44 (d,  $J = 7.9$  Hz, 1H, ArH), 7.32 (d,  $J = 7.7$  Hz, 1H, ArH), 7.18 (t,  $J = 7.3$  Hz, 1H, ArH), 7.09 (t,  $J = 7.2$  Hz, 1H, ArH), 5.47 (s, 1H, C=CH), 2.38 (s, 2H,  $\text{CH}_2$ ), 2.18 (s, 2H,  $\text{CH}_2$ ), 2.12 (s, 3H,  $\text{CH}_3$ ), 0.99 (s, 6H, 2 $\text{CH}_3$ );  $^{13}\text{C NMR}$  (150 MHz,  $\text{DMSO-}d_6$ ):  $\delta = 154.8$ , 152.3, 150.8, 150.7, 139.7, 132.8, 128.8, 127.1, 124.7, 122.4, 112.3, 94.2, 43.4, 36.4, 36.4, 29.3, 29.3, 14.4; HRMS (TOF ES<sup>+</sup>):  $m/z$  calcd for  $\text{C}_{18}\text{H}_{21}\text{N}_4\text{O}$  [(M+H)<sup>+</sup>], 309.1710, found, 309.1706.

**Ethyl 2-(7,11,11-trimethyl-13-oxo-10,11,12,13-tetrahydro-9H-dibenzo[*d,f*]pyrazolo[1,5-*a*][1,3]diazepin-9-yl)acetate (6)**

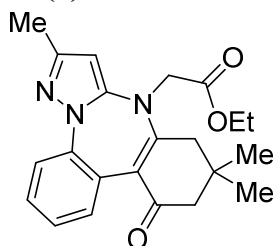

$V_{\text{Petroleum ether}}/V_{\text{Ethyl acetate}} = 5:1$ ,  $R_f = 0.25$ ; Yellow solid: 79 mg (83%); mp = 213–316 °C;  $^1\text{H NMR}$  (600 MHz,  $\text{DMSO-}d_6$ ):  $\delta = 7.50$  (d,  $J = 8.0$  Hz, 1H, ArH), 7.31 (t,  $J = 7.4$  Hz, 1H, ArH), 7.22 (t,  $J = 7.4$  Hz, 1H, ArH), 7.16 (d,  $J = 7.7$  Hz, 1H, ArH), 5.81 (s, 1H, C=CH), 4.55 (d,  $J = 17.9$  Hz, 1H, OCH<sub>2</sub>), 4.40 (d,  $J = 17.8$  Hz, 1H, OCH<sub>2</sub>), 4.10–4.03 (m, 2H, CH<sub>2</sub>), 2.64 (d,  $J = 18.1$  Hz, 1H, CH<sub>2</sub>), 2.45 (d,  $J = 18.0$  Hz, 1H, CH<sub>2</sub>), 2.32 (d,  $J = 33.3$  Hz, 2H, CH<sub>2</sub>), 2.16 (s, 3H, CH<sub>3</sub>), 1.10 (t,  $J = 7.0$  Hz, 3H, CH<sub>3</sub>), 1.03 (s, 3H, CH<sub>3</sub>), 1.02 (s, 3H, CH<sub>3</sub>);  $^{13}\text{C NMR}$  (150 MHz,  $\text{DMSO-}d_6$ ):  $\delta = 196.5$ , 169.3, 166.8, 151.7, 150.6, 138.6, 132.1, 128.1, 126.9, 125.2, 122.0, 120.0, 96.8, 61.3, 51.3, 50.9, 41.1, 31.3, 29.4, 26.6, 14.4, 14.4; HRMS (TOF ES<sup>+</sup>):  $m/z$  calcd for  $\text{C}_{22}\text{H}_{26}\text{N}_3\text{O}_3$  [(M+H)<sup>+</sup>], 380.1969, found, 380.1967.

**9-Benzyl-7,11,11-trimethyl-11,12-dihydro-9H-dibenzo[*d,f*]pyrazolo[1,5-*a*][1,3]diazepin-13(10*H*)-one (7)**

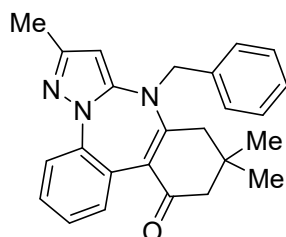

$V_{\text{Petroleum ether}}/V_{\text{Ethyl acetate}} = 5:1$ ,  $R_f = 0.25$ ; Yellow solid: 67 mg (70%); mp = 248–250 °C;  $^1\text{H NMR}$  (600 MHz,  $\text{DMSO-}d_6$ ):  $\delta = 7.52$  (d,  $J = 7.9$  Hz, 1H, ArH), 7.36 (d,  $J = 7.1$  Hz, 1H, ArH), 7.27 (d,  $J = 7.2$  Hz, 1H, ArH), 7.23 (d,  $J = 7.5$  Hz, 3H, ArH), 7.18 (s, 1H, ArH), 7.13 (d,  $J = 7.2$  Hz, 2H, ArH), 5.91 (s, 1H, C=CH), 4.92 (s, 1H, ArCH<sub>2</sub>), 4.62 (d,  $J = 15.4$  Hz, 1H, ArCH<sub>2</sub>), 2.65 (d,  $J = 18.0$  Hz, 1H, CH<sub>2</sub>), 2.52 (s, 1H, CH<sub>2</sub>), 2.29 (d,  $J = 25.1$  Hz, 2H, CH<sub>2</sub>), 2.15 (s, 3H, CH<sub>3</sub>), 0.94 (s, 3H, CH<sub>3</sub>), 0.71 (s, 3H, CH<sub>3</sub>);  $^{13}\text{C NMR}$  (150 MHz,  $\text{DMSO-}d_6$ ):  $\delta = 196.5$ , 167.5, 152.3, 150.6, 138.7, 137.9, 131.9, 128.9, 128.9, 128.4, 127.7, 127.3, 127.3, 126.7, 125.3, 121.9, 121.7, 96.9, 52.7, 51.0, 40.9, 31.5, 29.1, 26.3, 14.5; HRMS (TOF ES<sup>+</sup>):  $m/z$  calcd for  $\text{C}_{25}\text{H}_{26}\text{N}_3\text{O}$  [(M+H)<sup>+</sup>], 384.2070, found, 384.2066.

**6-Hydroxy-4,4-dimethyl-2'-(1*H*-pyrazol-1-yl)-4,5-dihydro-[1,1'-biphenyl]-2(3*H*)-one (9a)**



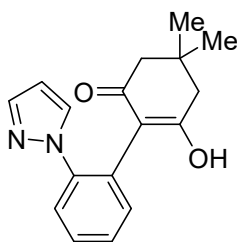

$V_{\text{Petroleum ether}}/V_{\text{Ethyl acetate}} = 1:3$ ,  $R_f = 0.25$ ; White solid: 128 mg (91%); mp = 185–187 °C;  $^1\text{H NMR}$  (500 MHz,  $\text{DMSO-}d_6$ ):  $\delta = 10.52$  (br, 1H, OH), 7.52 (d,  $J = 2.2$  Hz, 1H, N-CH), 7.47 (d,  $J = 1.4$  Hz, 1H, N=CH), 7.35–7.33 (m, 1H, ArH), 7.31–7.28 (m, 1H, ArH), 7.27–7.23 (m, 1H, ArH), 7.03–7.02 (m, 1H, ArH), 6.24 (s, 1H, C=CH), 2.21 (s, 2H,  $\text{CH}_2$ ), 2.09 (s, 2H,  $\text{CH}_2$ ), 0.94 (s, 3H,  $\text{CH}_3$ ), 0.85 (s, 3H,  $\text{CH}_3$ );  $^{13}\text{C NMR}$  (150 MHz,  $\text{DMSO-}d_6$ ):  $\delta = 196.0, 171.5, 140.6, 140.1, 133.5, 130.4, 129.7, 128.1, 127.5, 125.4, 113.6, 106.4, 50.0, 43.7, 31.9, 28.9, 28.1$ ; HRMS (TOF ES<sup>+</sup>):  $m/z$  calcd for  $\text{C}_{17}\text{H}_{19}\text{N}_2\text{O}_2$  [(M+H)<sup>+</sup>], 283.1441, found, 283.1448.

**6-Hydroxy-2'-(1H-indazol-1-yl)-4,4-dimethyl-4,5-dihydro-[1,1'-biphenyl]-2(3H)-one (9b)**

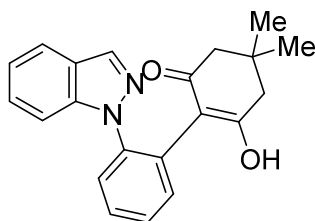

$V_{\text{Petroleum ether}}/V_{\text{Ethyl acetate}} = 1:5$ ,  $R_f = 0.25$ ; White solid: 141 mg (85%); mp = 224–226 °C;  $^1\text{H NMR}$  (500 MHz,  $\text{DMSO-}d_6$ ):  $\delta = 10.38$  (br, 1H, OH), 8.08 (s, 1H, N=CH), 7.69 (d,  $J = 8.0$  Hz, 1H, ArH), 7.37 (d,  $J = 5.9$  Hz, 3H, ArH), 7.24–7.17 (m, 3H, ArH), 7.06 (t,  $J = 7.1$  Hz, 1H, ArH), 2.09 (s, 2H,  $\text{CH}_2$ ), 1.77 (s, 2H,  $\text{CH}_2$ ), 0.85 (s, 3H,  $\text{CH}_3$ ), 0.51 (s, 3H,  $\text{CH}_3$ );  $^{13}\text{C NMR}$  (150 MHz,  $\text{DMSO-}d_6$ ):  $\delta = 195.4, 171.1, 139.8, 139.2, 134.3, 133.9, 131.9, 127.9, 127.7, 126.9, 126.5, 124.1, 121.1, 121.1, 113.4, 110.9, 50.5, 43.1, 31.5, 29.1, 27.4$ ; HRMS (TOF ES<sup>+</sup>):  $m/z$  calcd for  $\text{C}_{21}\text{H}_{21}\text{N}_2\text{O}_2$  [(M+H)<sup>+</sup>], 333.1598, found, 333.1599.

5. X-ray Structure and Data<sup>3</sup> of 3j (CCDC 2292416) and 4r (CCDC 2292417).

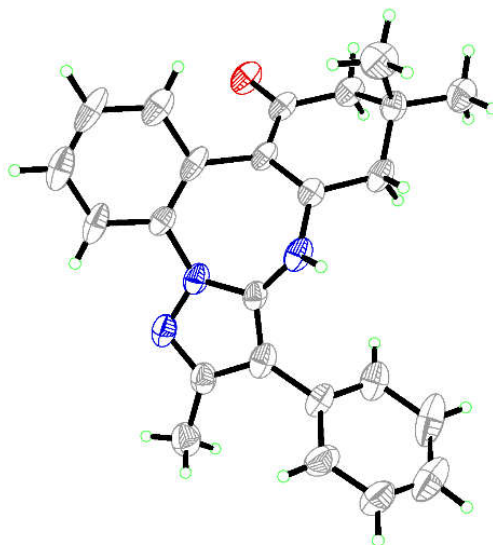

Figure S2 X-Ray crystal structure of 3j.

Table S2 Crystal data and structure refinement for 3j.

|                                   |                                                                                                                         |
|-----------------------------------|-------------------------------------------------------------------------------------------------------------------------|
| Empirical formula                 | C <sub>24</sub> H <sub>23</sub> N <sub>3</sub> O                                                                        |
| Formula weight                    | 369.45                                                                                                                  |
| Temperature                       | 296.15 K                                                                                                                |
| Crystal system, space group       | Monoclinic, P2(1)/c                                                                                                     |
| Unit cell dimensions              | a = 6.459(3) Å      alpha = 90 deg.<br>b = 26.872(12) Å    beta = 98.252(9) deg.<br>c = 13.342(5) Å     gamma = 90 deg. |
| Volume                            | 2291.7(17) Å <sup>3</sup>                                                                                               |
| Z, Calculated density             | 4, 1.071 Mg/m <sup>3</sup>                                                                                              |
| Absorption coefficient            | 0.067 mm <sup>-1</sup>                                                                                                  |
| F(000)                            | 784.0                                                                                                                   |
| Theta range for data collection   | 6.356 to 49.994 deg.                                                                                                    |
| Limiting indices                  | -7<=h<=7, -31<=k<=31, -15<=l<=14                                                                                        |
| Reflections collected / unique    | 11541 / 4024 [R(int) = 0.0922]                                                                                          |
| Data/restraints/parameters        | 4024 / 0 / 256                                                                                                          |
| Goodness-of-fit on F <sup>2</sup> | 0.917                                                                                                                   |
| Final R indices [I>2sigma(I)]     | R1 = 0.0755, wR2 = 0.1935                                                                                               |
| R indices (all data)              | R1 = 0.1607, wR2 = 0.2423                                                                                               |
| Largest diff. peak and hole       | 0.25 and -0.213 e.Å <sup>-3</sup>                                                                                       |

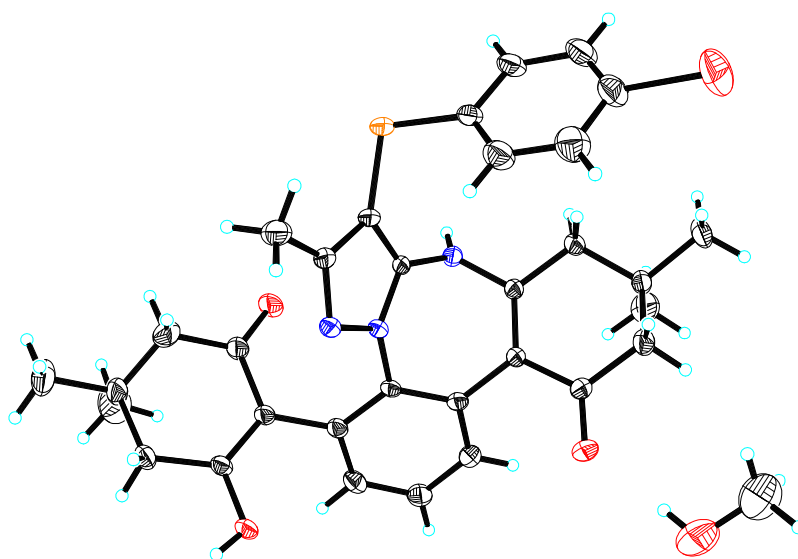

**Figure S3 X-Ray crystal structure of 4r.**

**Table S3** Crystal data and structure refinement for **4r**.

|                                      |                                                                                                                                                                                                 |
|--------------------------------------|-------------------------------------------------------------------------------------------------------------------------------------------------------------------------------------------------|
| Empirical formula                    | $C_{33}H_{36}BrN_3O_4S$                                                                                                                                                                         |
| Formula weight                       | 650.62                                                                                                                                                                                          |
| Temperature                          | 296.15 K                                                                                                                                                                                        |
| Crystal system, space group          | triclinic, P-1                                                                                                                                                                                  |
| Unit cell dimensions                 | $a = 9.915(3) \text{ \AA}$ $\alpha = 113.225(5) \text{ deg.}$<br>$b = 13.033(4) \text{ \AA}$ $\beta = 97.316(5) \text{ deg.}$<br>$c = 14.176(4) \text{ \AA}$ $\gamma = 101.109(6) \text{ deg.}$ |
| Volume                               | $1609.4(8) \text{ \AA}^3$                                                                                                                                                                       |
| Z, Calculated density                | 2, 1.343 $\text{Mg/m}^3$                                                                                                                                                                        |
| Absorption coefficient               | $1.382 \text{ mm}^{-1}$                                                                                                                                                                         |
| F(000)                               | 676.0                                                                                                                                                                                           |
| Theta range for data collection      | 5.442 to 55.206 deg.                                                                                                                                                                            |
| Limiting indices                     | $-11 \leq h \leq 12$ , $-15 \leq k \leq 16$ , $-18 \leq l \leq 17$                                                                                                                              |
| Reflections collected / unique       | 9823 / 7049 [ $R(\text{int}) = 0.0209$ ]                                                                                                                                                        |
| Data/restraints/parameters           | 7049 / 0 / 387                                                                                                                                                                                  |
| Goodness-of-fit on $F^2$             | 1.009                                                                                                                                                                                           |
| Final R indices [ $I > 2\sigma(I)$ ] | $R1 = 0.0604$ , $wR2 = 0.1434$                                                                                                                                                                  |
| R indices (all data)                 | $R1 = 0.1135$ , $wR2 = 0.1691$                                                                                                                                                                  |
| Largest diff. peak and hole          | 0.78 and $-0.84 \text{ e.\AA}^{-3}$                                                                                                                                                             |

**6.  $^1\text{H}$  NMR and  $^{13}\text{C}$  NMR spectra for spectroscopic data.**

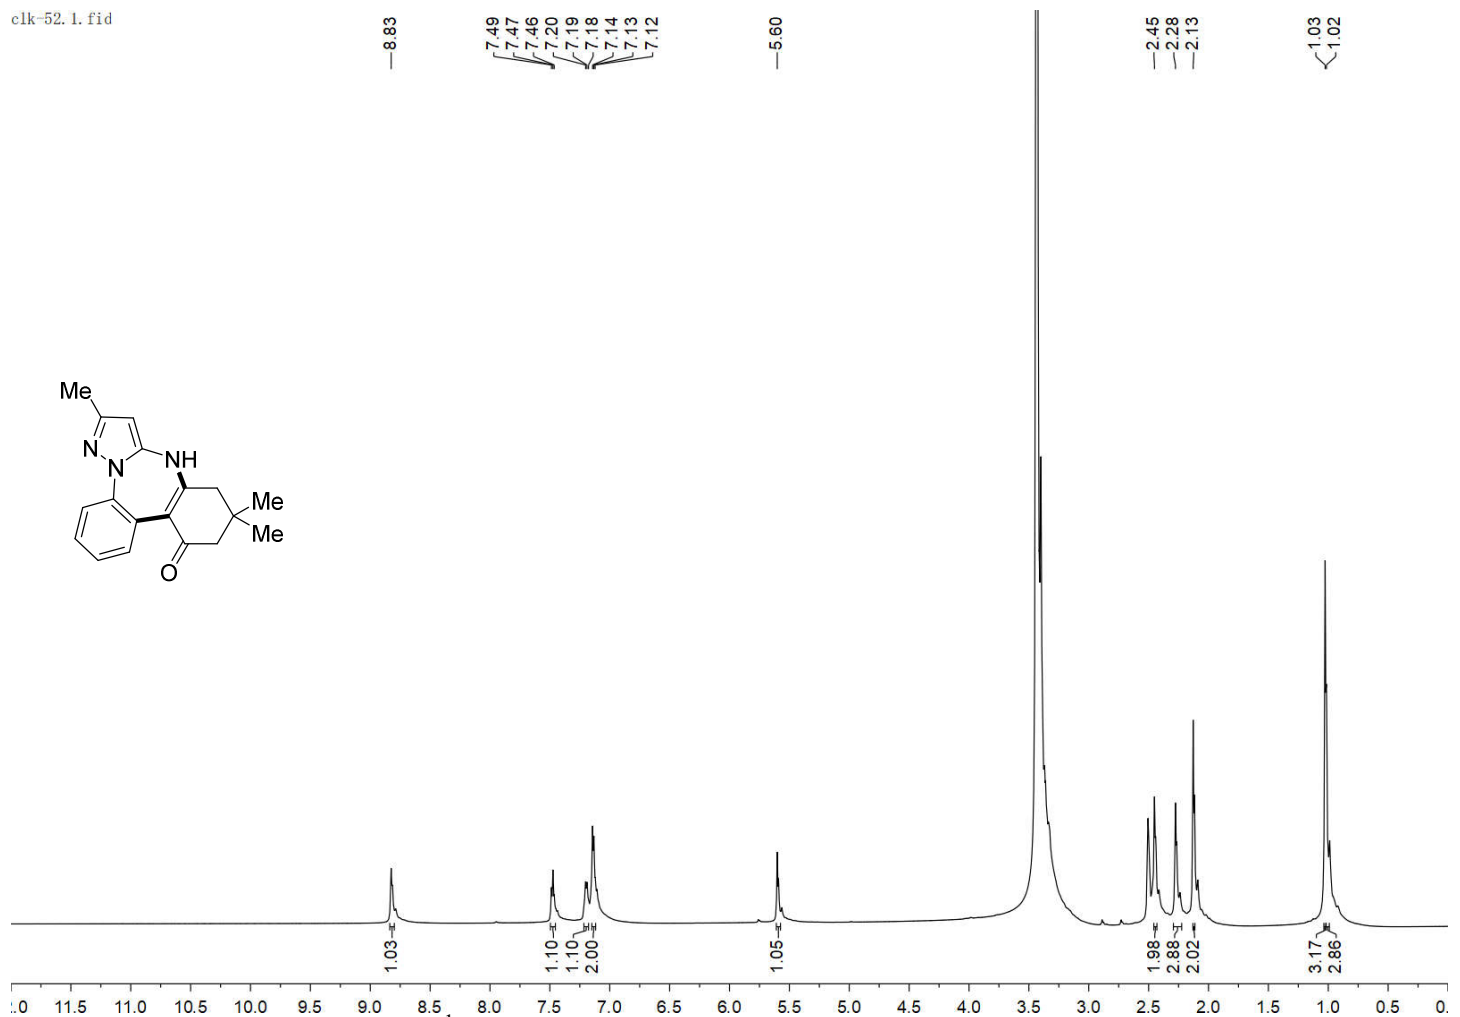

Figure S4. <sup>1</sup>H NMR (600 MHz, DMSO-*d*<sub>6</sub>) spectra of compound **3a**

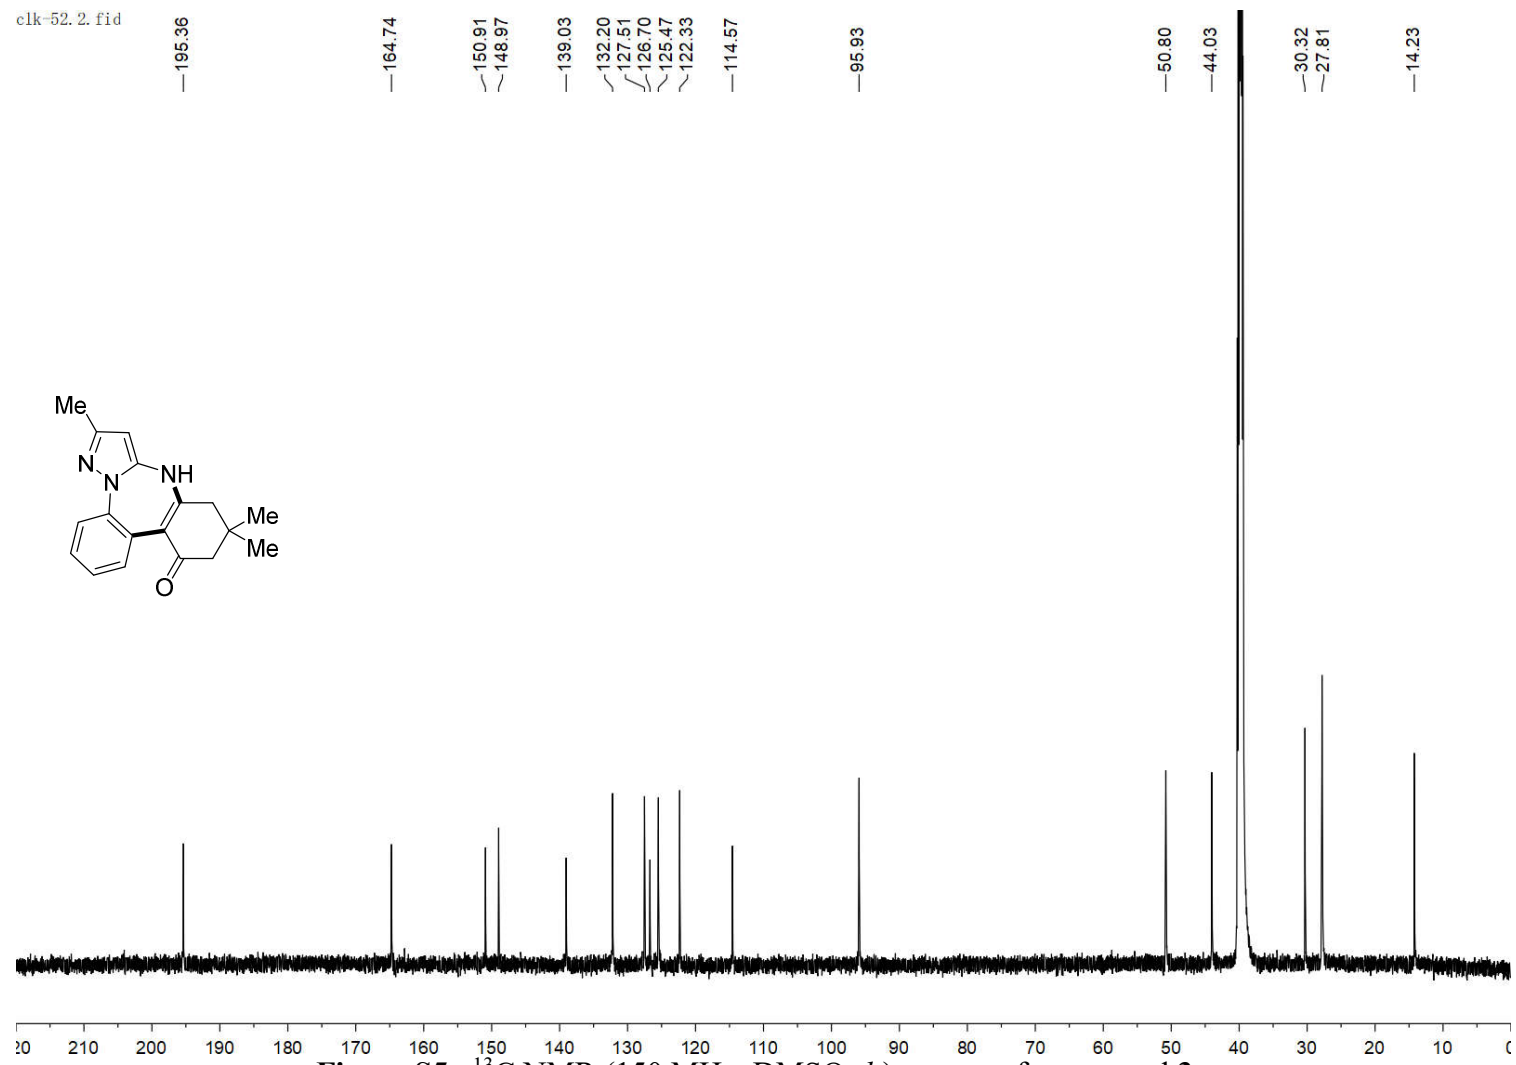

clk-62.1.fid

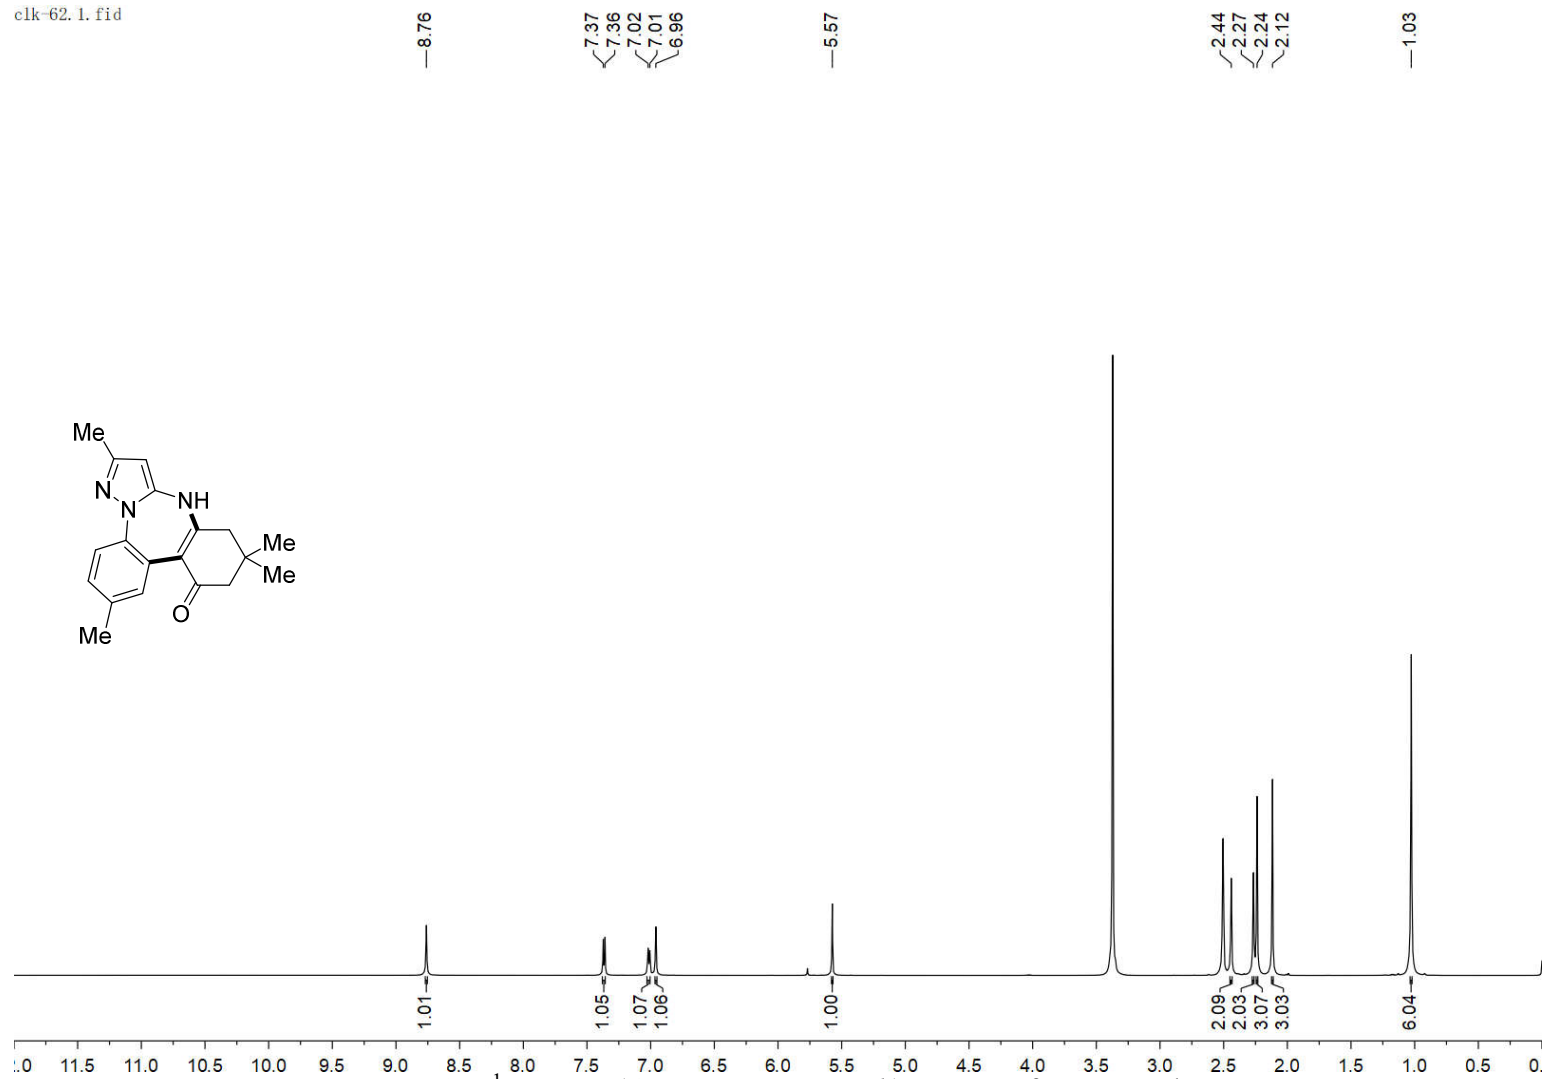

Figure S6. <sup>1</sup>H NMR (600 MHz, DMSO-*d*<sub>6</sub>) spectra of compound **3b**

clk-62.2.fid

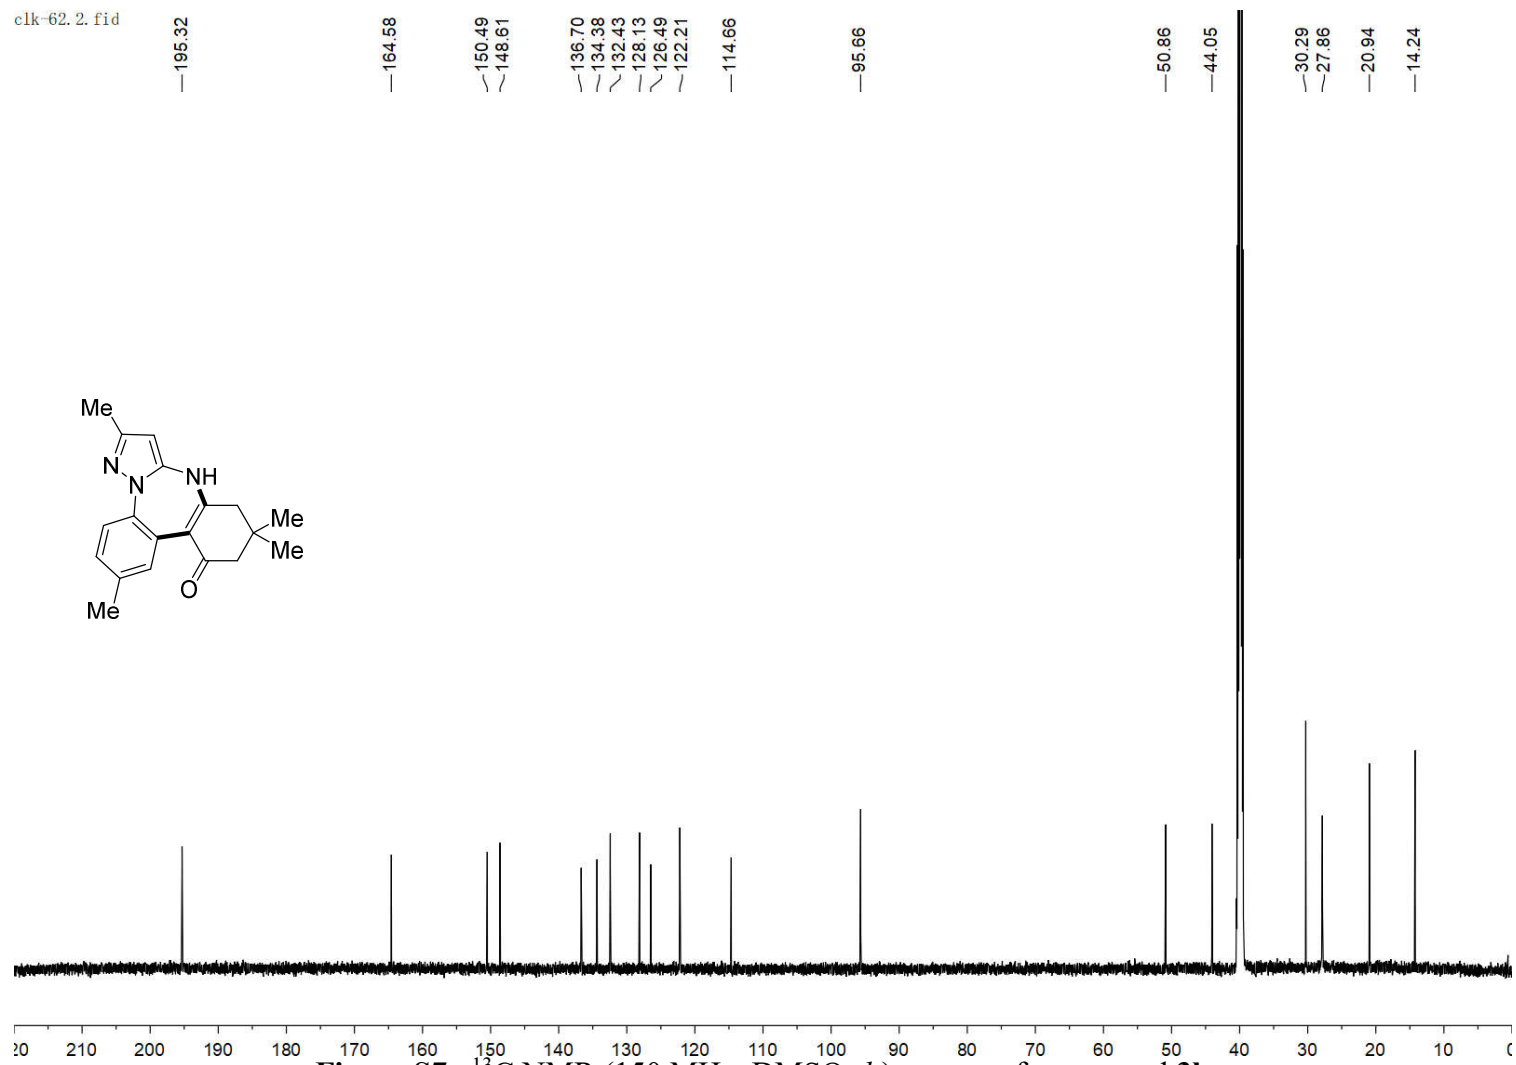

Figure S7.  $^{13}\text{C}$  NMR (150 MHz,  $\text{DMSO-}d_6$ ) spectra of compound **3b**



clk-73.1.fid

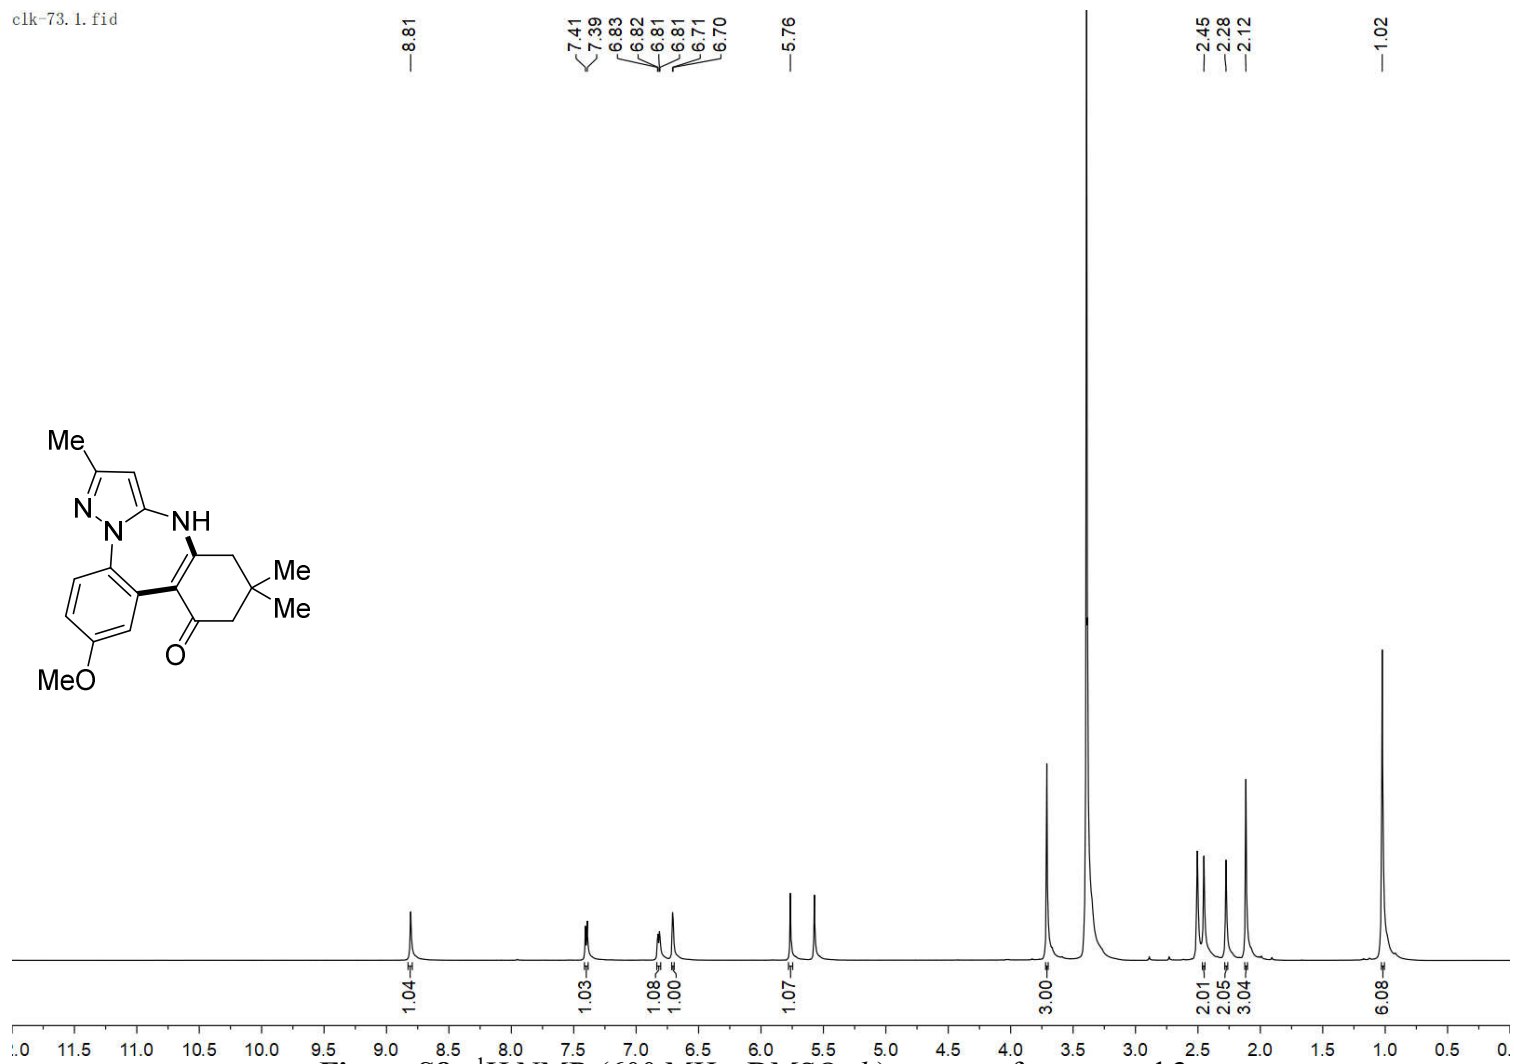

clk-73.2.fid

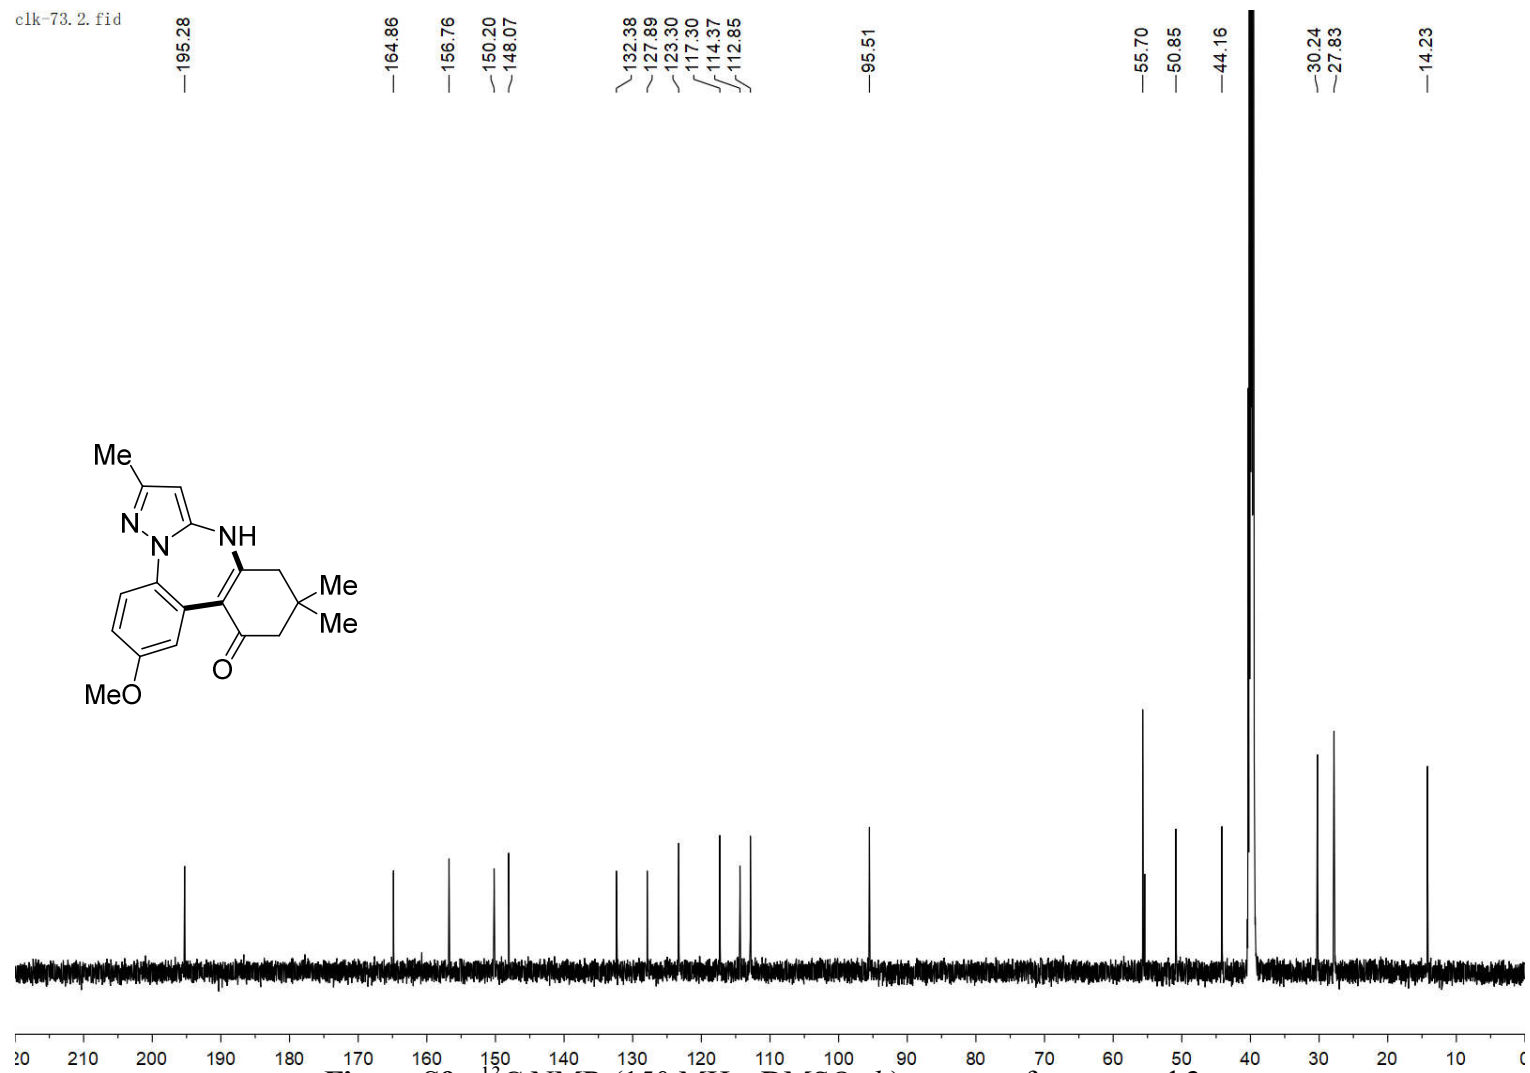

Figure S9.  $^{13}\text{C}$  NMR (150 MHz,  $\text{DMSO-}d_6$ ) spectra of compound 3c

clk-64.1.fid

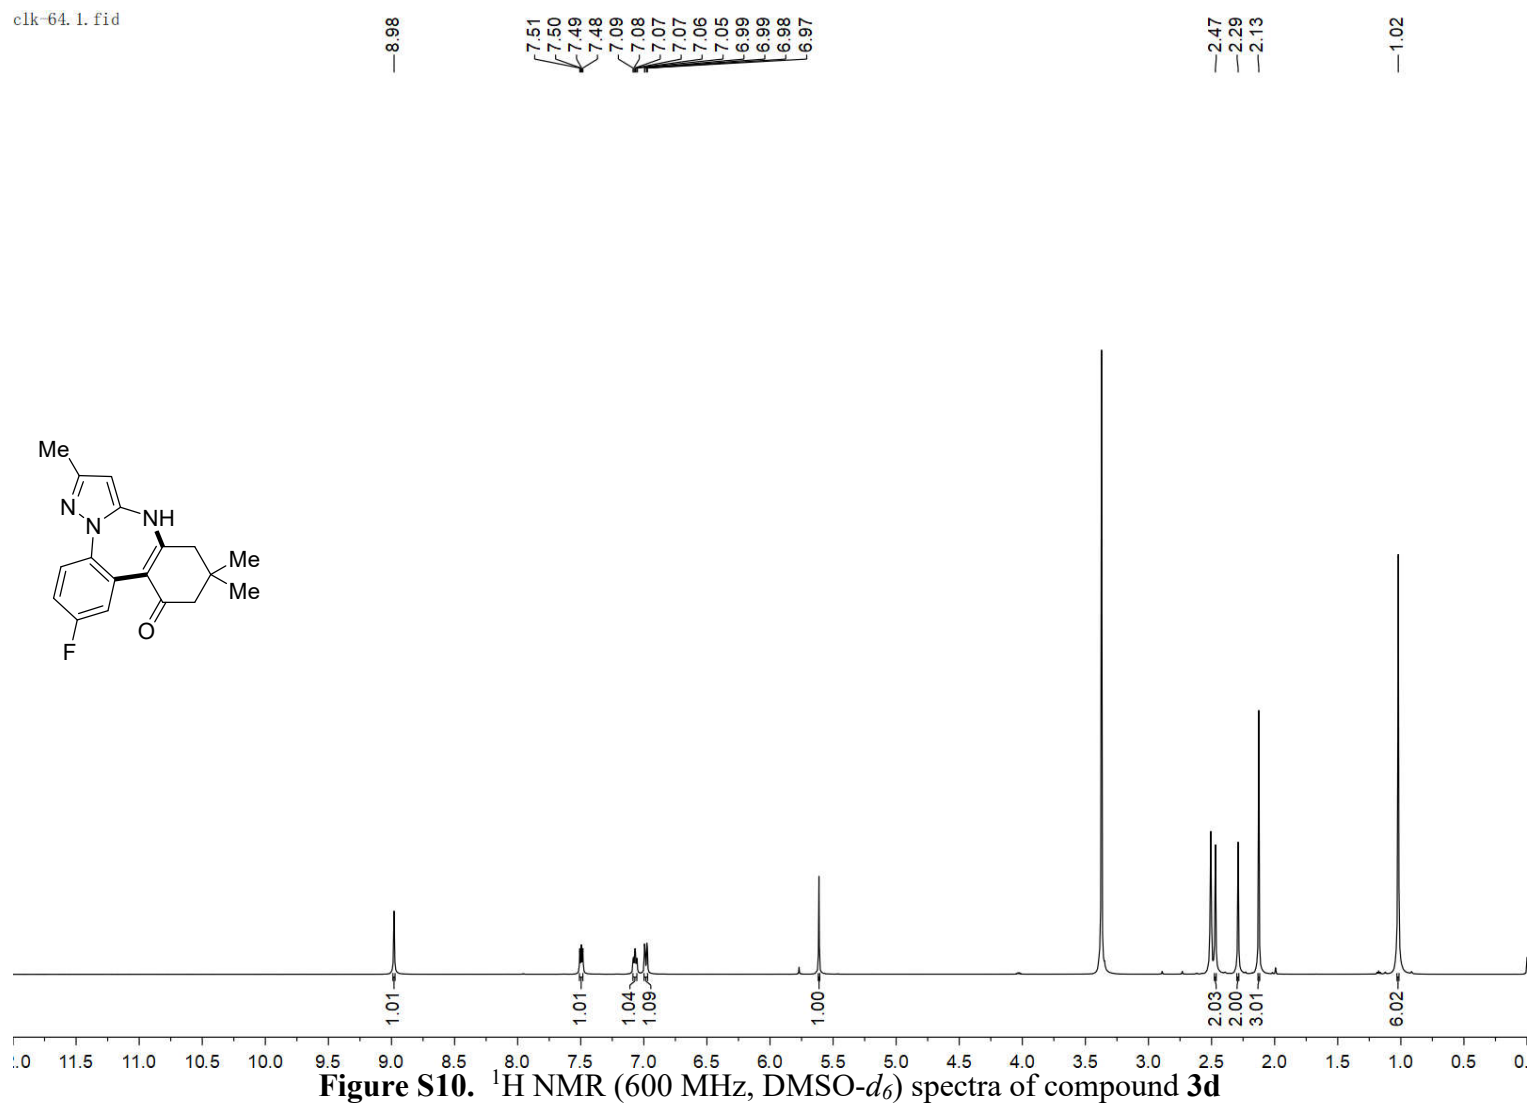

clk-64.2.fid

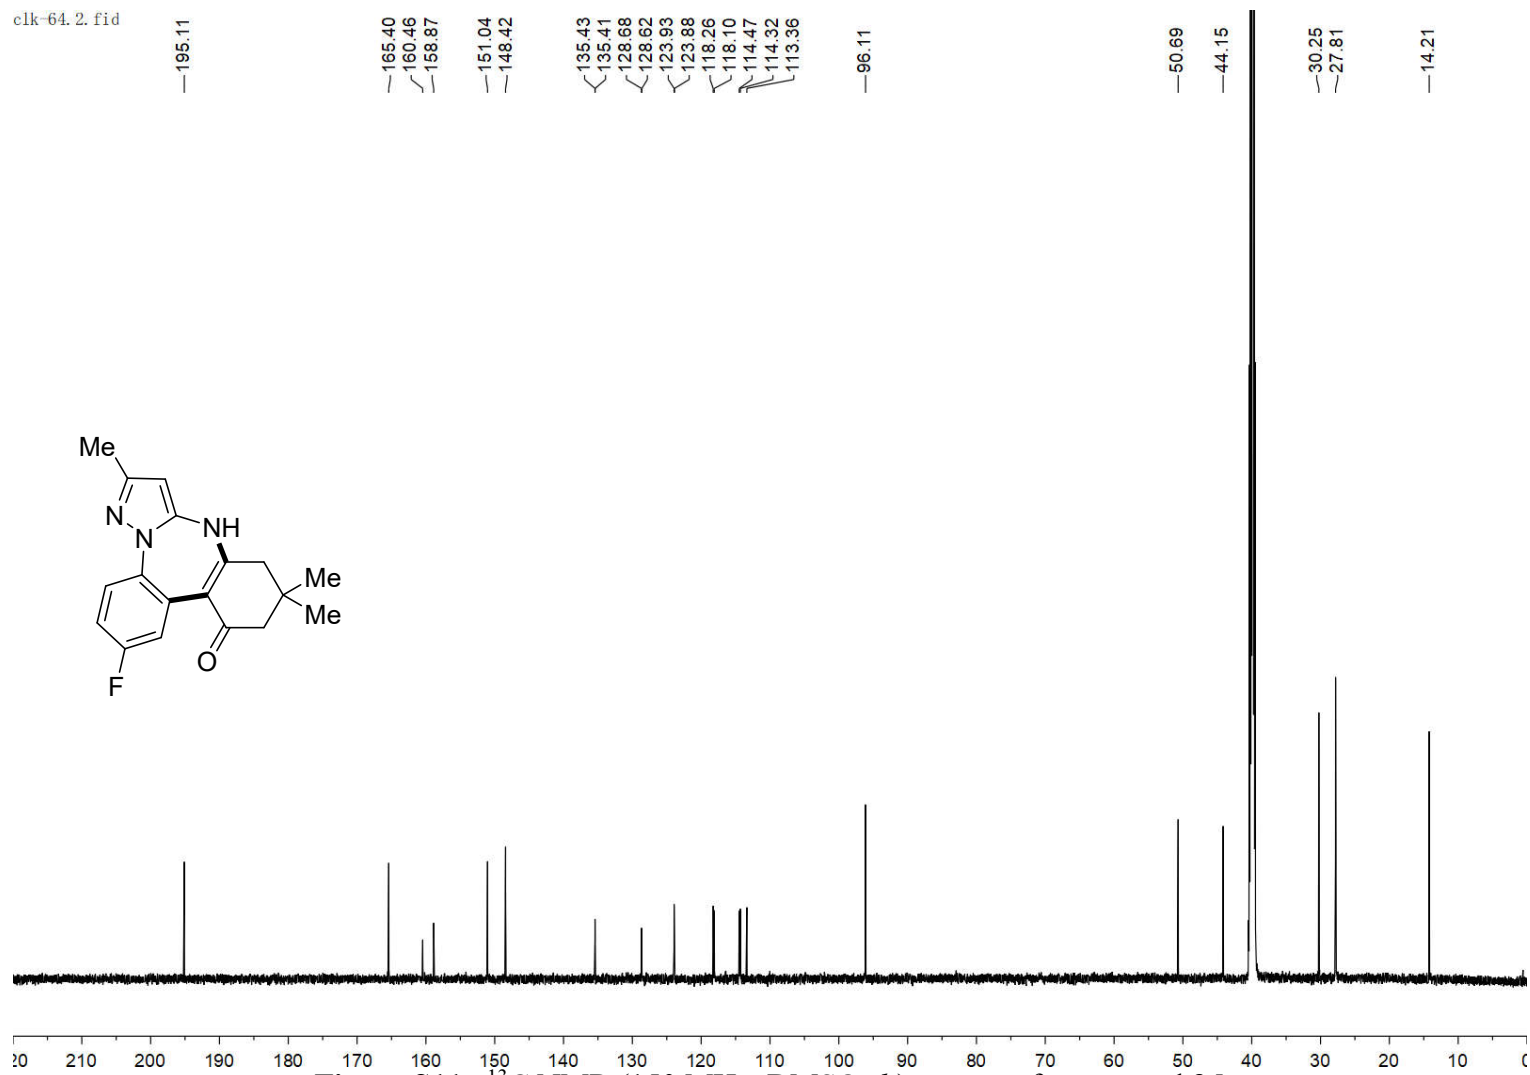

Figure S11.  $^{13}\text{C}$  NMR (150 MHz,  $\text{DMSO-}d_6$ ) spectra of compound 3d

clk-70.1.fid

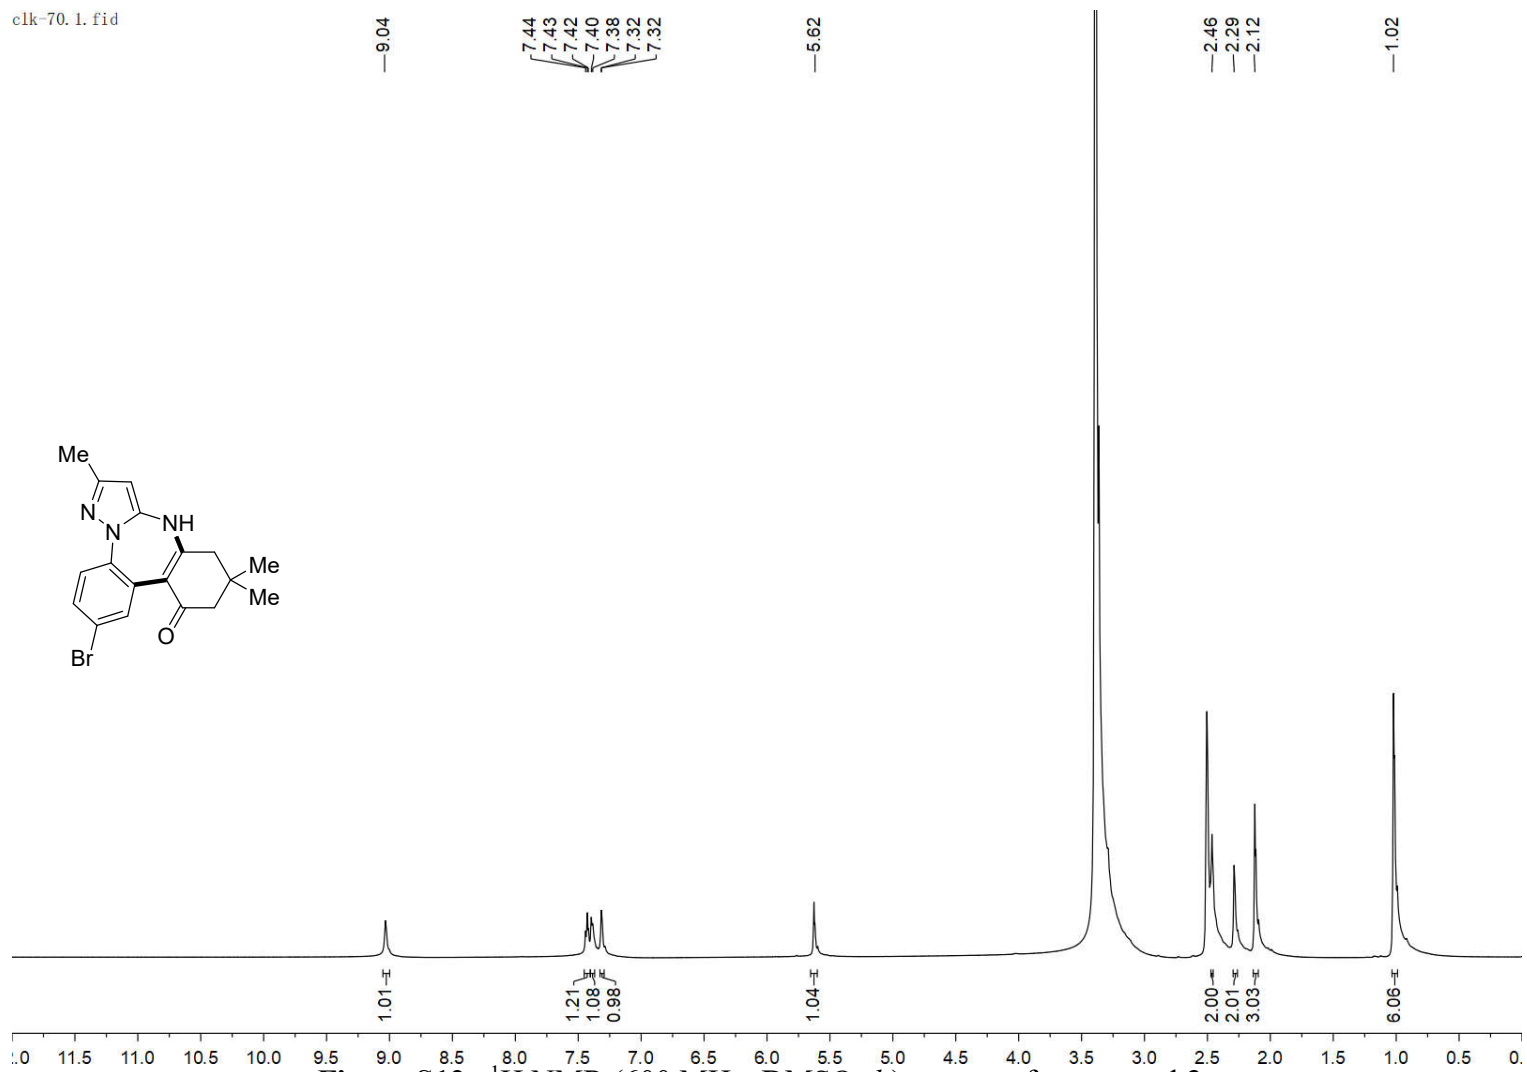

**Figure S12.**  $^1\text{H}$  NMR (600 MHz,  $\text{DMSO}-d_6$ ) spectra of compound **3e**

clk-70.2.fid

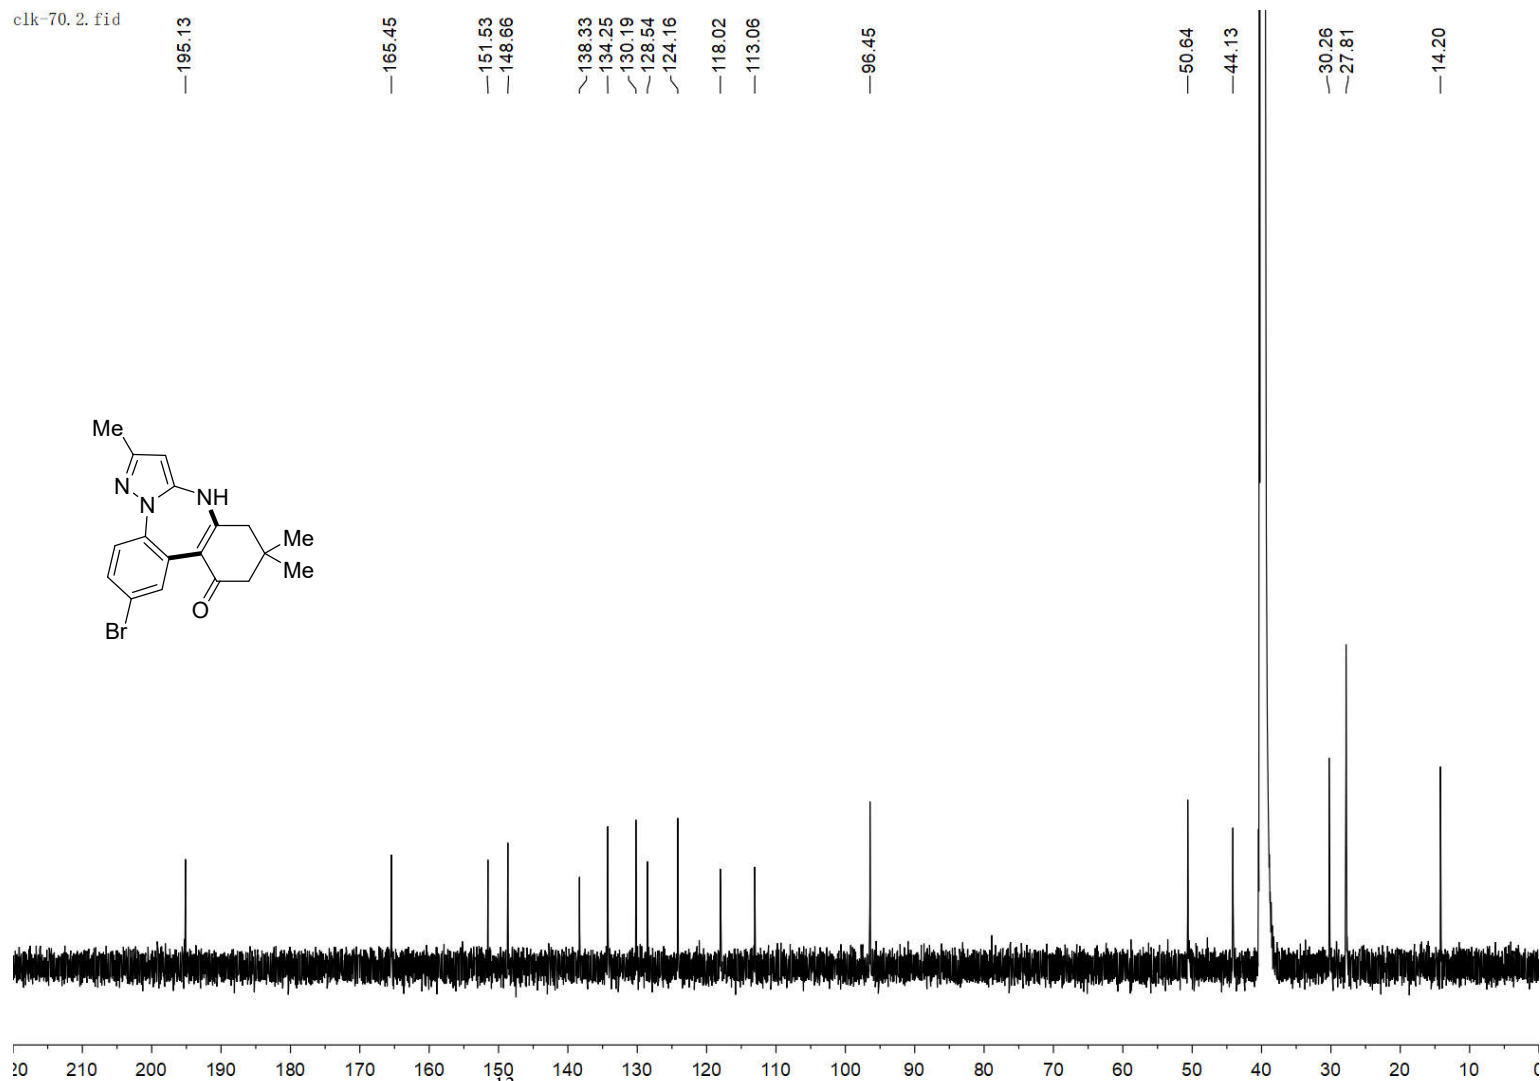

Figure S13.  $^{13}\text{C}$  NMR (150 MHz,  $\text{DMSO-}d_6$ ) spectra of compound 3e

CLK-75. 1. fid

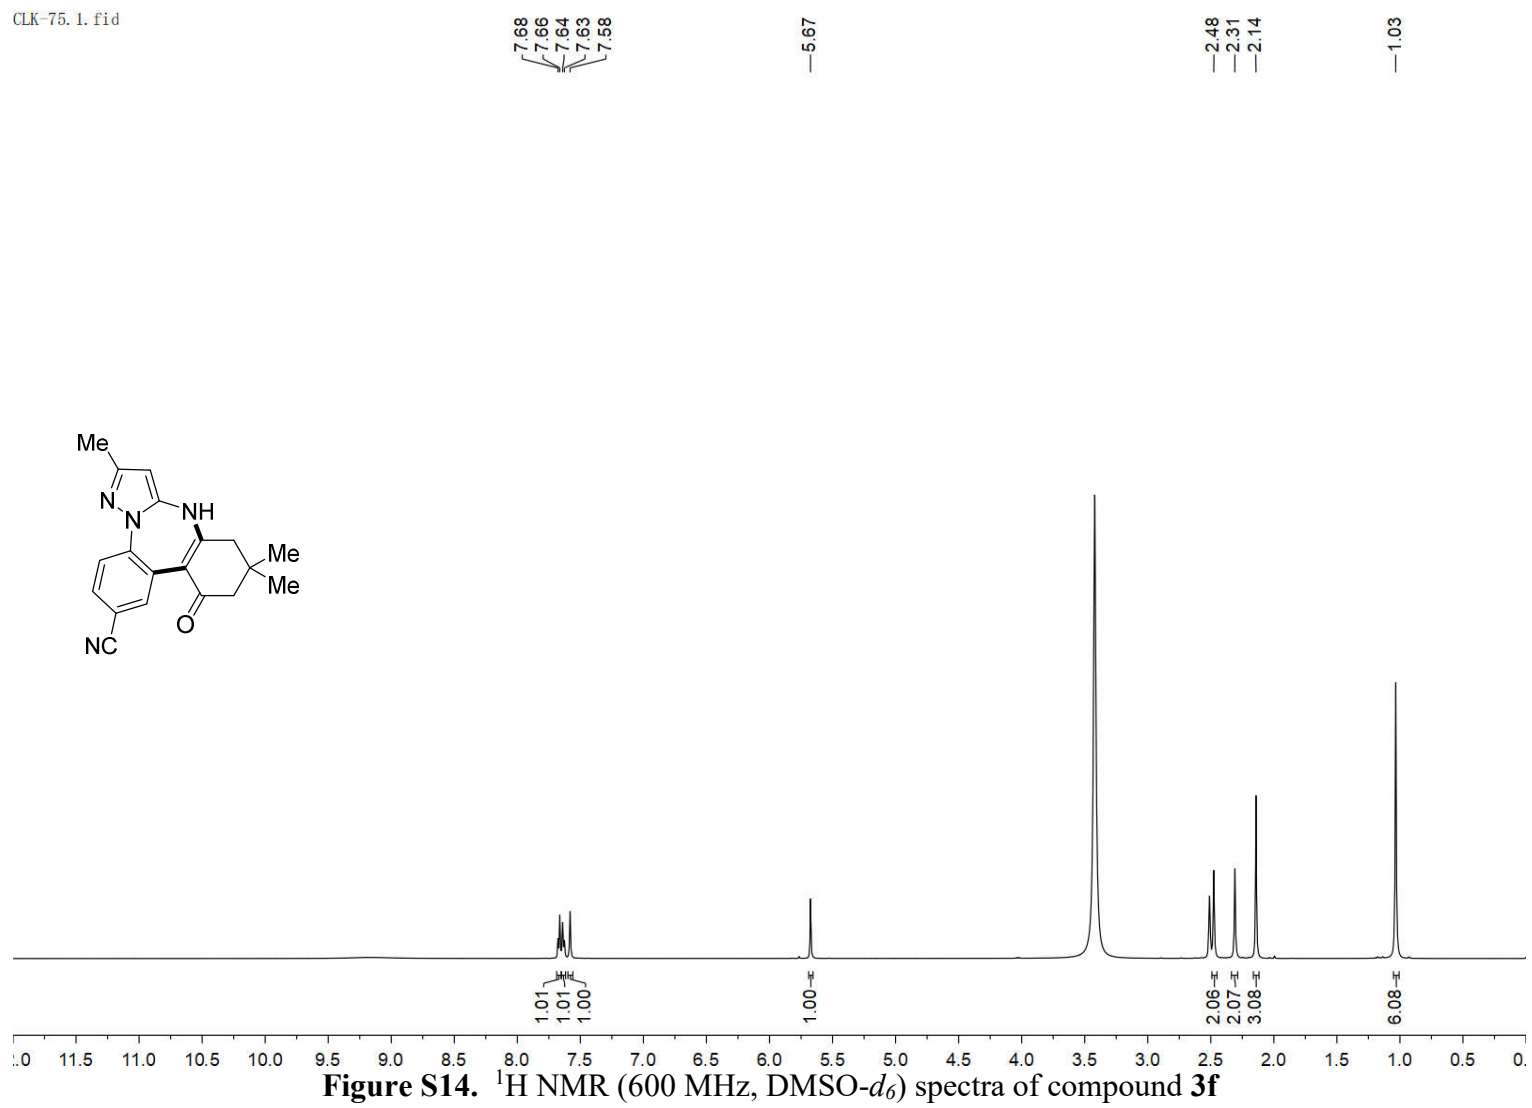

**Figure S14.**  $^1\text{H}$  NMR (600 MHz,  $\text{DMSO-}d_6$ ) spectra of compound **3f**

CLK-75.2.fid

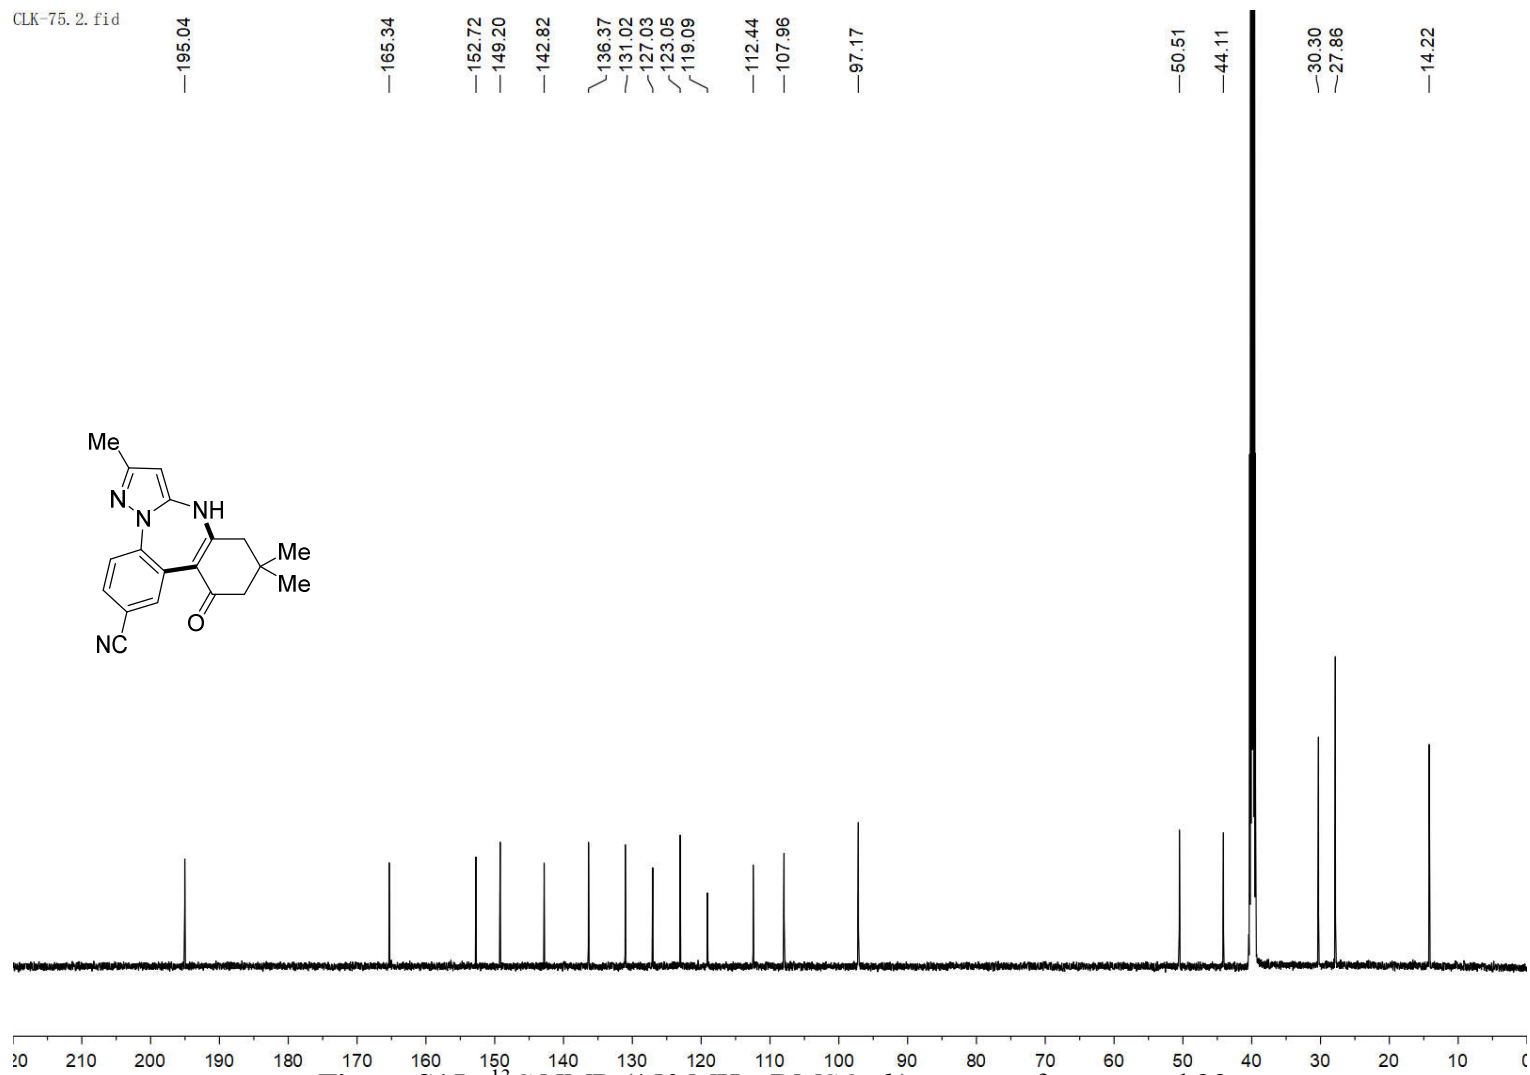

Figure S15.  $^{13}\text{C}$  NMR (150 MHz,  $\text{DMSO-}d_6$ ) spectra of compound 3f



clk-71.1.fid

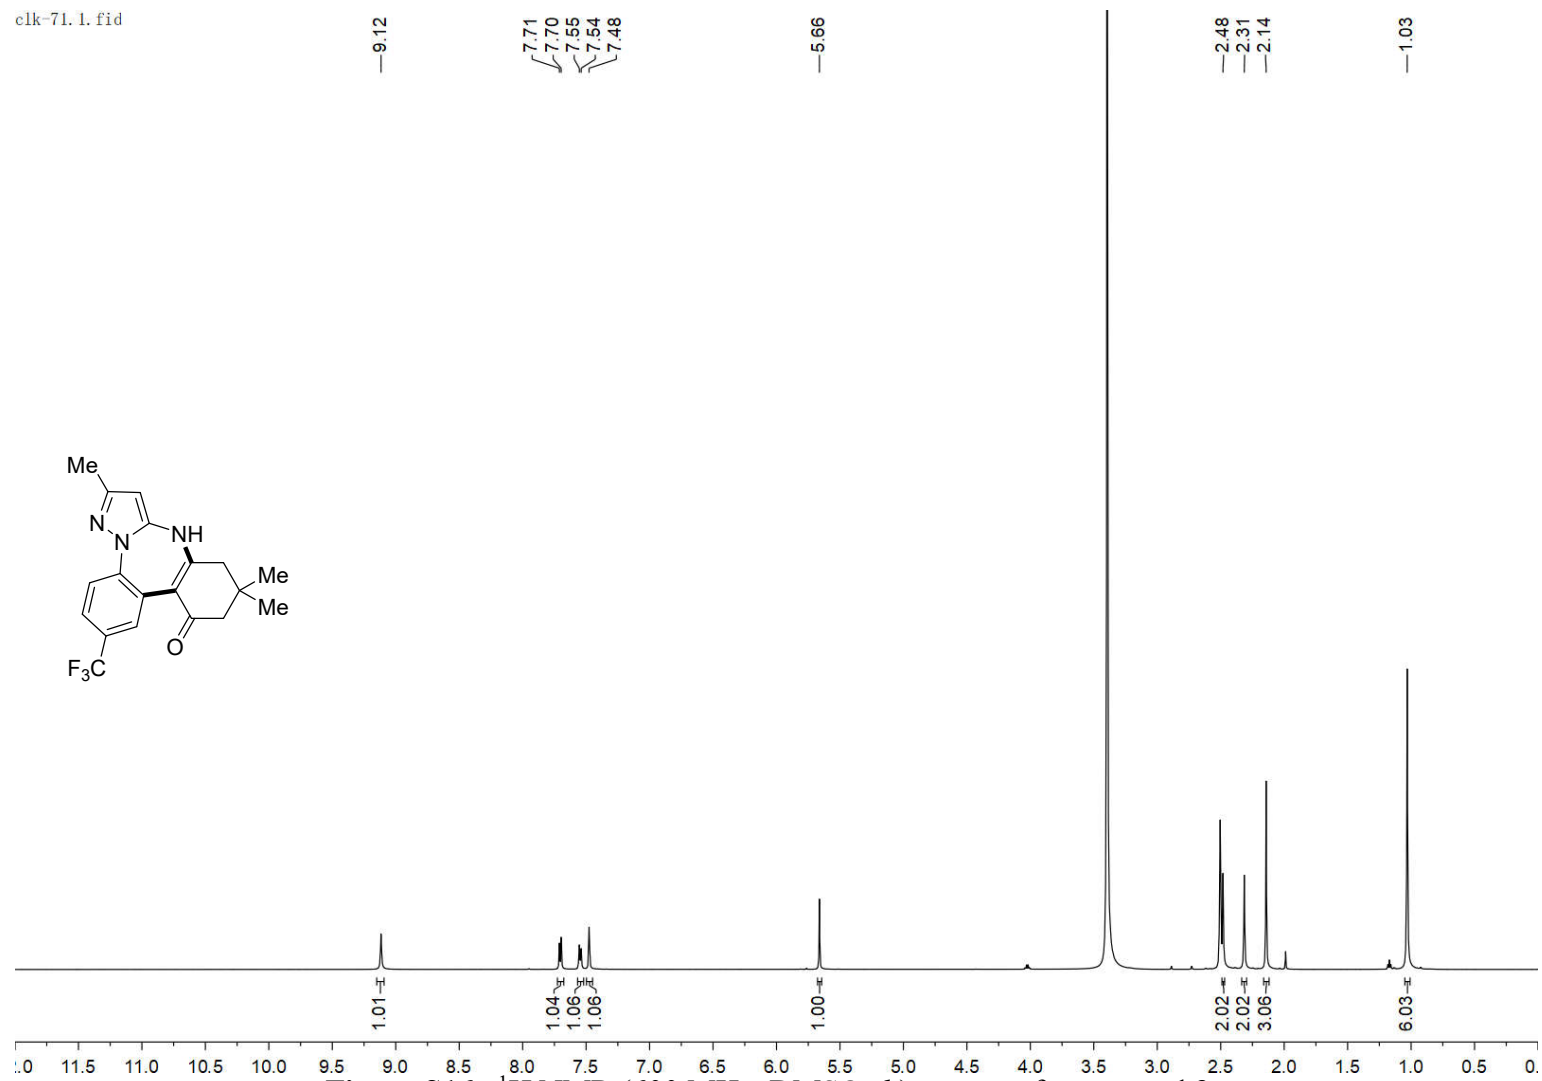

**Figure S16.** <sup>1</sup>H NMR (600 MHz, DMSO-*d*<sub>6</sub>) spectra of compound **3g**

clk-71.2.fid

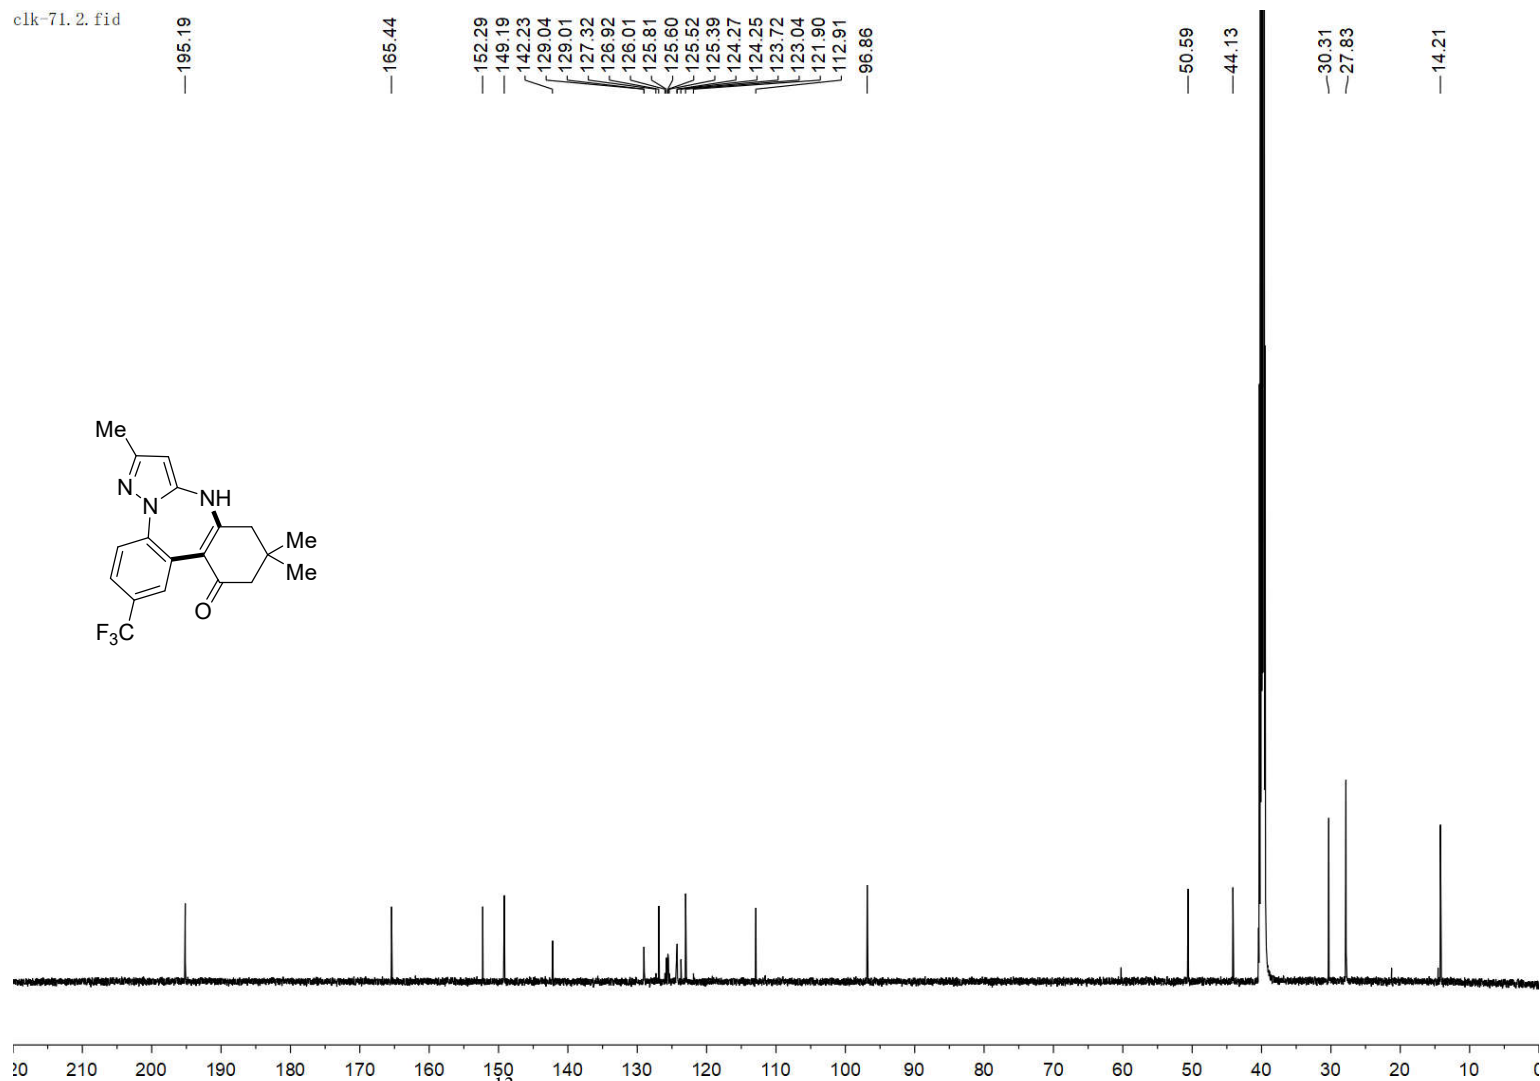

Figure S17.  $^{13}\text{C}$  NMR (150 MHz,  $\text{DMSO}-d_6$ ) spectra of compound **3g**

CLK-74.1.fid

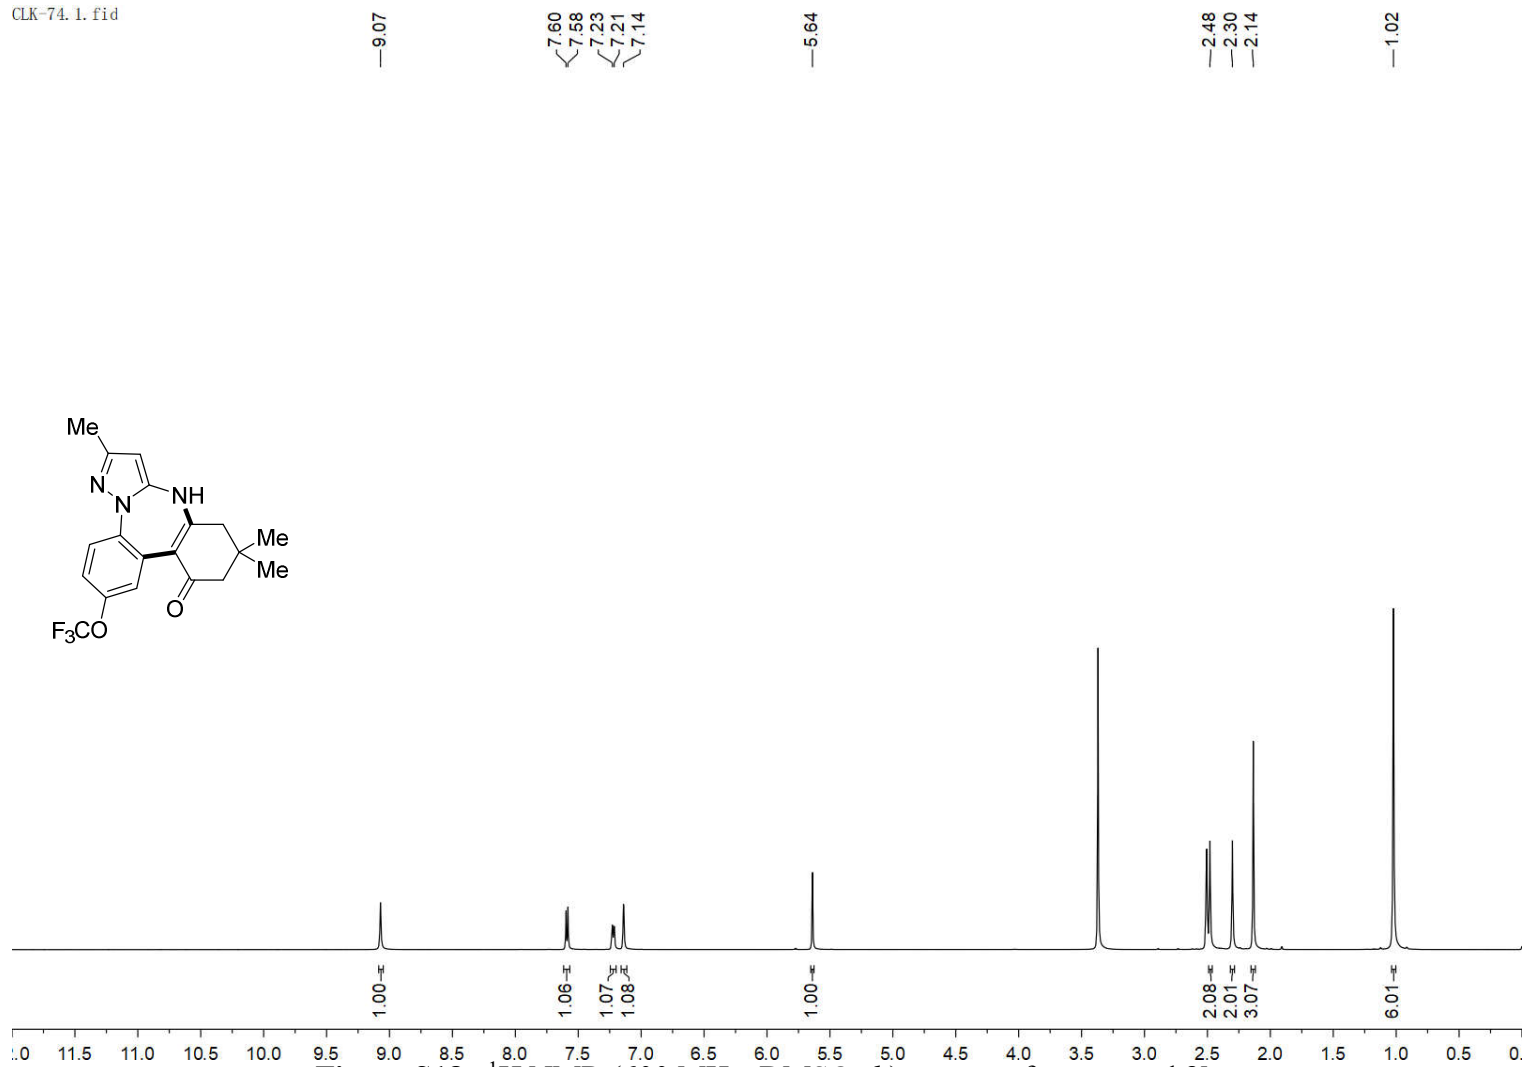

**Figure S18.**  $^1\text{H}$  NMR (600 MHz,  $\text{DMSO-}d_6$ ) spectra of compound **3h**

CLK-74.2.fid

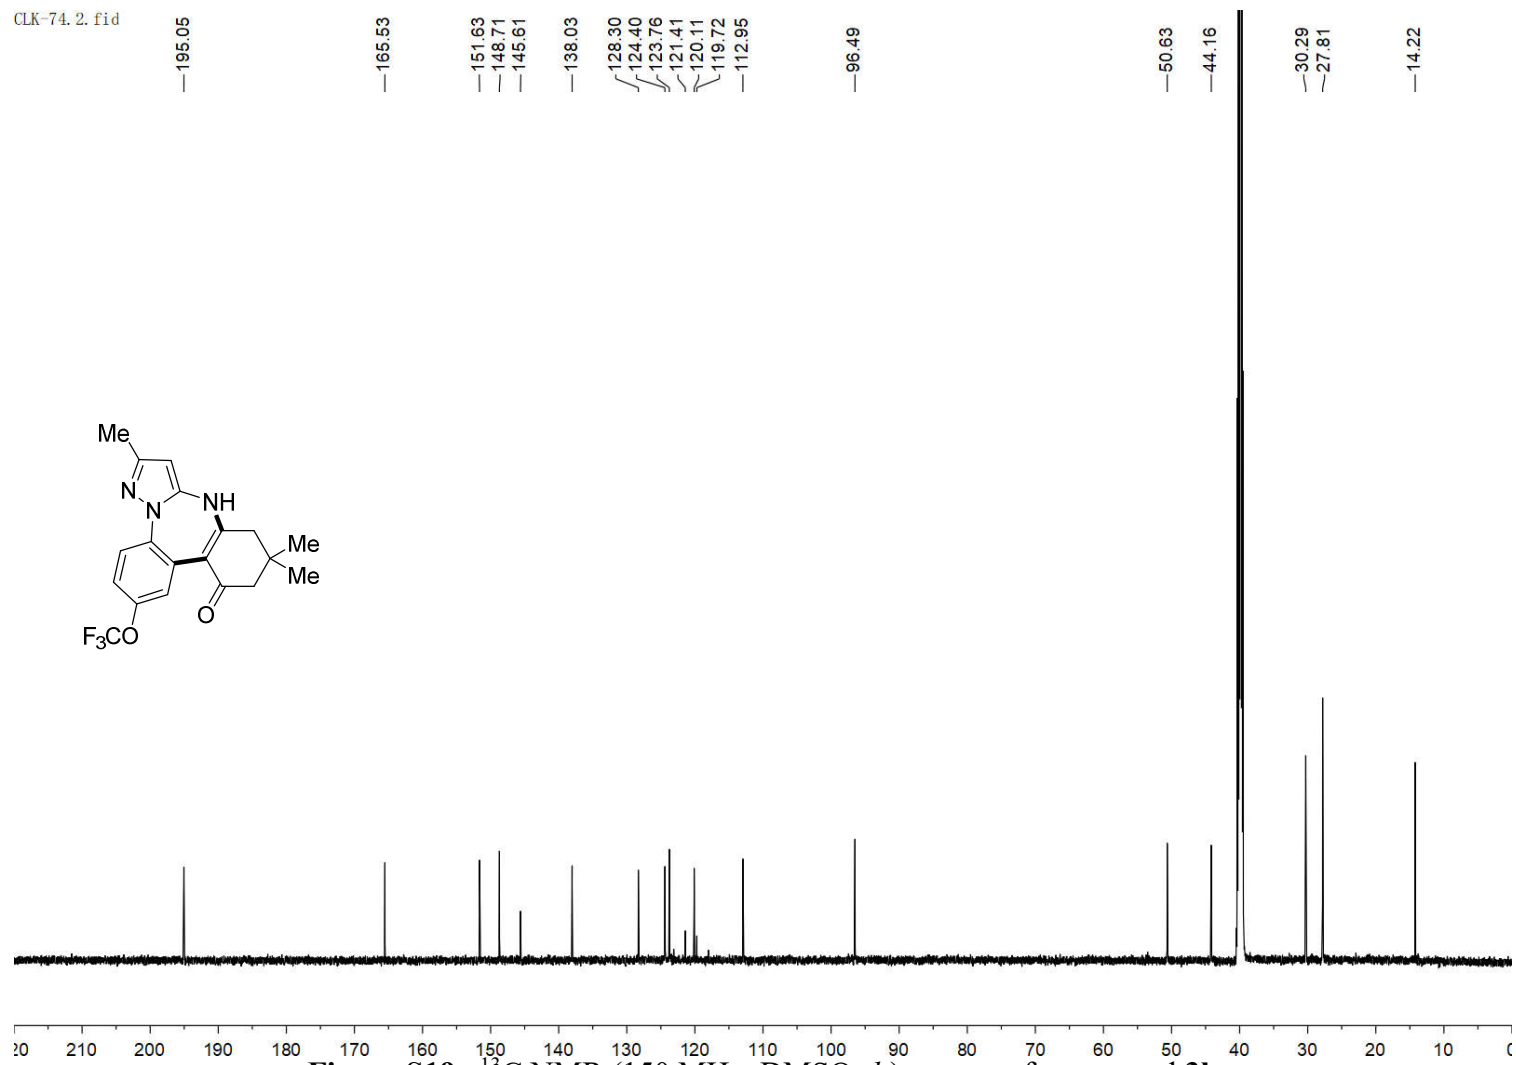

Figure S19. <sup>13</sup>C NMR (150 MHz, DMSO-*d*<sub>6</sub>) spectra of compound 3h

CLK-77.1.fid

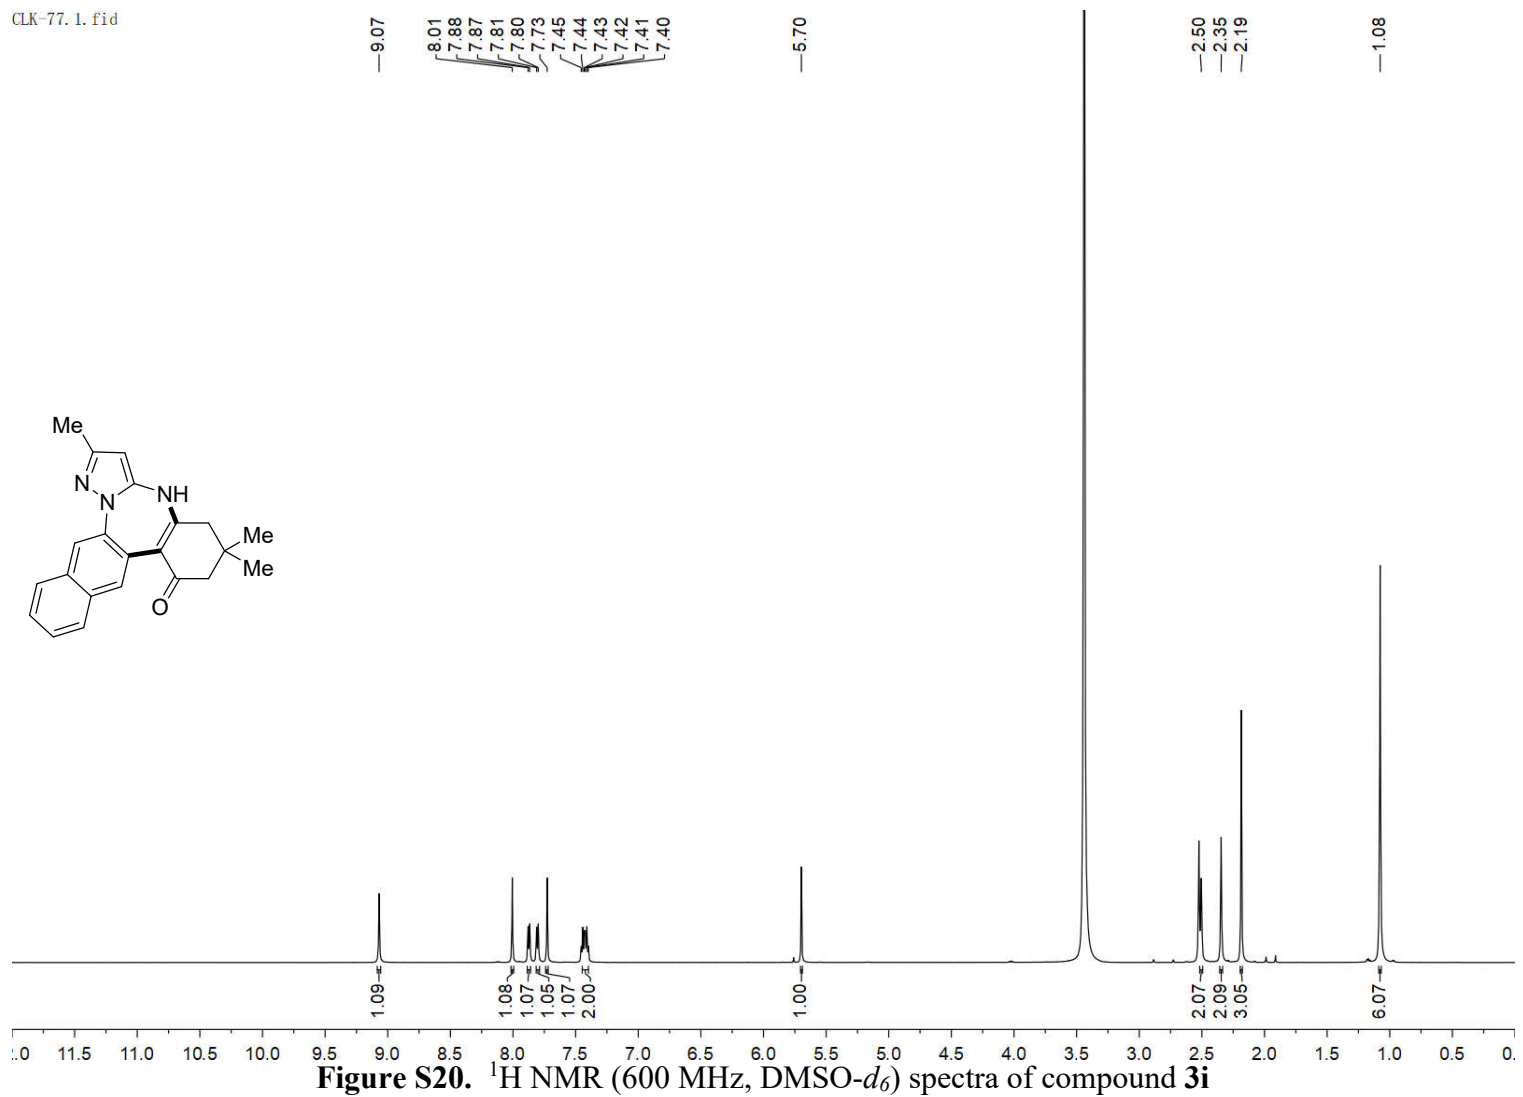

CLK-77.2.fid

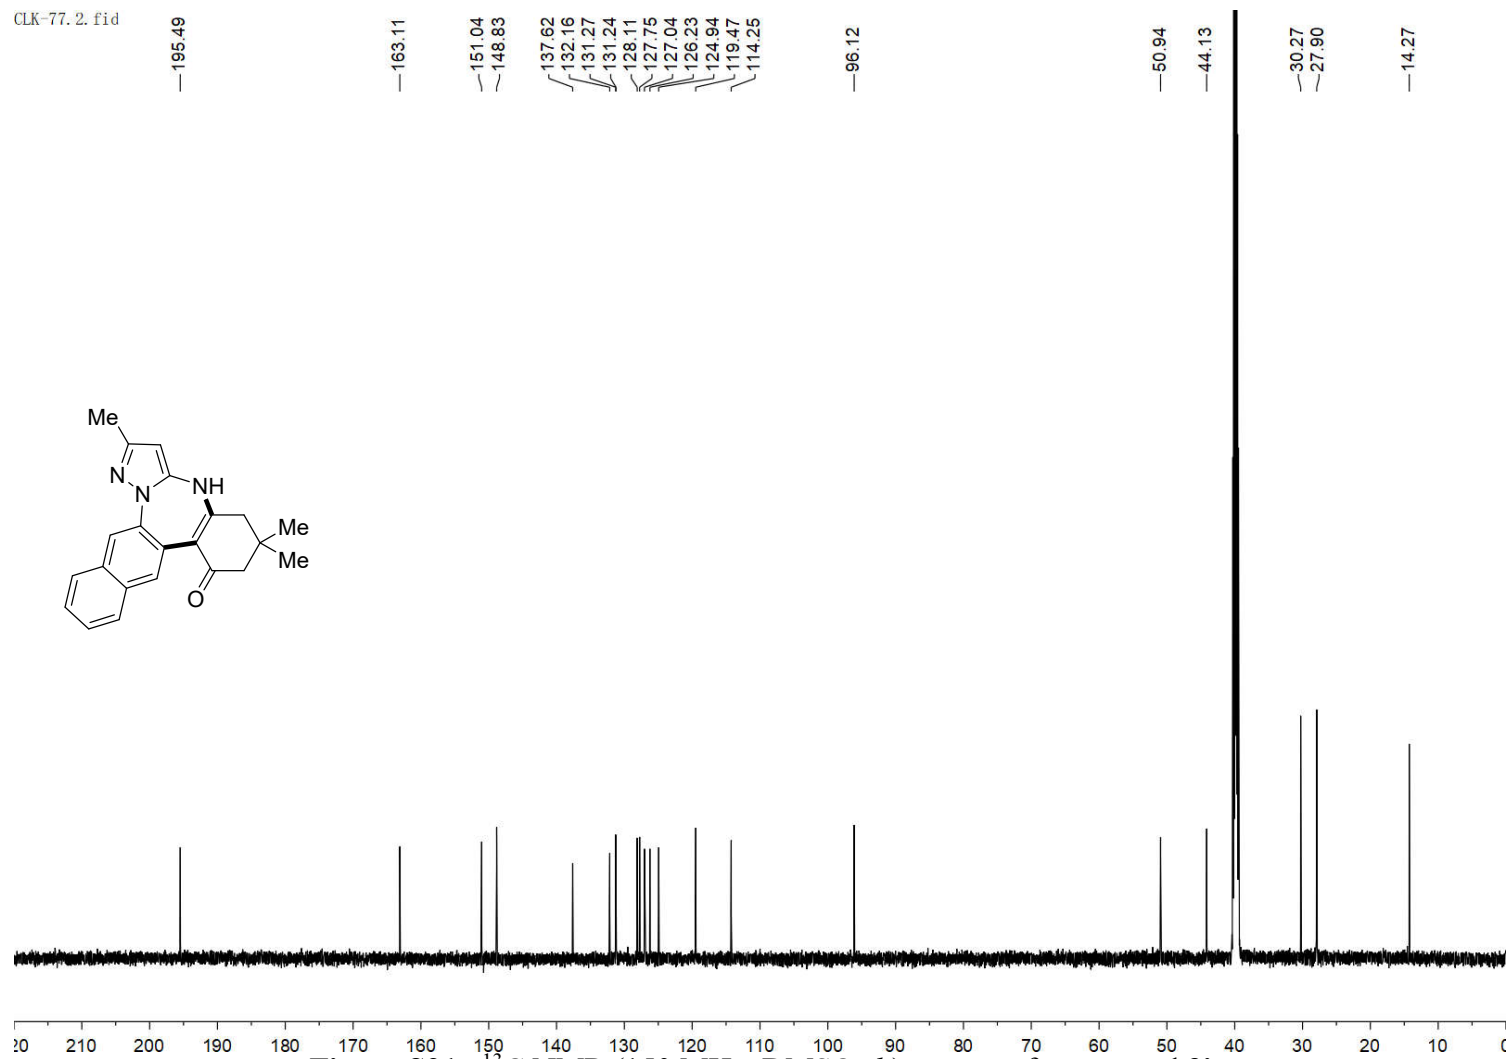

Figure S21.  $^{13}\text{C}$  NMR (150 MHz,  $\text{DMSO}-d_6$ ) spectra of compound **3i**

clk-81.1.fid

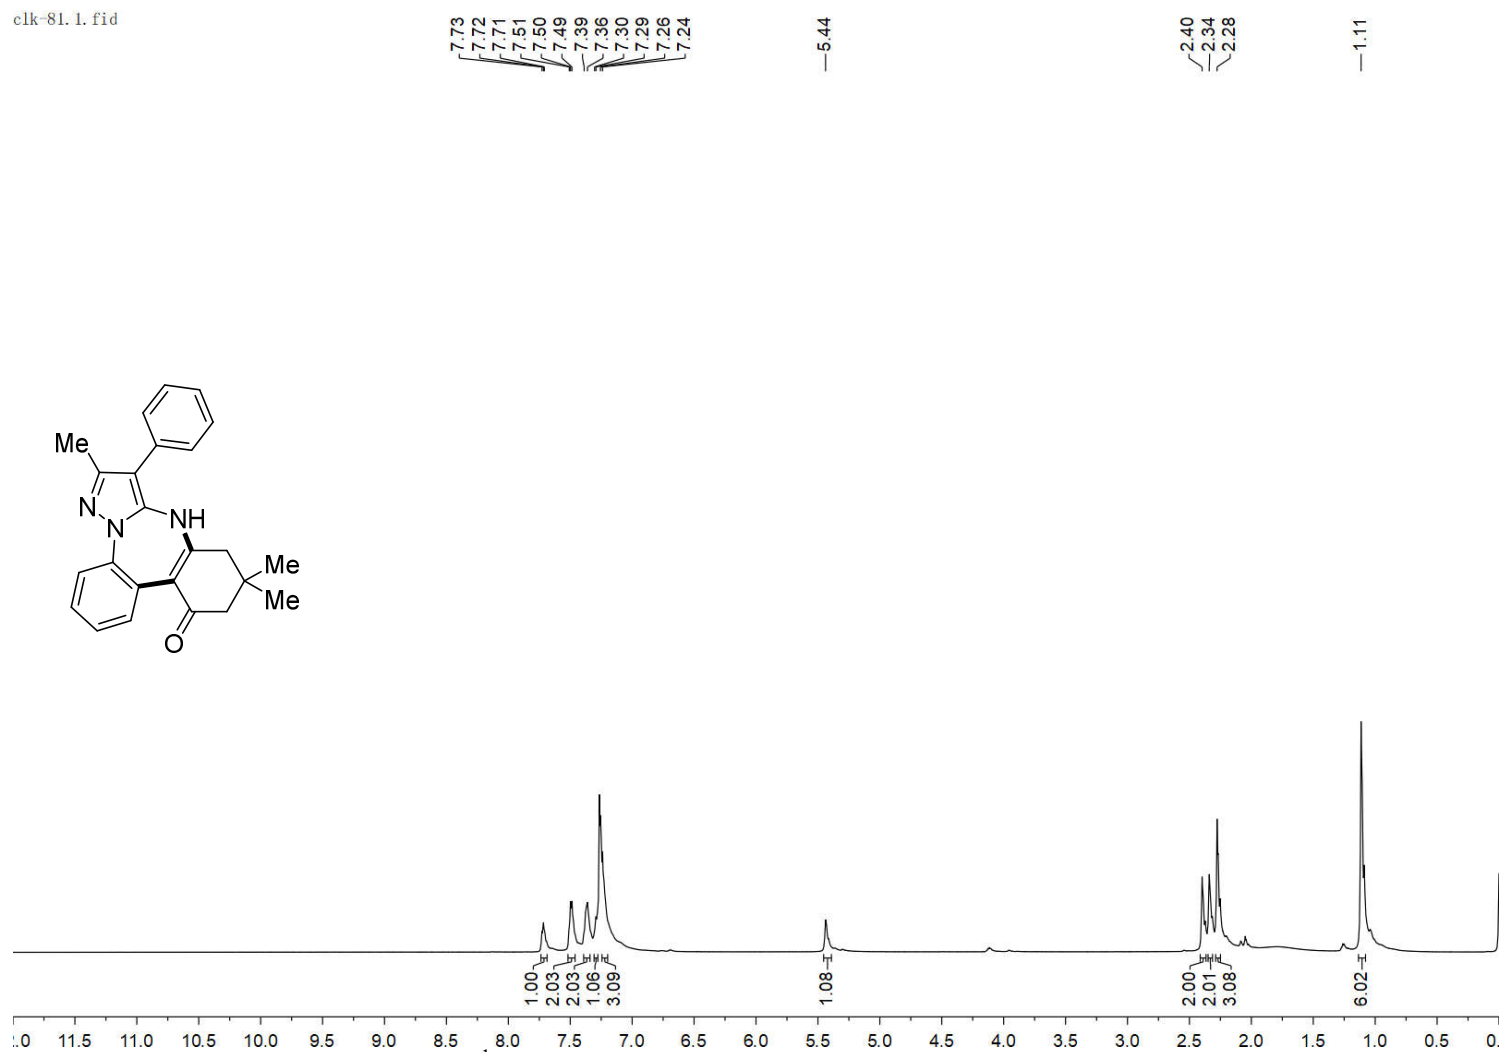

**Figure S22.** <sup>1</sup>H NMR (600 MHz, DMSO-*d*<sub>6</sub>) spectra of compound **3j**

clk-81.2.fid

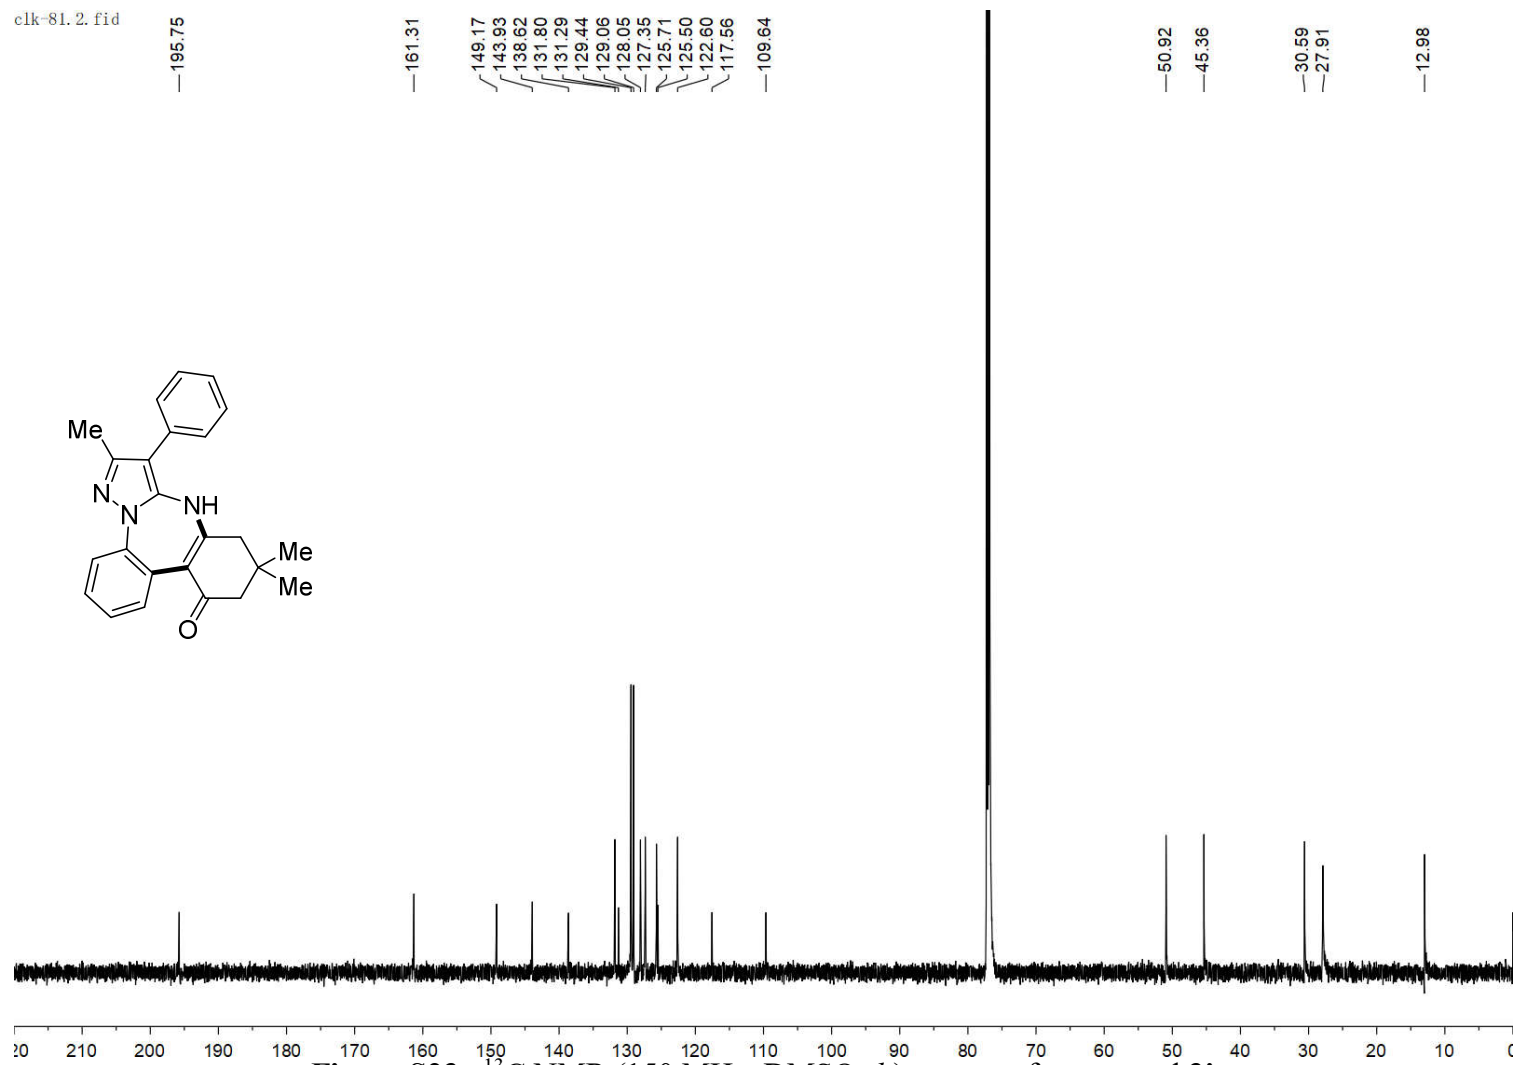

Figure S23.  $^{13}\text{C}$  NMR (150 MHz,  $\text{DMSO}-d_6$ ) spectra of compound 3j



CLK-100.1.fid

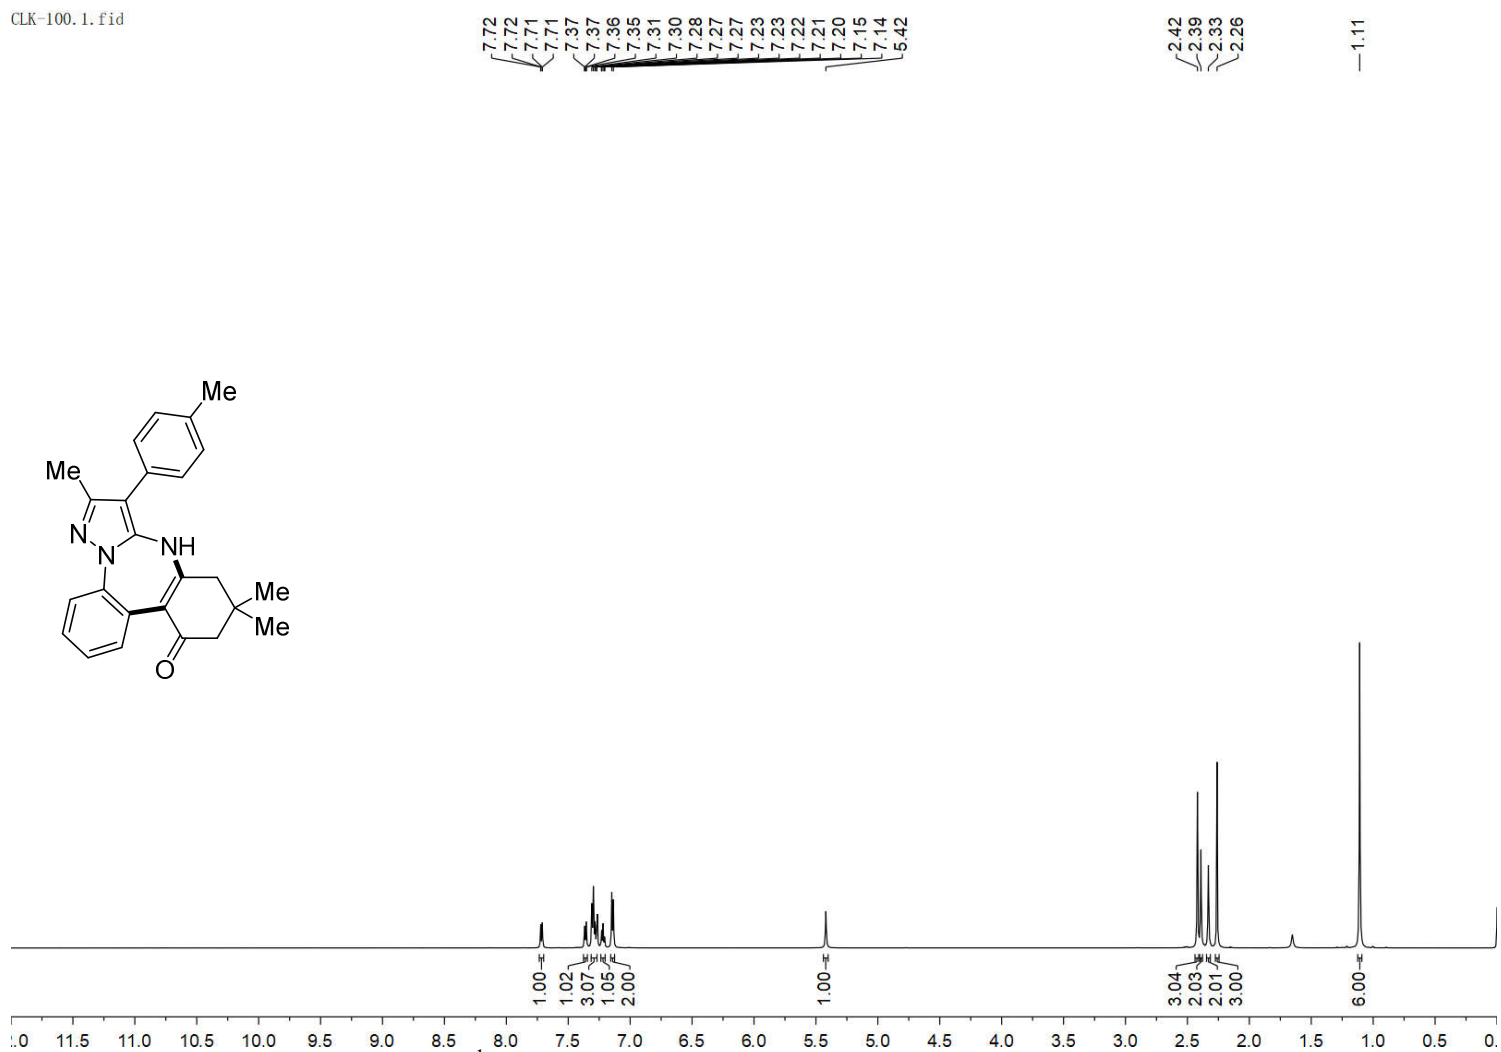

Figure S24. <sup>1</sup>H NMR (600 MHz, DMSO-*d*<sub>6</sub>) spectra of compound 3k

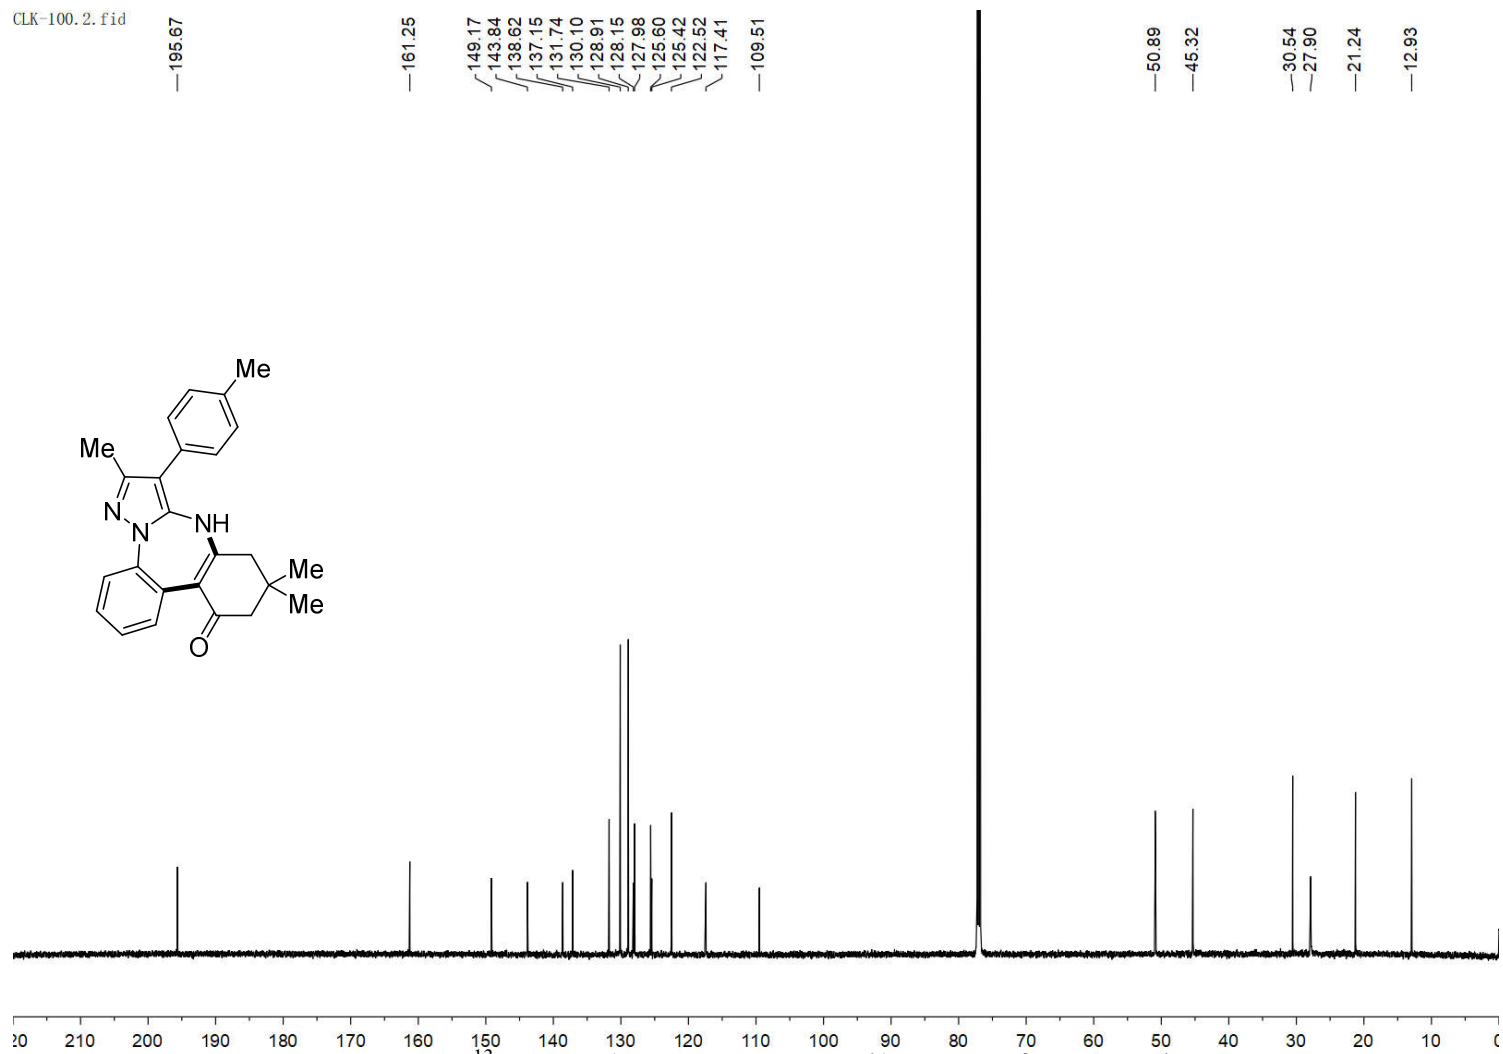

Figure S25.  $^{13}\text{C}$  NMR (150 MHz,  $\text{DMSO-}d_6$ ) spectra of compound **3k**

CLK-102.1.fid

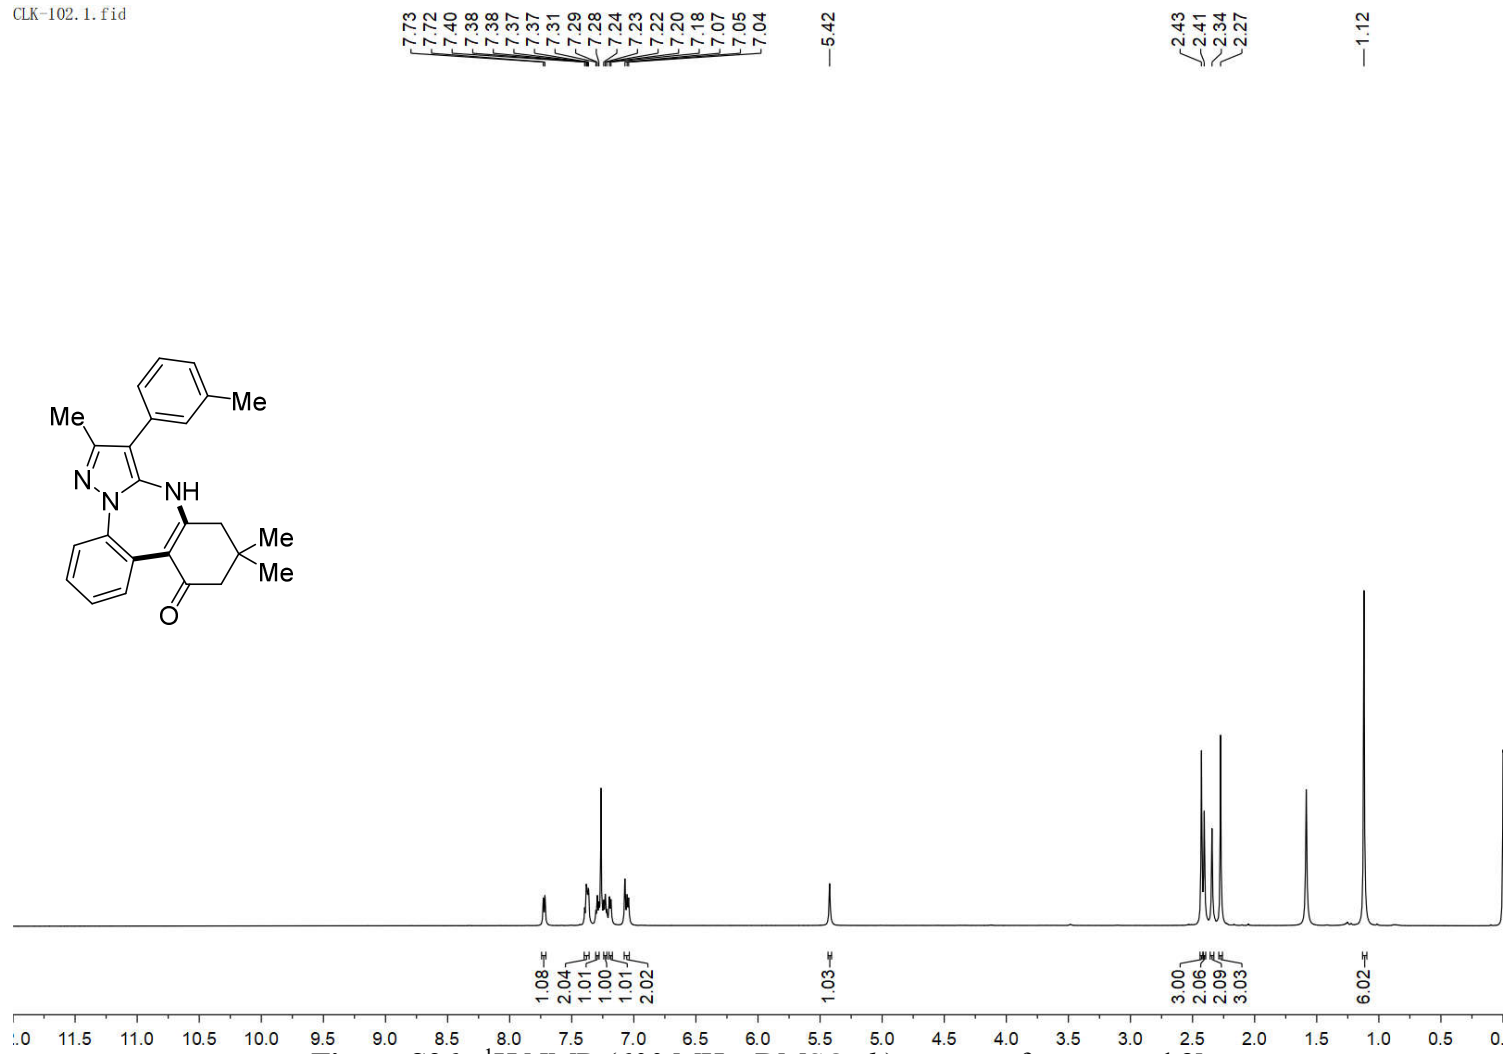

Figure S26. <sup>1</sup>H NMR (600 MHz, DMSO-*d*<sub>6</sub>) spectra of compound 3I

CLK-102.2.fid

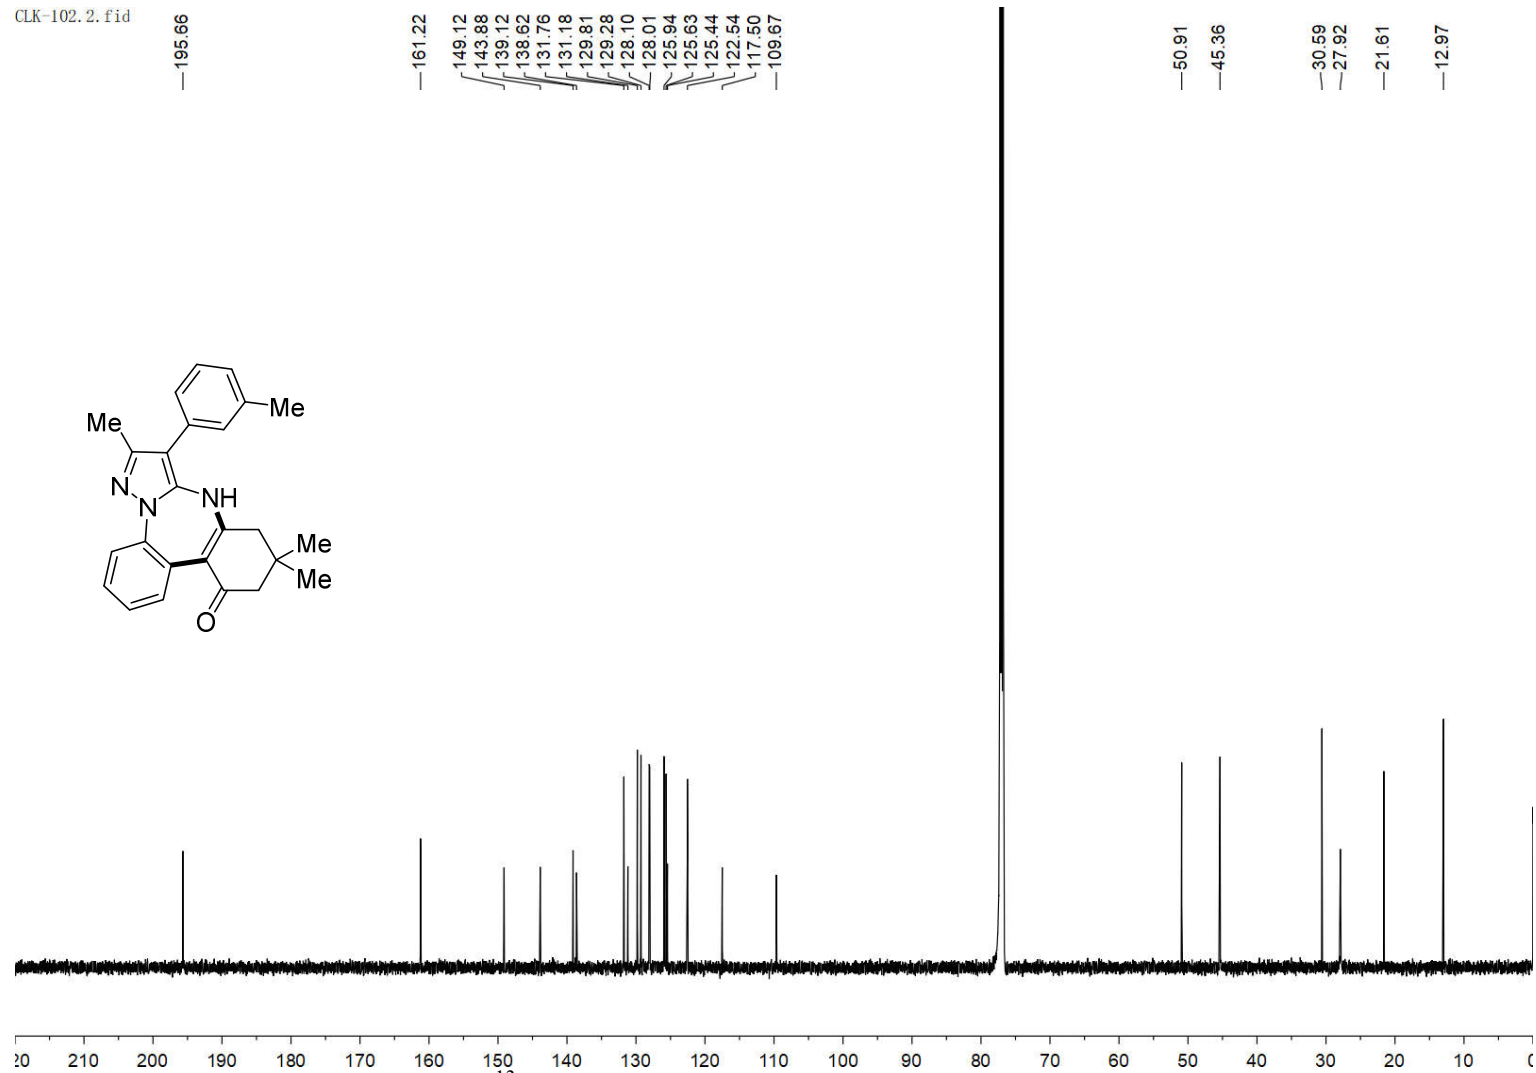

Figure S27. <sup>13</sup>C NMR (150 MHz, DMSO-*d*<sub>6</sub>) spectra of compound 31

CLK-103.1.fid

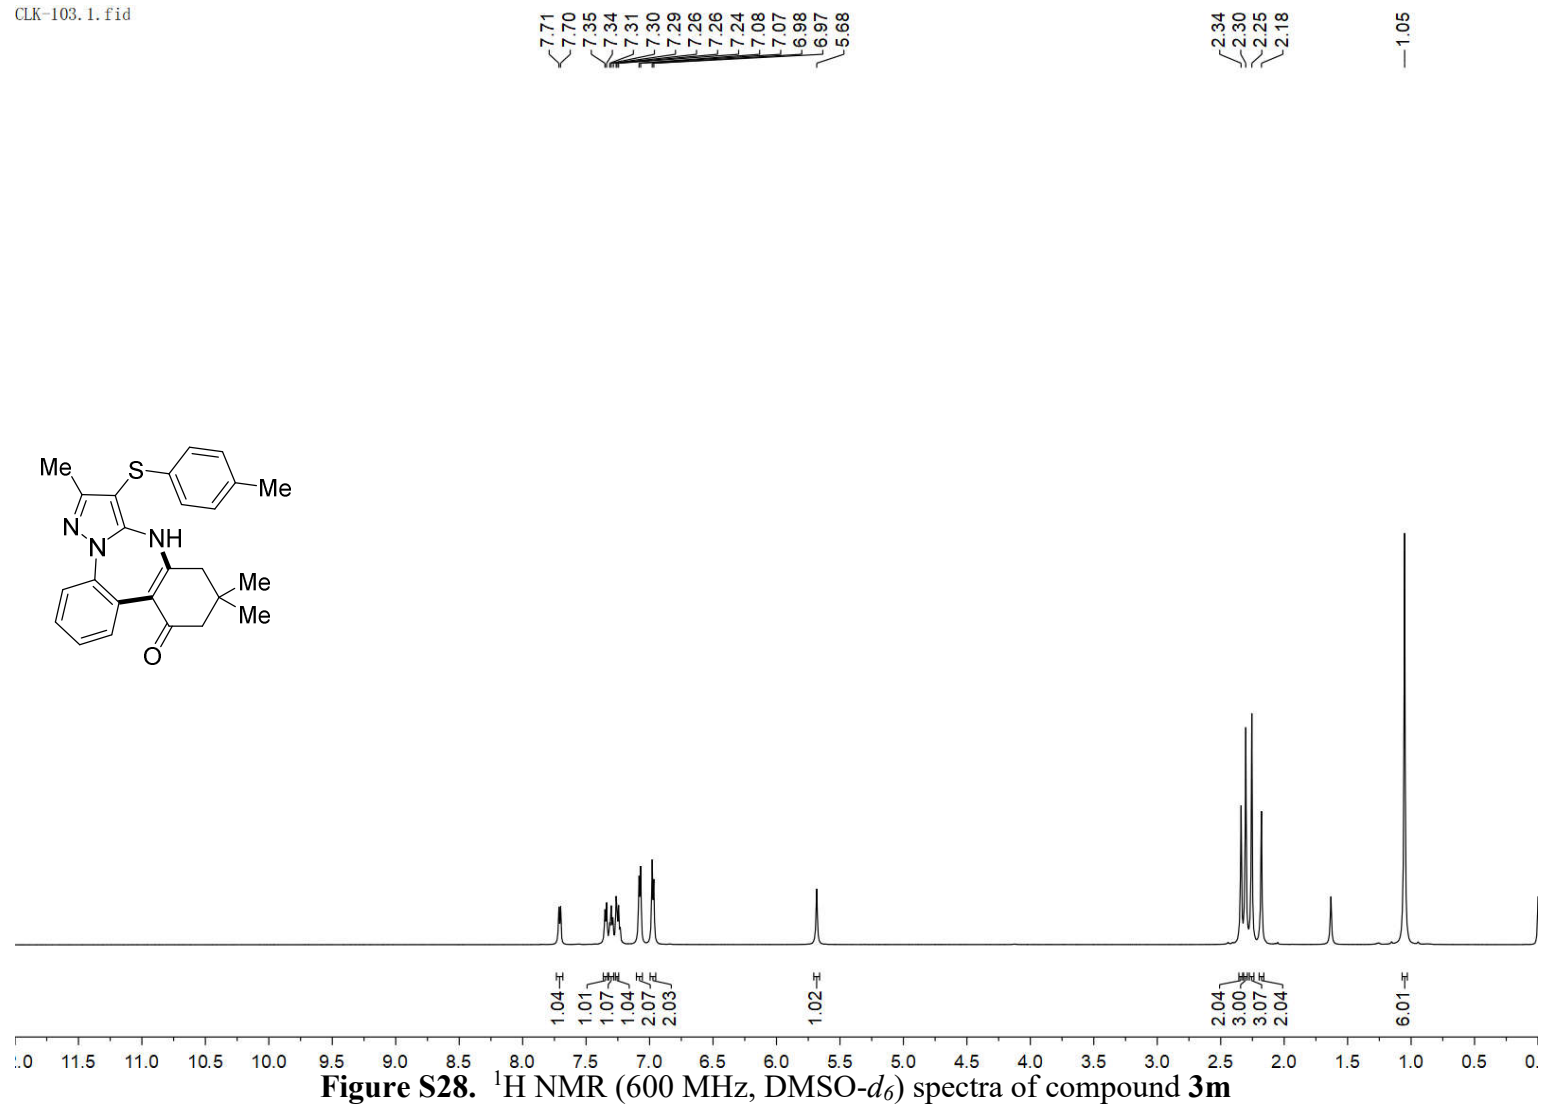

Figure S28. <sup>1</sup>H NMR (600 MHz, DMSO-*d*<sub>6</sub>) spectra of compound **3m**

CLK-103.2.fid

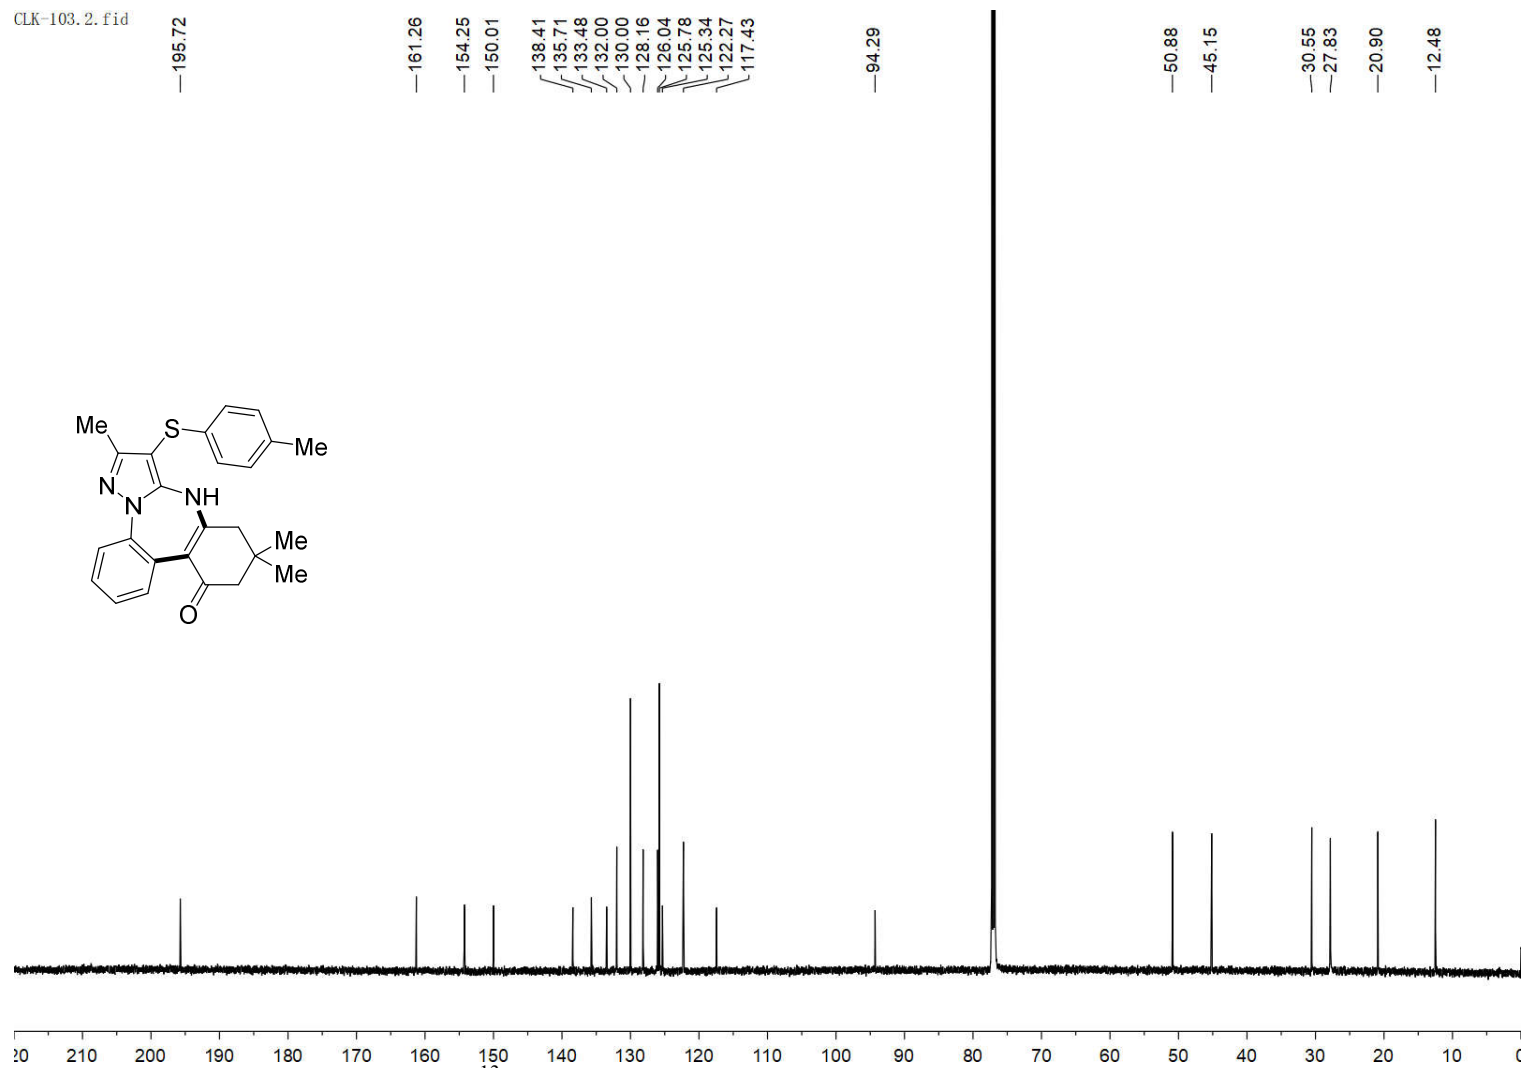

Figure S29.  $^{13}\text{C}$  NMR (150 MHz,  $\text{DMSO-}d_6$ ) spectra of compound **3m**

CLK-104.1.fid

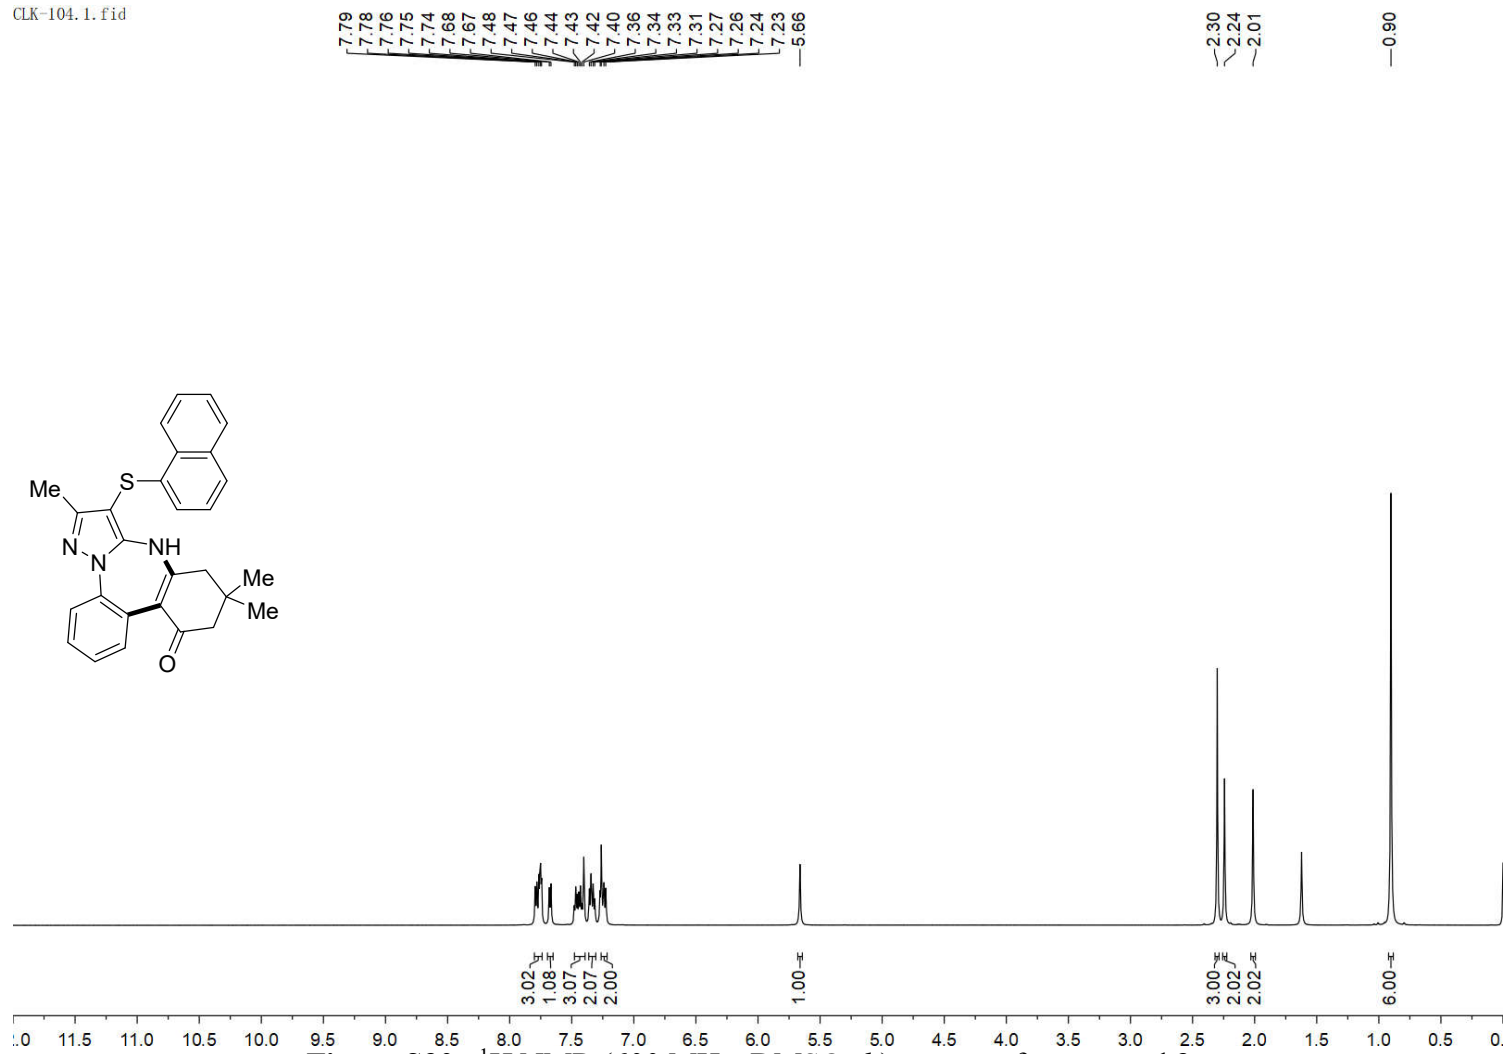

Figure S30. <sup>1</sup>H NMR (600 MHz, DMSO-*d*<sub>6</sub>) spectra of compound **3n**

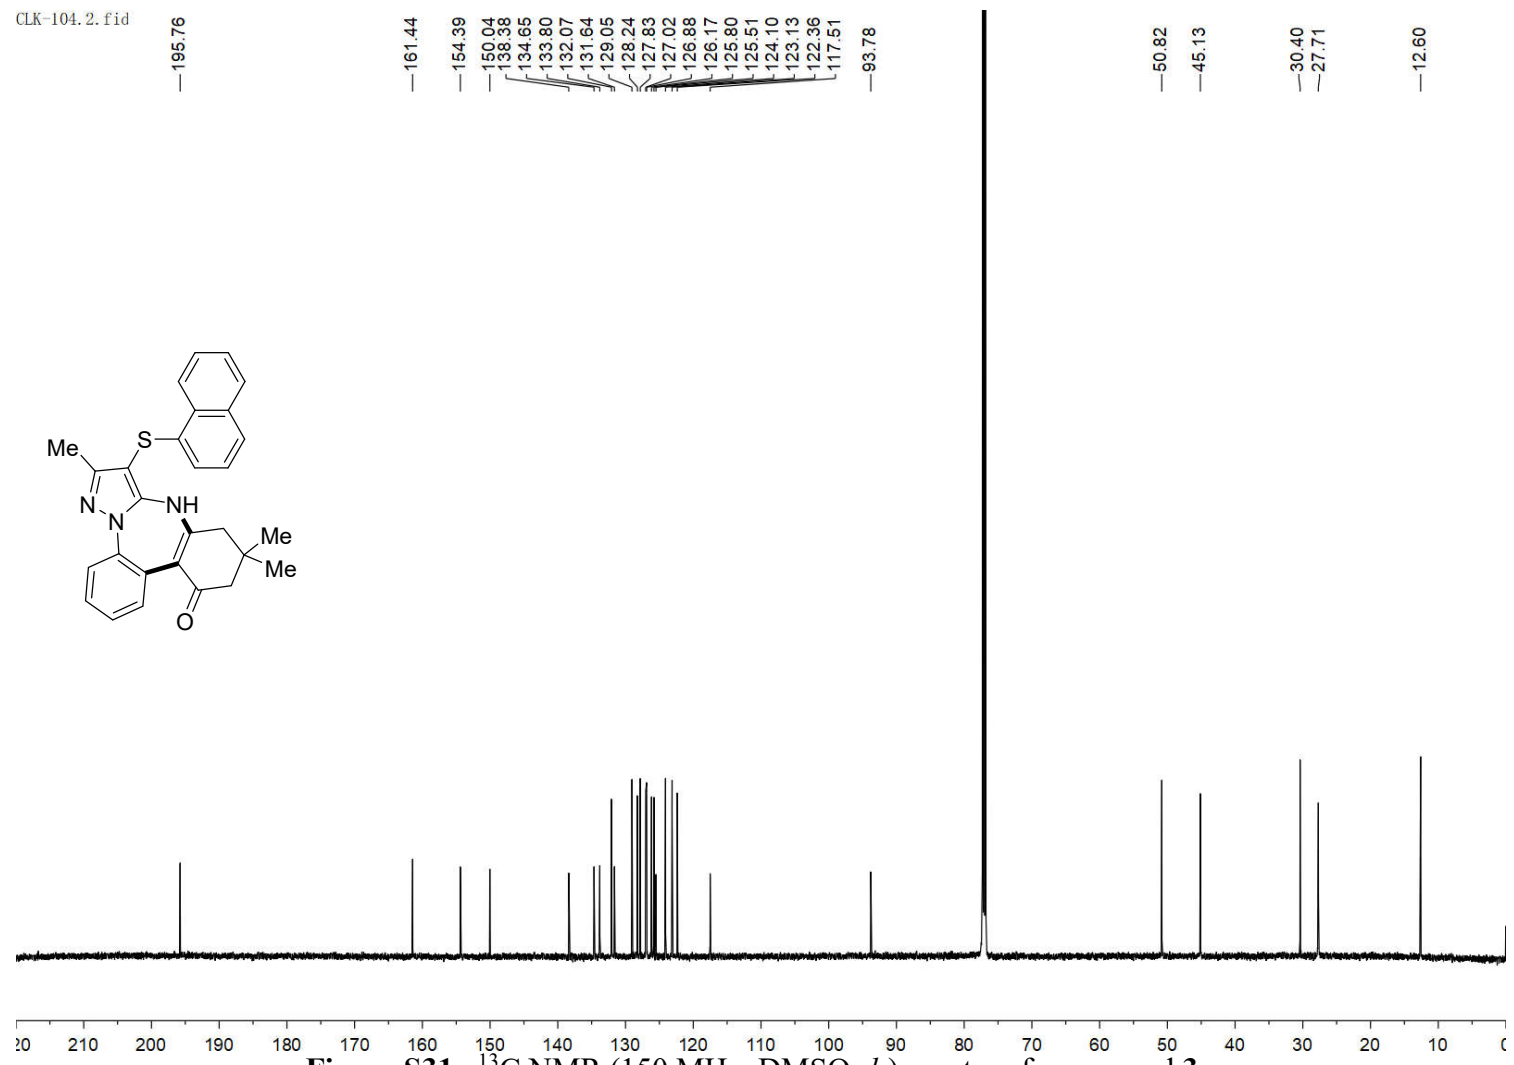

Figure S31. <sup>13</sup>C NMR (150 MHz, DMSO-*d*<sub>6</sub>) spectra of compound **3n**



clk-83. 1. fid

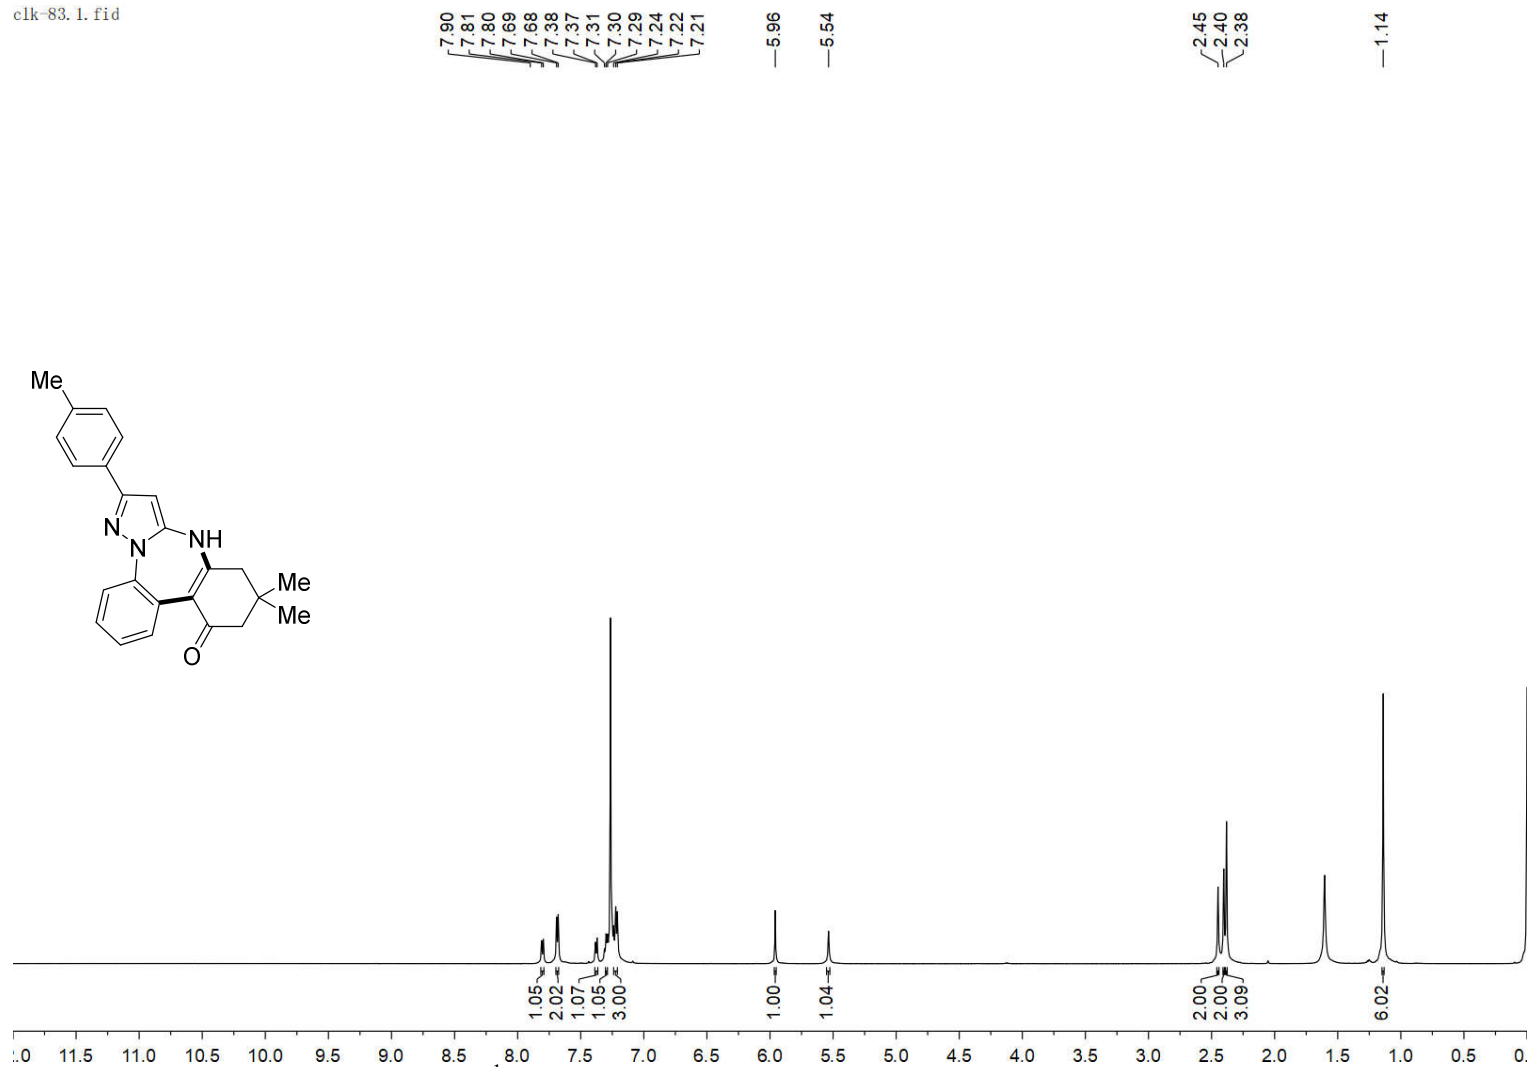

Figure S32.  $^1\text{H}$  NMR (600 MHz,  $\text{DMSO-}d_6$ ) spectra of compound **30**

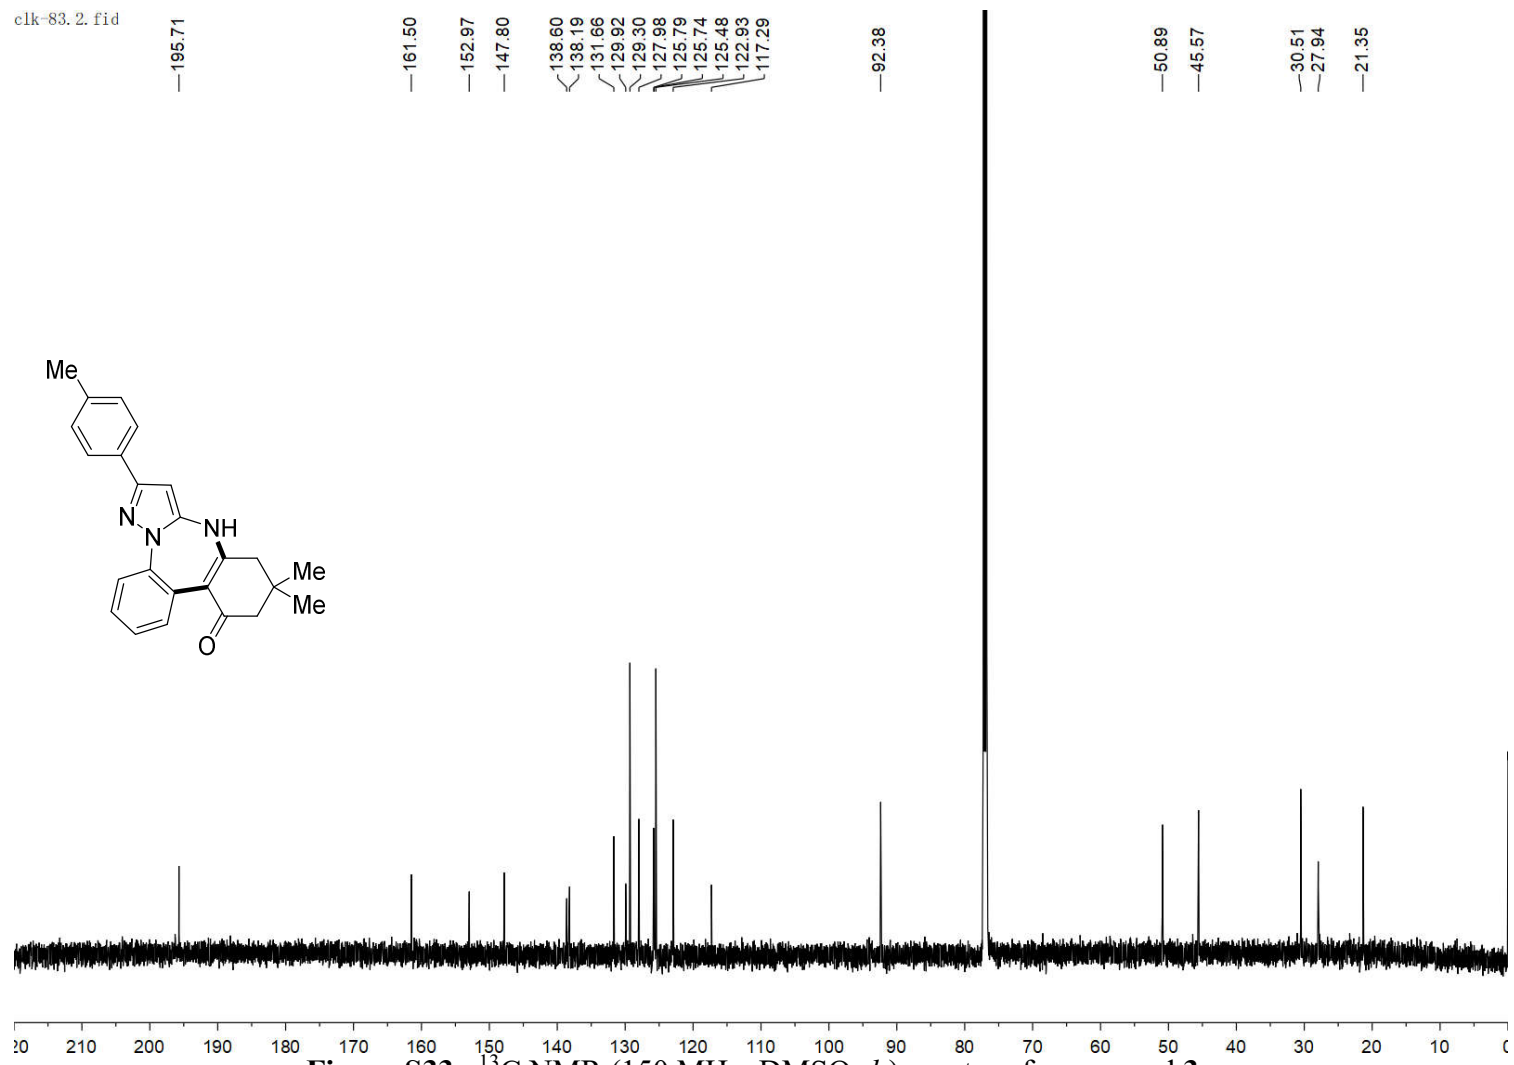

clk-86.1.fid

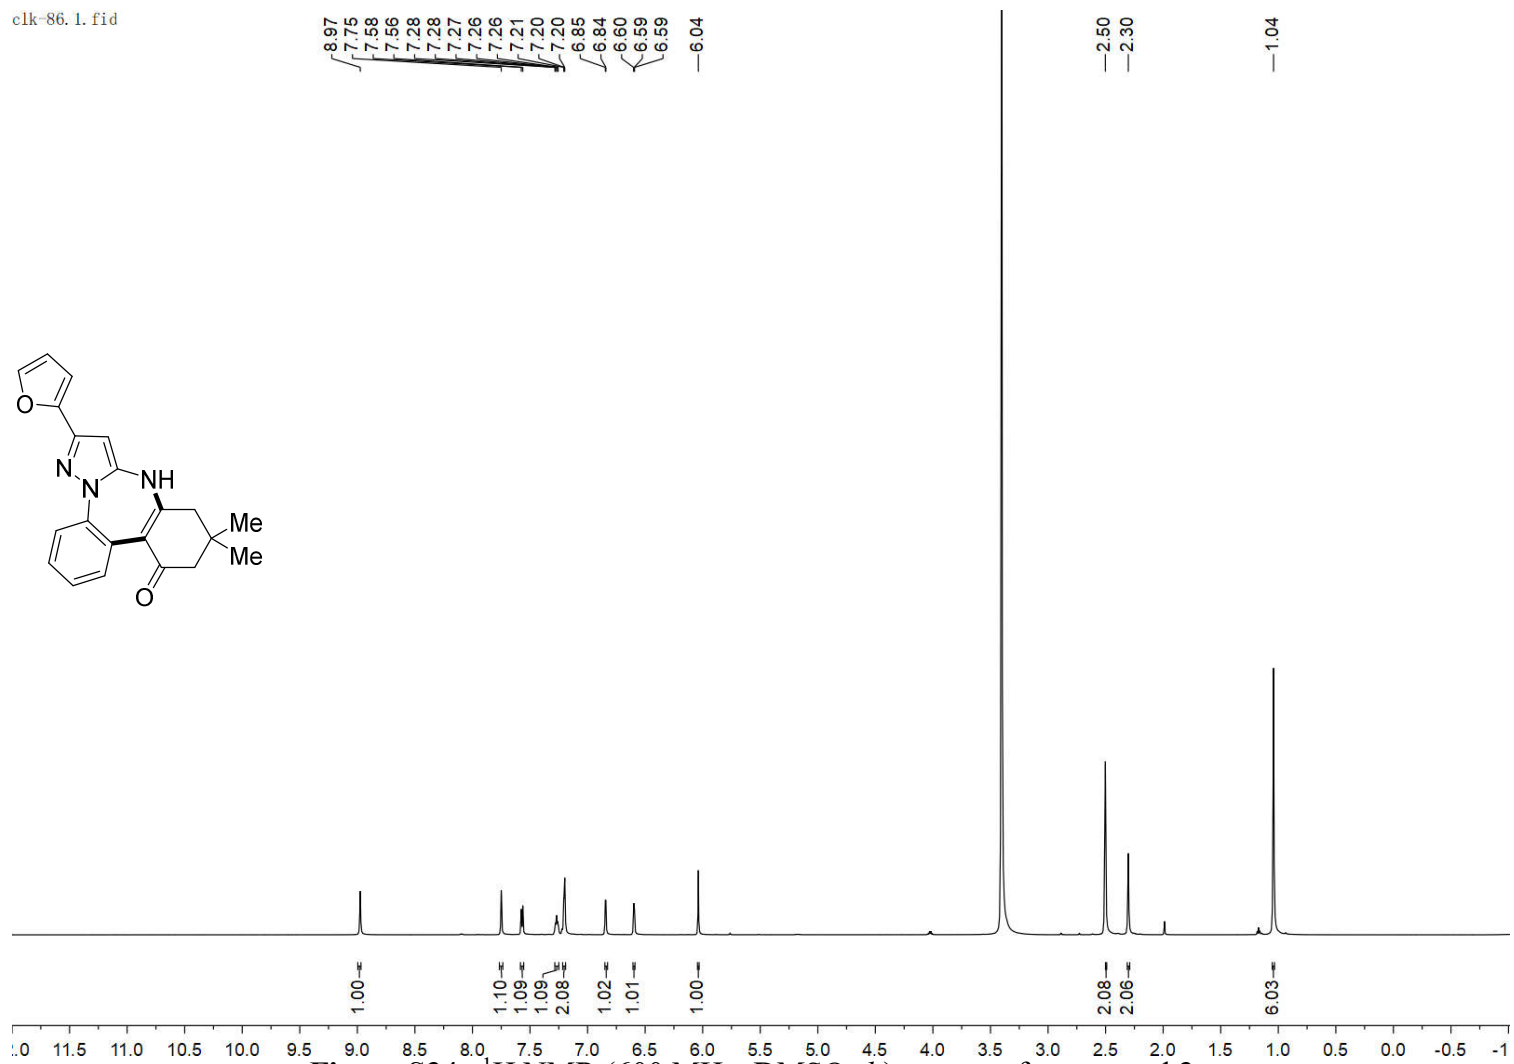

Figure S34. <sup>1</sup>H NMR (600 MHz, DMSO-*d*<sub>6</sub>) spectra of compound 3p

clk-86.2.fid

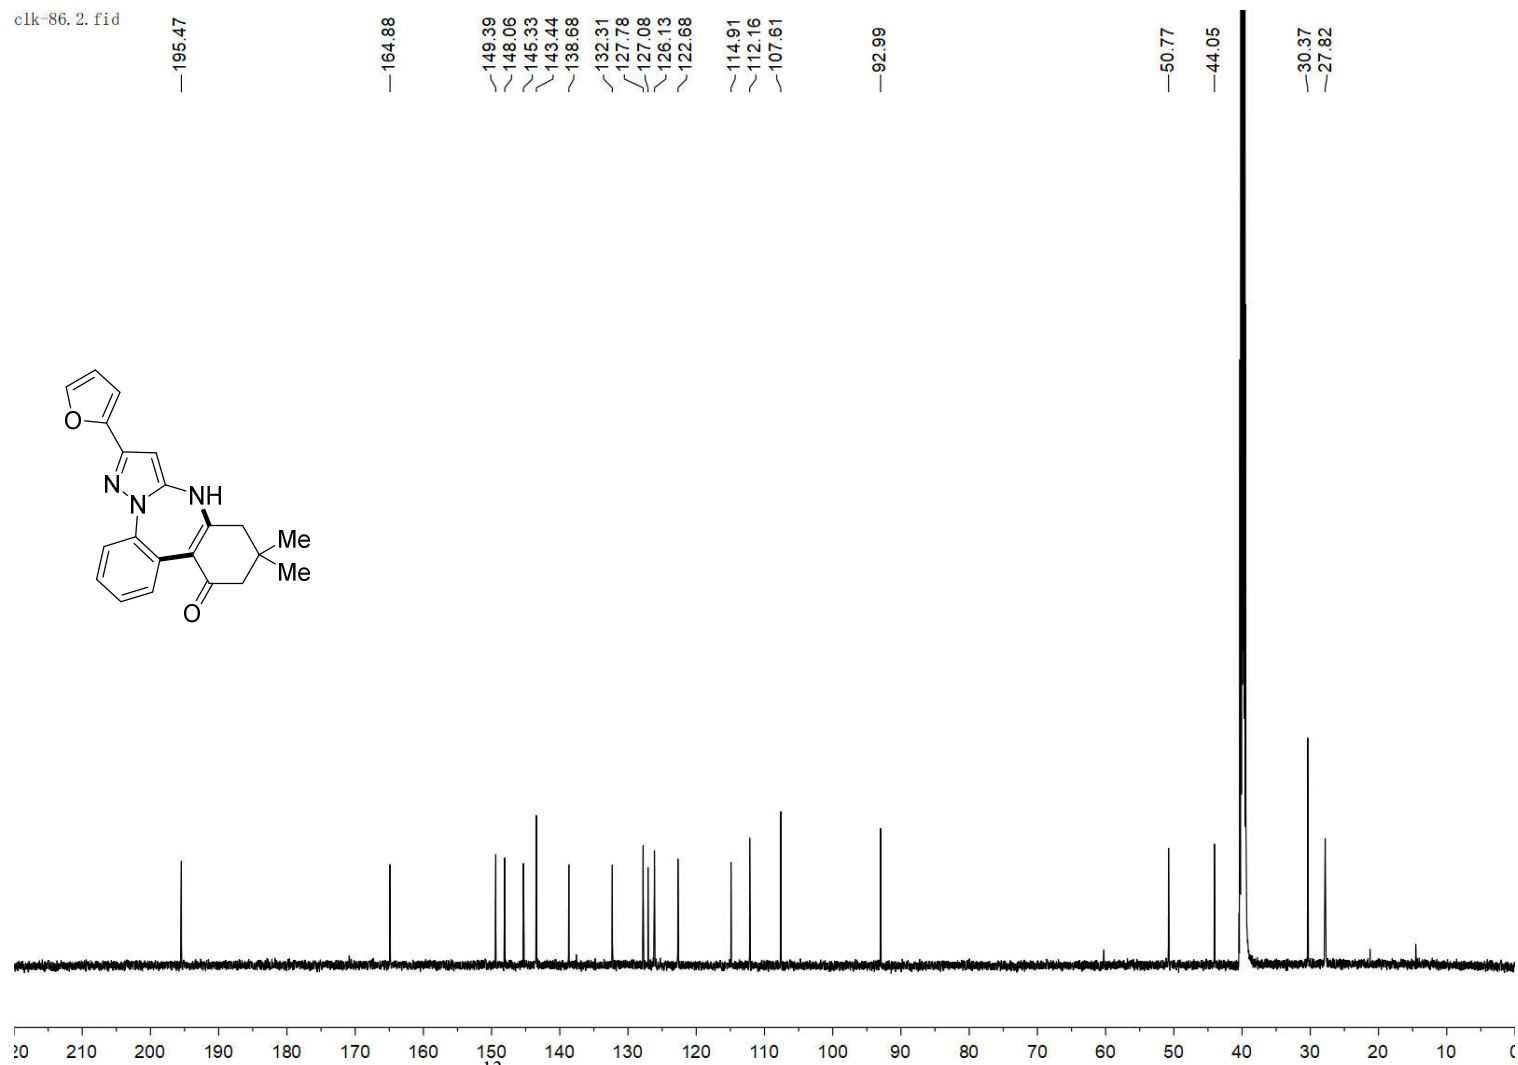

Figure S35. <sup>13</sup>C NMR (150 MHz, DMSO-*d*<sub>6</sub>) spectra of compound 3p

CLK-91.3.fid

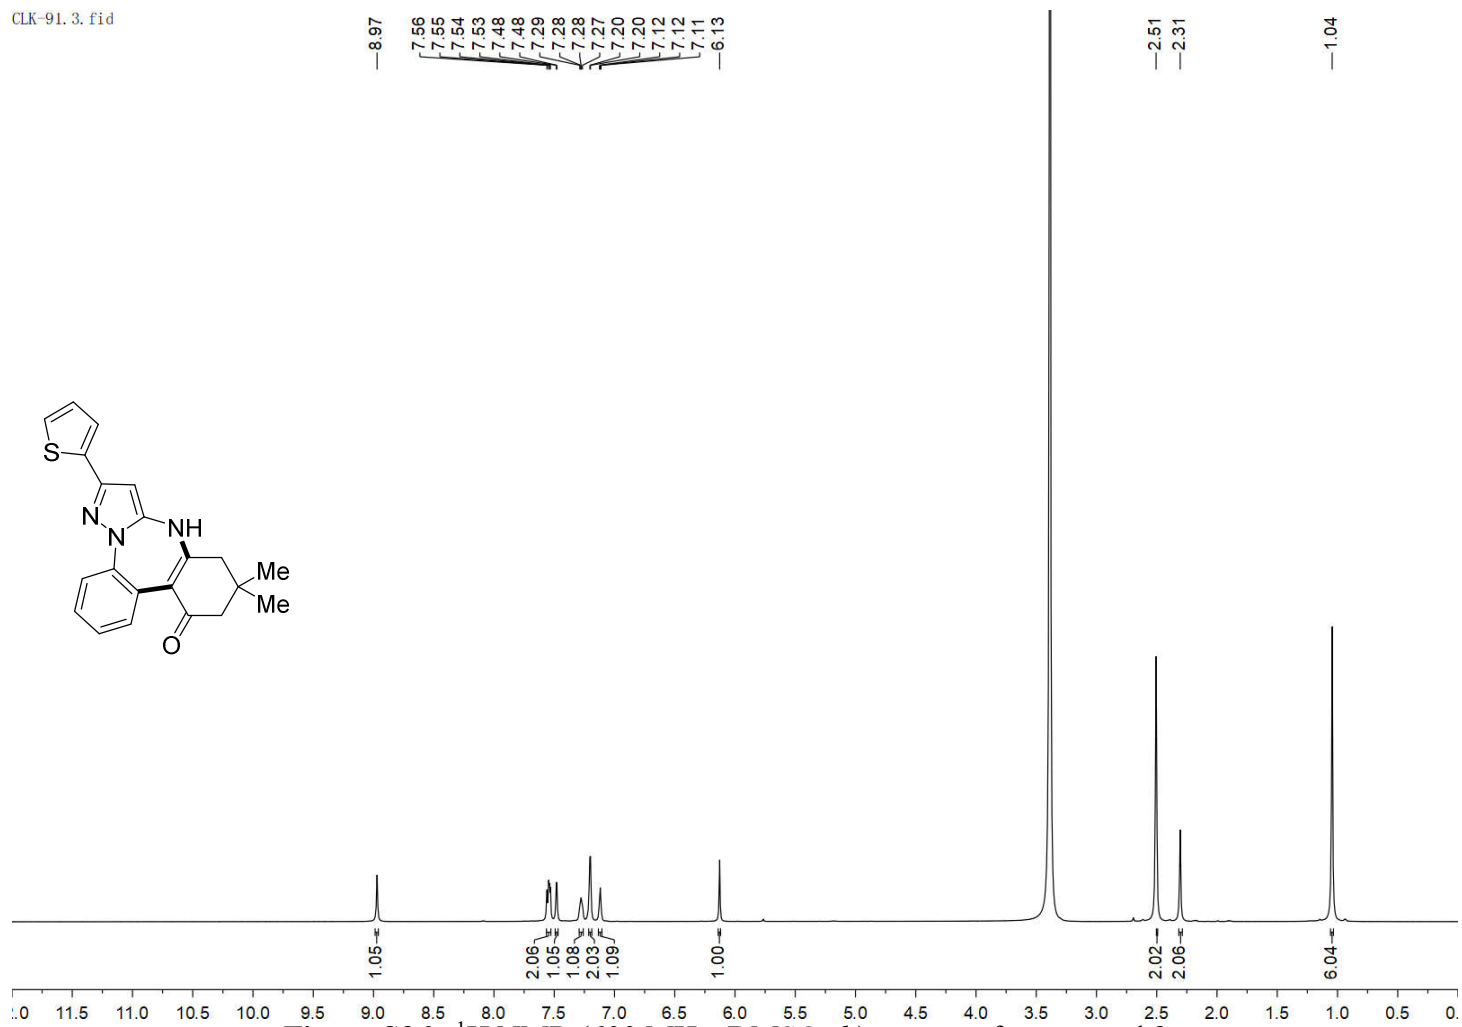

Figure S36.  $^1\text{H NMR}$  (600 MHz,  $\text{DMSO-}d_6$ ) spectra of compound **3q**

CLK-91.4.fid

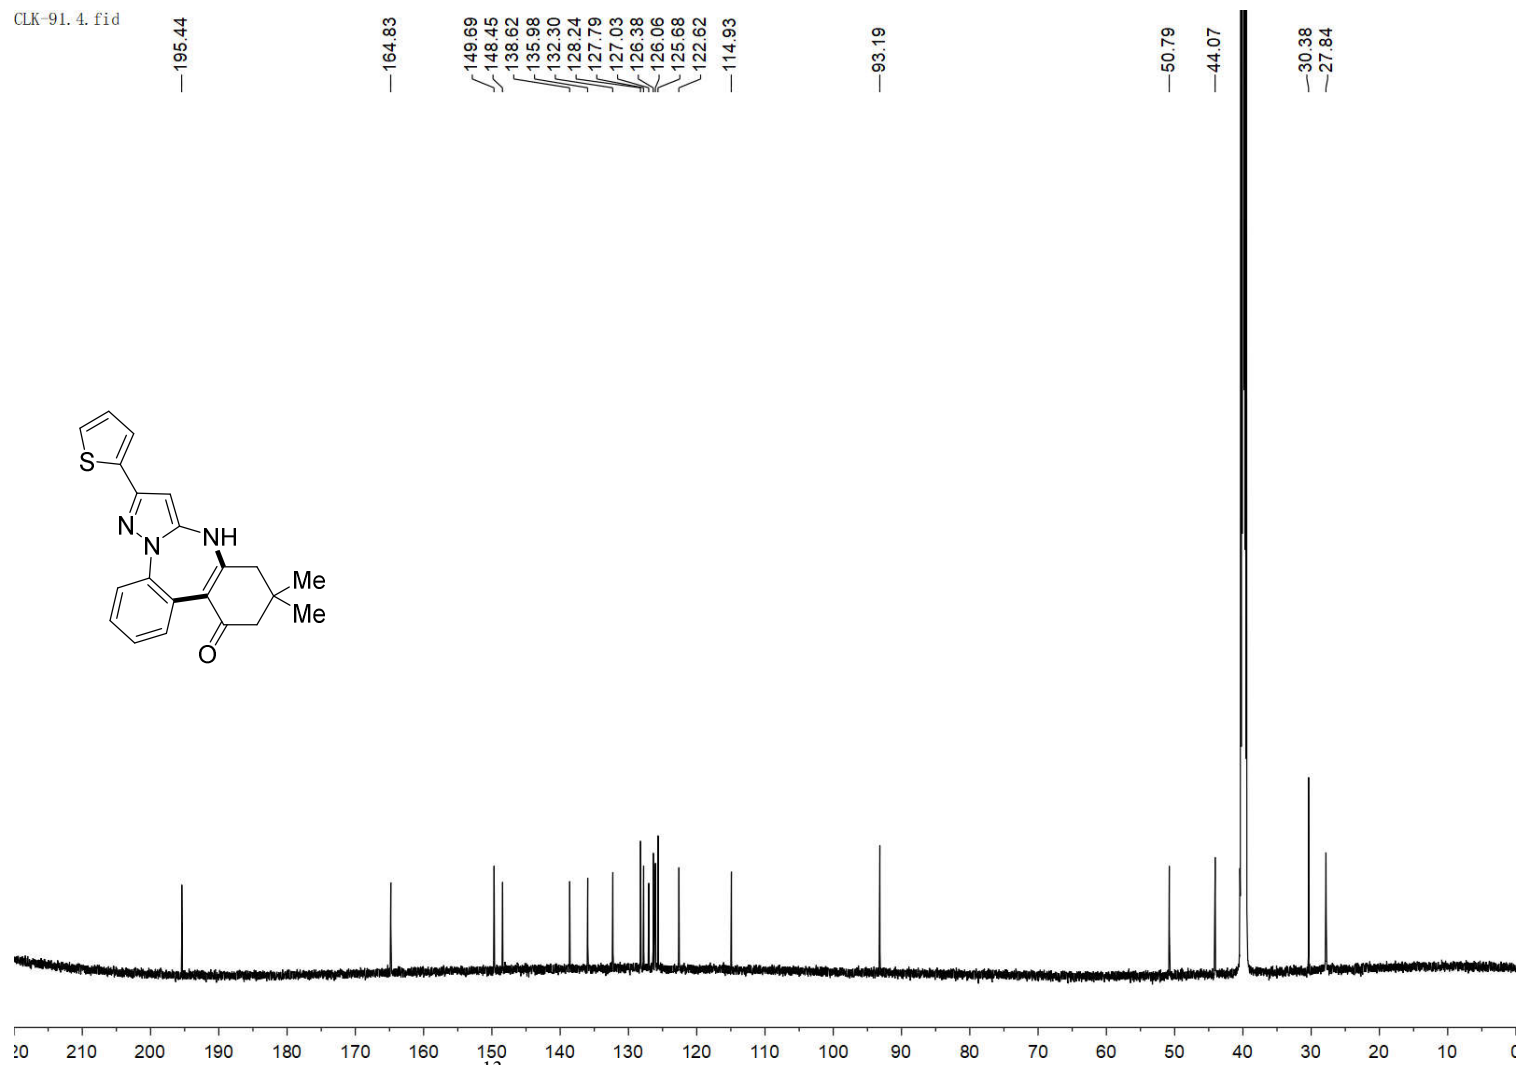

Figure S37. <sup>13</sup>C NMR (150 MHz, DMSO-*d*<sub>6</sub>) spectra of compound 3q

clk-63. 1. fid

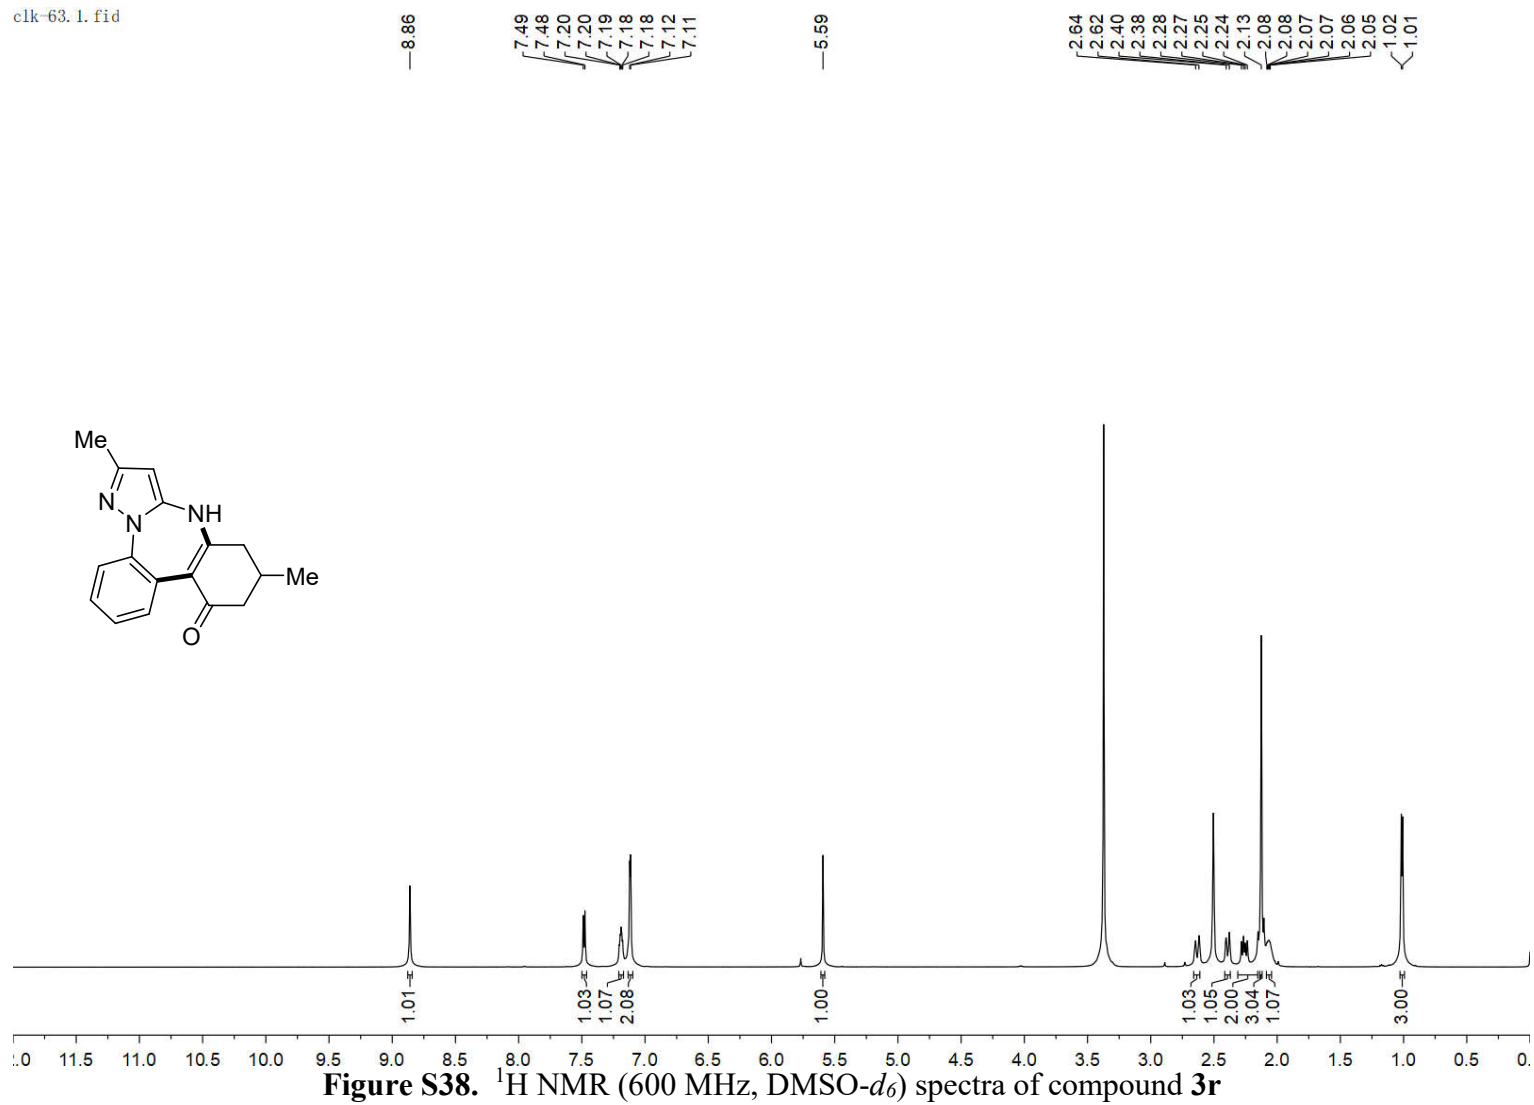

clk-63.2.fid

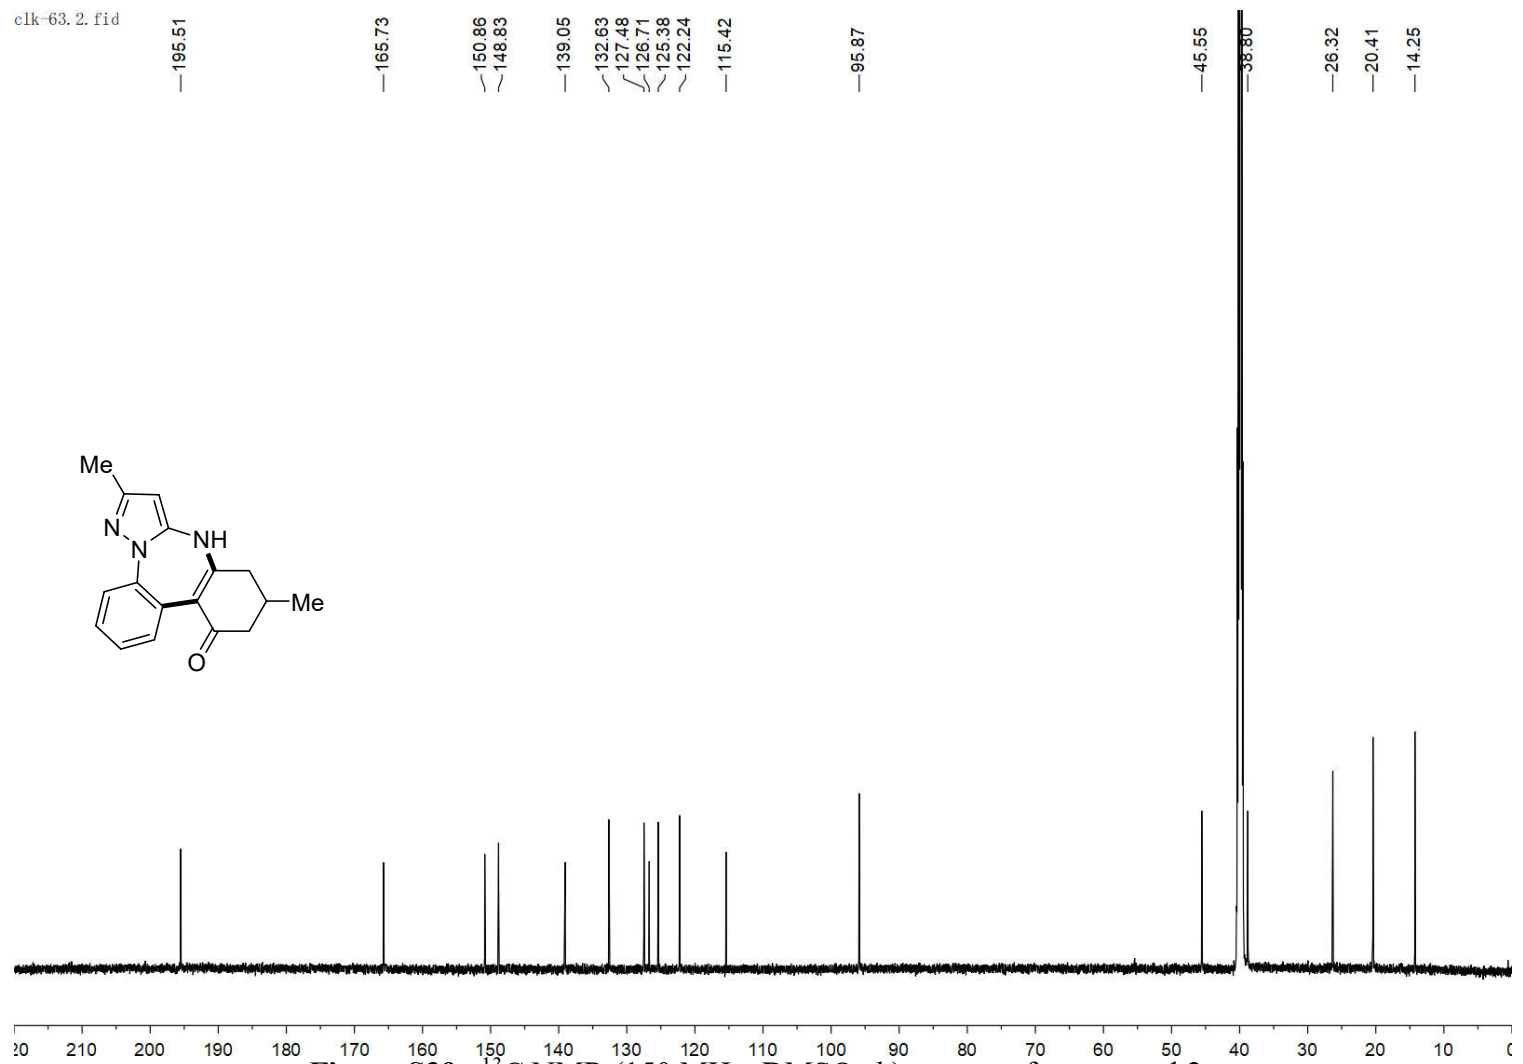

Figure S39.  $^{13}\text{C}$  NMR (150 MHz,  $\text{DMSO-}d_6$ ) spectra of compound 3r



clk-59.1.fid

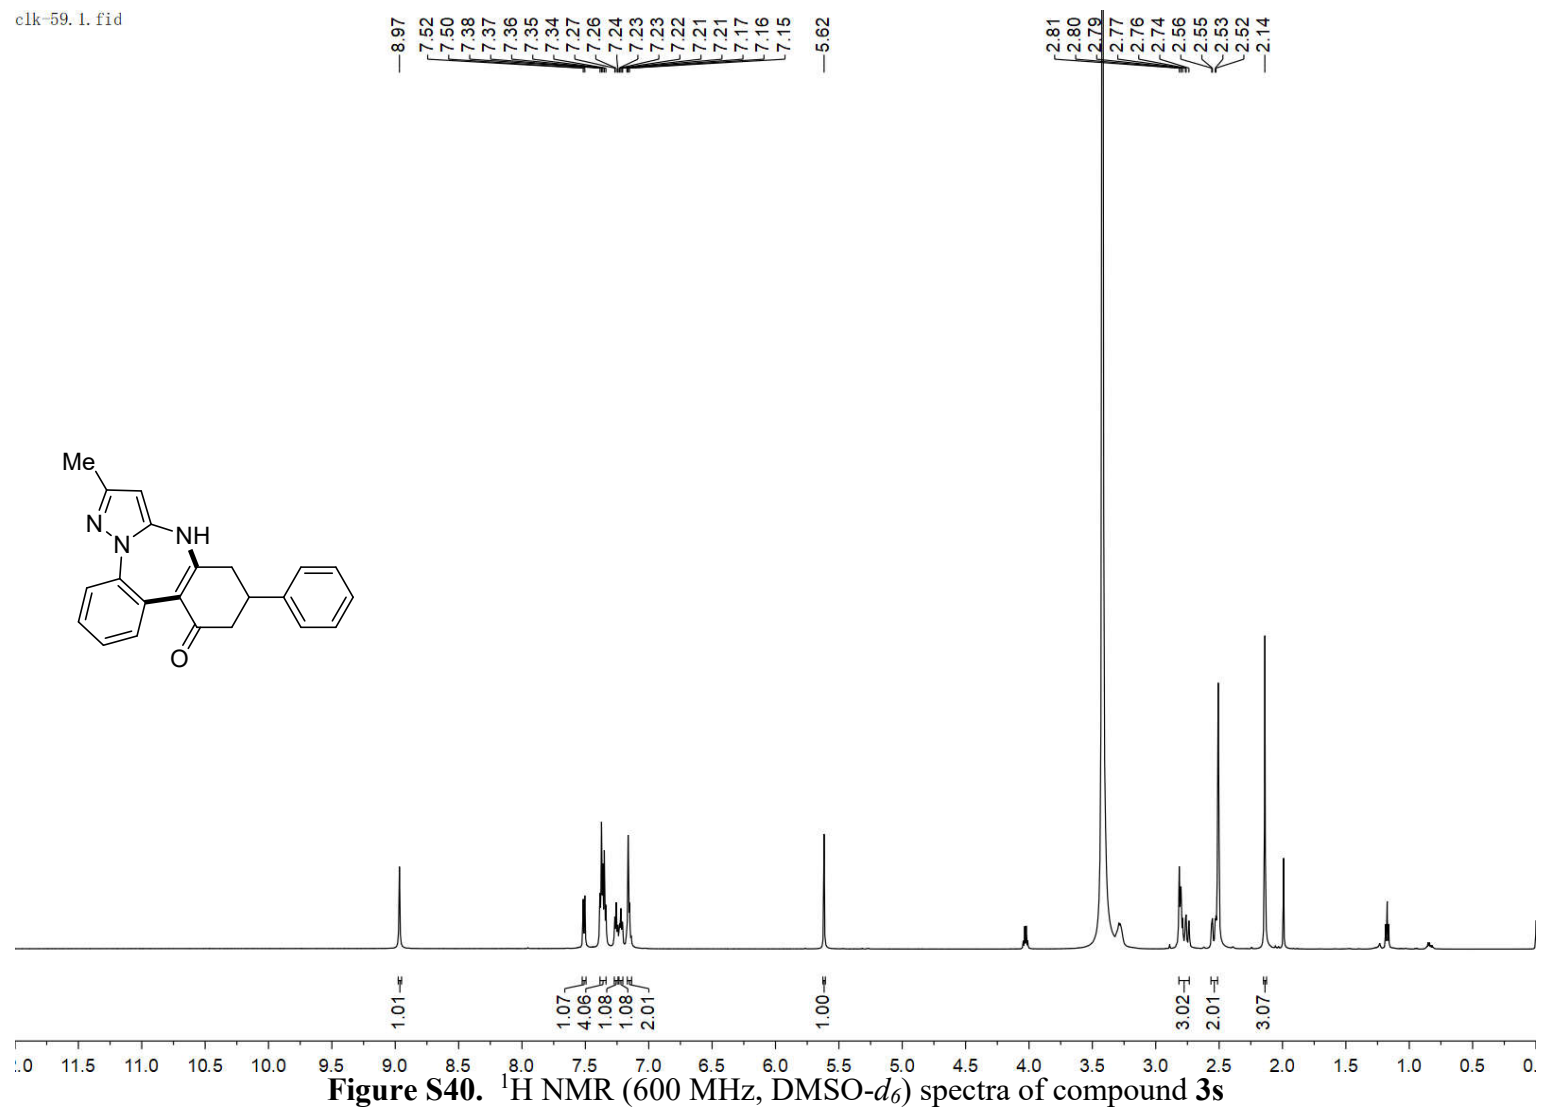

CLK-59-1.4.fid

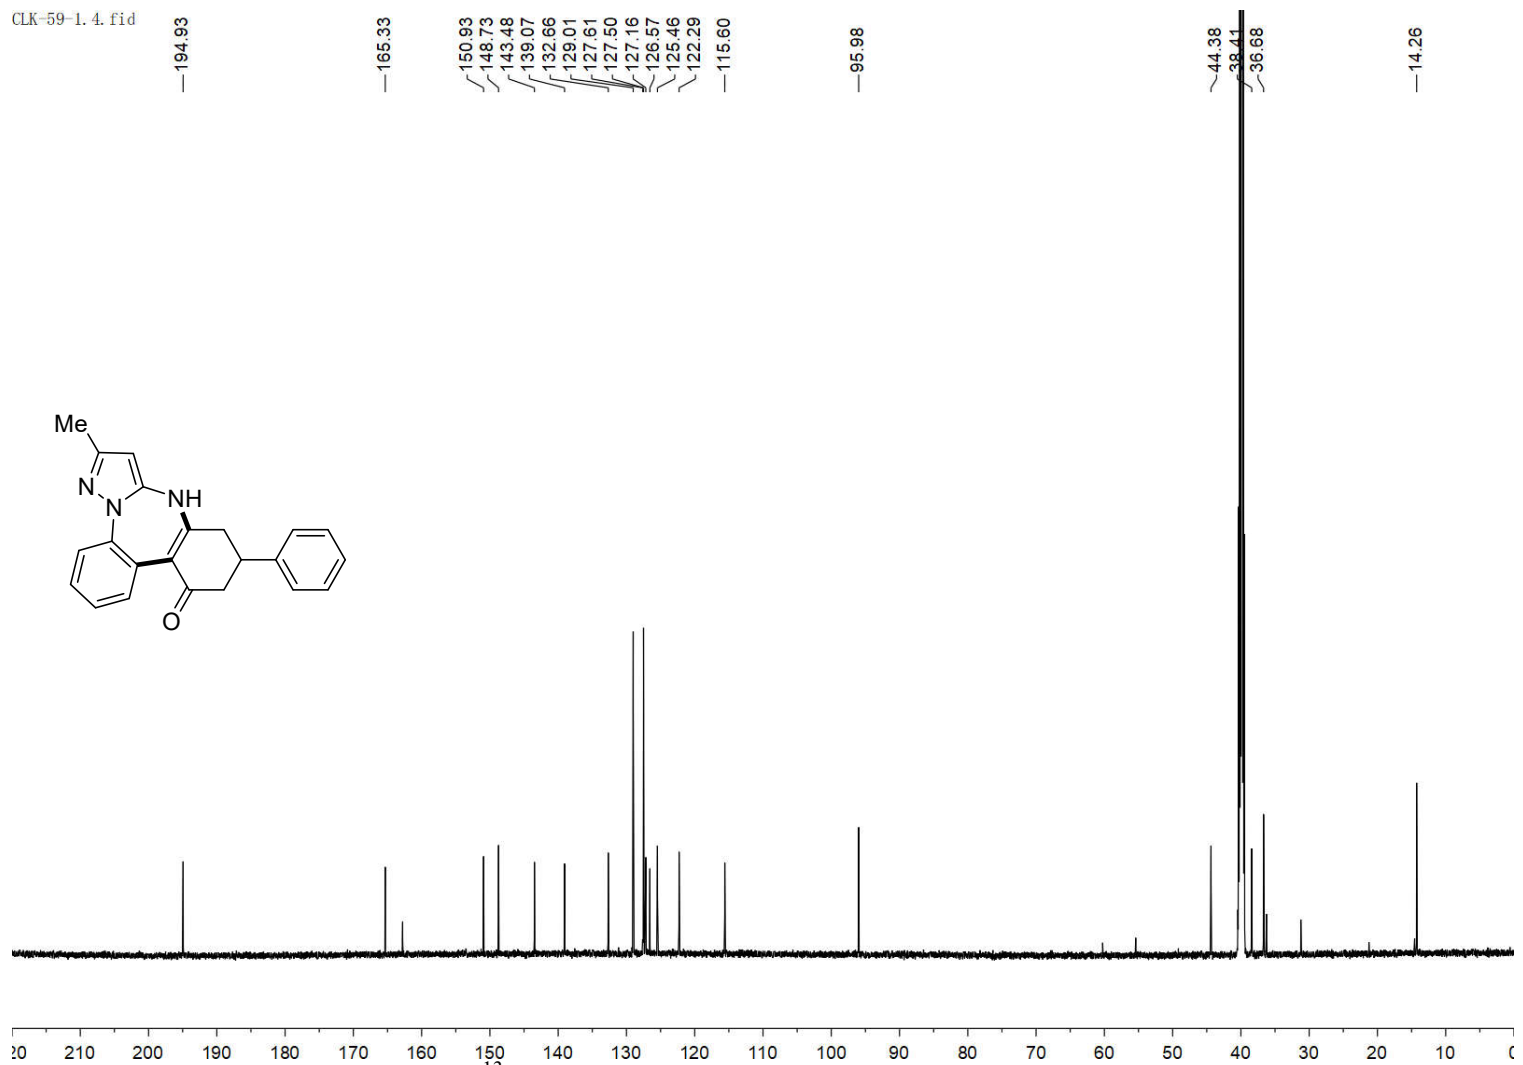

Figure S41.  $^{13}\text{C}$  NMR (150 MHz,  $\text{DMSO-}d_6$ ) spectra of compound 3s

clk-60.1.fid

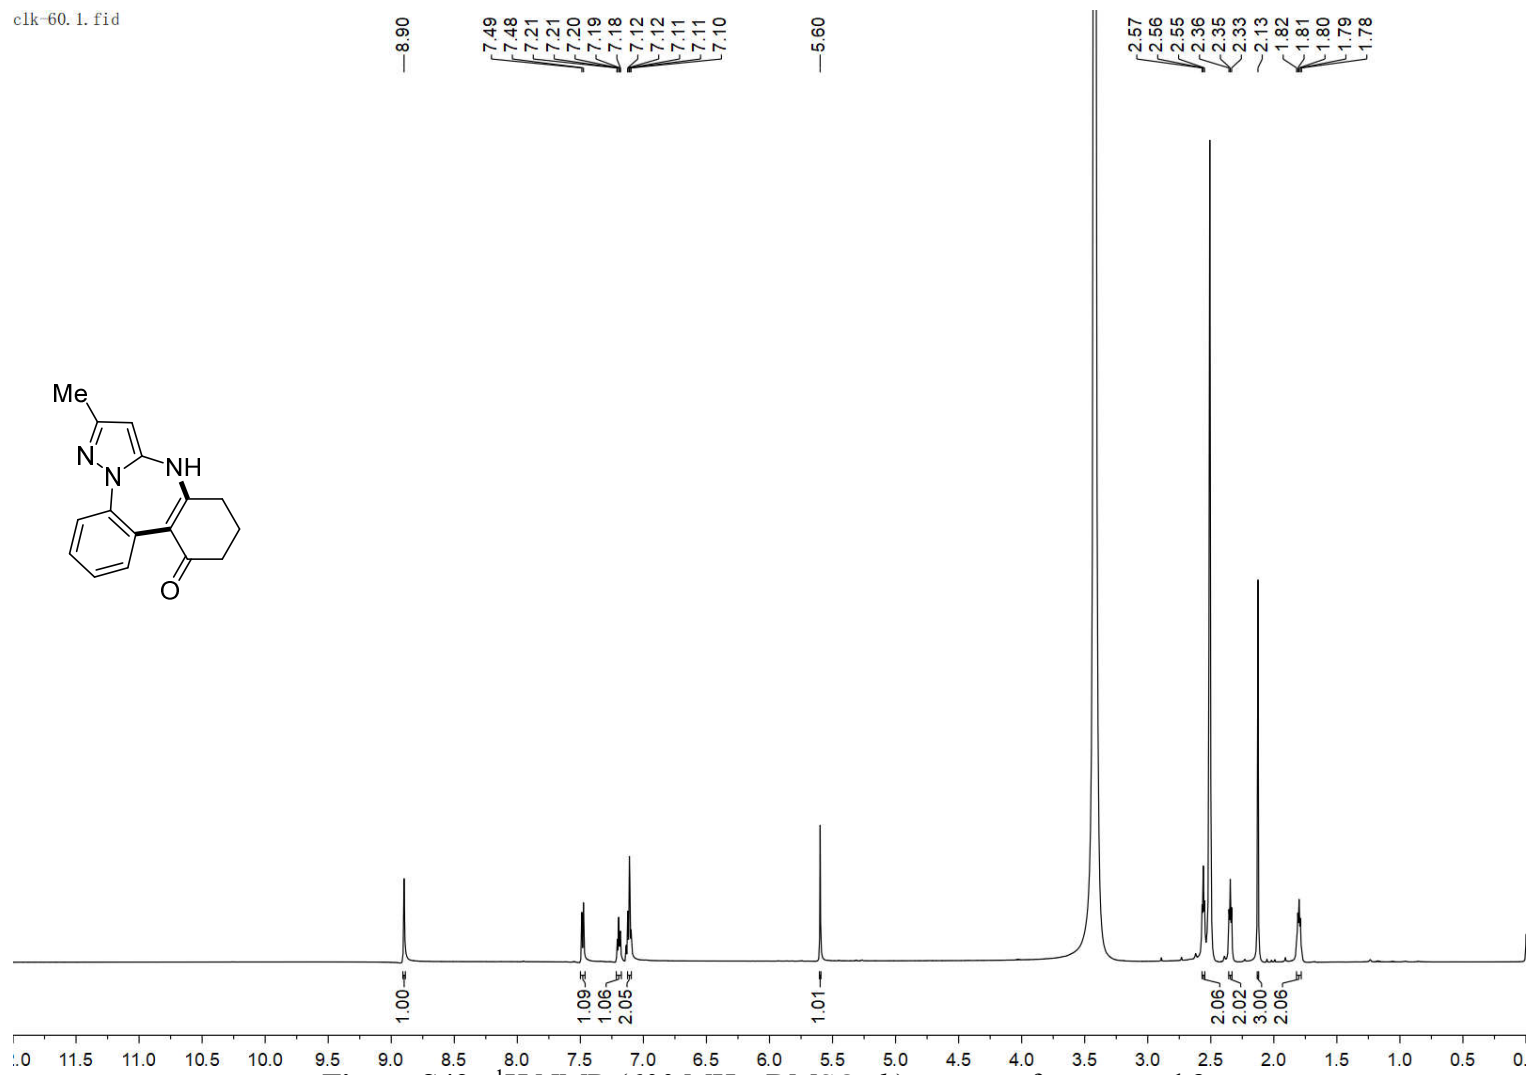

clk-62.2.fid

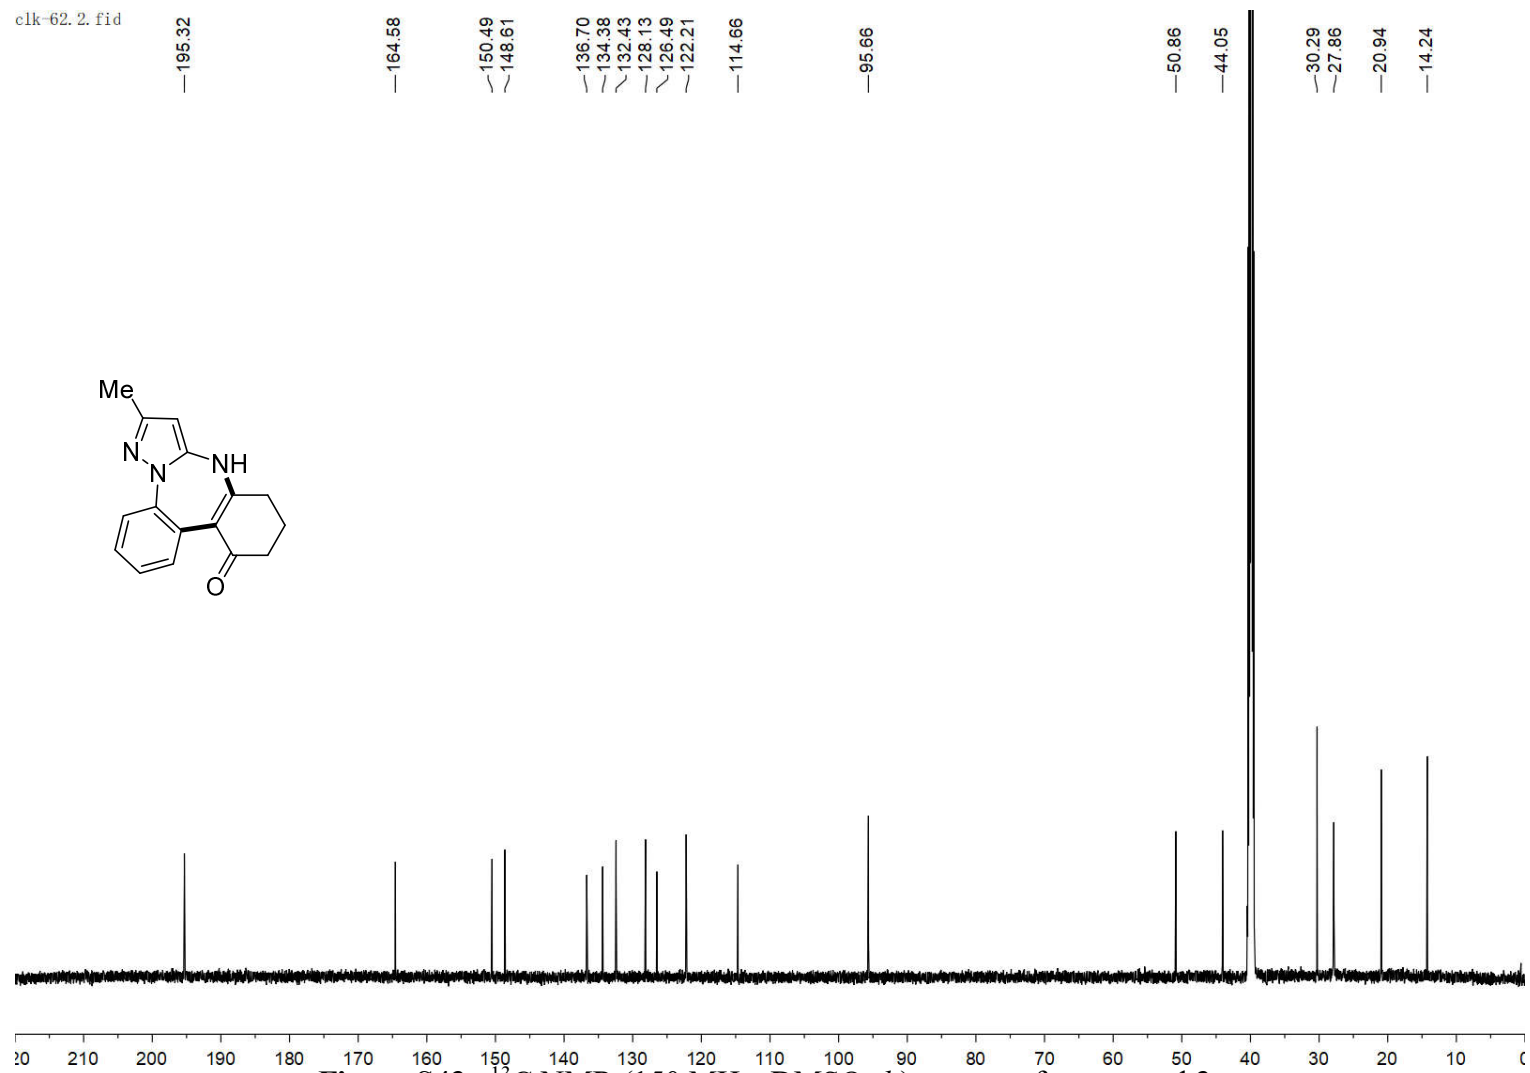

Figure S43. <sup>13</sup>C NMR (150 MHz, DMSO-*d*<sub>6</sub>) spectra of compound 3t

clk-65.1.fid

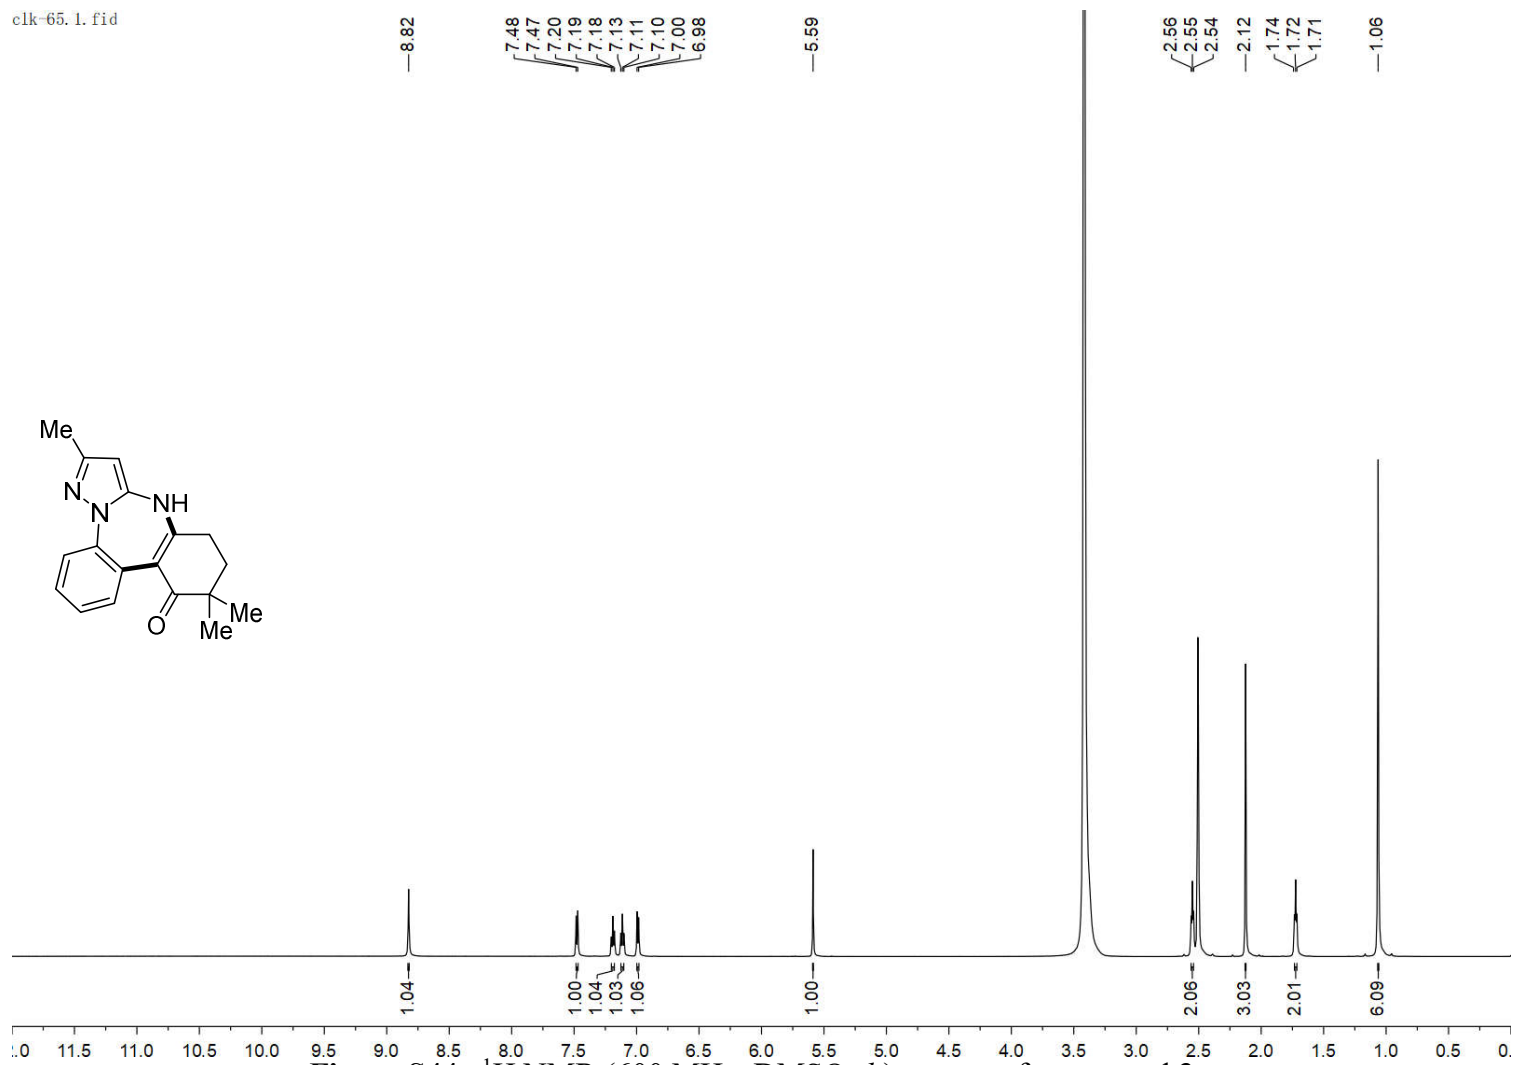

Figure S44. <sup>1</sup>H NMR (600 MHz, DMSO-*d*<sub>6</sub>) spectra of compound **3u**

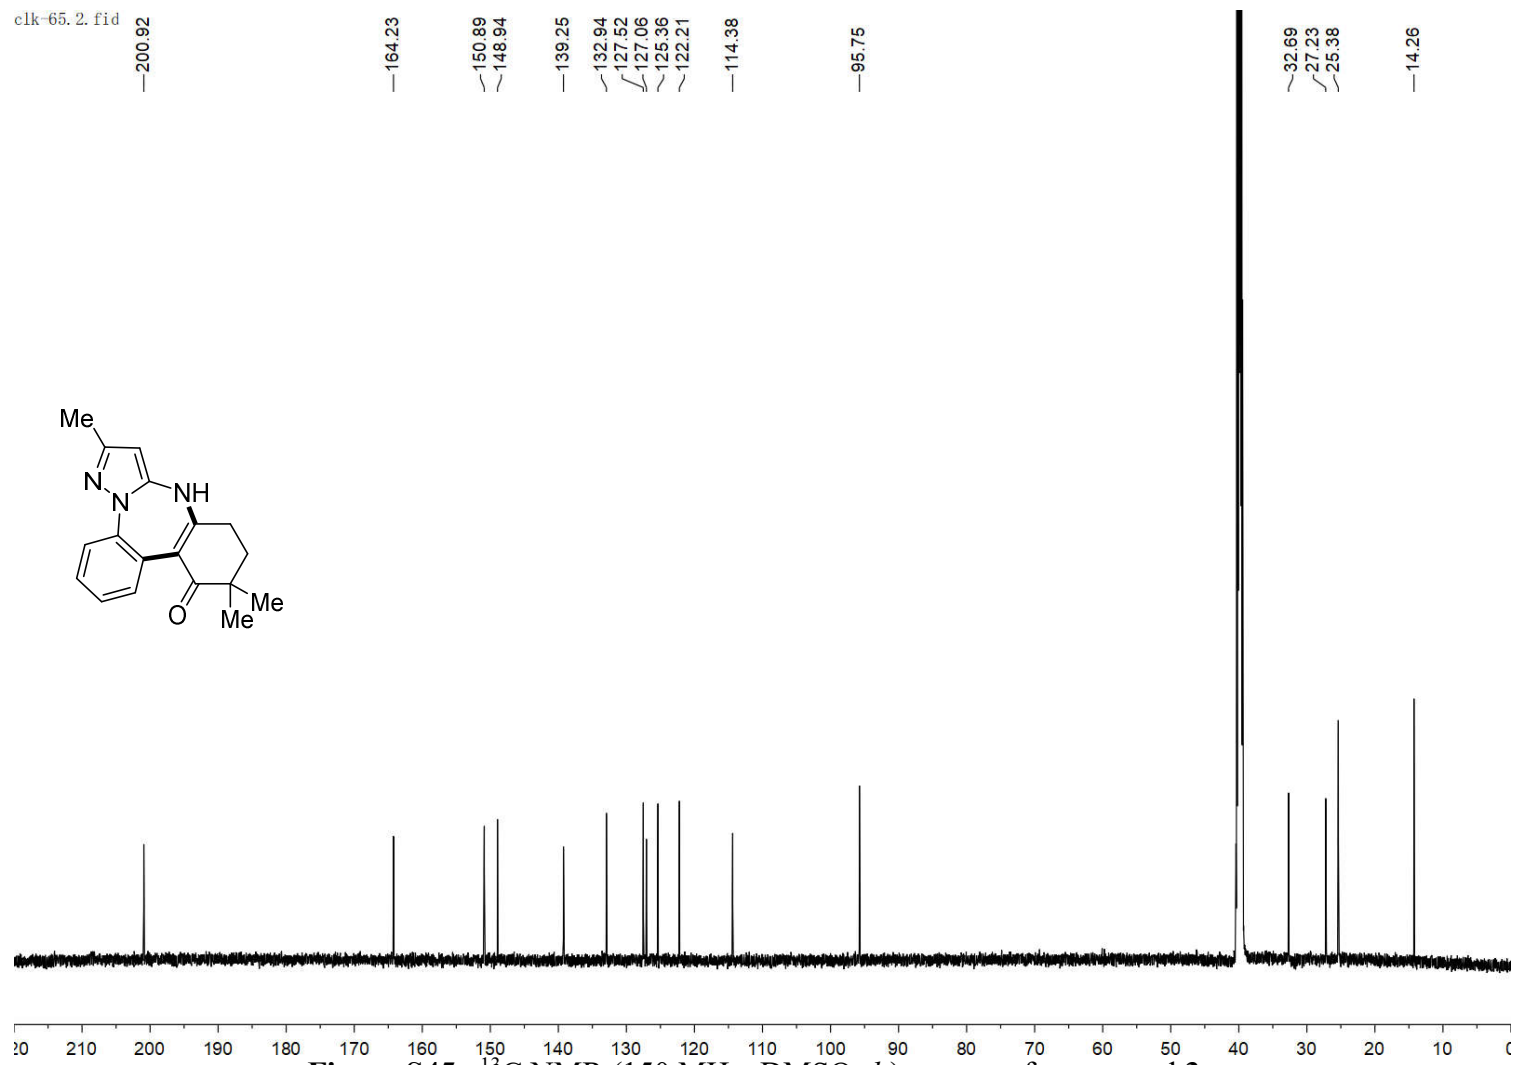

clk-85.1.fid

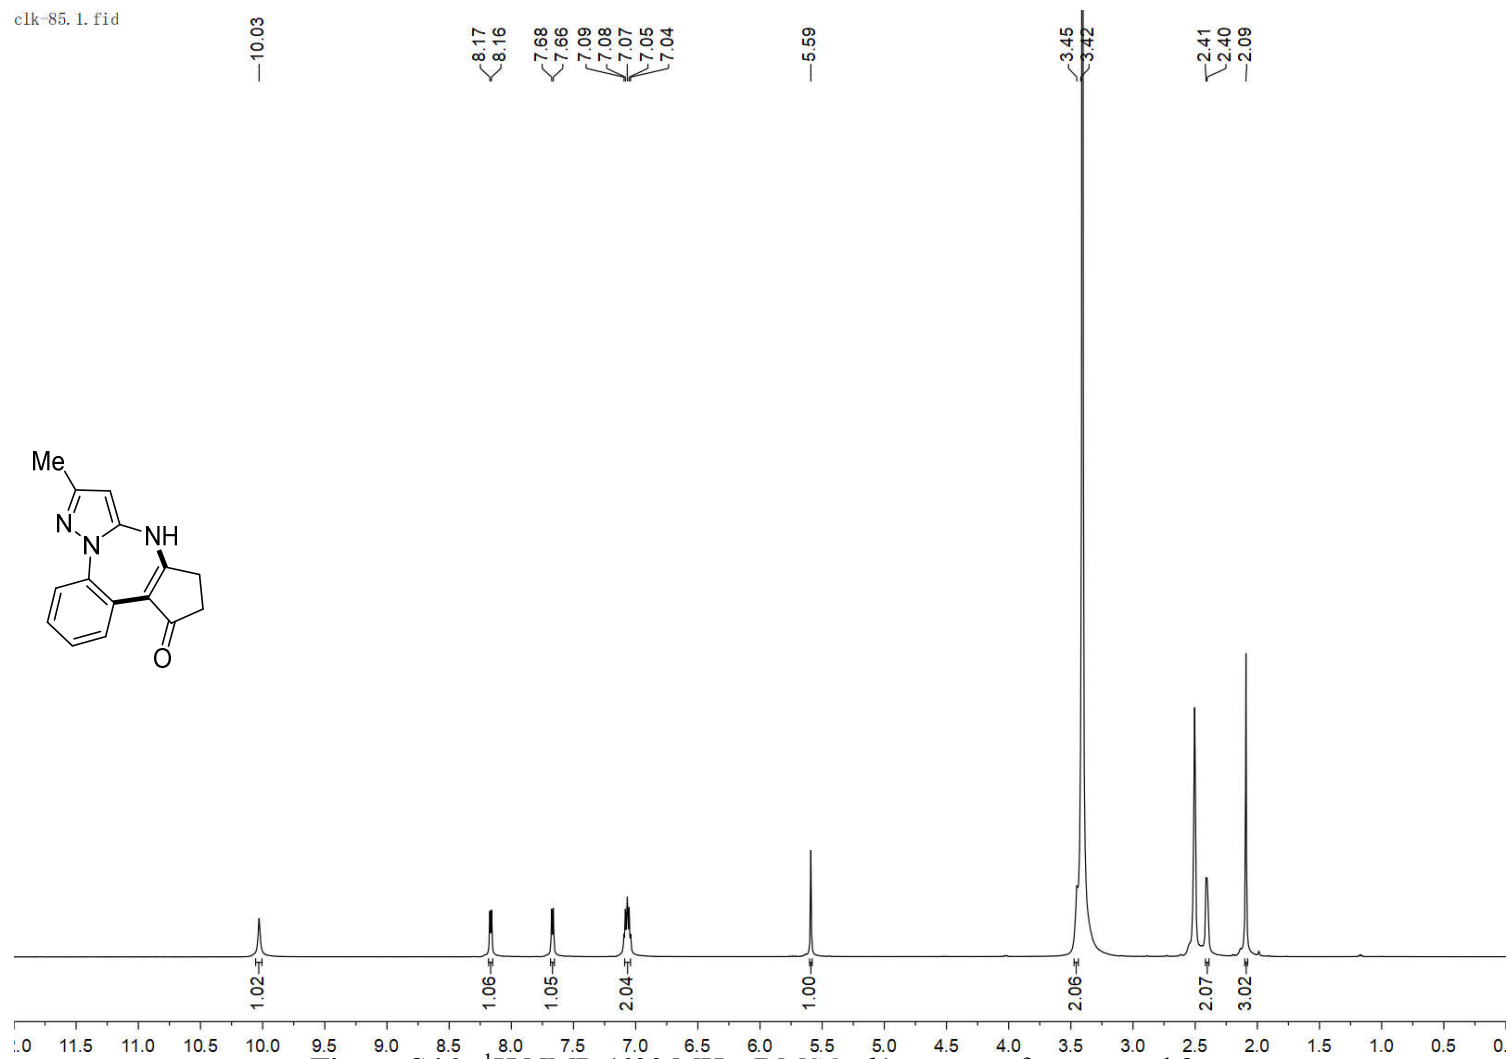

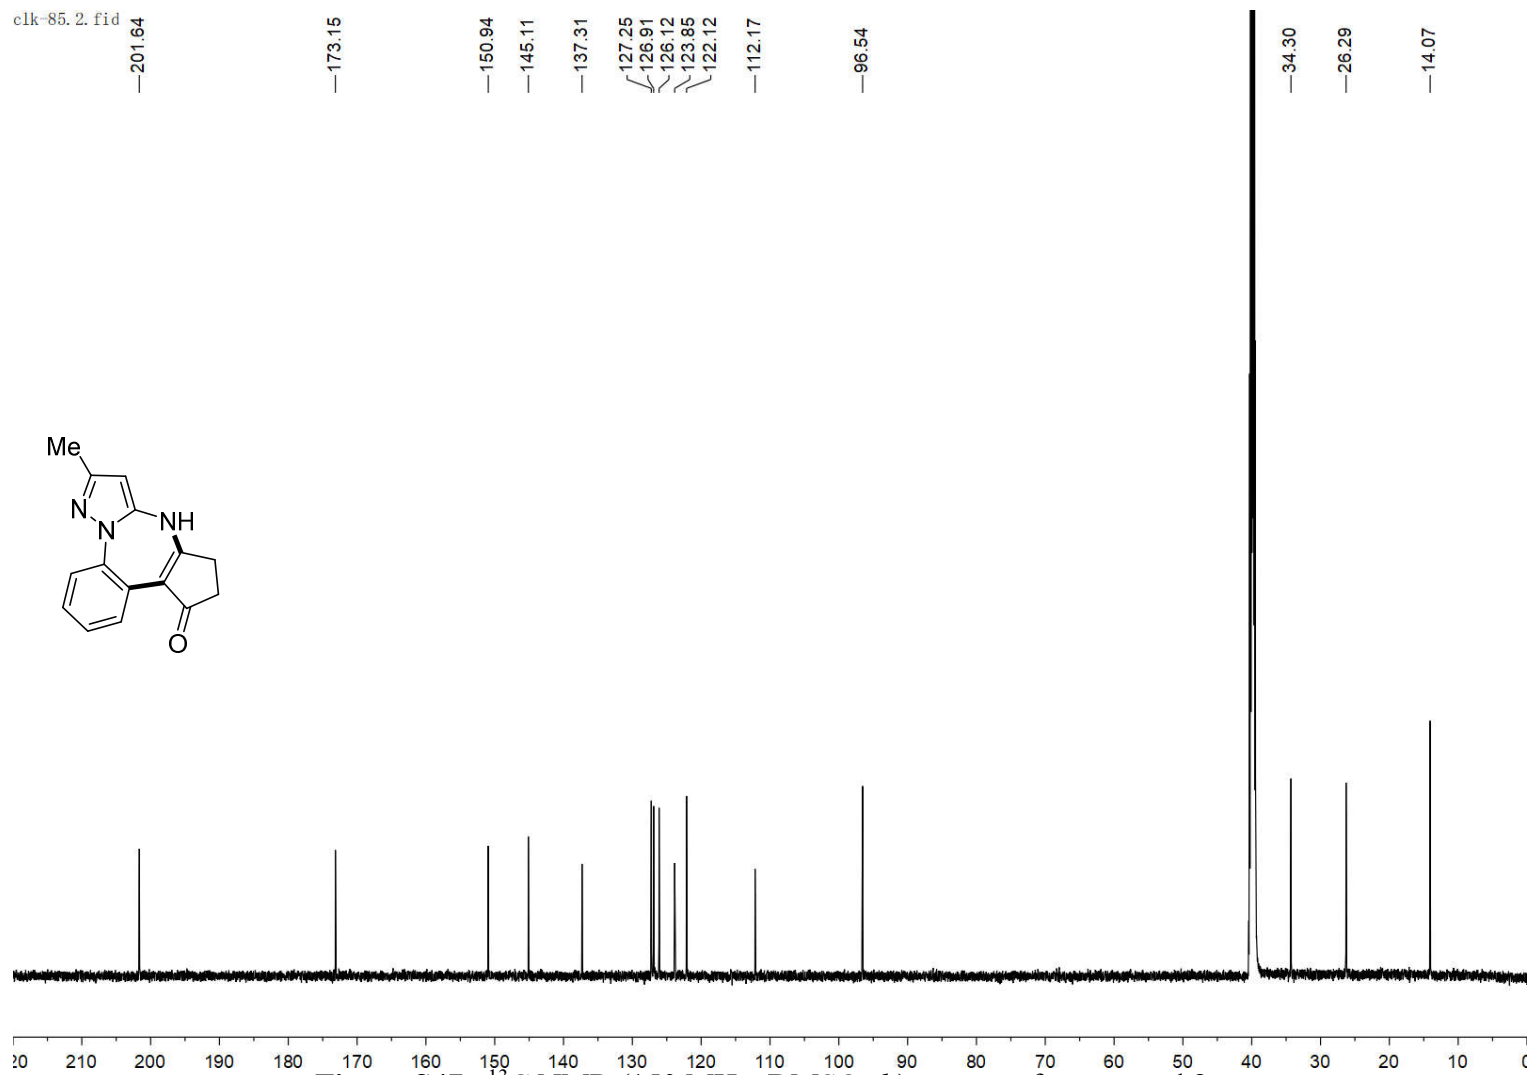



clk-89.1.fid

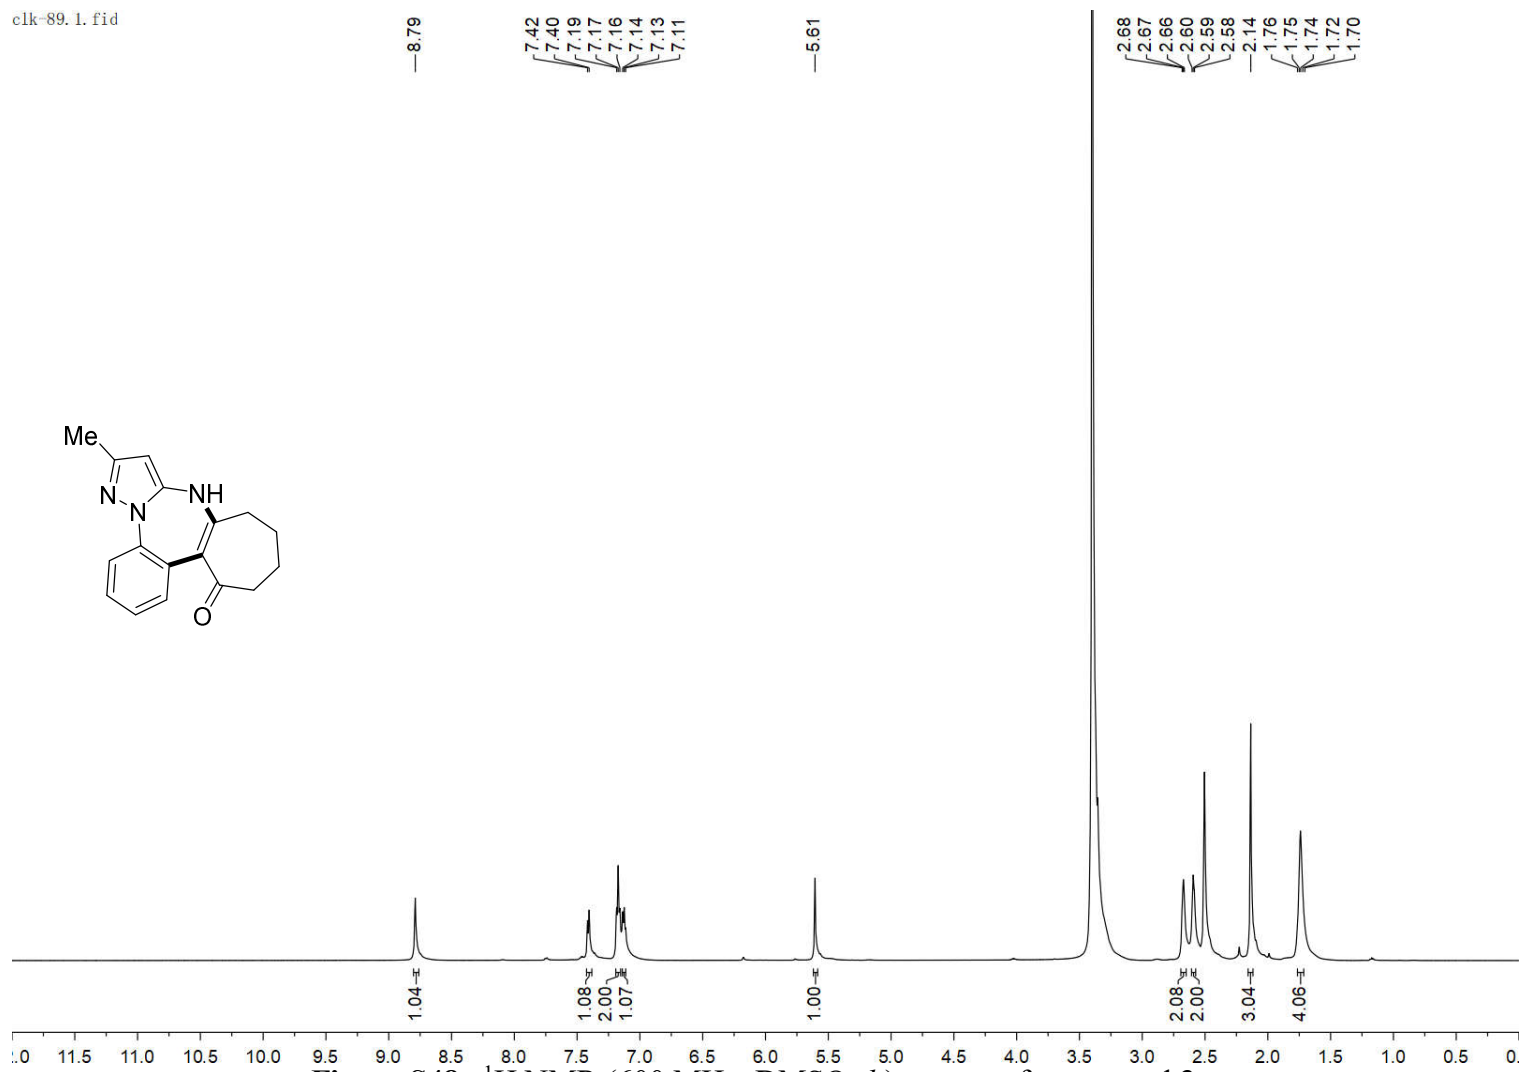

**Figure S48.**  $^1\text{H NMR}$  (600 MHz,  $\text{DMSO-}d_6$ ) spectra of compound **3w**

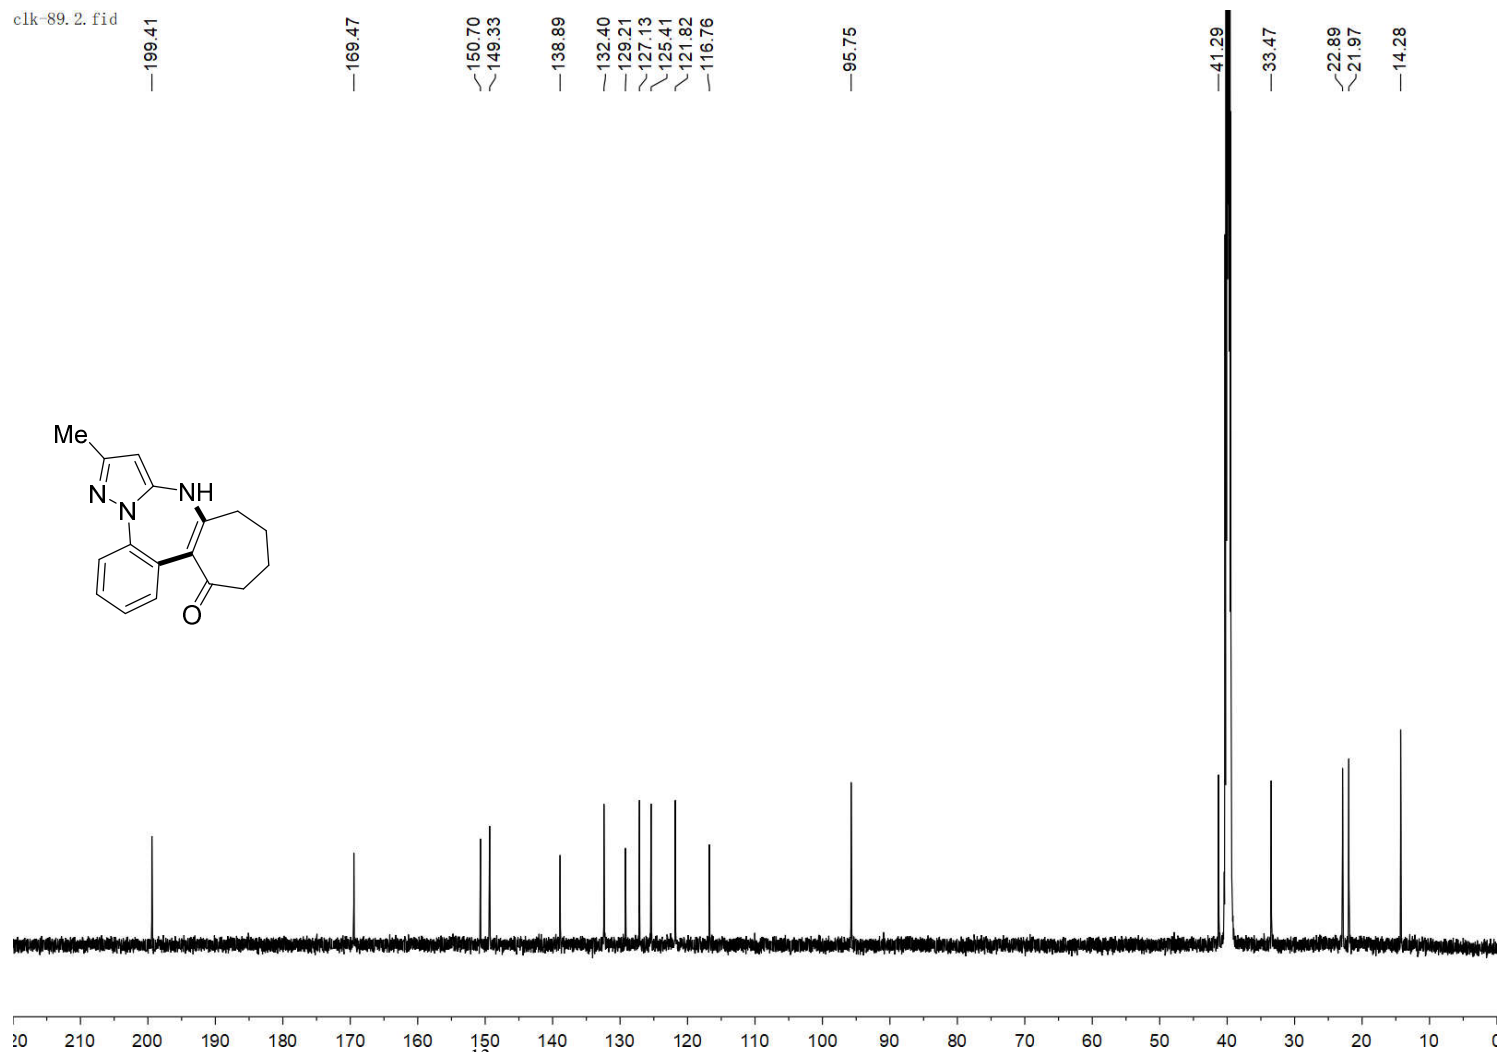

Figure S49.  $^{13}\text{C}$  NMR (150 MHz,  $\text{DMSO-}d_6$ ) spectra of compound **3w**

clk-88.1.fid

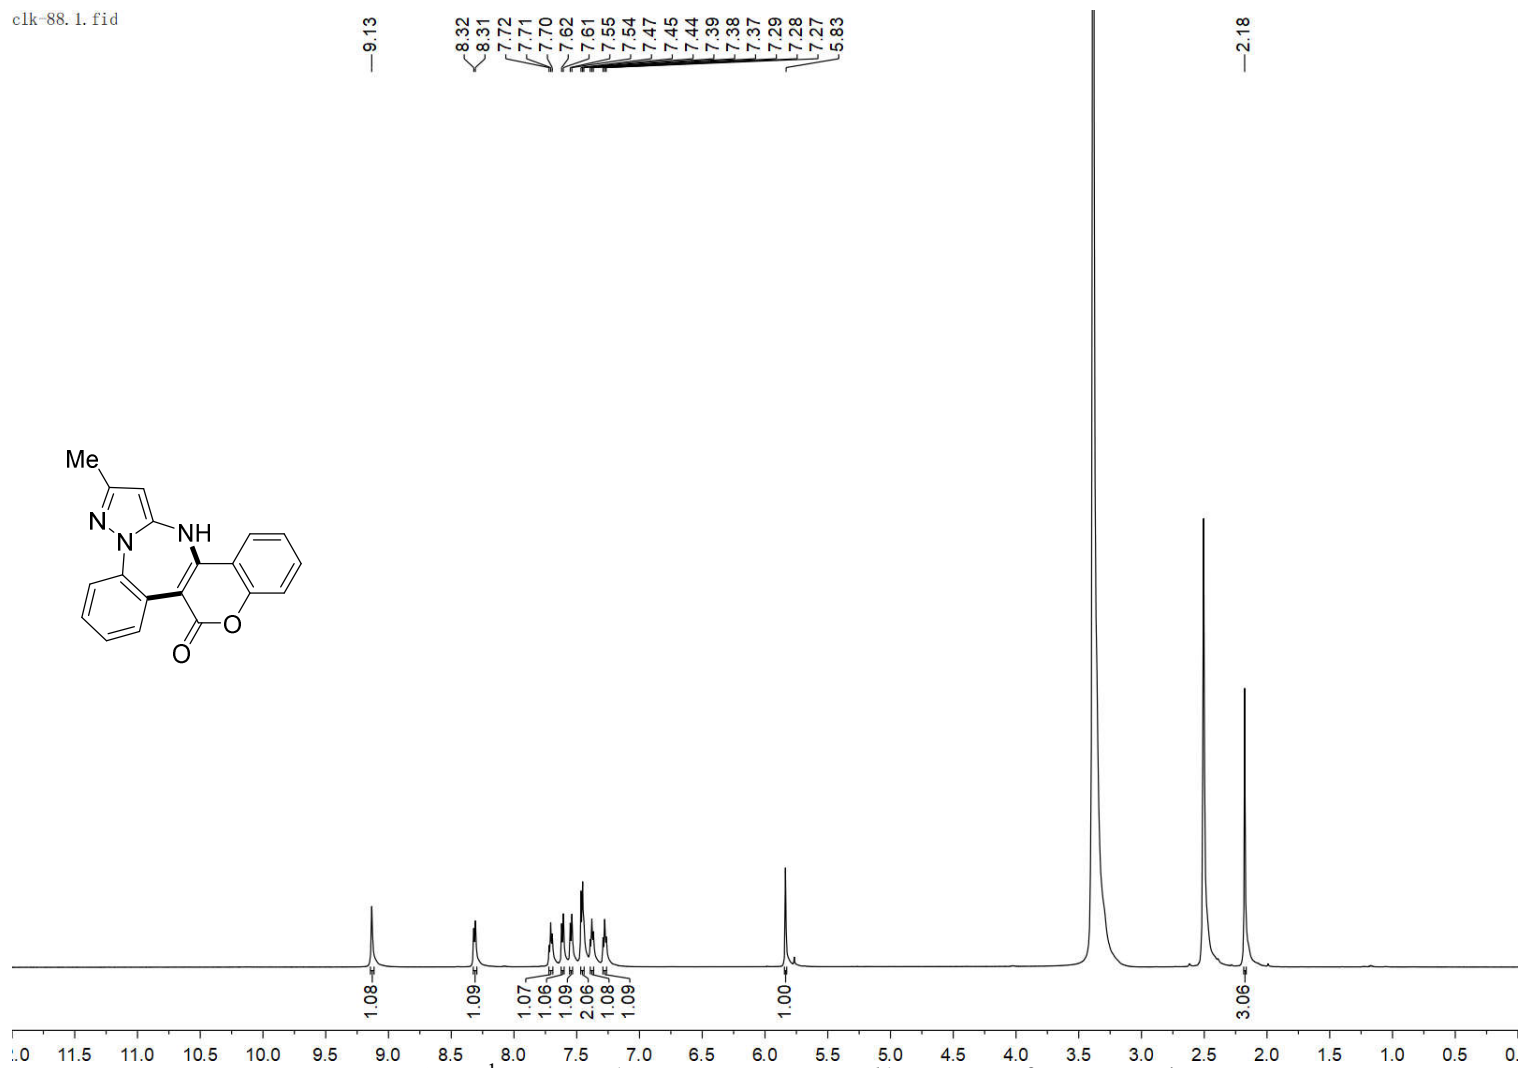

Figure S50.  $^1\text{H}$  NMR (600 MHz,  $\text{DMSO-}d_6$ ) spectra of compound **3x**

clk-88.2.fid

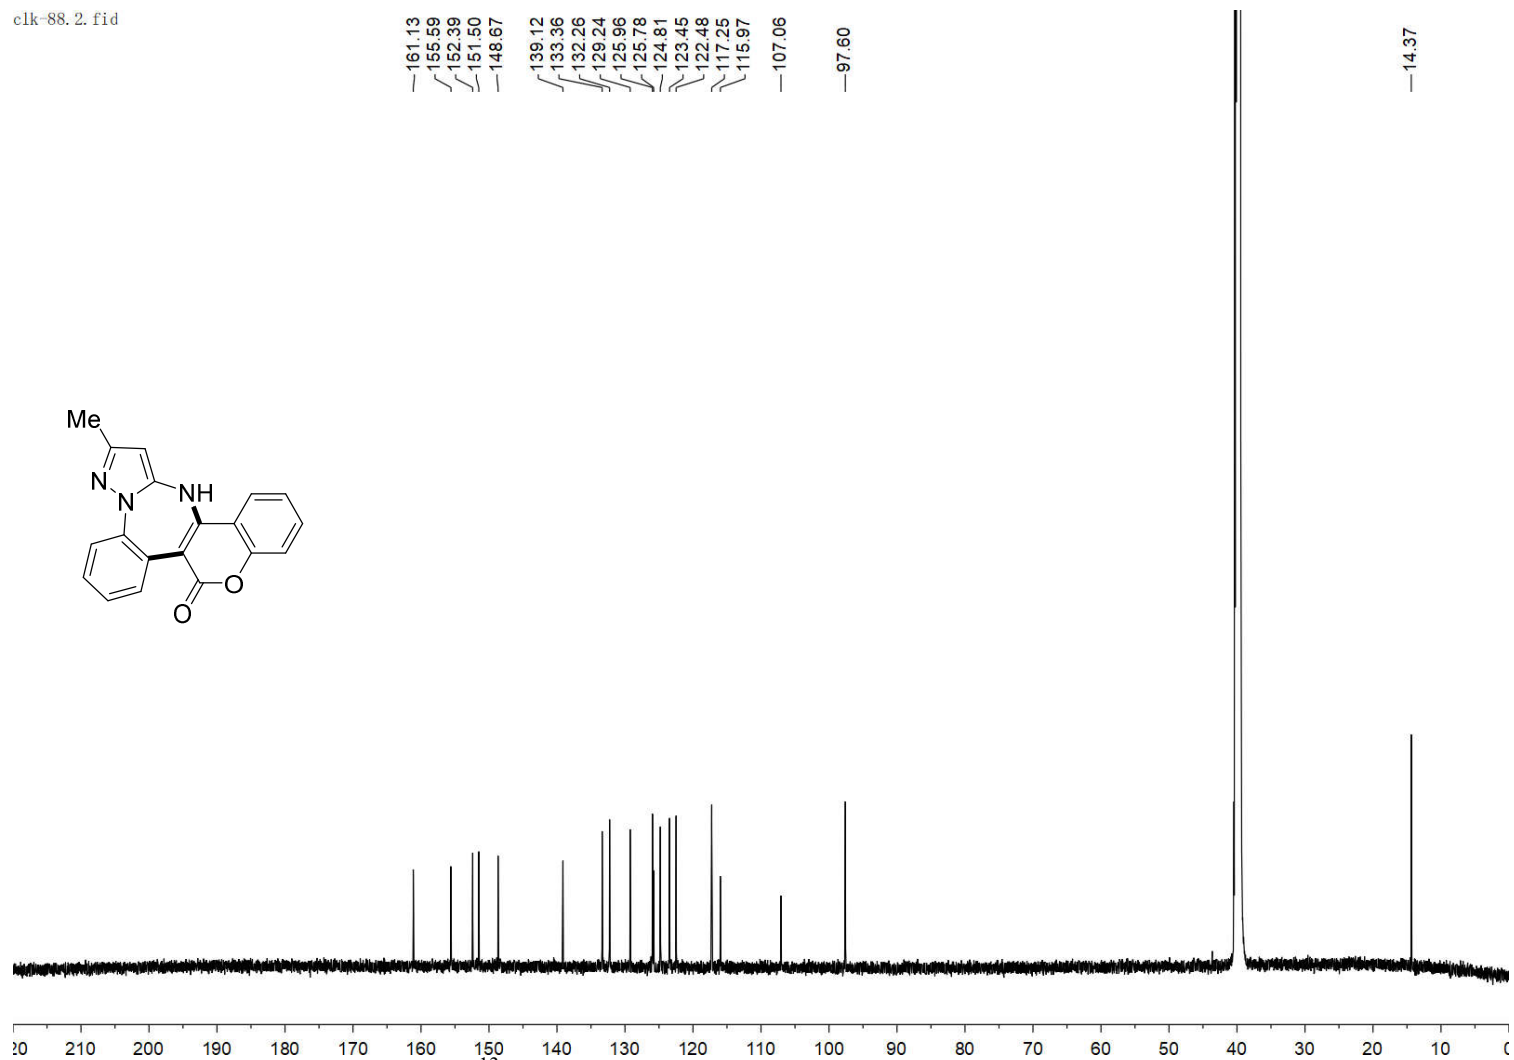

Figure S51.  $^{13}\text{C}$  NMR (150 MHz,  $\text{DMSO-}d_6$ ) spectra of compound 3x

CLK-105.1.fid

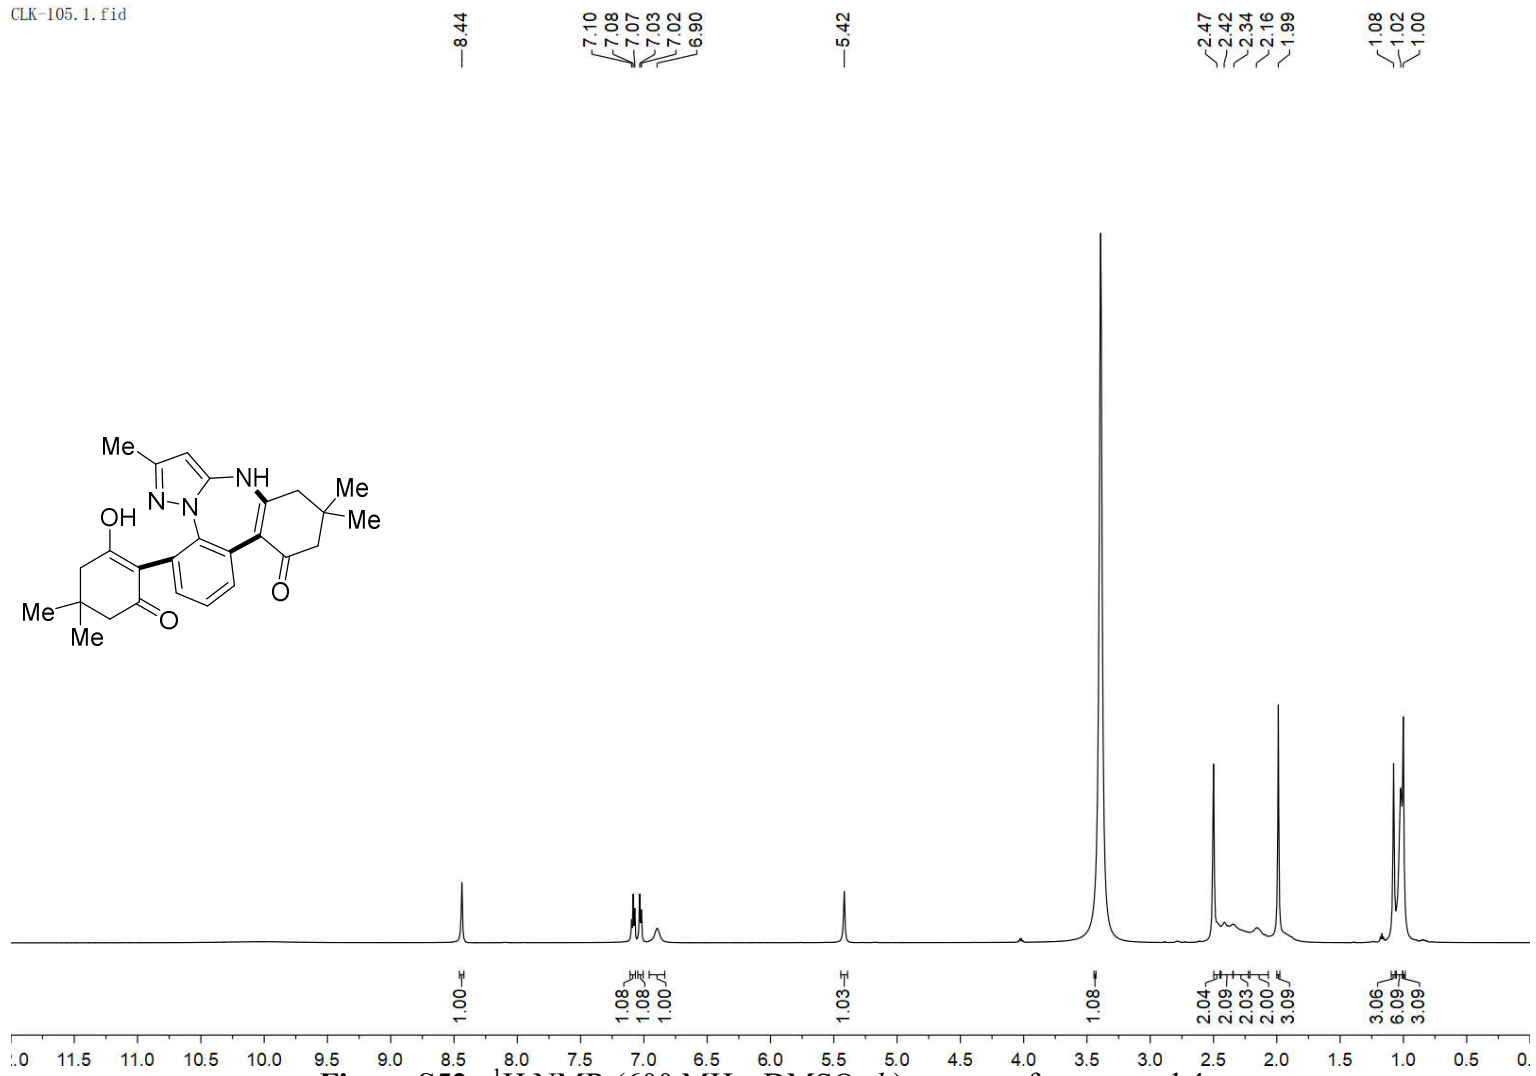

Figure S52. <sup>1</sup>H NMR (600 MHz, DMSO-*d*<sub>6</sub>) spectra of compound **4a**

CLK-105.3.fid

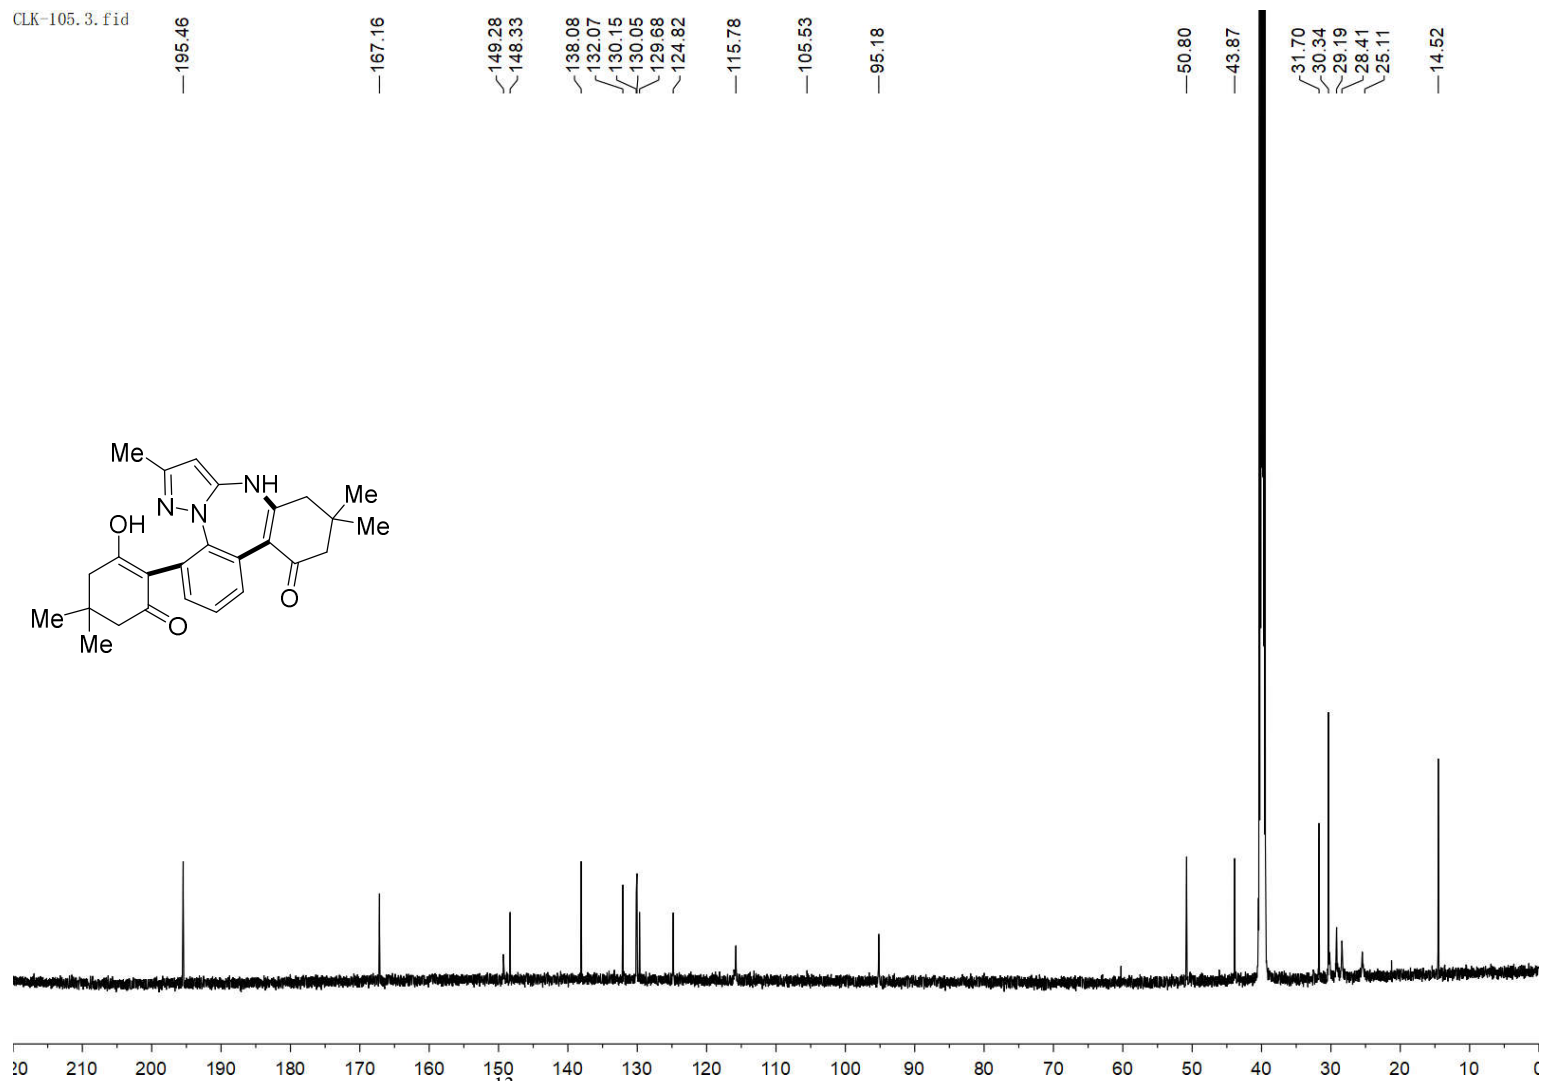

Figure S53. <sup>13</sup>C NMR (150 MHz, DMSO-*d*<sub>6</sub>) spectra of compound 4a



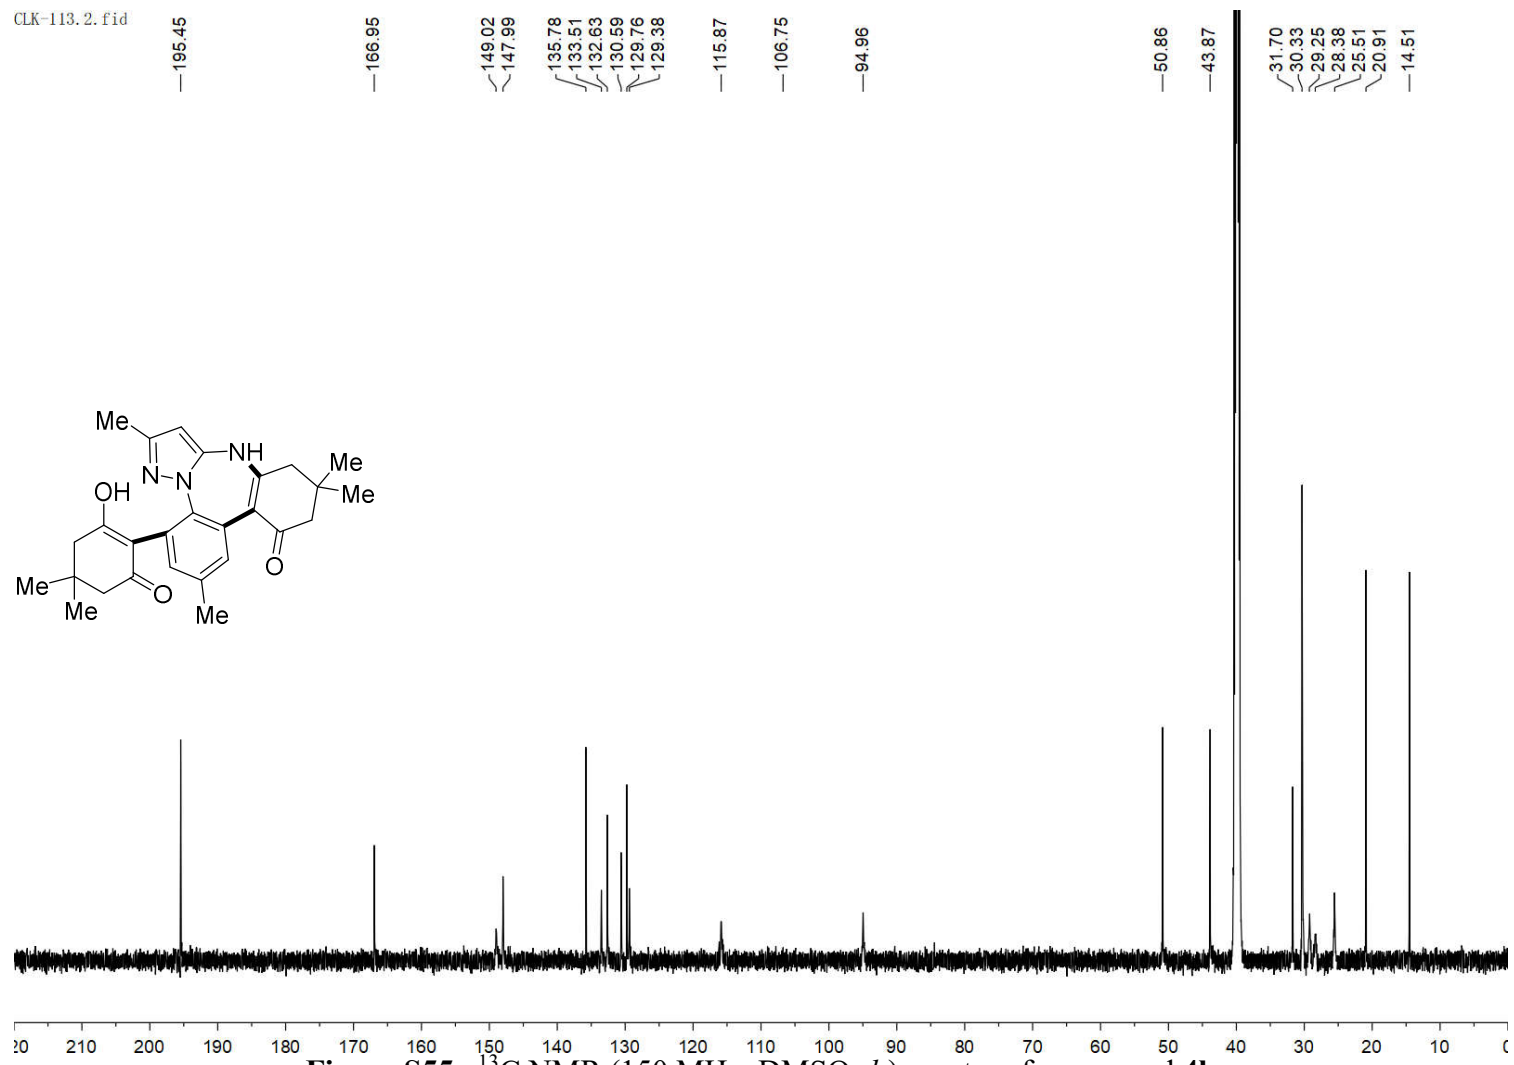



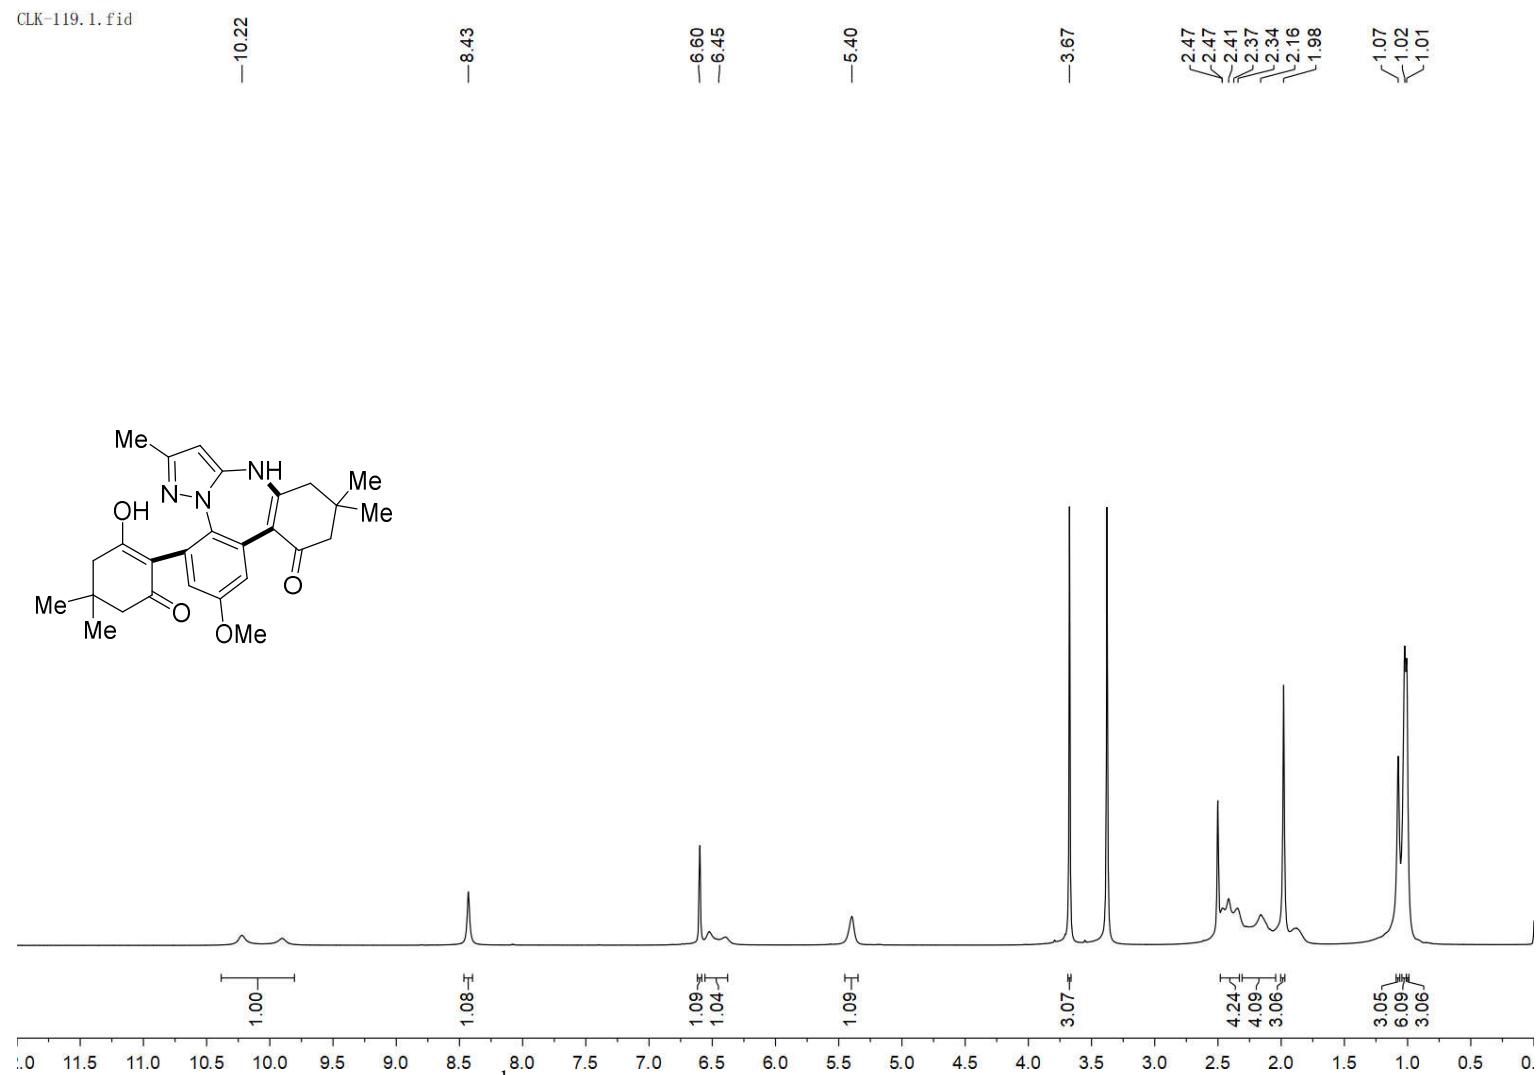

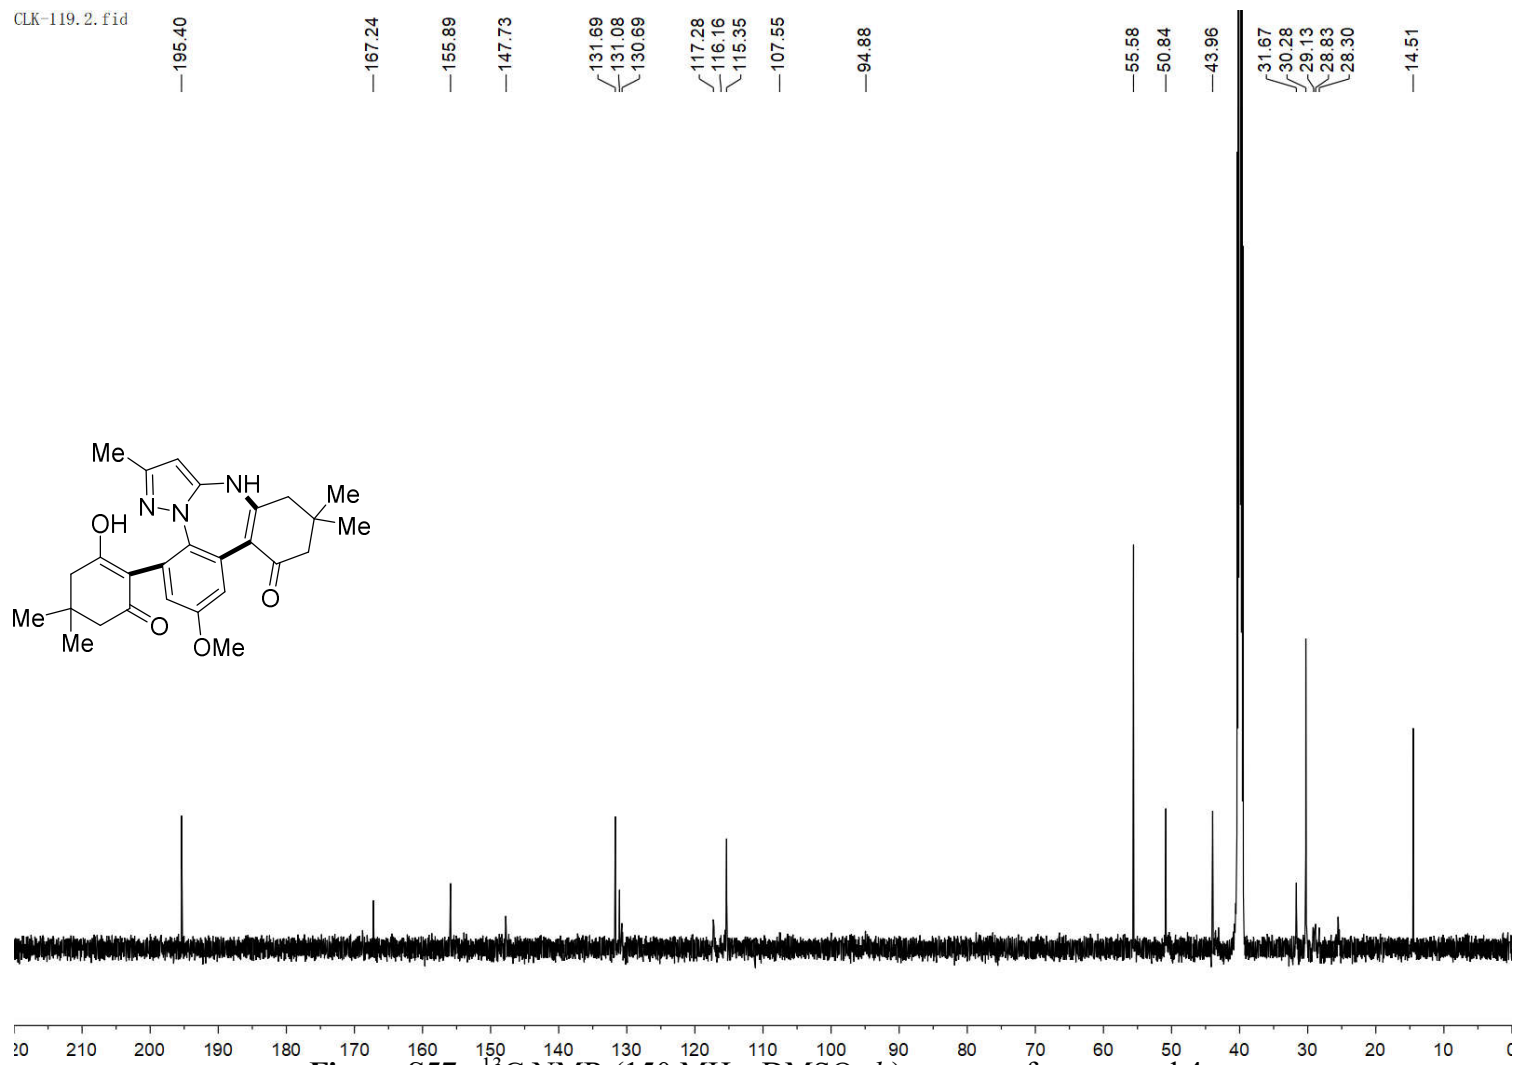

Figure S57. <sup>13</sup>C NMR (150 MHz, DMSO-*d*<sub>6</sub>) spectra of compound **4c**

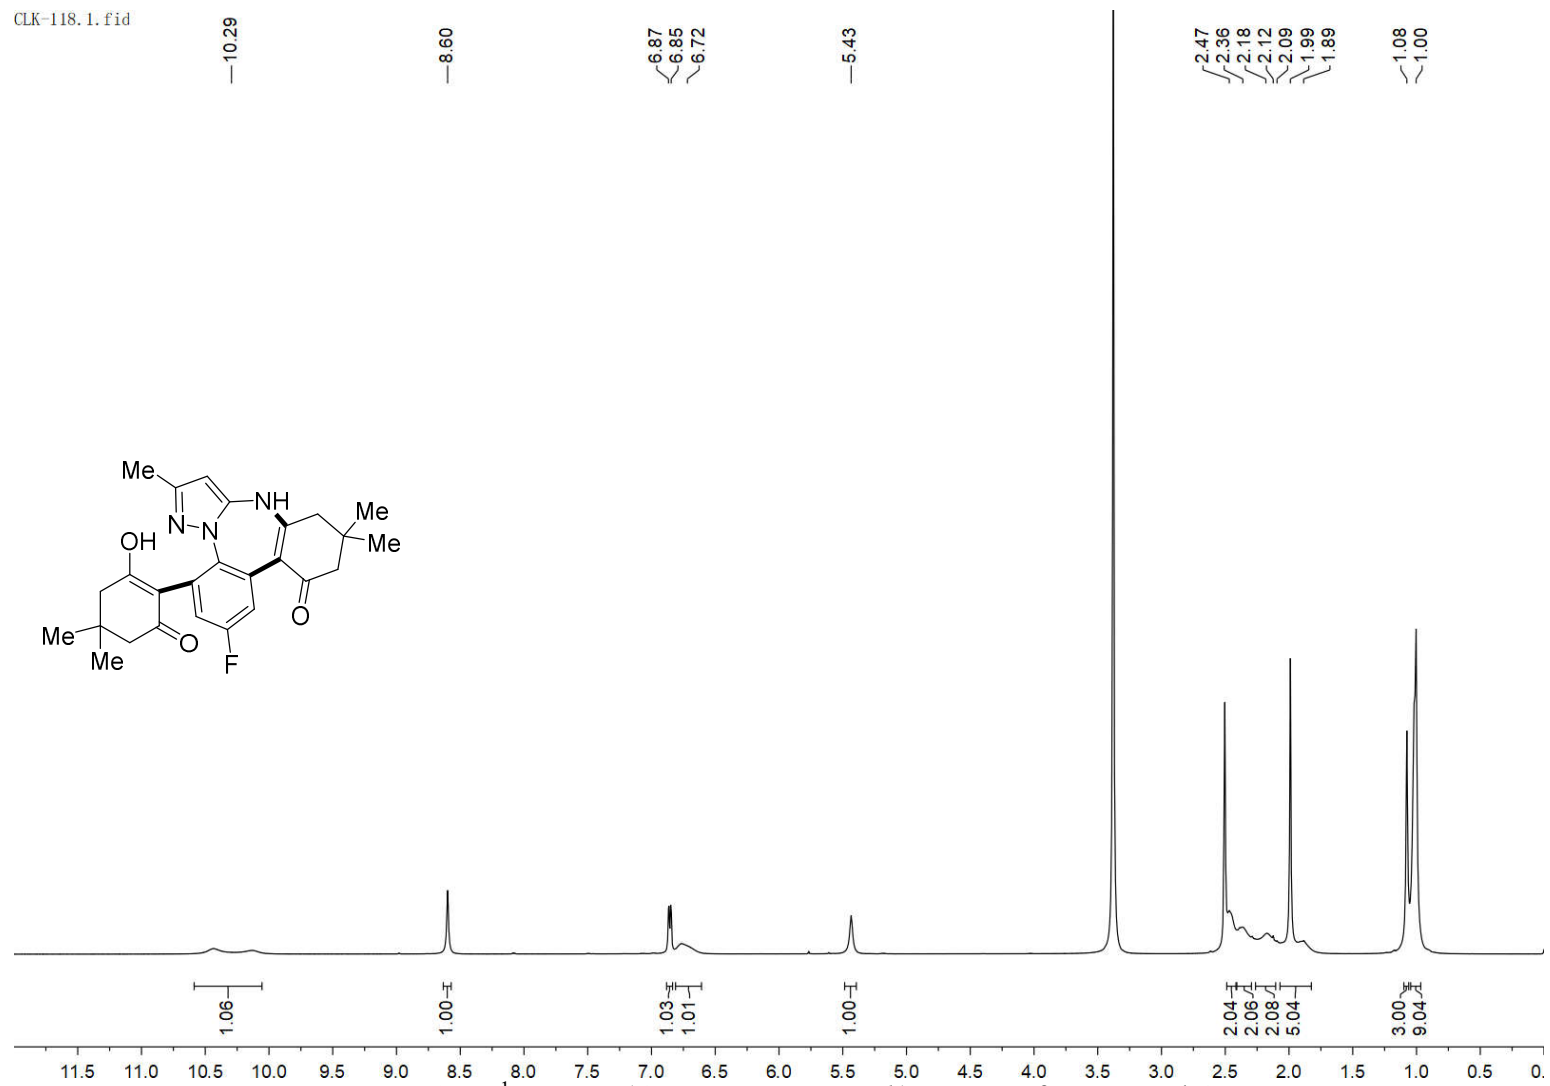

**Figure S58.**  $^1\text{H}$  NMR (600 MHz,  $\text{DMSO-}d_6$ ) spectra of compound **4d**

CLK-118.2.fid

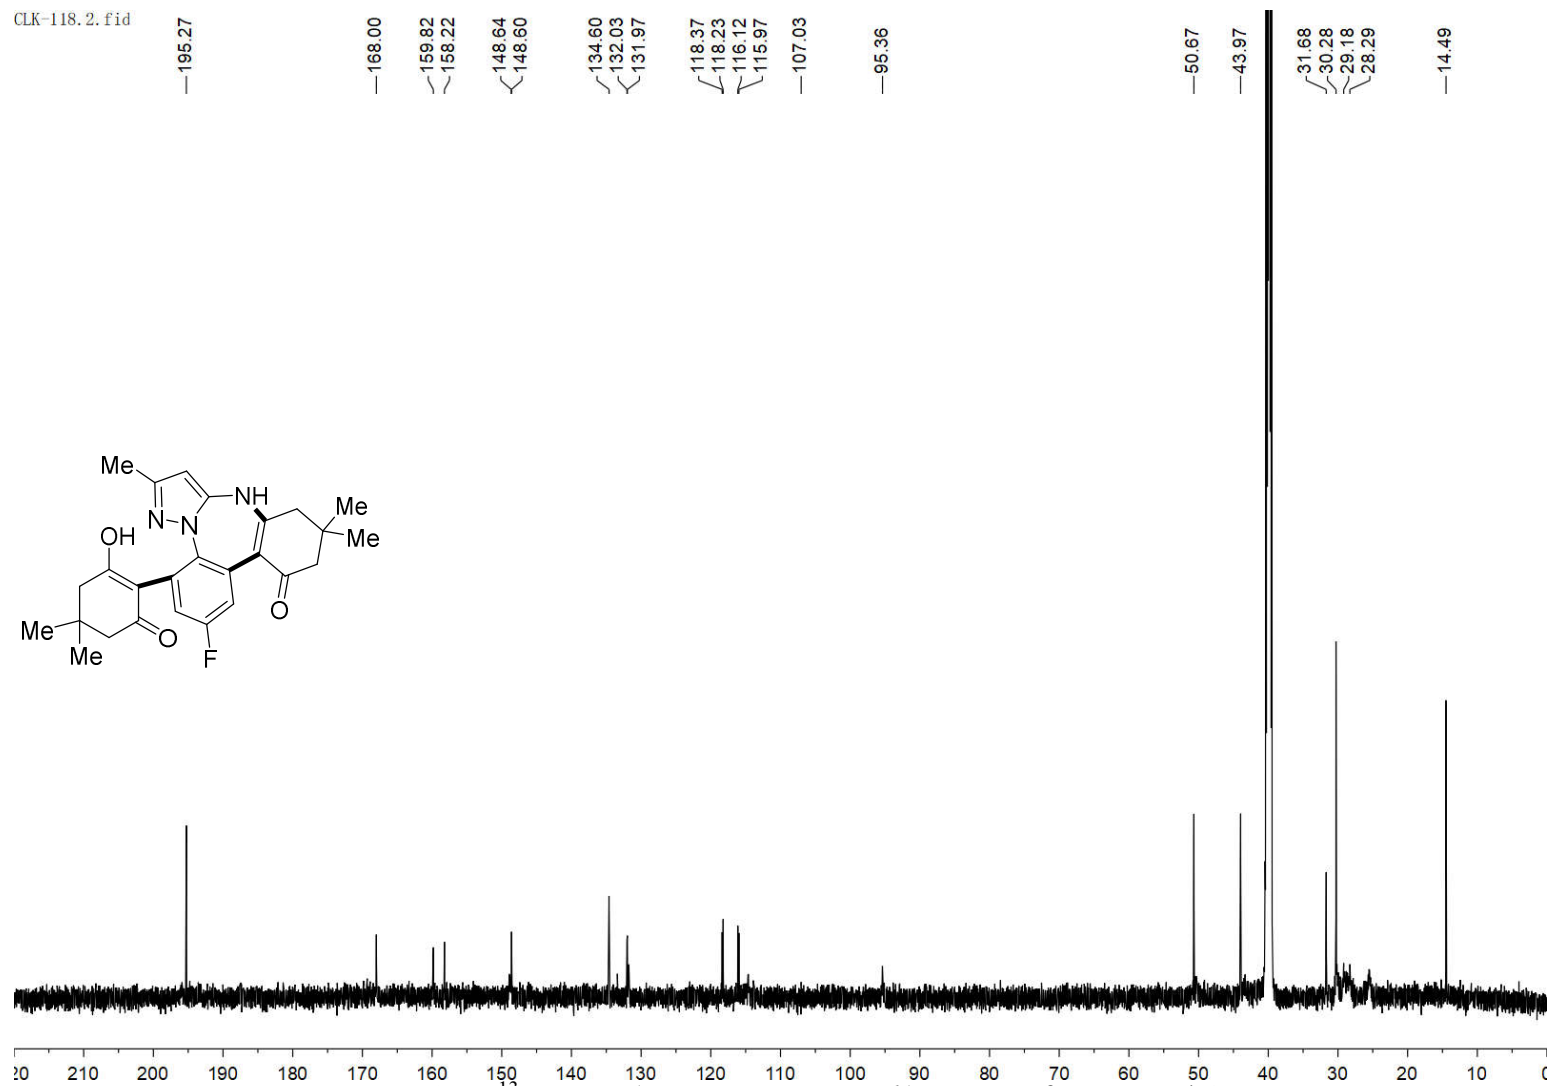

Figure S59.  $^{13}\text{C}$  NMR (150 MHz,  $\text{DMSO}-d_6$ ) spectra of compound 4d

CLK-116-1.1.fid

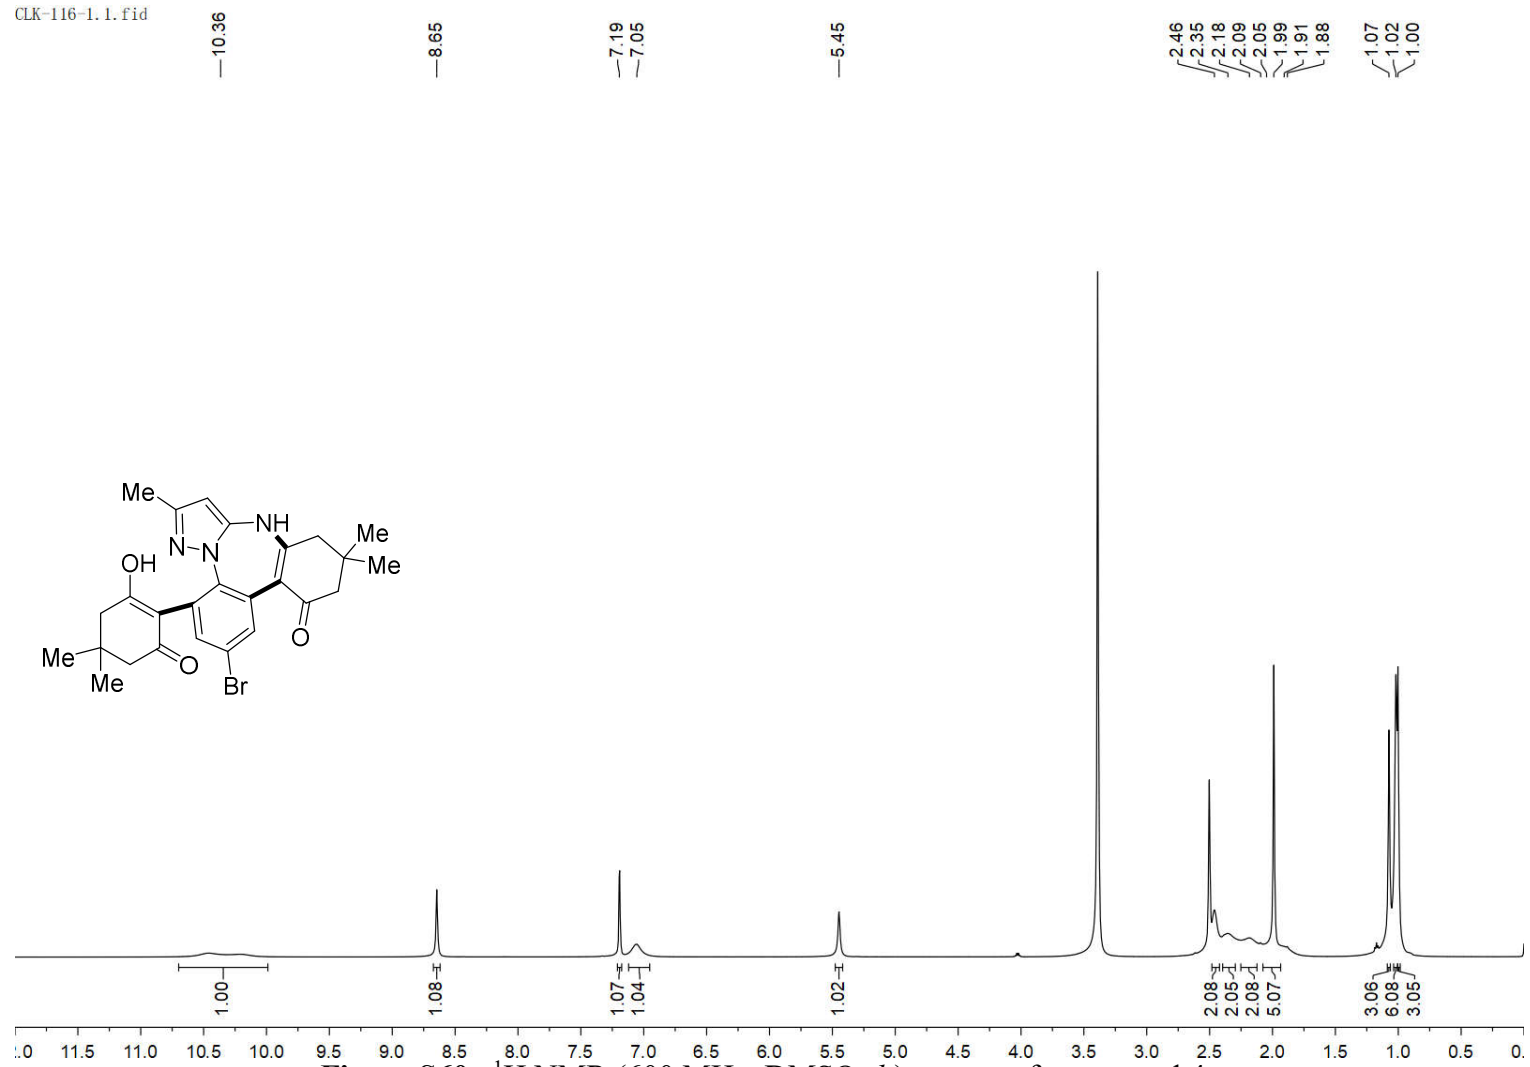

Figure S60.  $^1\text{H}$  NMR (600 MHz,  $\text{DMSO-}d_6$ ) spectra of compound 4e

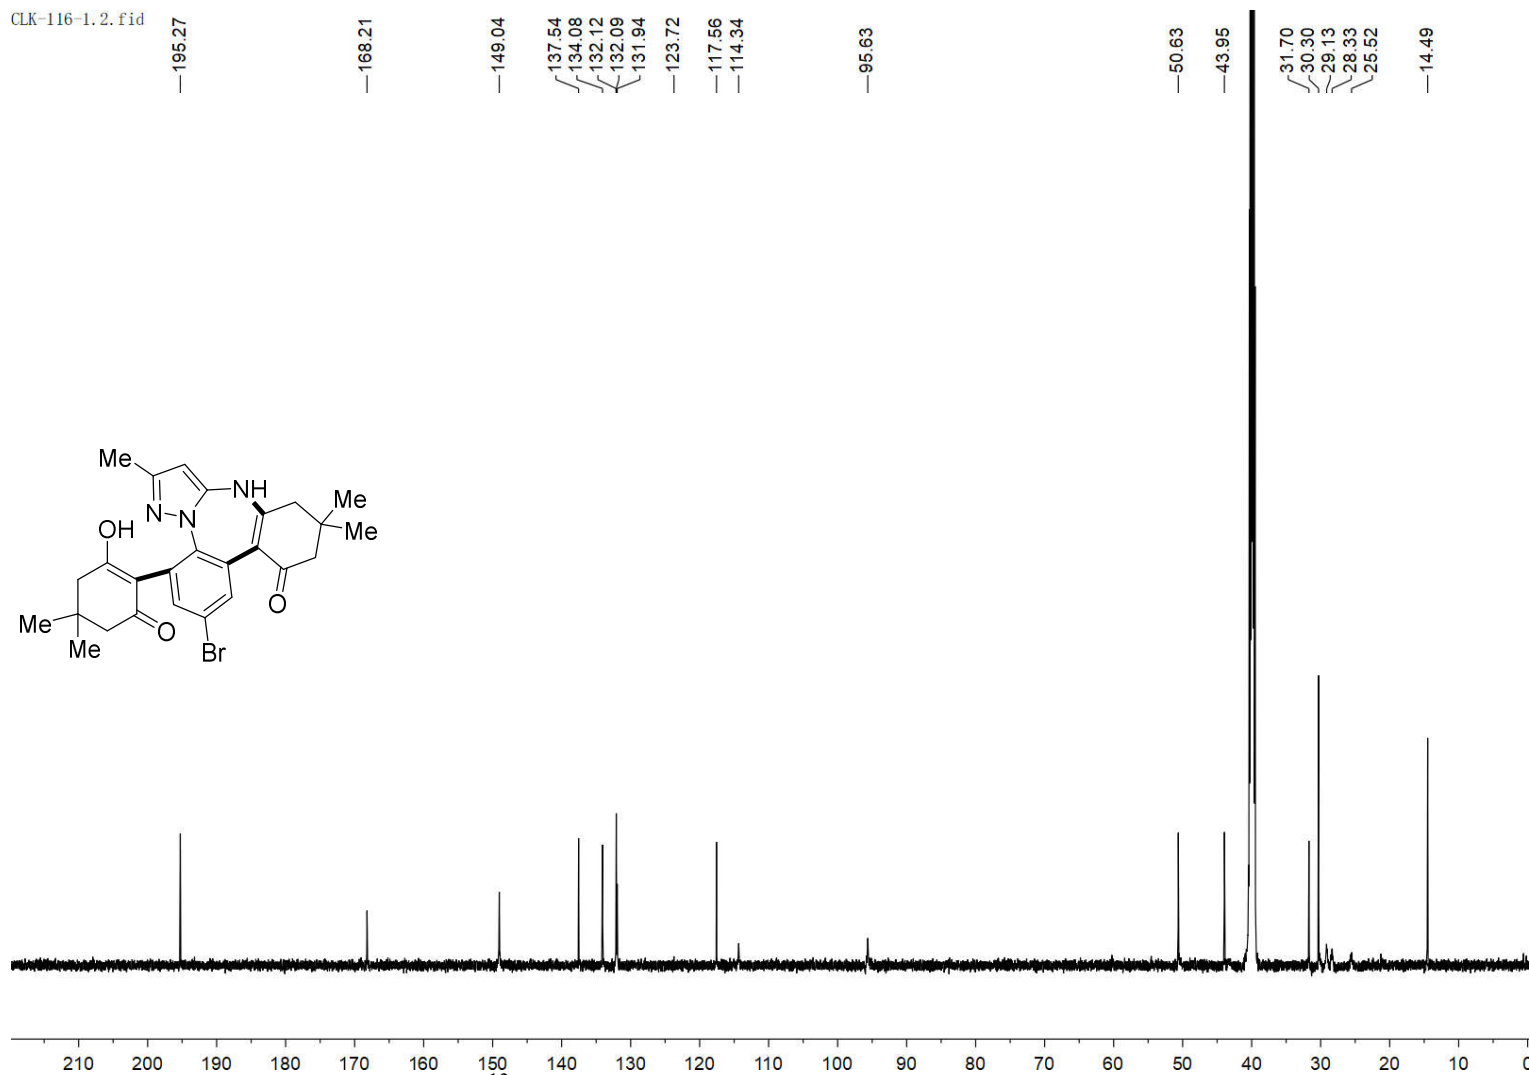

Figure S61.  $^{13}\text{C}$  NMR (150 MHz,  $\text{DMSO-}d_6$ ) spectra of compound **4e**



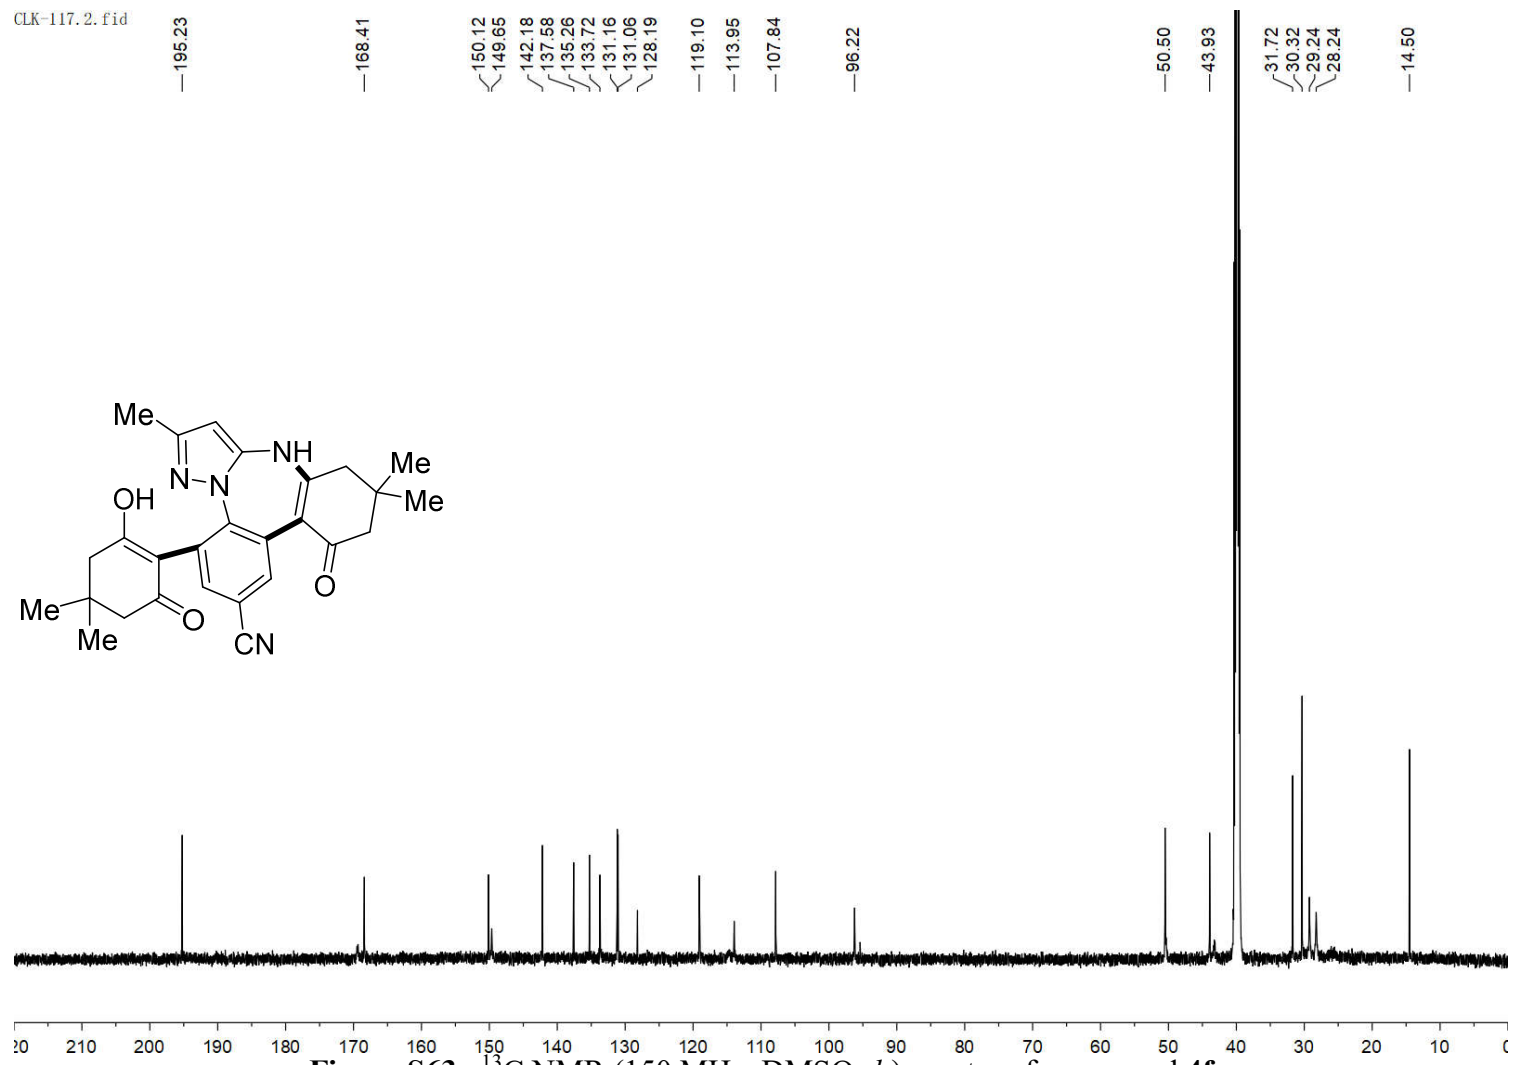



CLK-120.1.fid

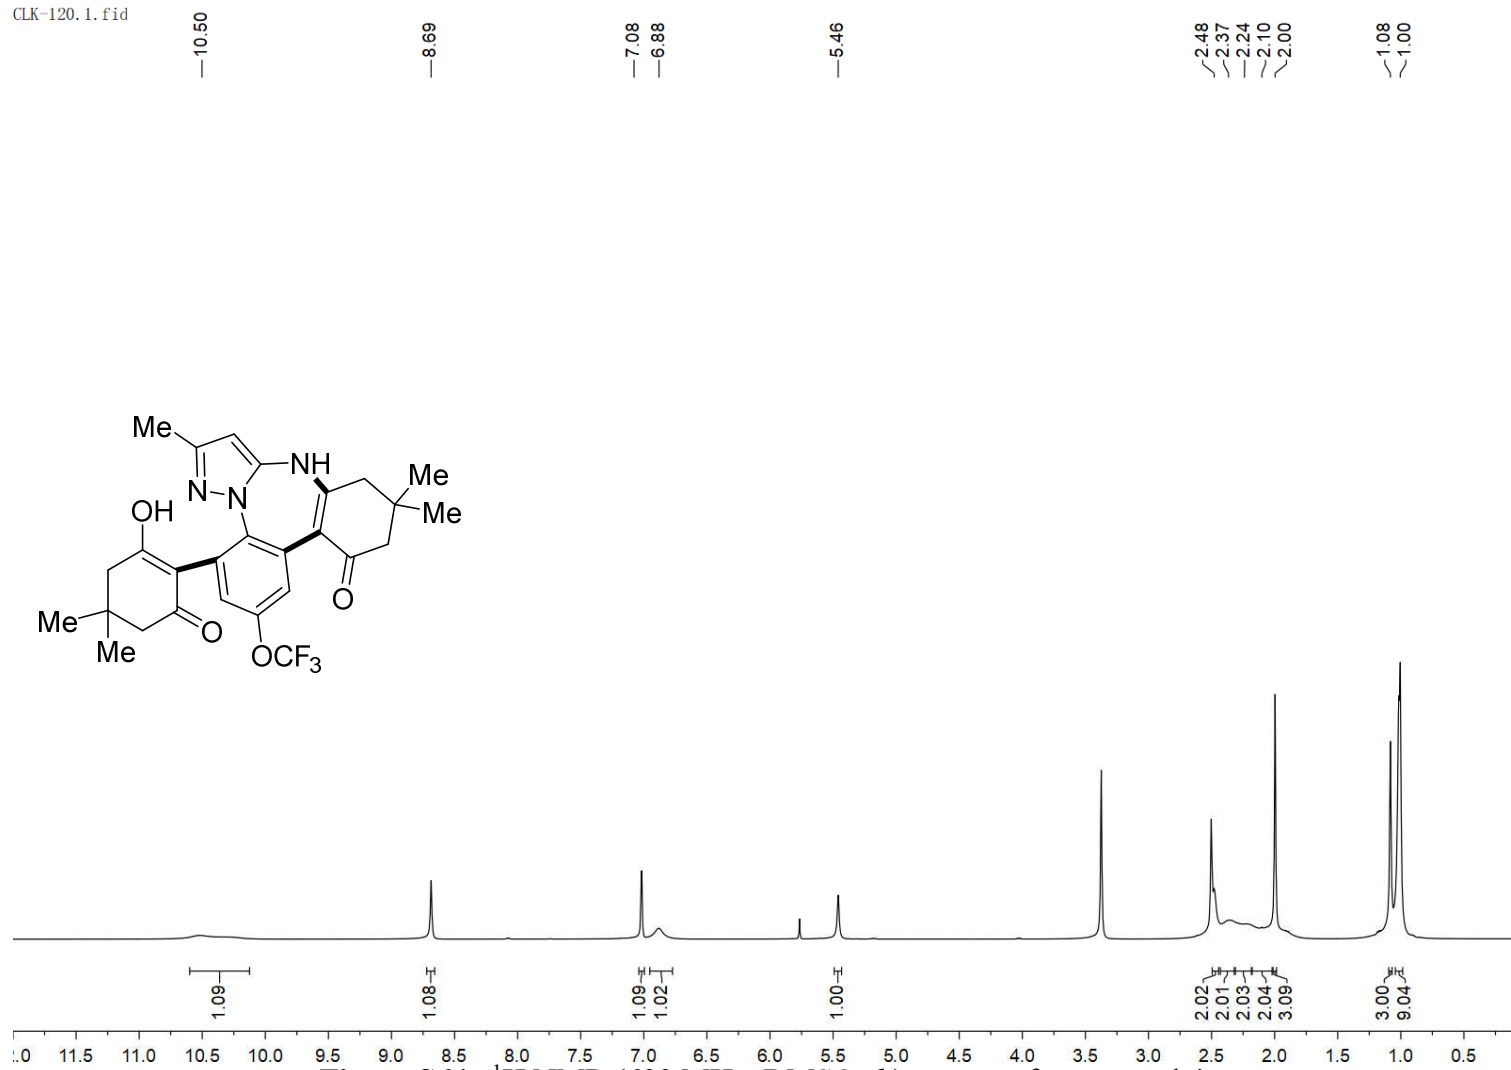

Figure S64. <sup>1</sup>H NMR (600 MHz, DMSO-*d*<sub>6</sub>) spectra of compound 4g

CLK-120.2.fid

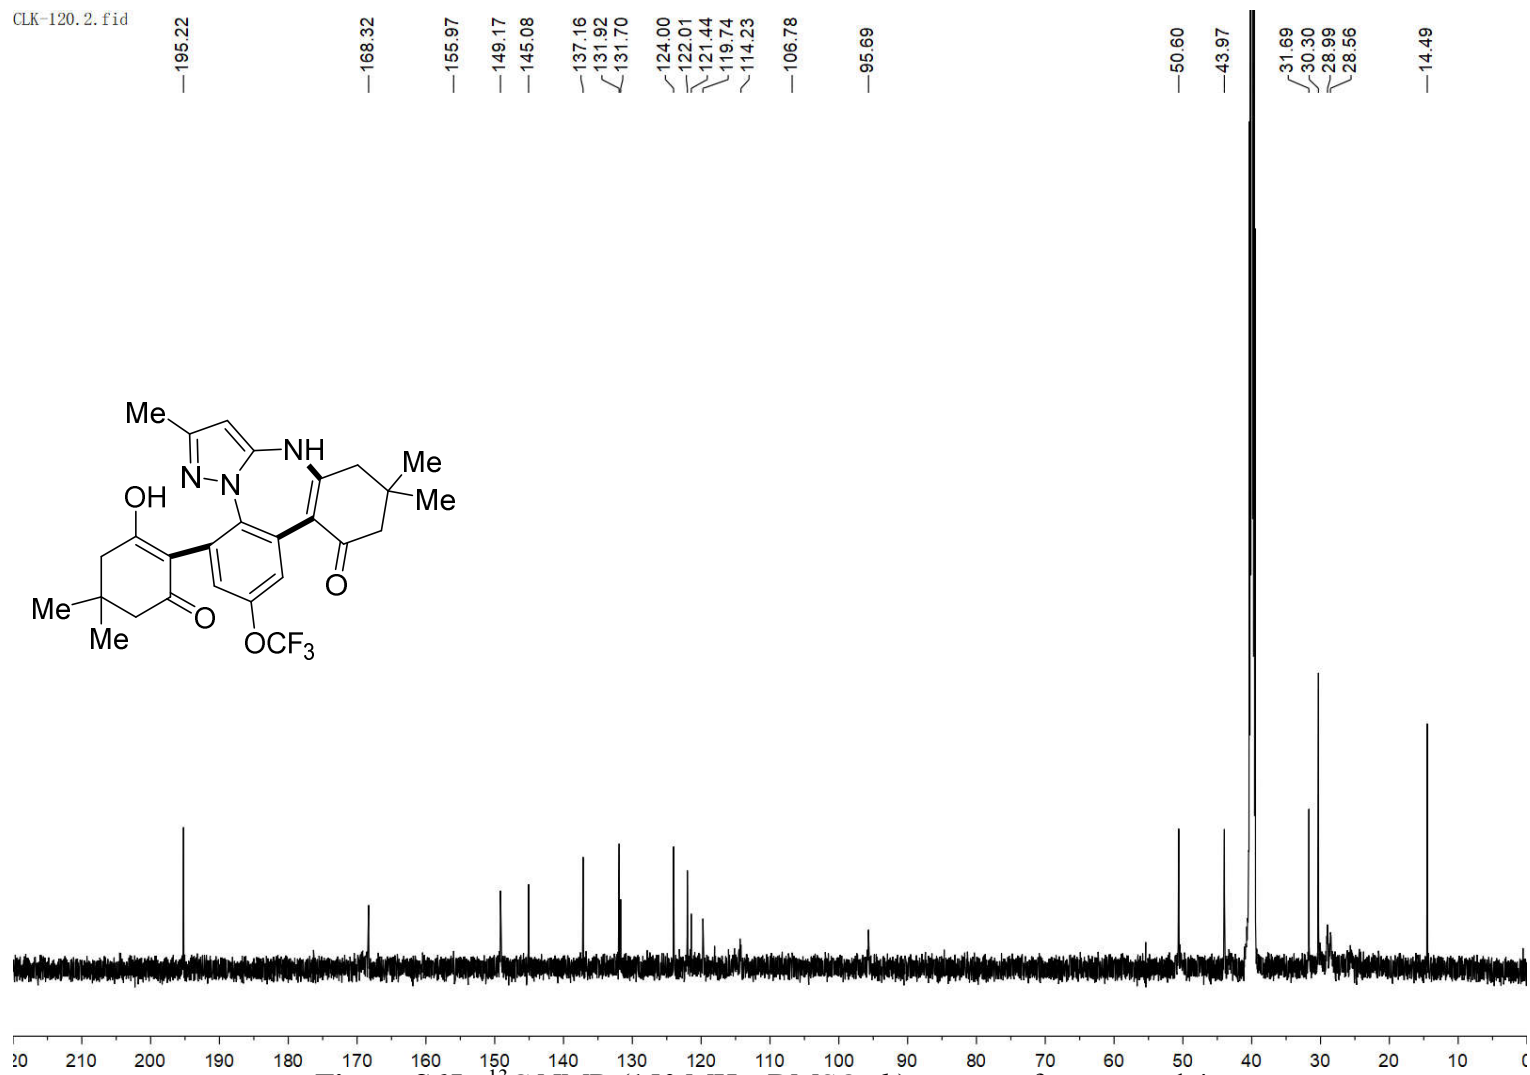

Figure S65. <sup>13</sup>C NMR (150 MHz, DMSO-*d*<sub>6</sub>) spectra of compound 4g

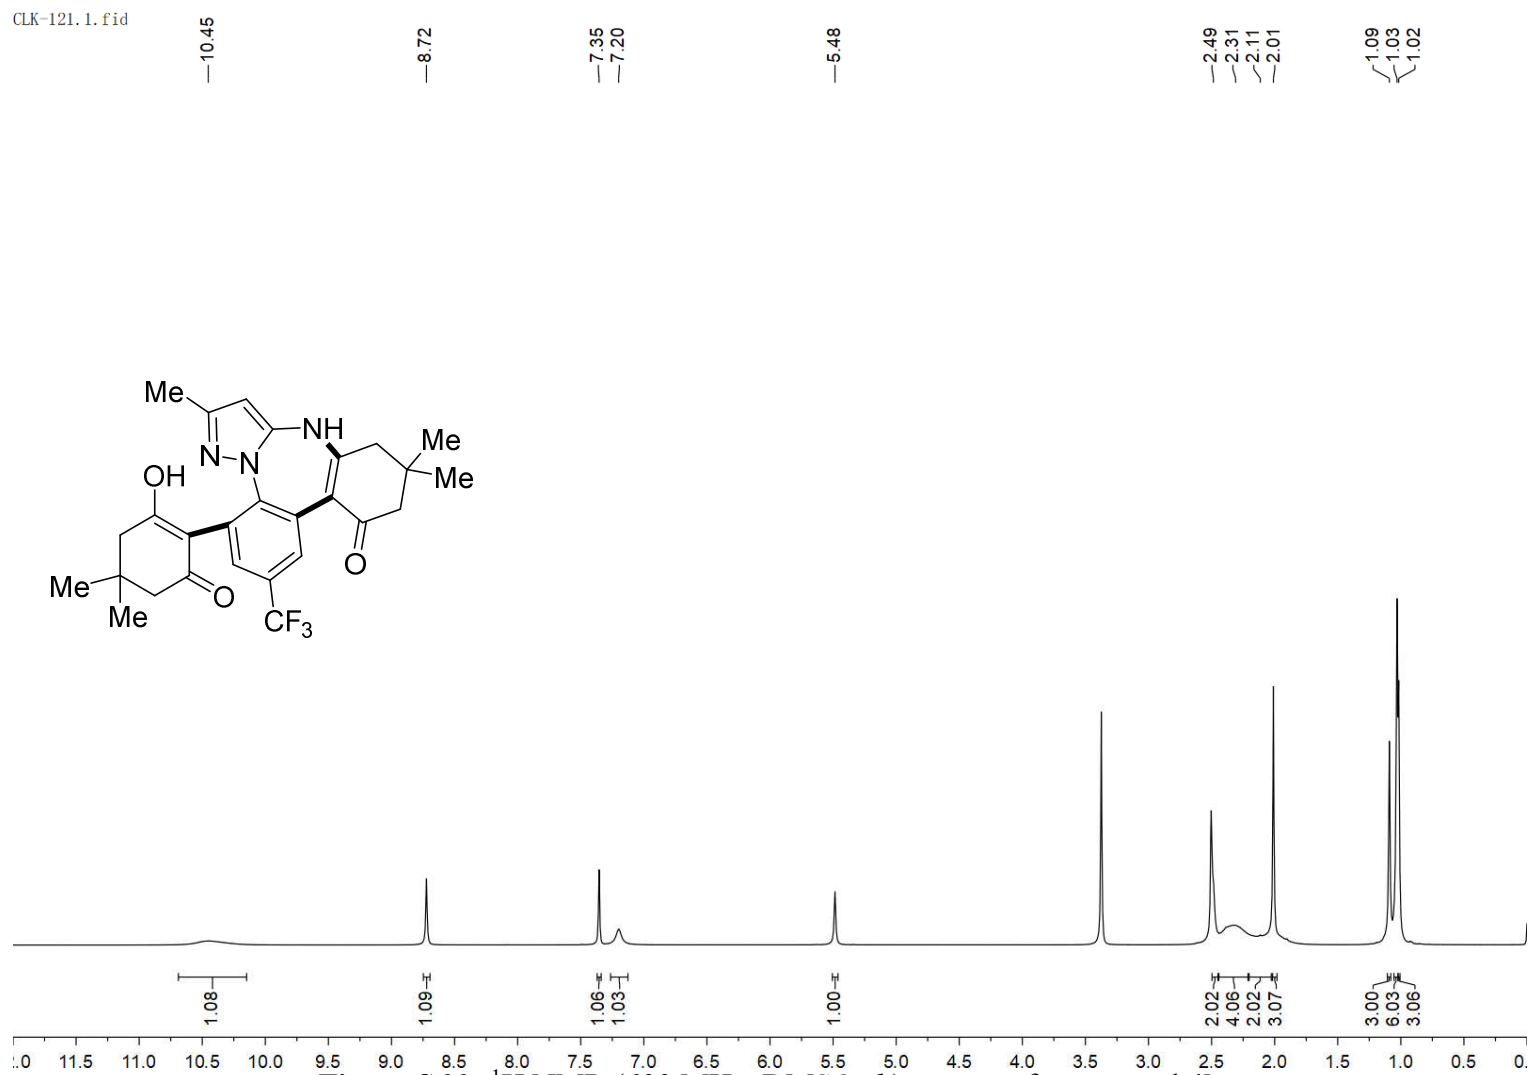

CLK-121.2.fid

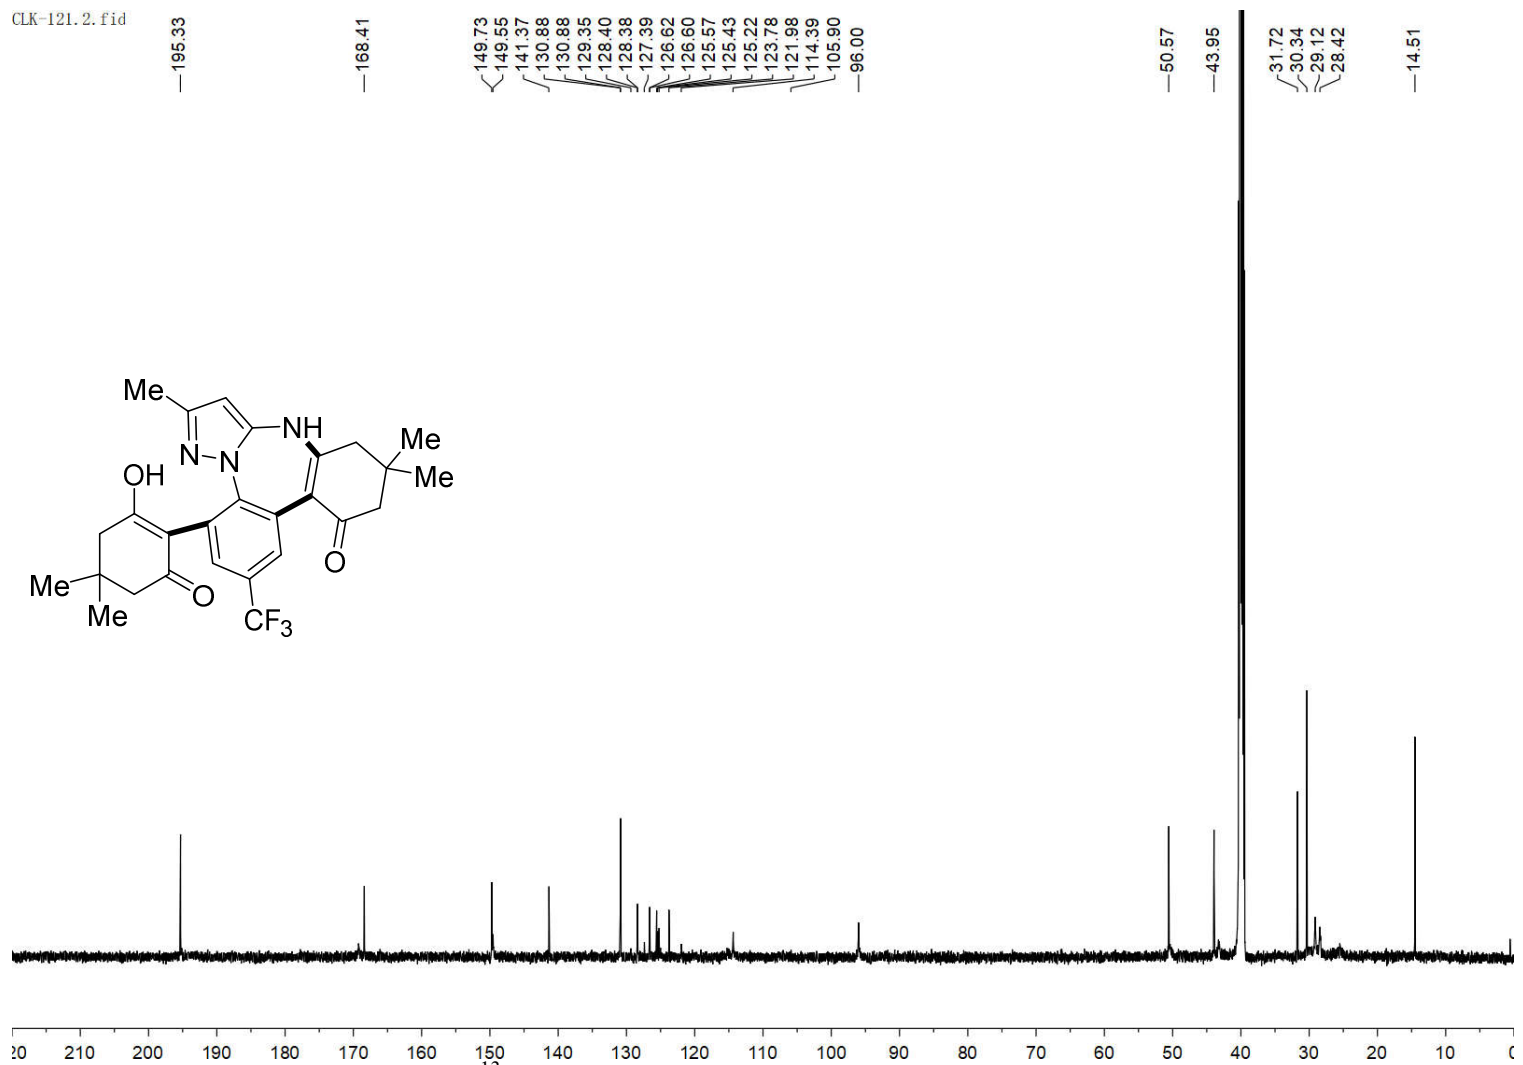

Figure S67. <sup>13</sup>C NMR (150 MHz, DMSO-*d*<sub>6</sub>) spectra of compound 4h

clk-84.3.fid

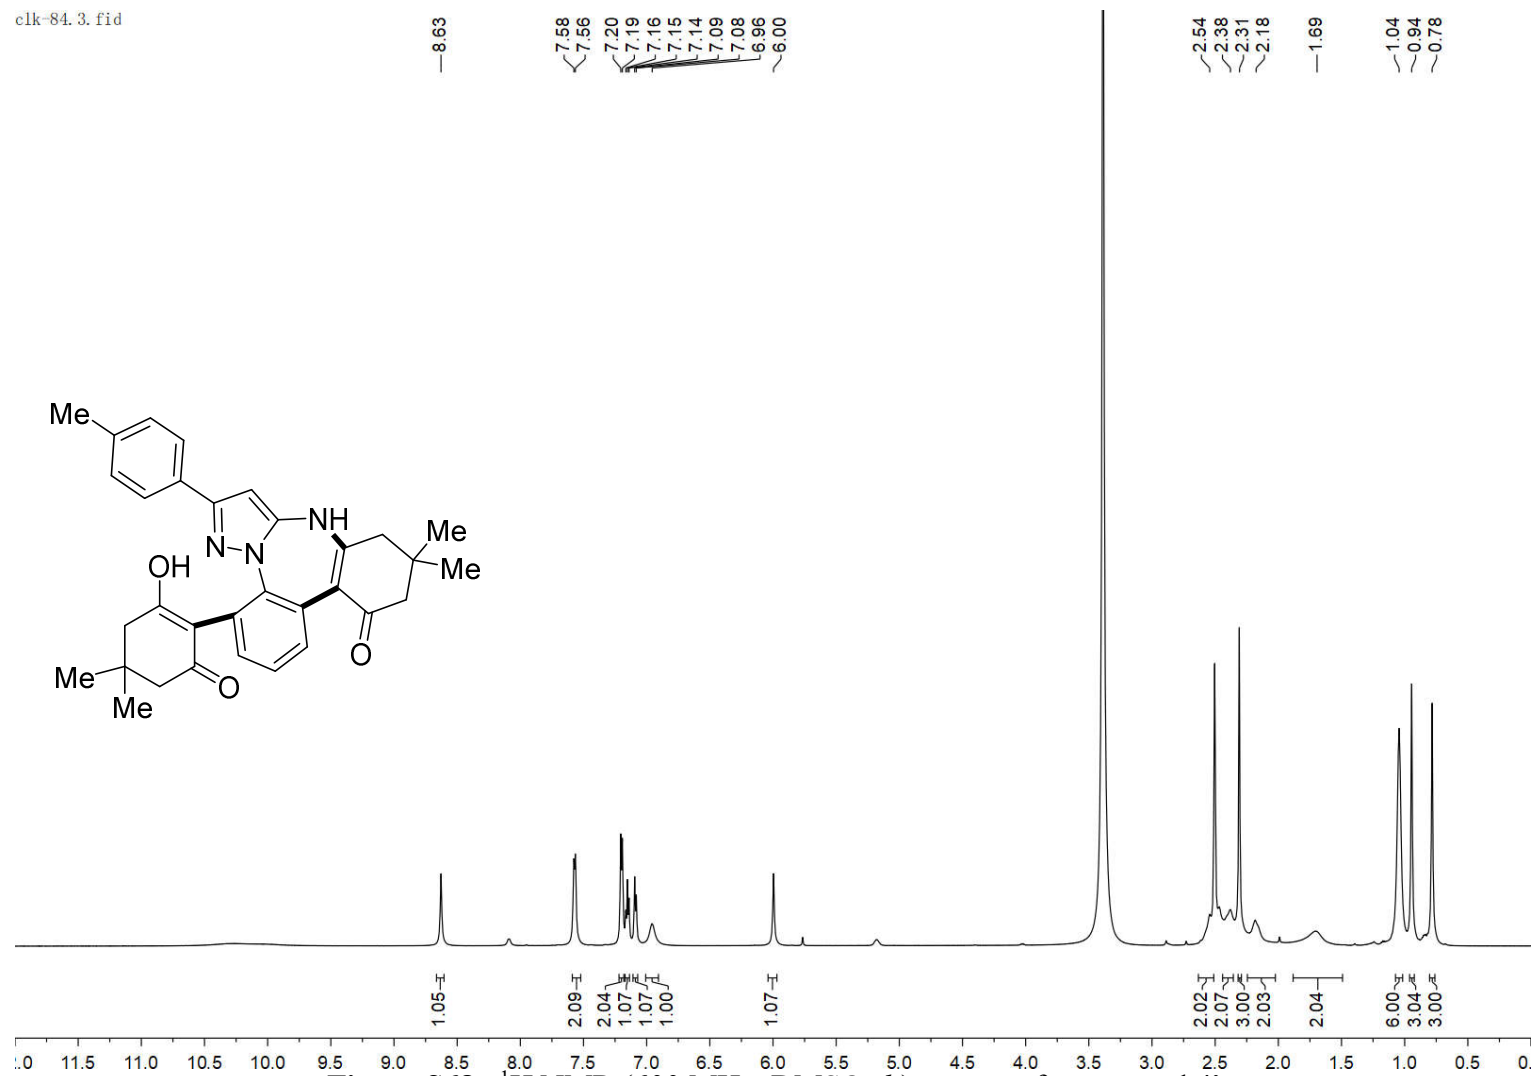

Figure S68.  $^1\text{H}$  NMR (600 MHz,  $\text{DMSO-}d_6$ ) spectra of compound **4i**

CLK-106.2.fid

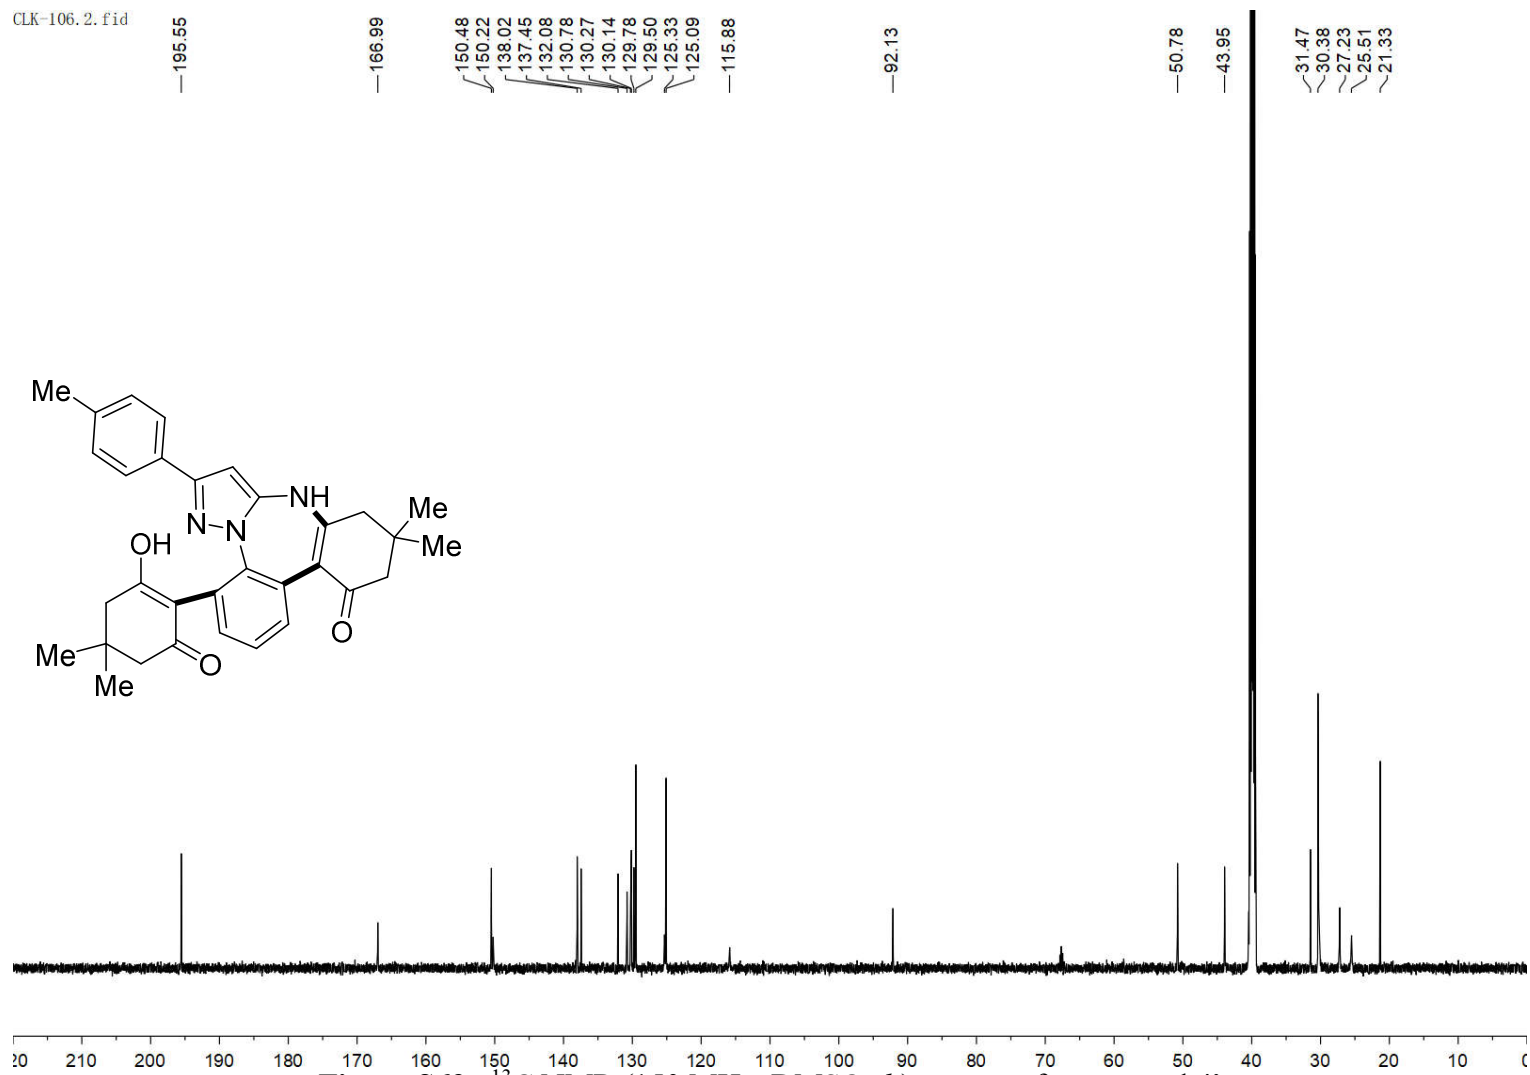

Figure S69.  $^{13}\text{C}$  NMR (150 MHz,  $\text{DMSO-}d_6$ ) spectra of compound **4i**

clk-87.1.fid

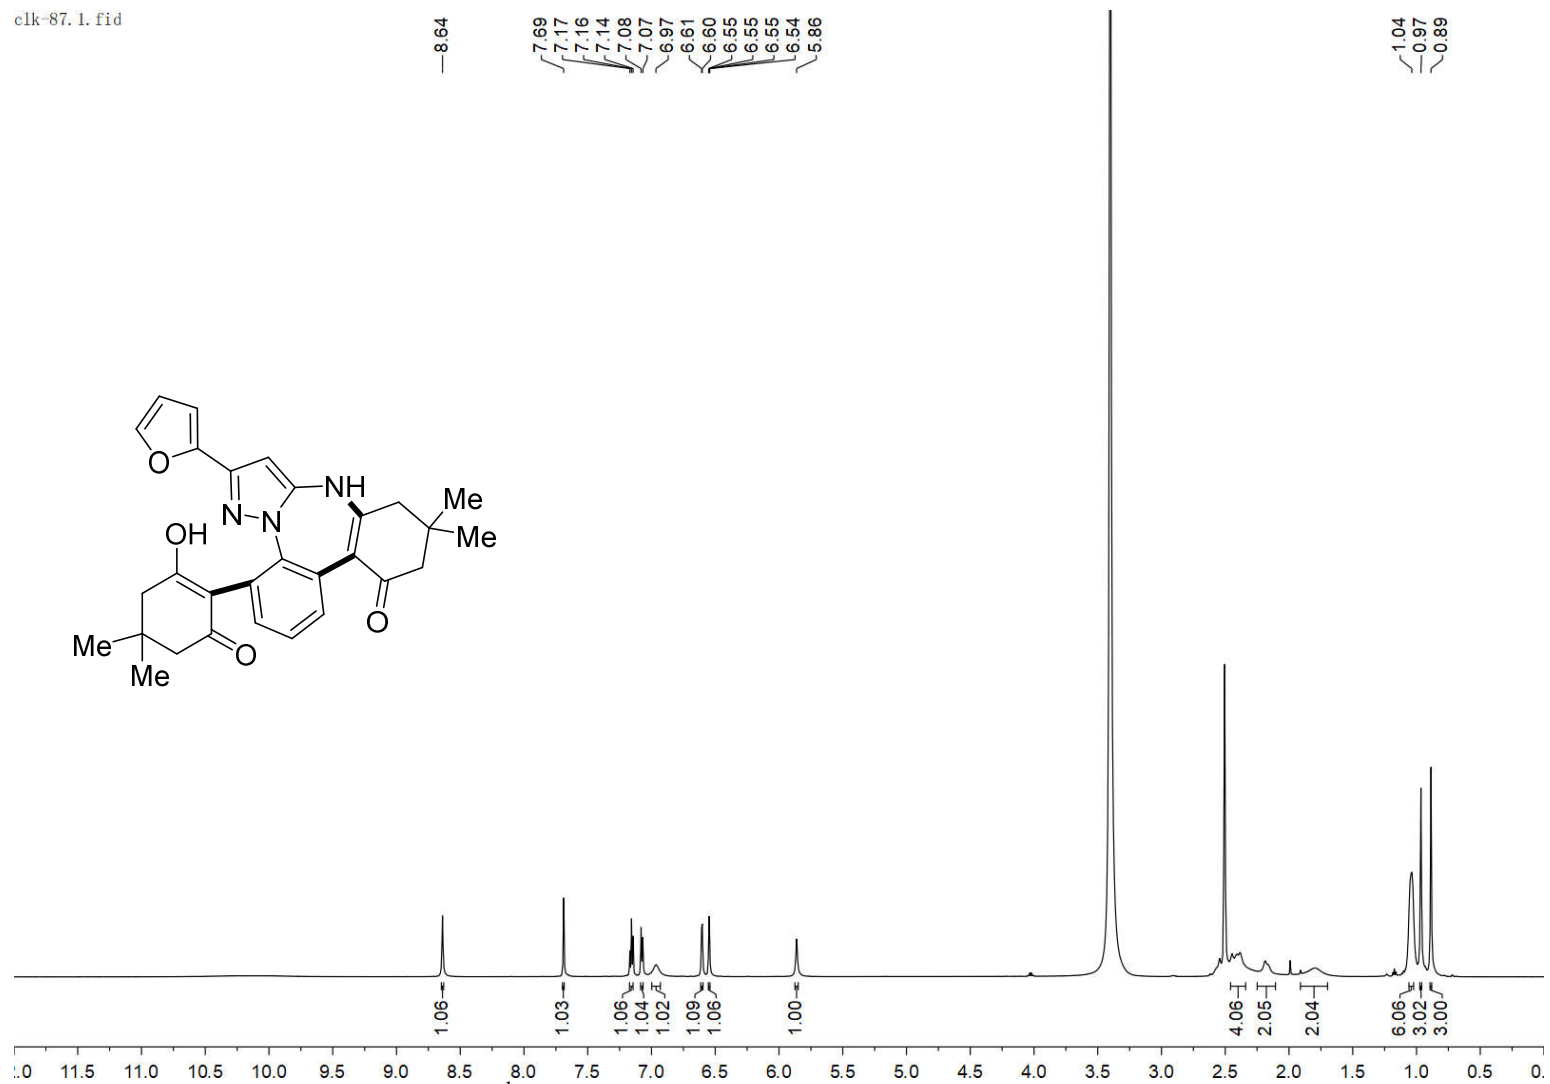

Figure S70. <sup>1</sup>H NMR (600 MHz, DMSO-*d*<sub>6</sub>) spectra of compound **4j**

clk-87.2.fid

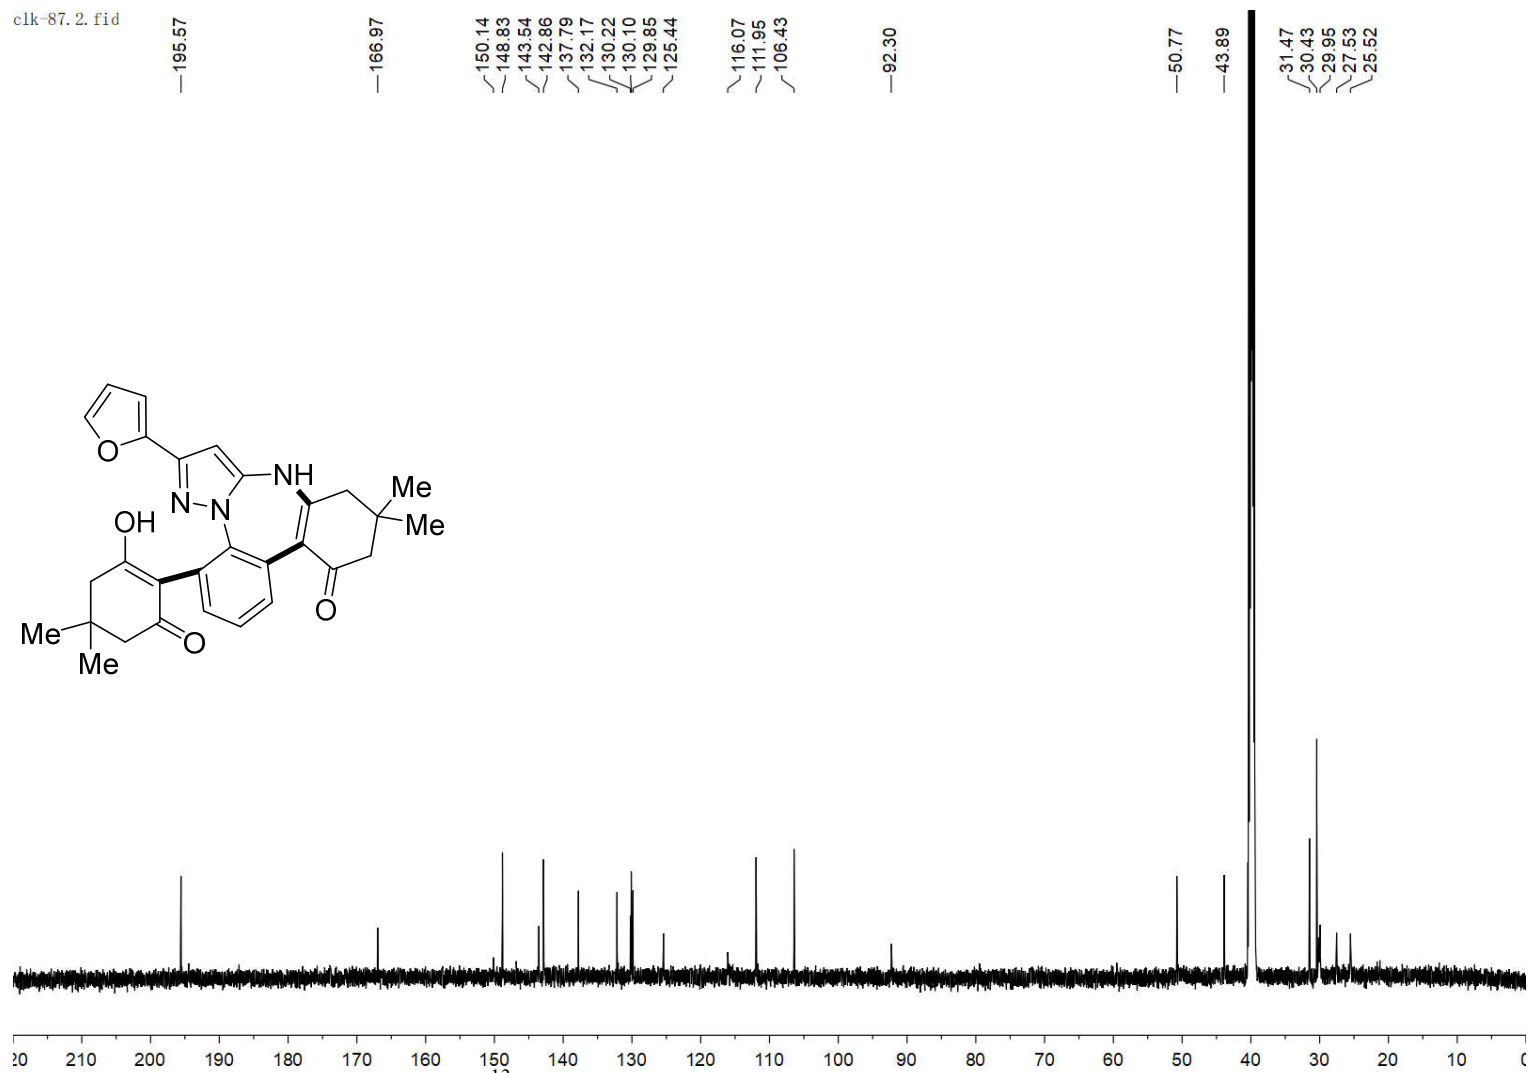

Figure S71. <sup>13</sup>C NMR (150 MHz, DMSO-*d*<sub>6</sub>) spectra of compound 4j



clk-82.1.fid

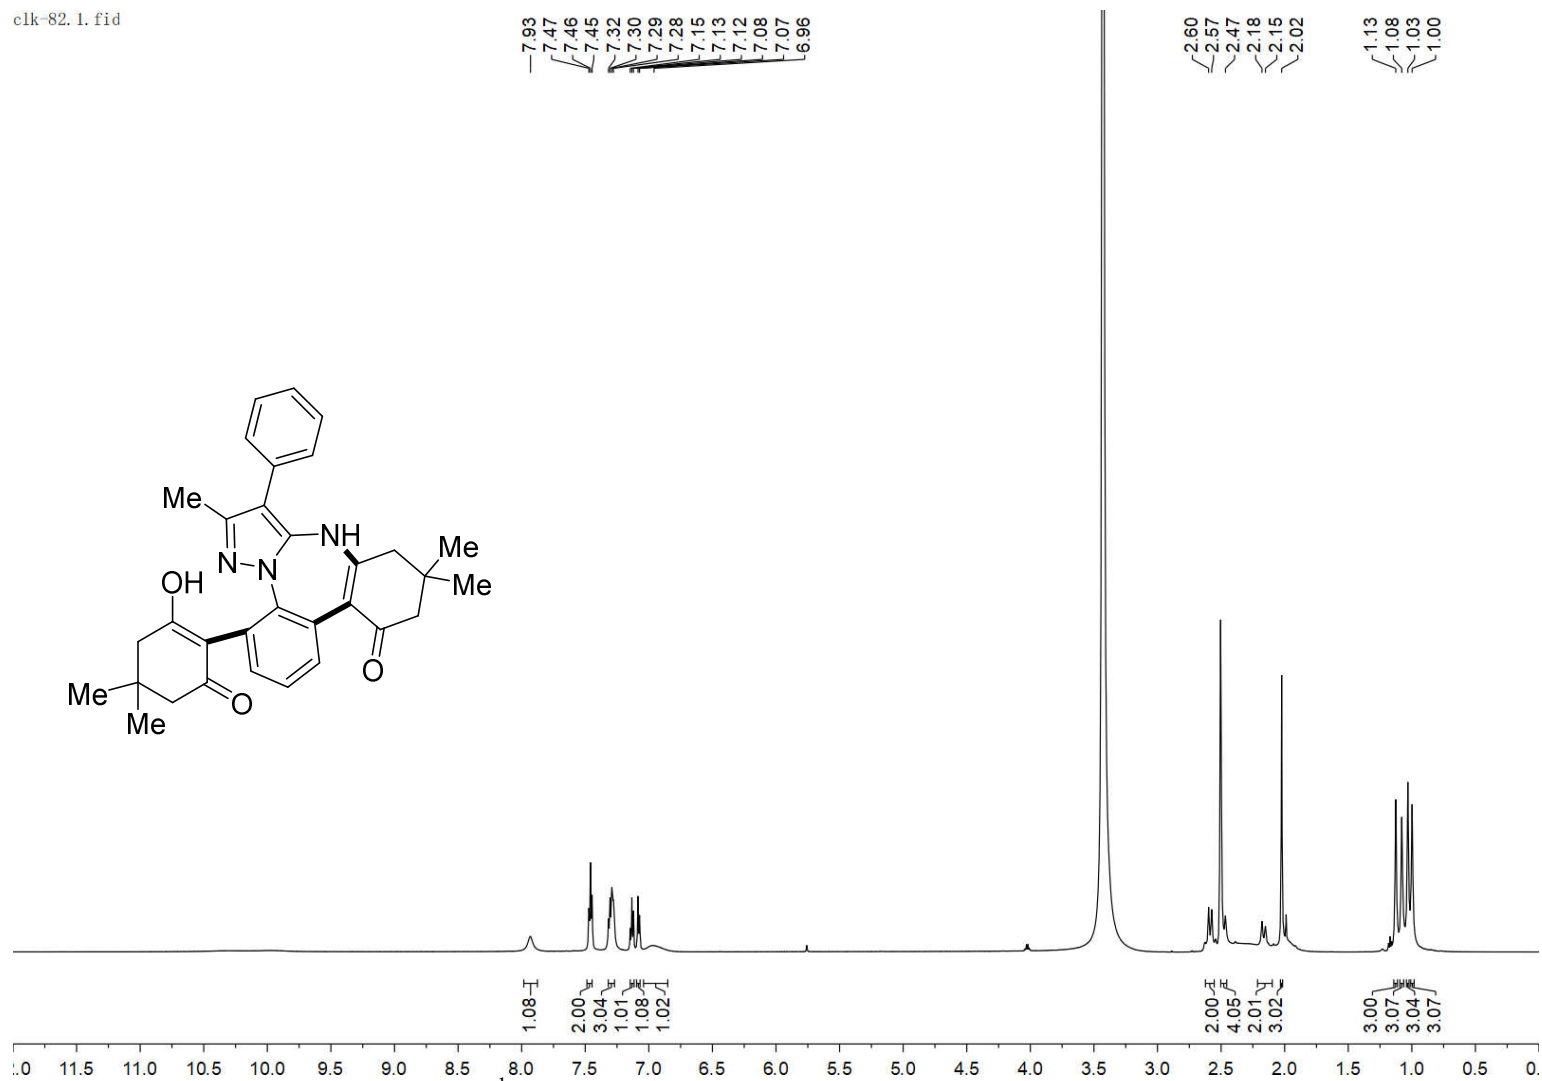

Figure S72. <sup>1</sup>H NMR (600 MHz, DMSO-*d*<sub>6</sub>) spectra of compound 4k

clk-108.2.fid

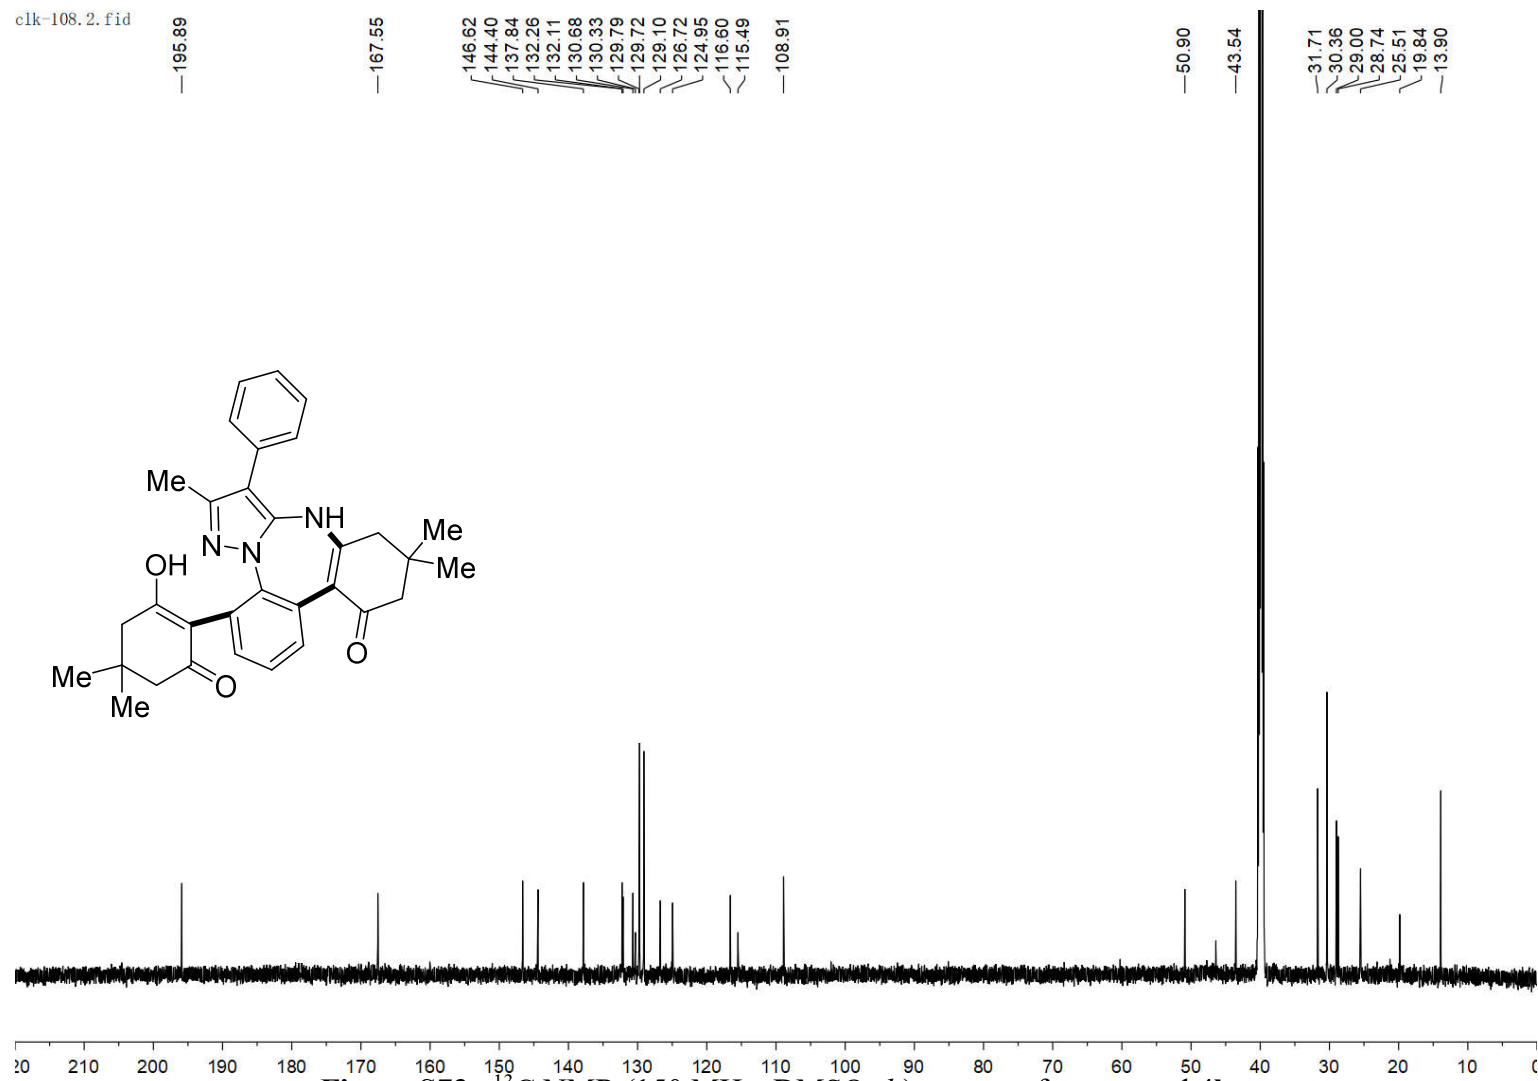

Figure S73. <sup>13</sup>C NMR (150 MHz, DMSO-*d*<sub>6</sub>) spectra of compound 4k

CLK-122.1.fid

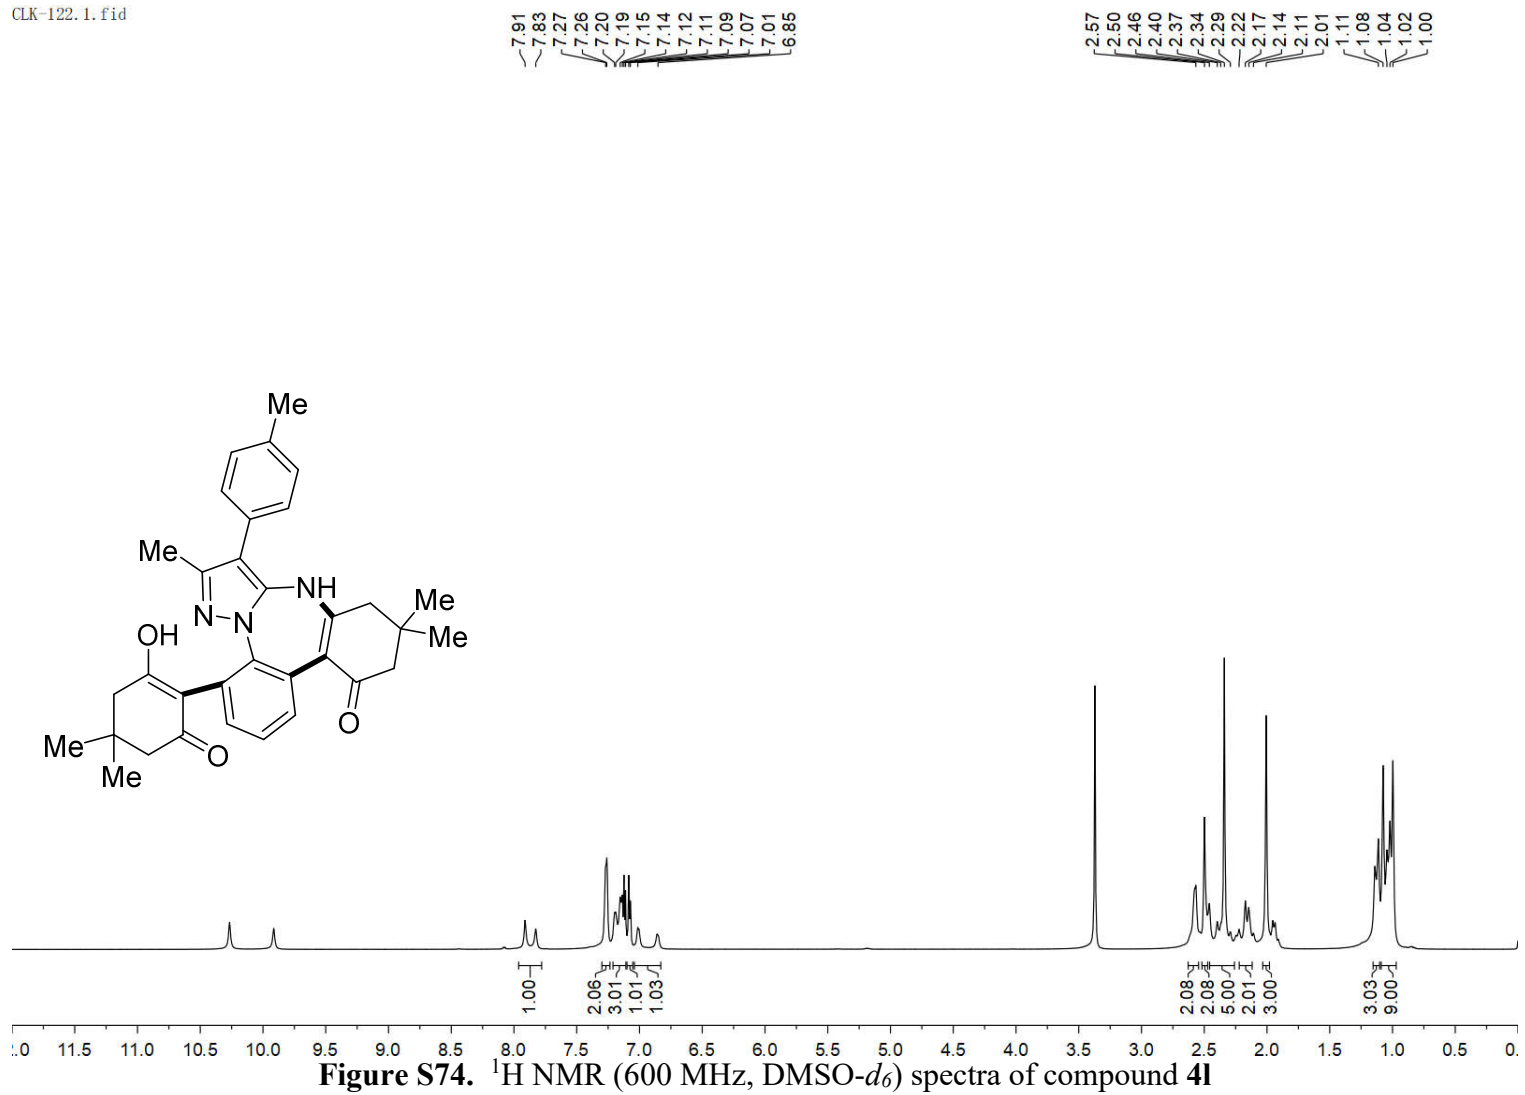

Figure S74. <sup>1</sup>H NMR (600 MHz, DMSO-*d*<sub>6</sub>) spectra of compound 4I

CLK-122.2.fid

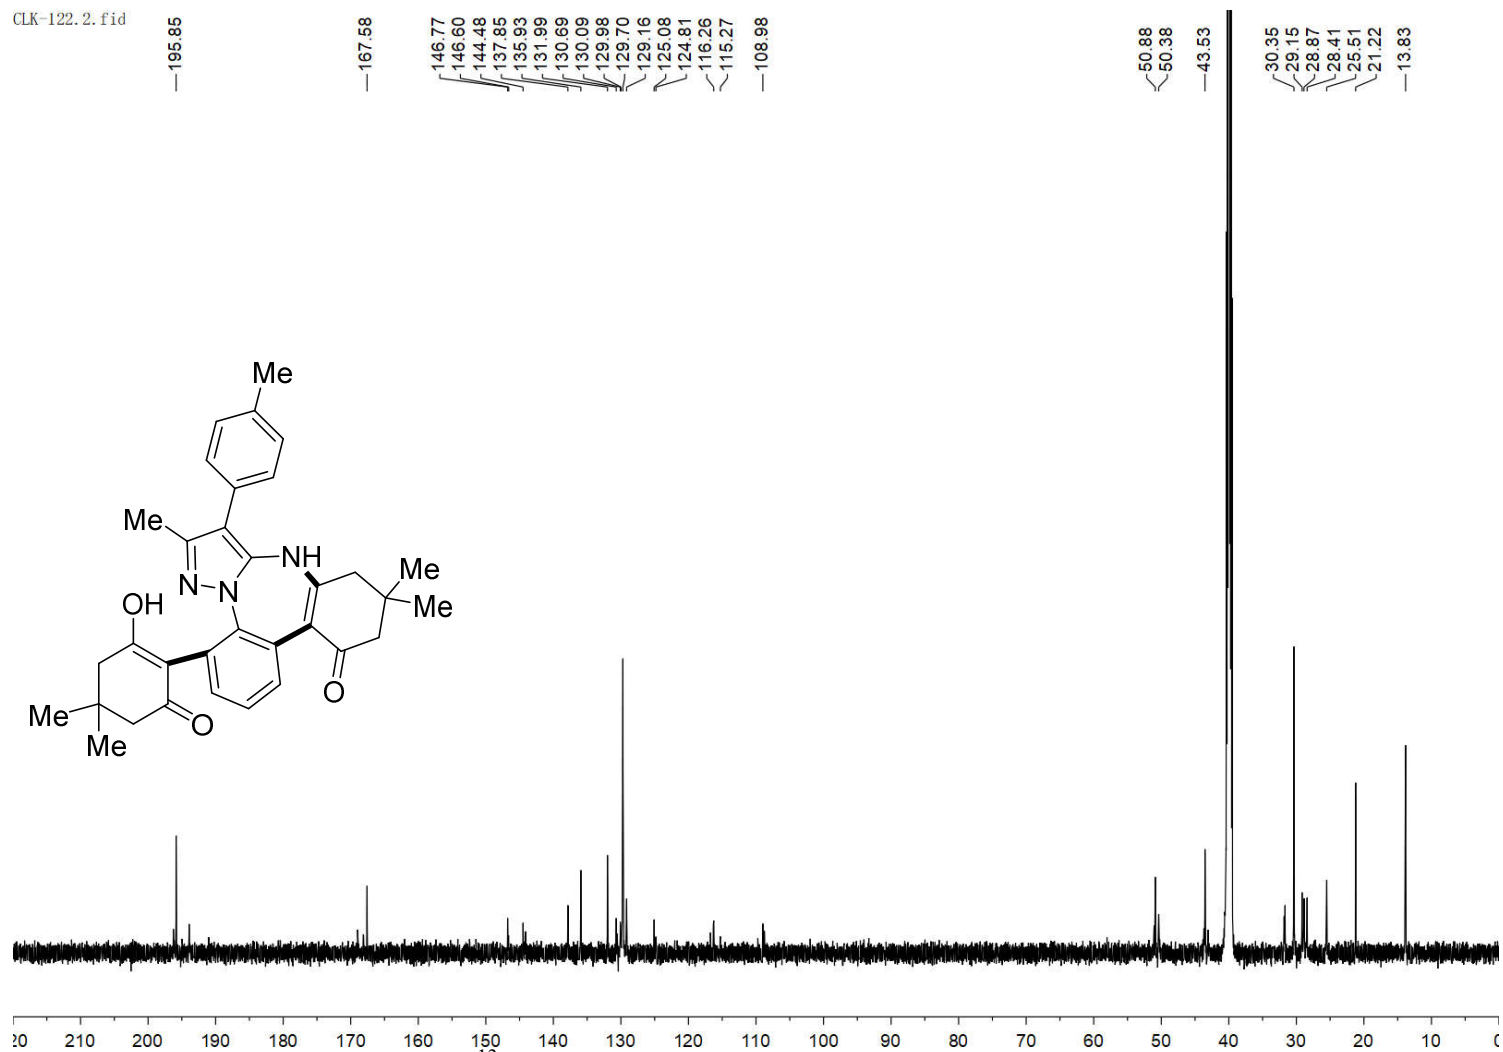

Figure S75. <sup>13</sup>C NMR (150 MHz, DMSO-*d*<sub>6</sub>) spectra of compound 41

CLK-107.1.fid

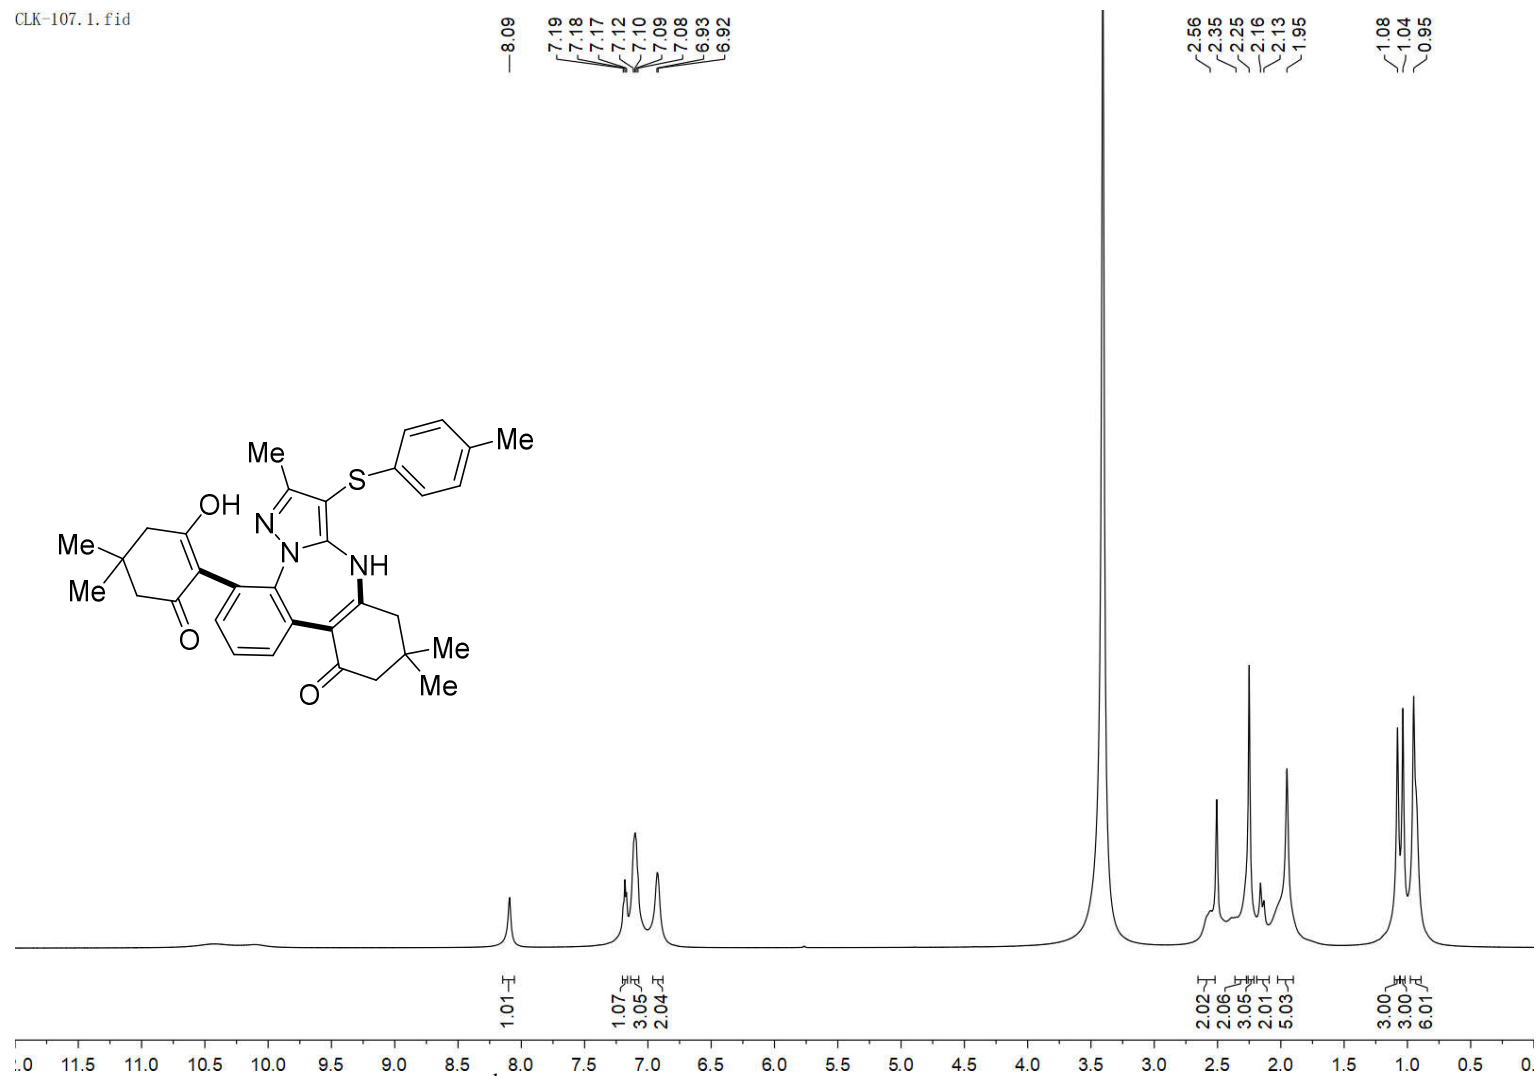

CLK-107.2.fid

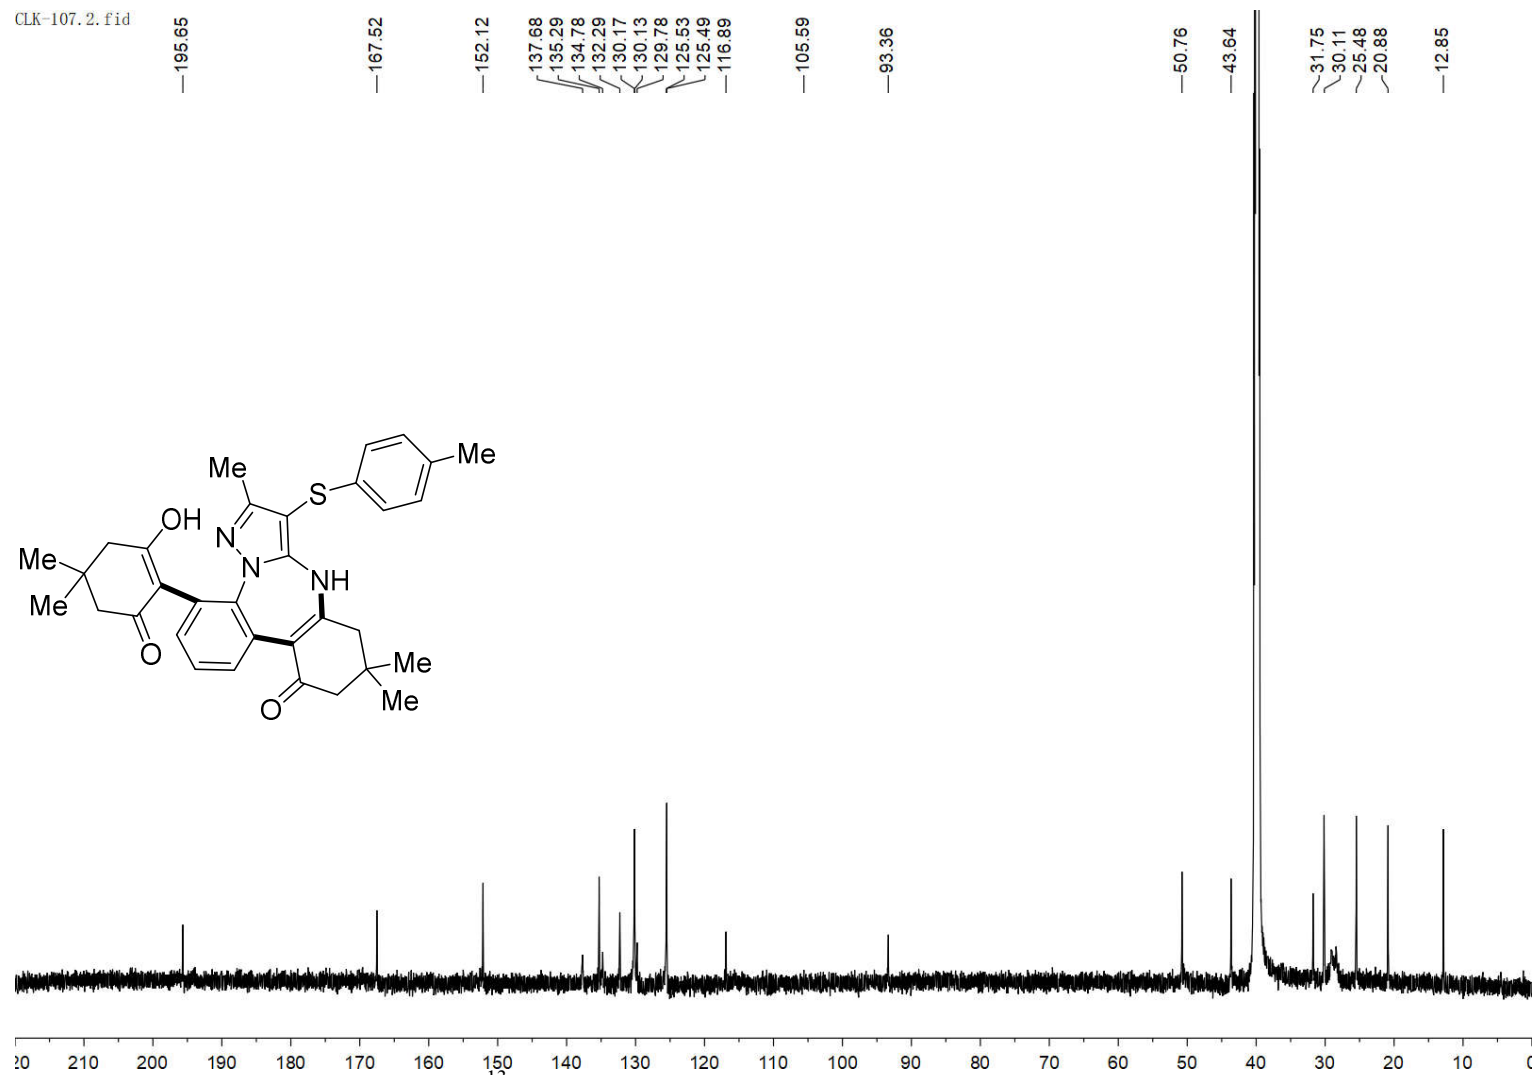

Figure S77.  $^{13}\text{C}$  NMR (150 MHz, DMSO- $d_6$ ) spectra of compound 4m

CLK-139-1.1.fid

—10.41

7.19  
7.18  
7.17  
7.08  
7.07  
6.75  
6.68

2.66  
2.62  
2.38  
2.27  
2.15  
2.10  
1.99  
1.94

1.07  
1.03  
0.96

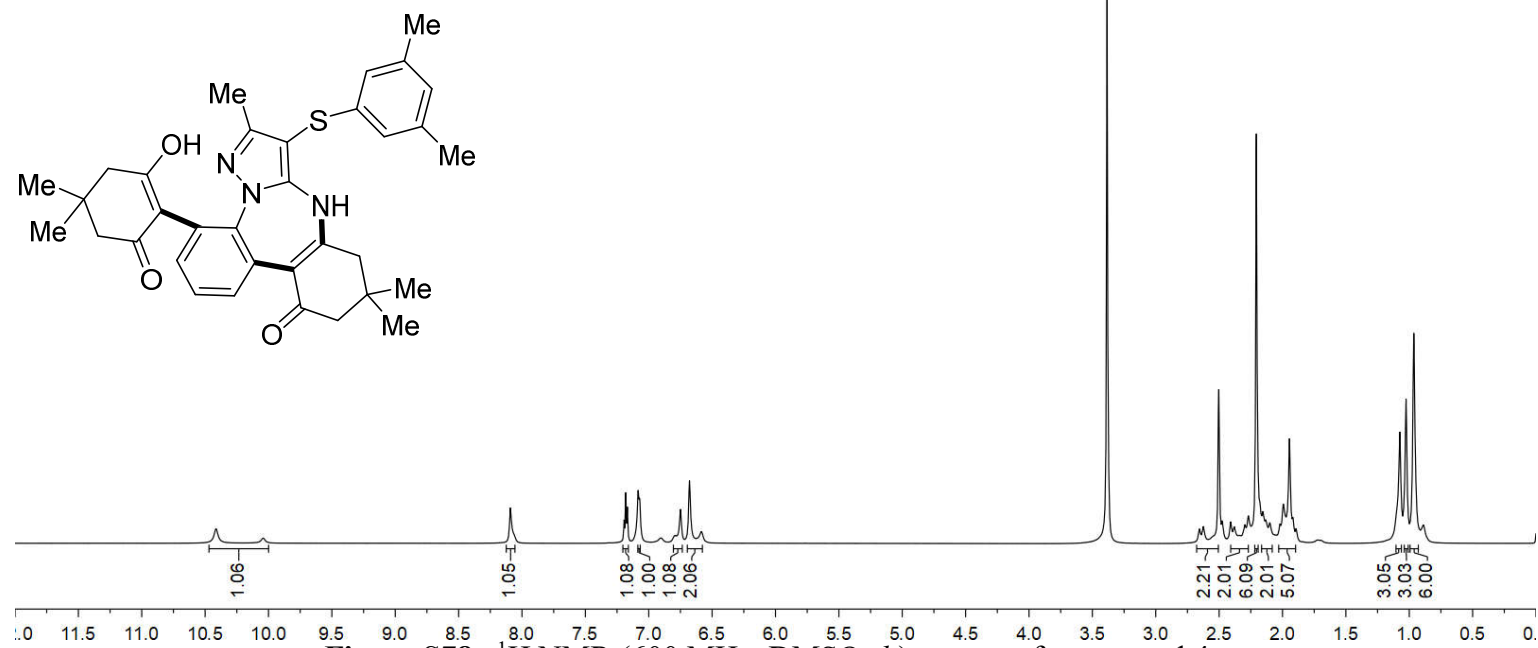

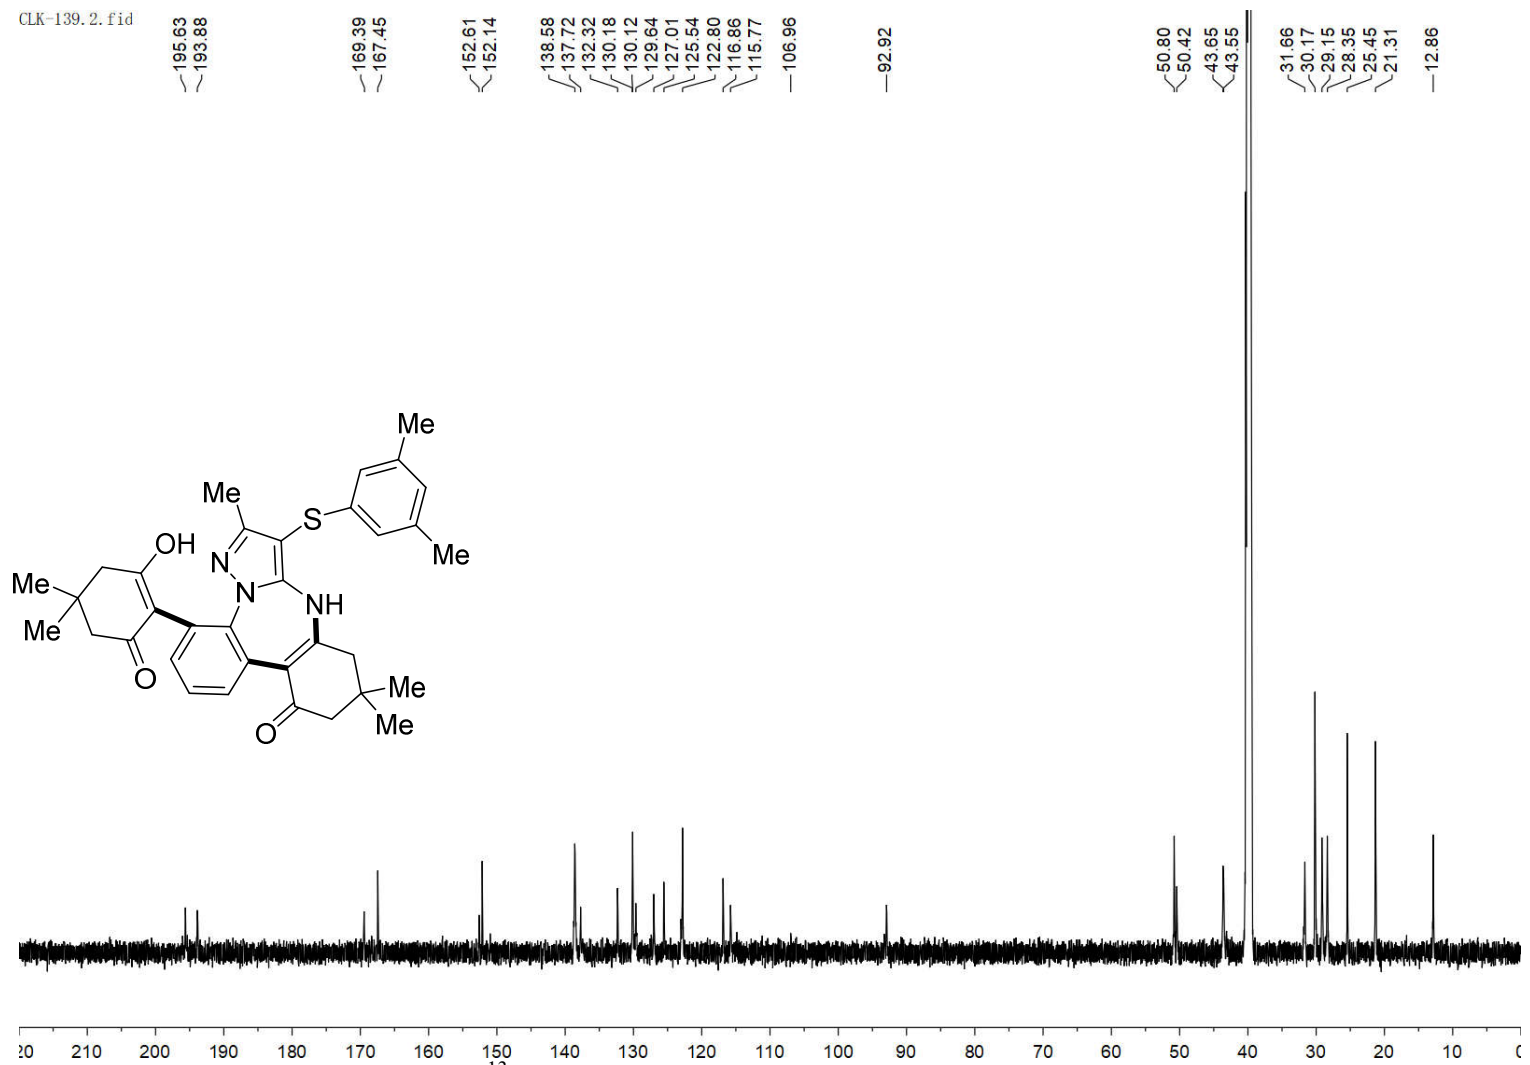

Figure S79.  $^{13}\text{C}$  NMR (150 MHz,  $\text{DMSO}-d_6$ ) spectra of compound **4n**



CLK-136.1.fid

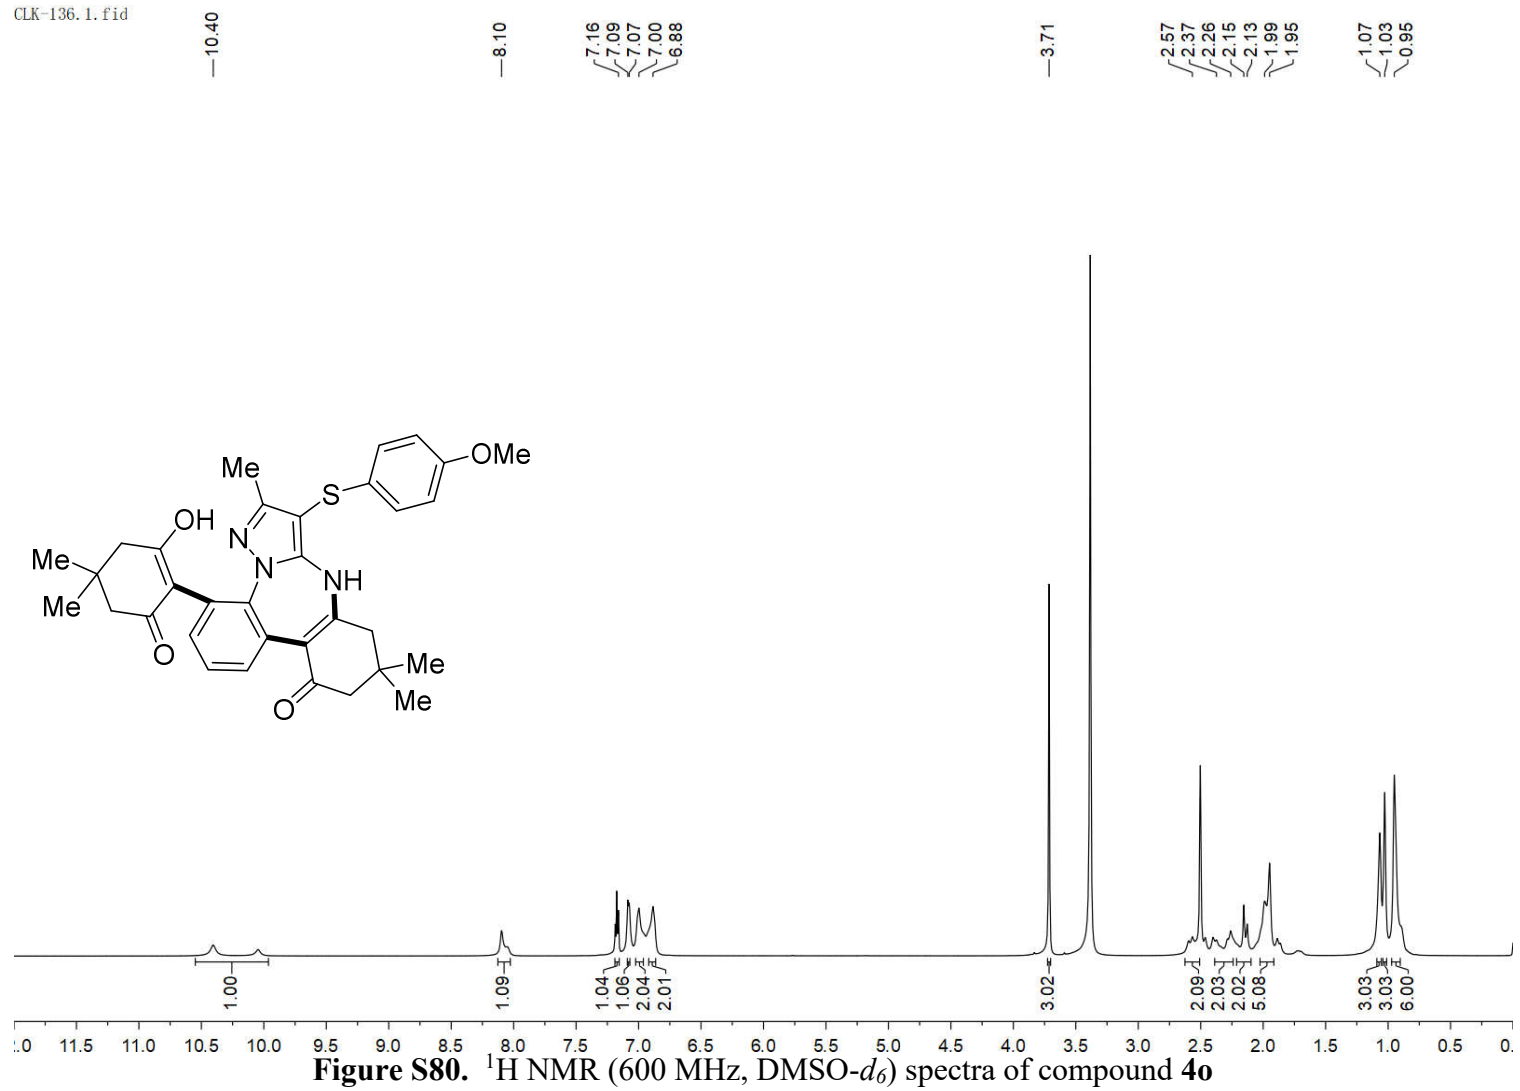

CLK-136.2.fid

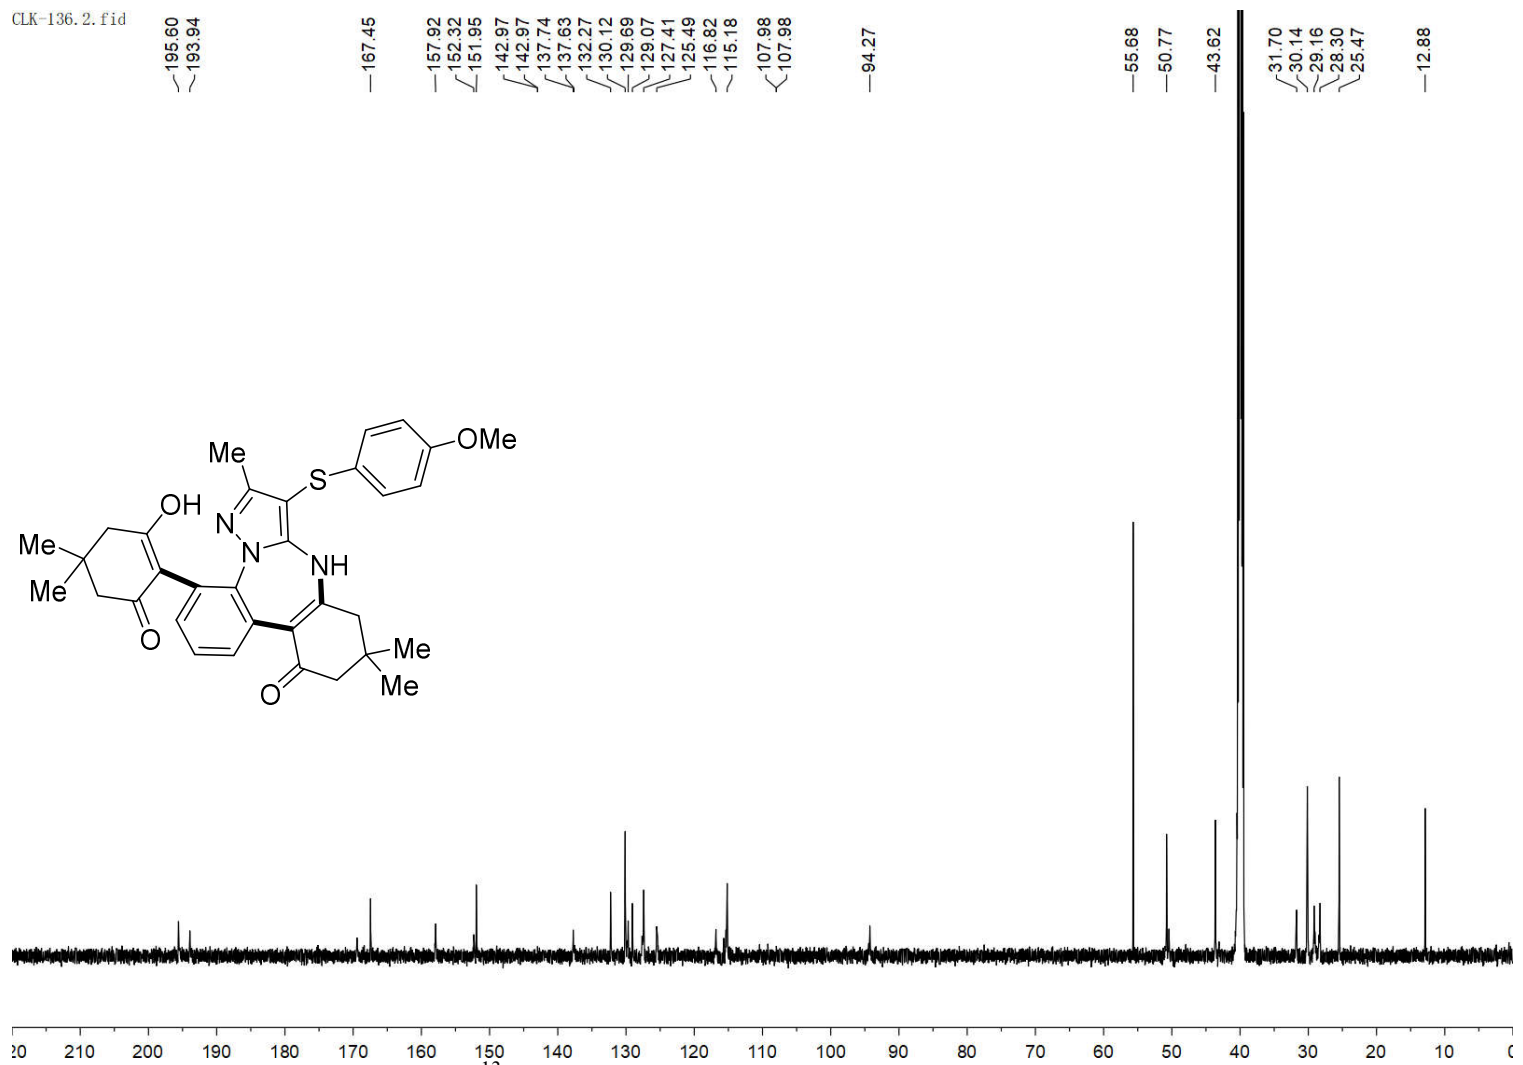

Figure S81. <sup>13</sup>C NMR (150 MHz, DMSO-*d*<sub>6</sub>) spectra of compound 40

CLK-133.2.fid

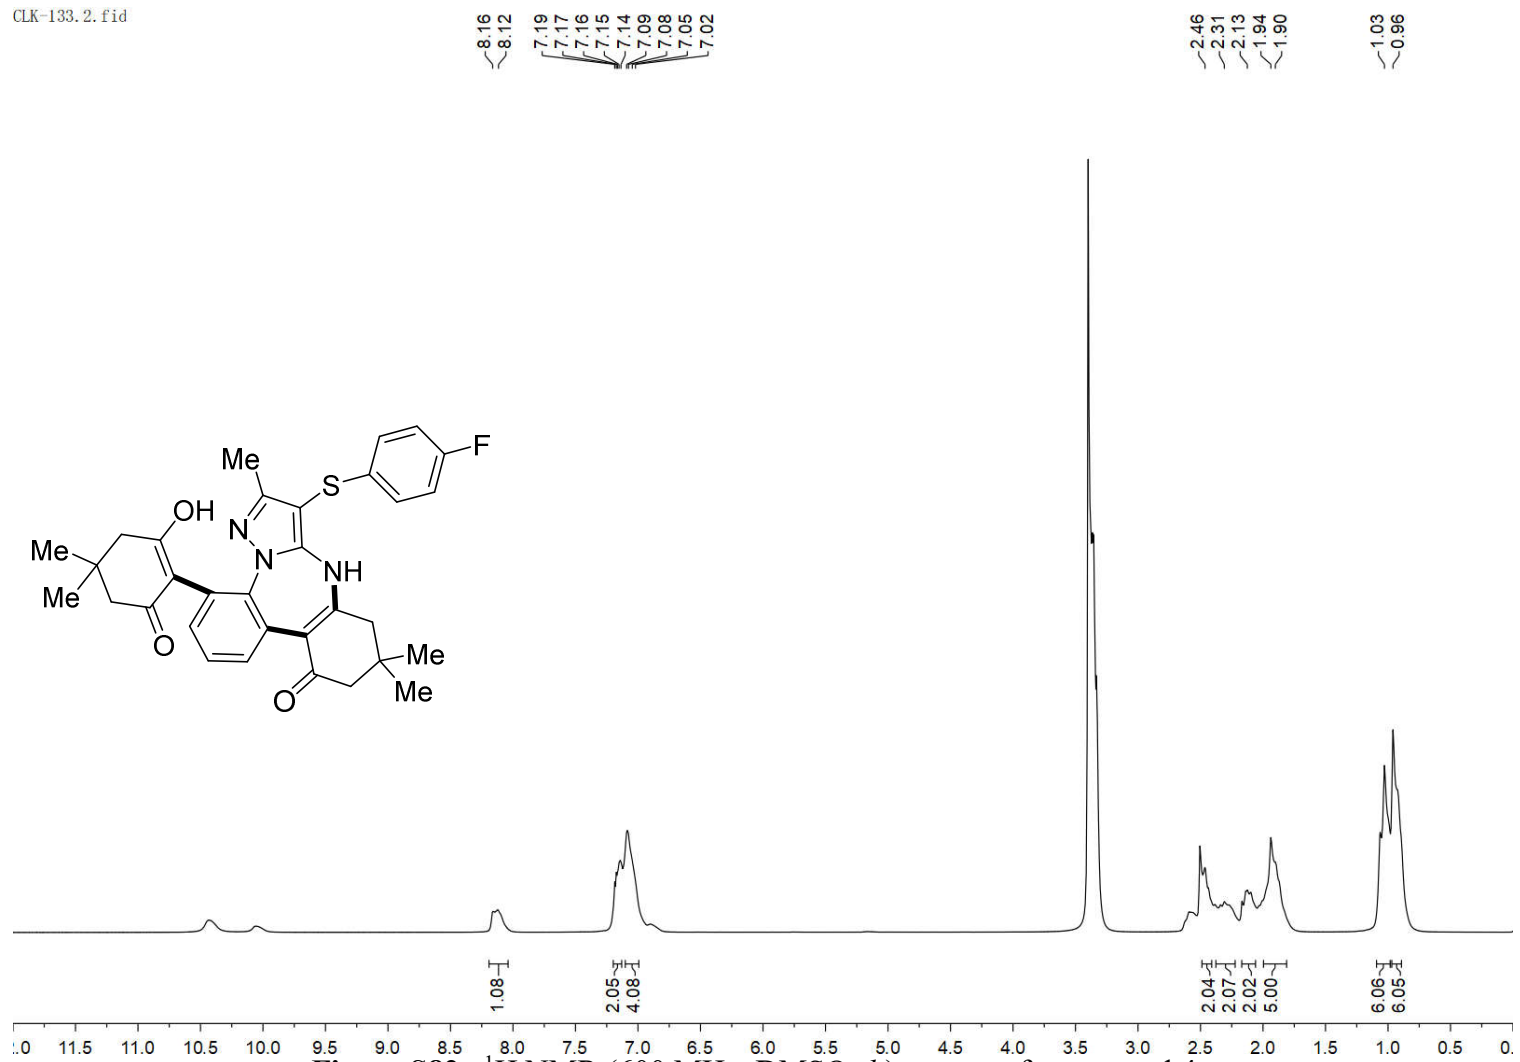

CLK-133.1.fid

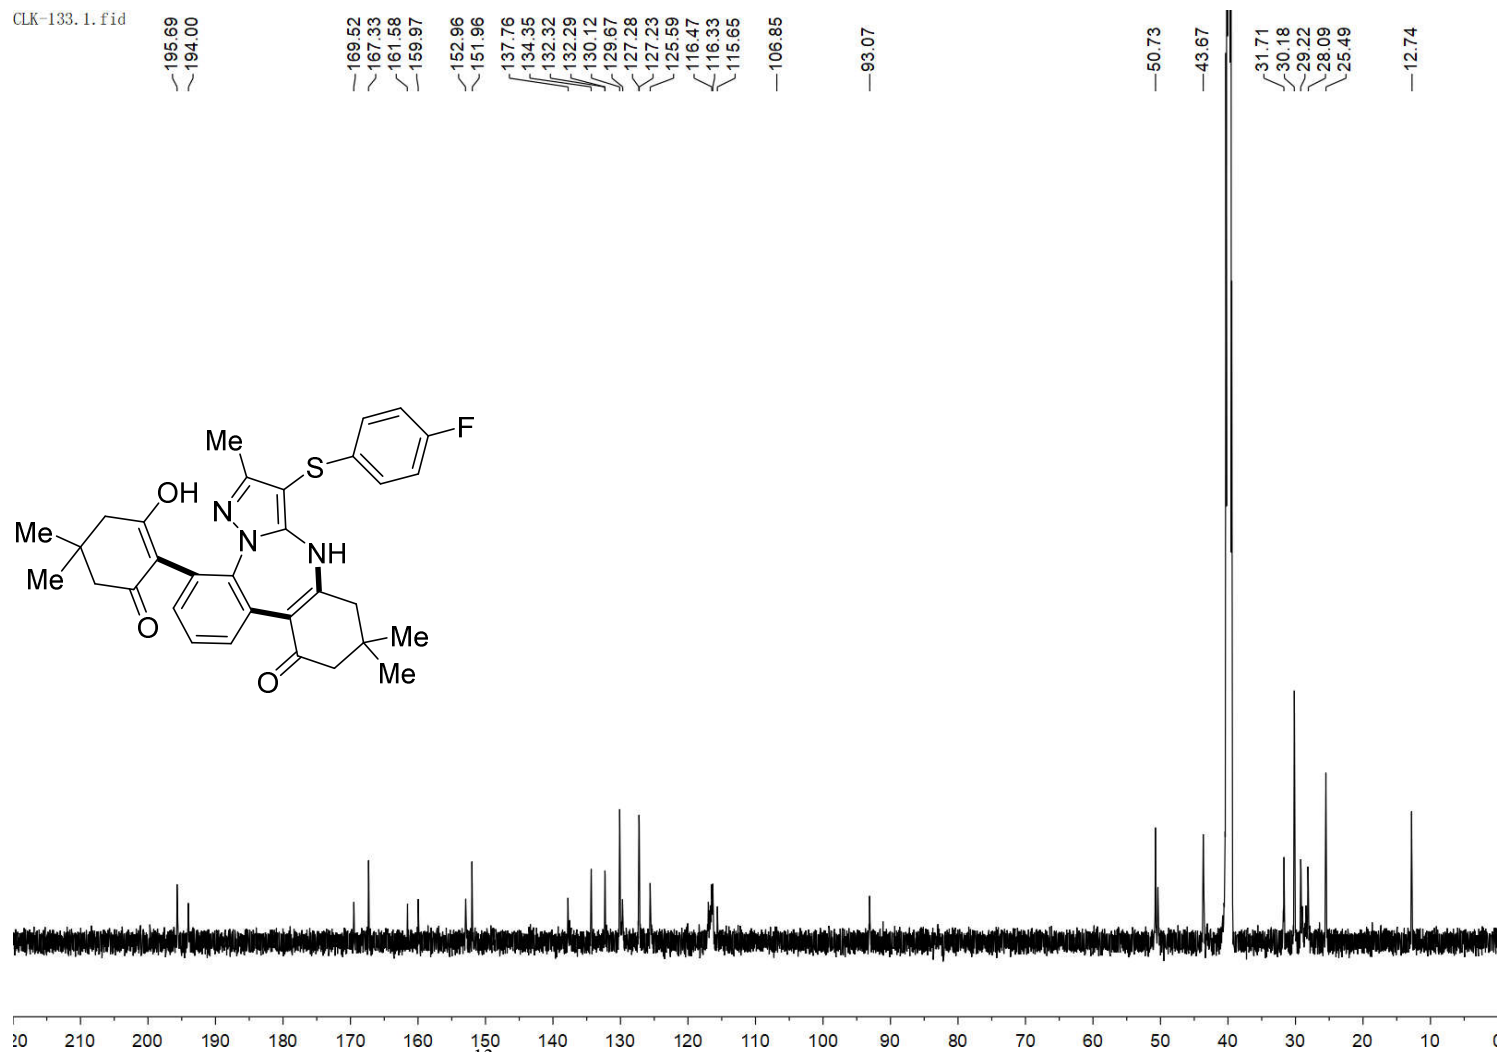

Figure S83. <sup>13</sup>C NMR (150 MHz, DMSO-*d*<sub>6</sub>) spectra of compound 4p

CLK-123.1.fid

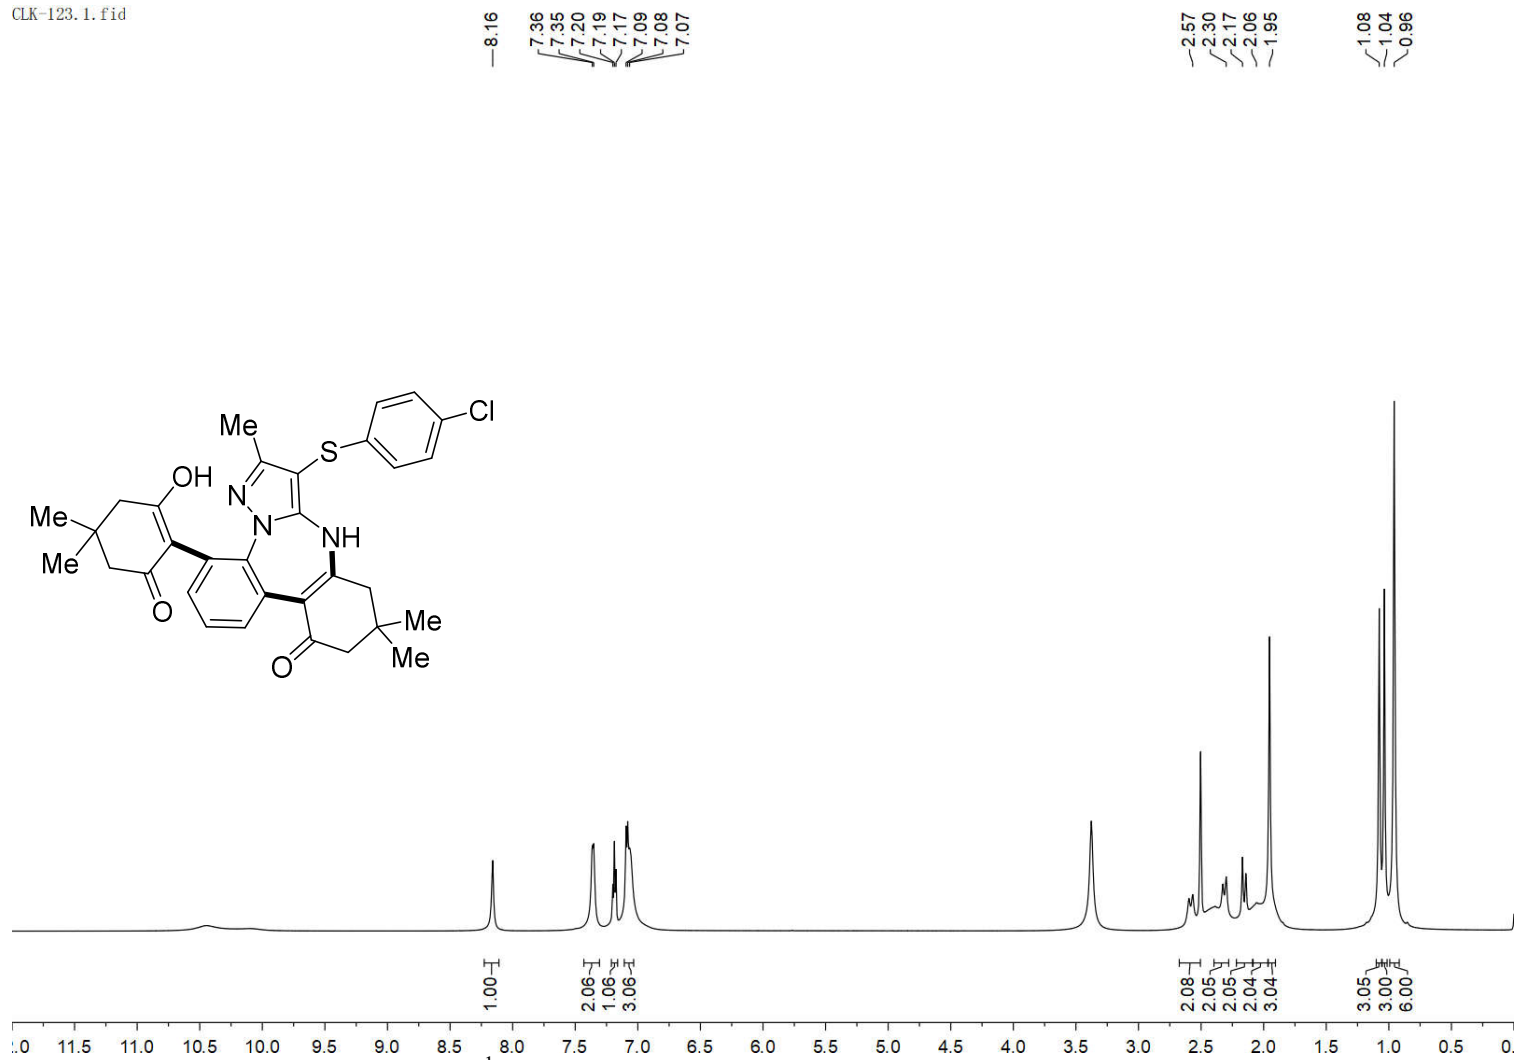

CLK-123.2.fid

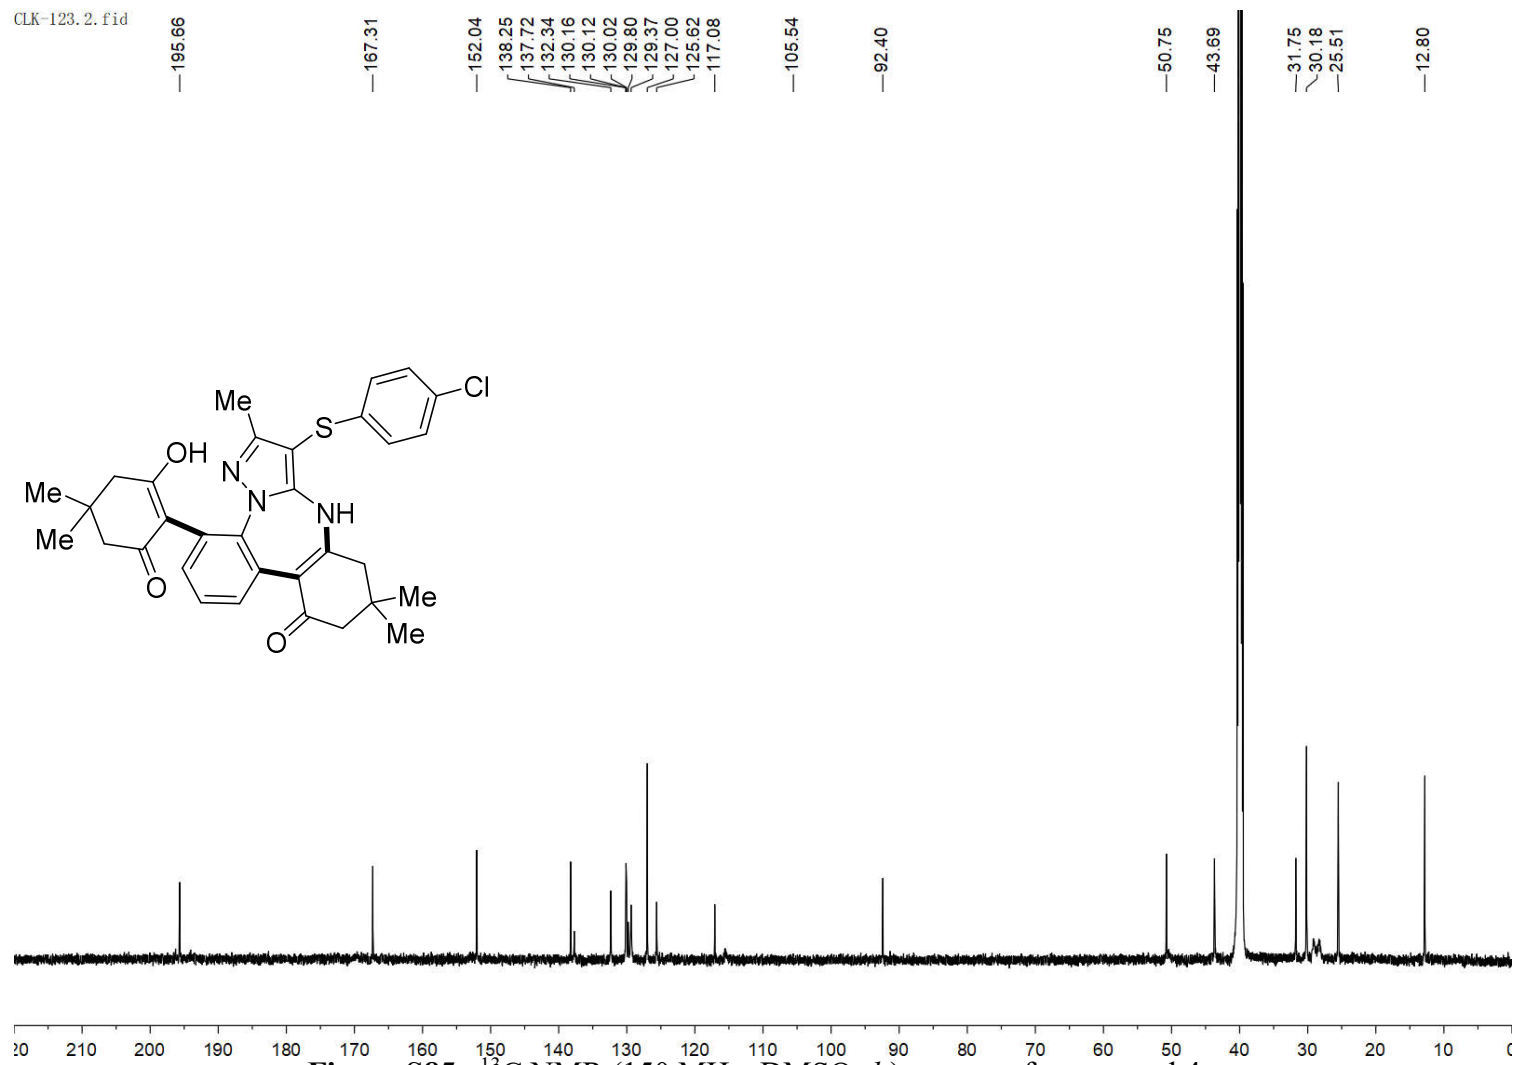

Figure S85. <sup>13</sup>C NMR (150 MHz, DMSO-*d*<sub>6</sub>) spectra of compound 4q

CLK-132. 2. fid

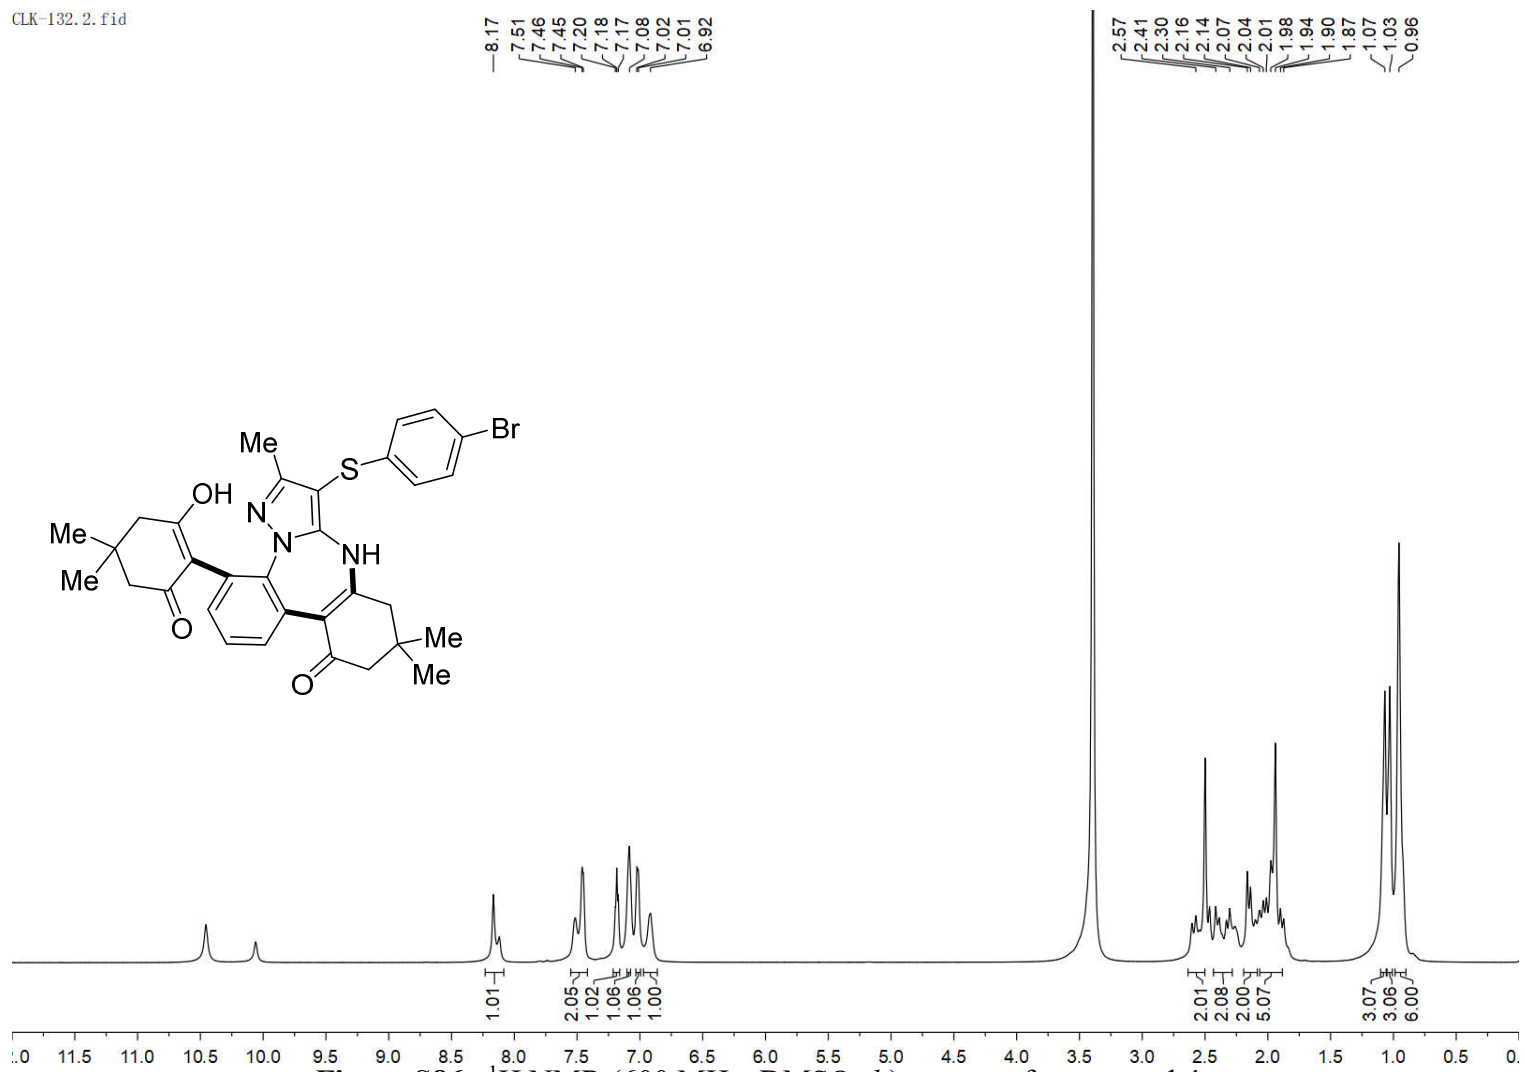

**Figure S86.** <sup>1</sup>H NMR (600 MHz, DMSO-*d*<sub>6</sub>) spectra of compound **4r**

CLK-132.1.fid

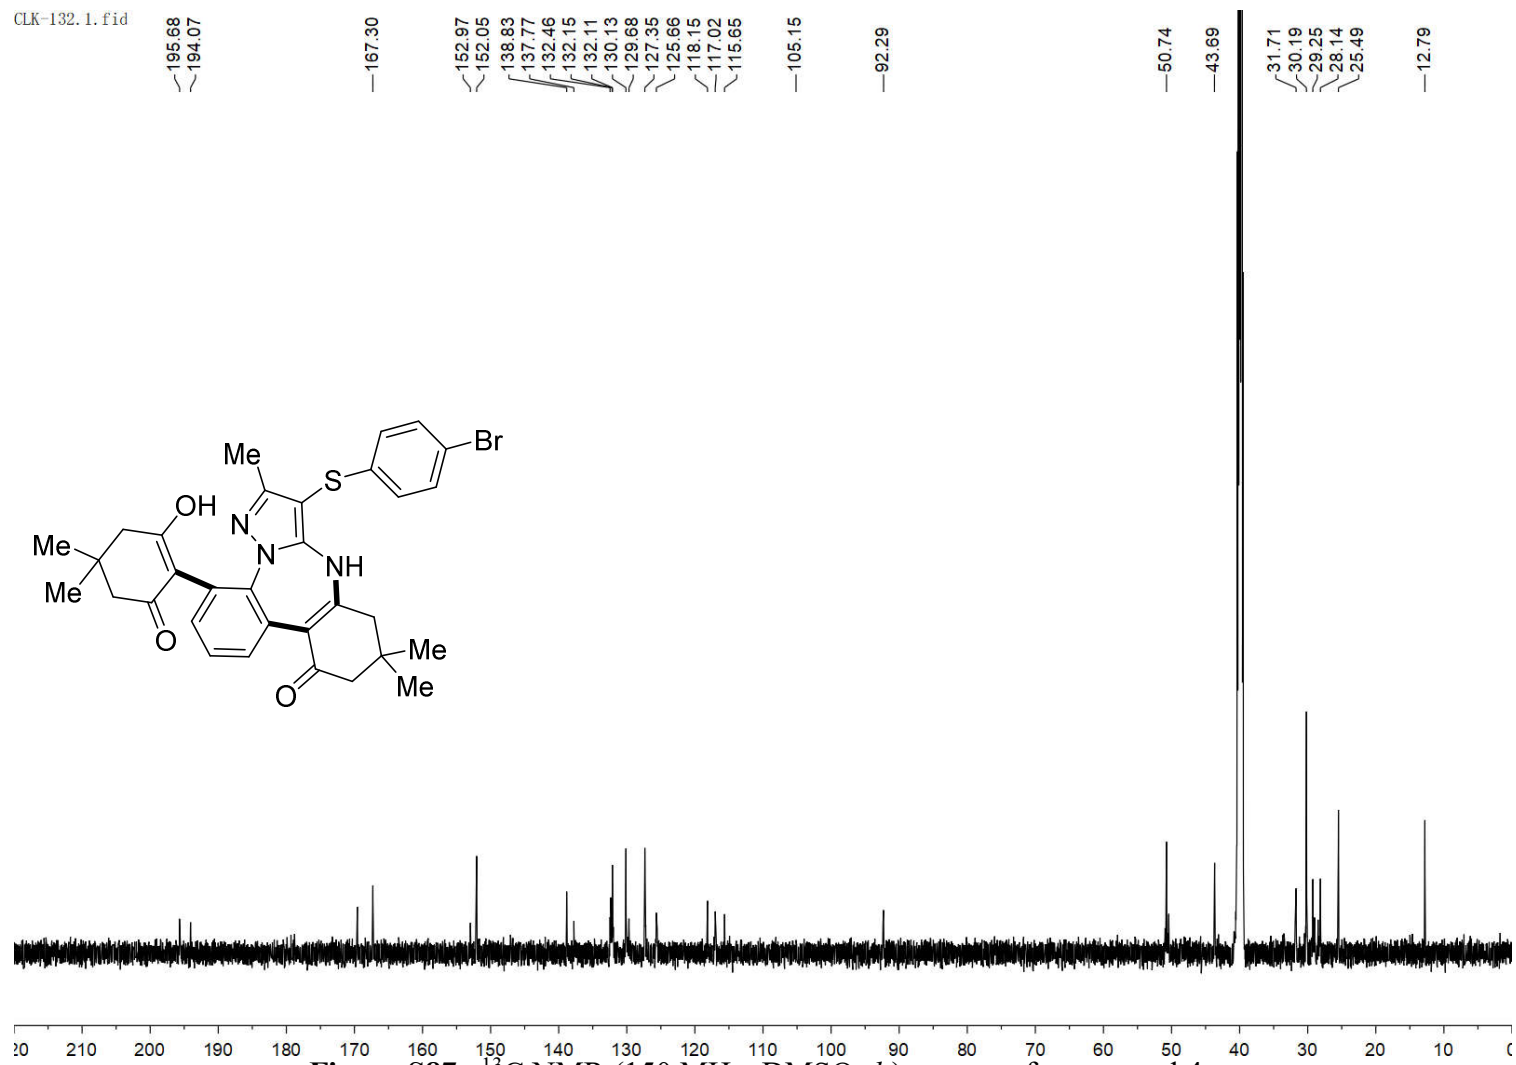

Figure S87.  $^{13}\text{C}$  NMR (150 MHz,  $\text{DMSO-}d_6$ ) spectra of compound **4r**



CLK-138.1.fid

—10.52

8.28  
8.24  
8.12  
7.36  
7.35  
7.22  
7.21  
7.20  
7.11  
7.10

2.59  
2.44  
2.39  
2.27  
2.18  
2.16  
2.09  
2.07  
1.96  
1.09  
1.05  
0.97

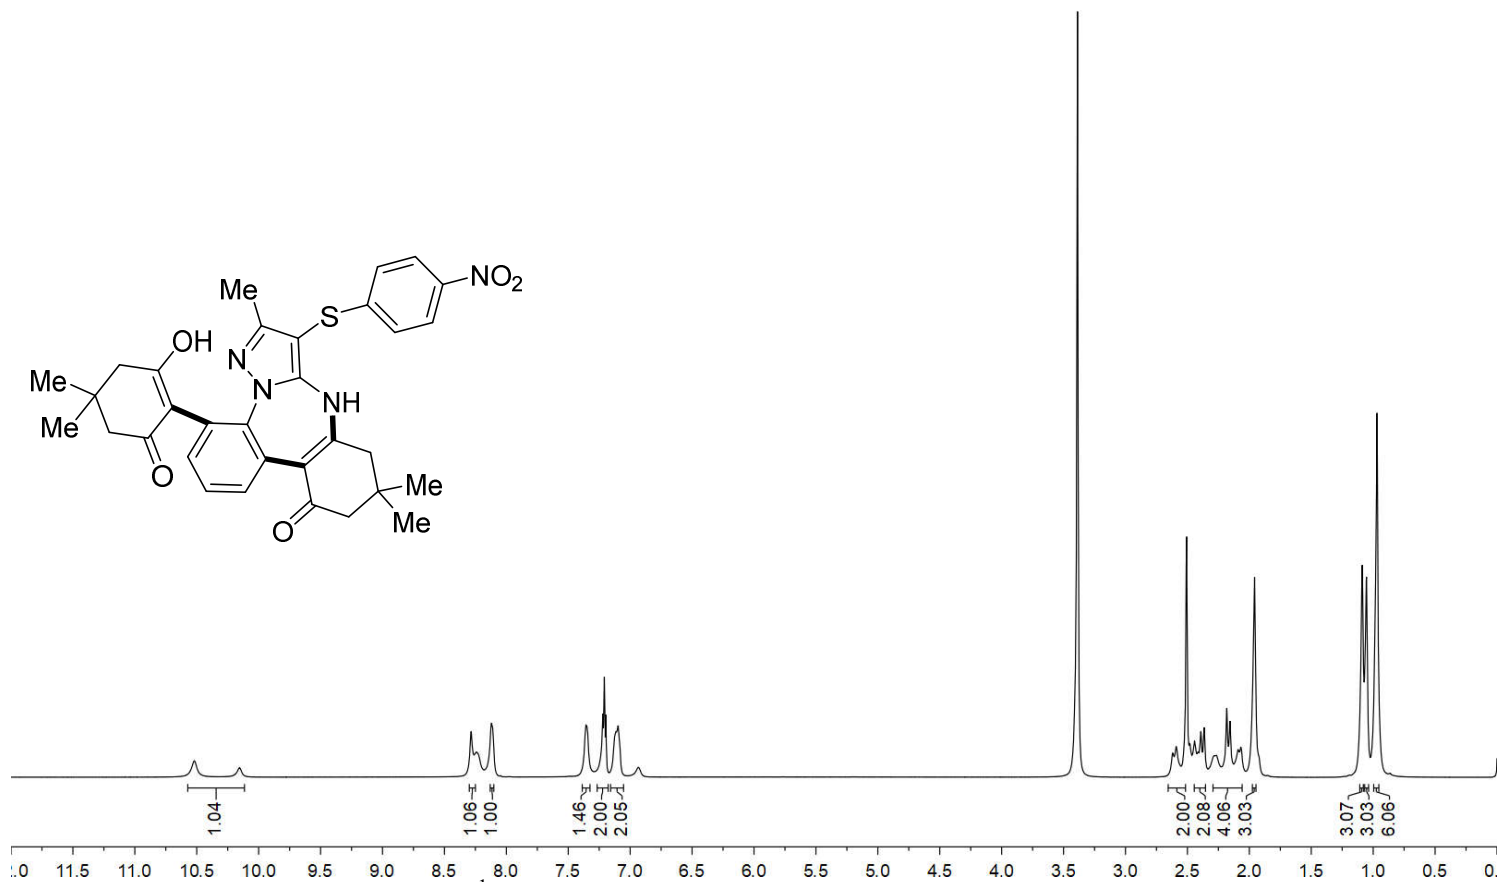

CLK-138-1.1.fid

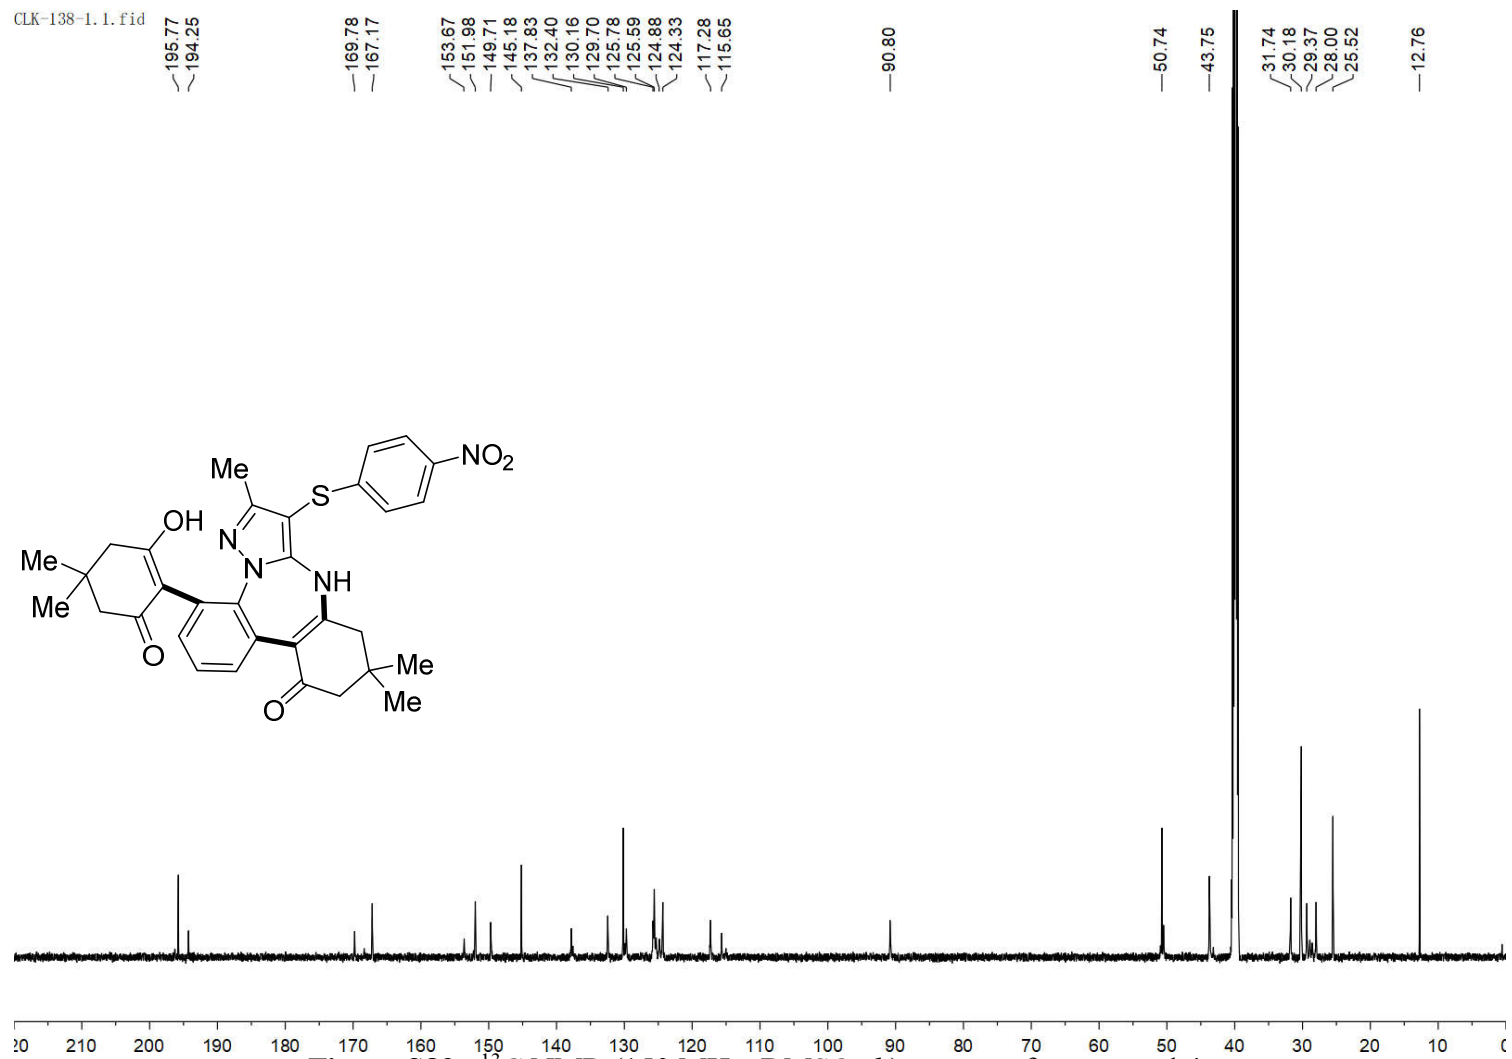

CLK-134.3.fid

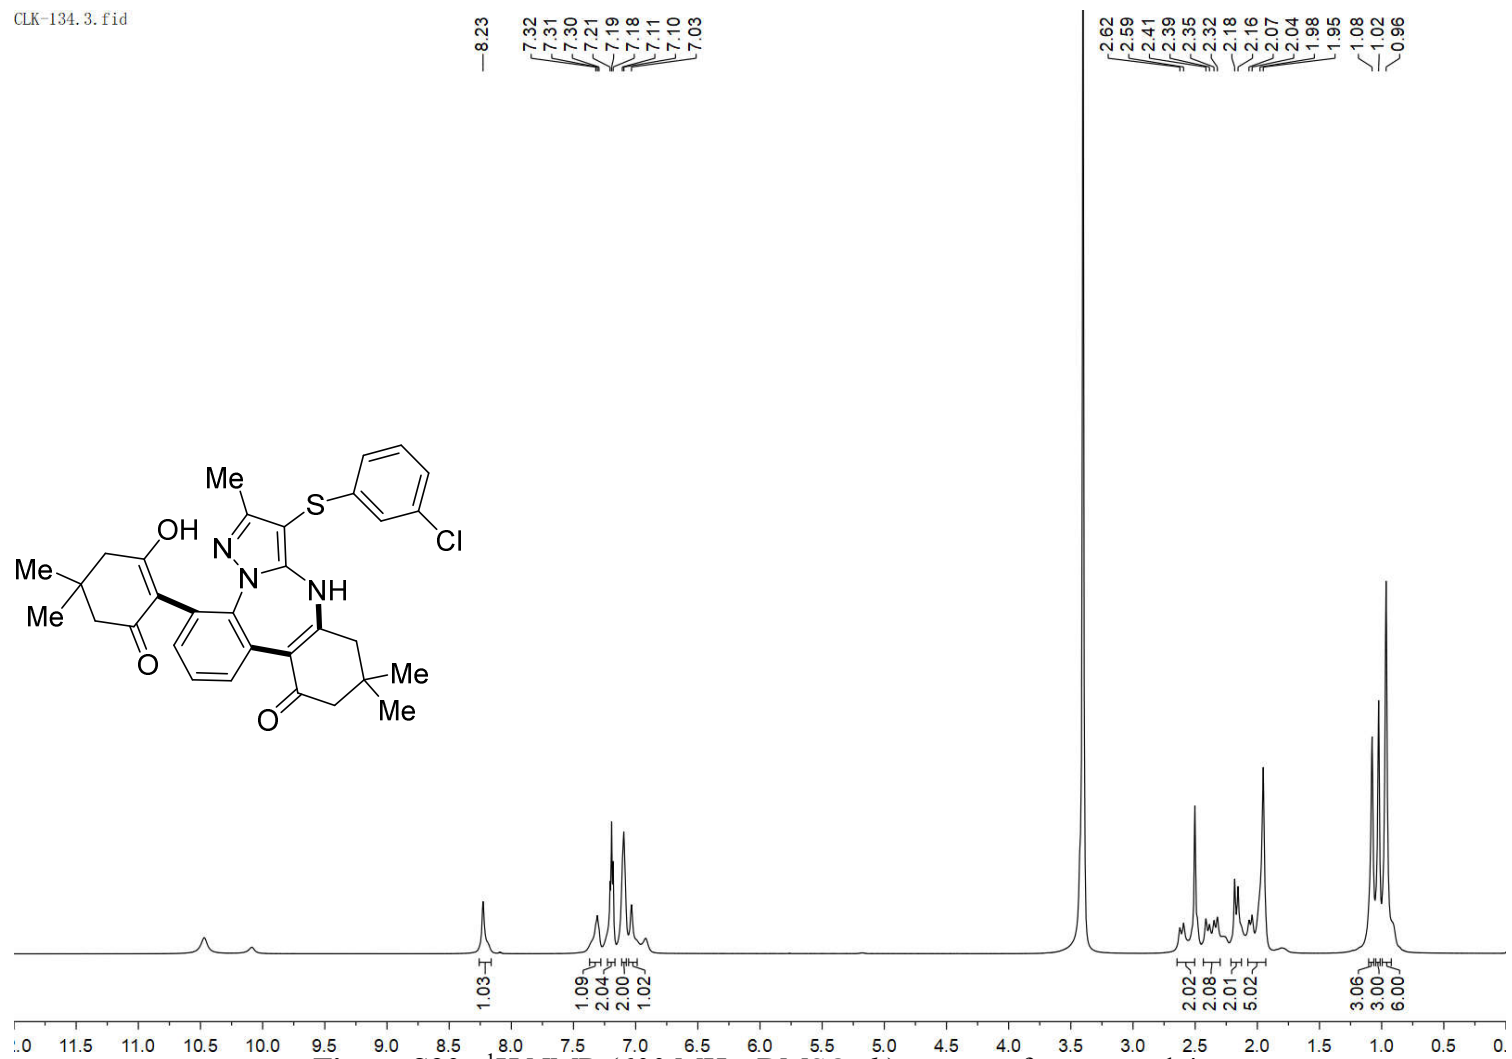

CLK-134.4.fid

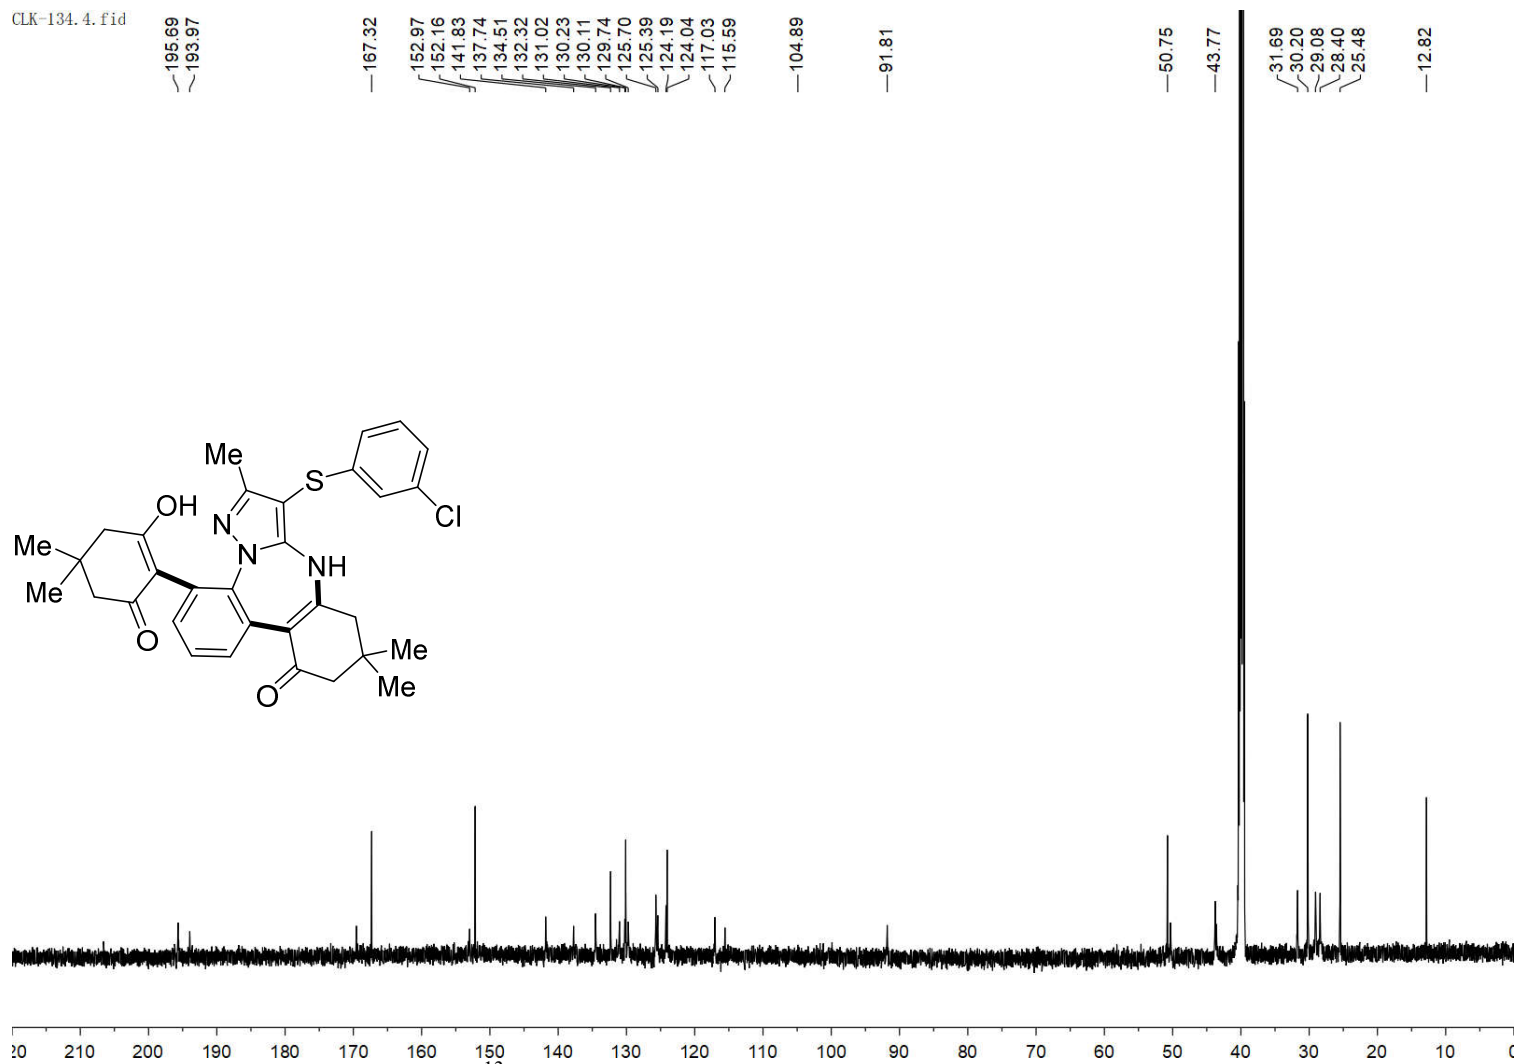

Figure S91.  $^{13}\text{C}$  NMR (150 MHz,  $\text{DMSO}-d_6$ ) spectra of compound 4t

CLK-129.1.fid

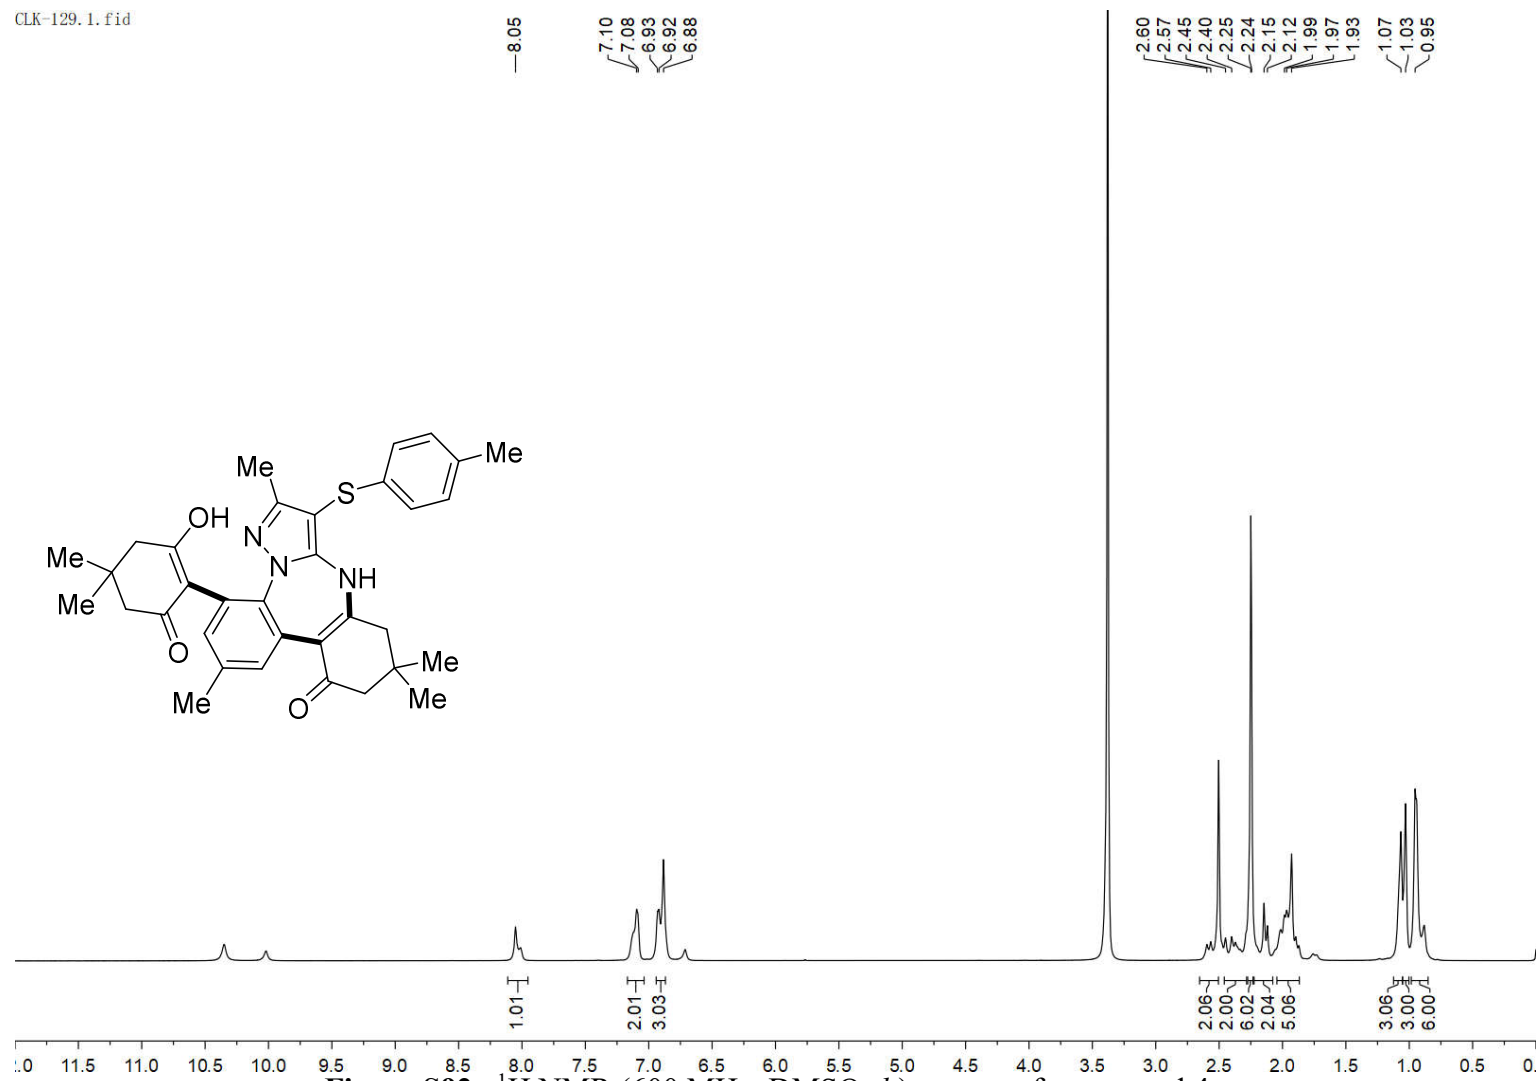

Figure S92. <sup>1</sup>H NMR (600 MHz, DMSO-*d*<sub>6</sub>) spectra of compound 4u

CLK-129.4.fid

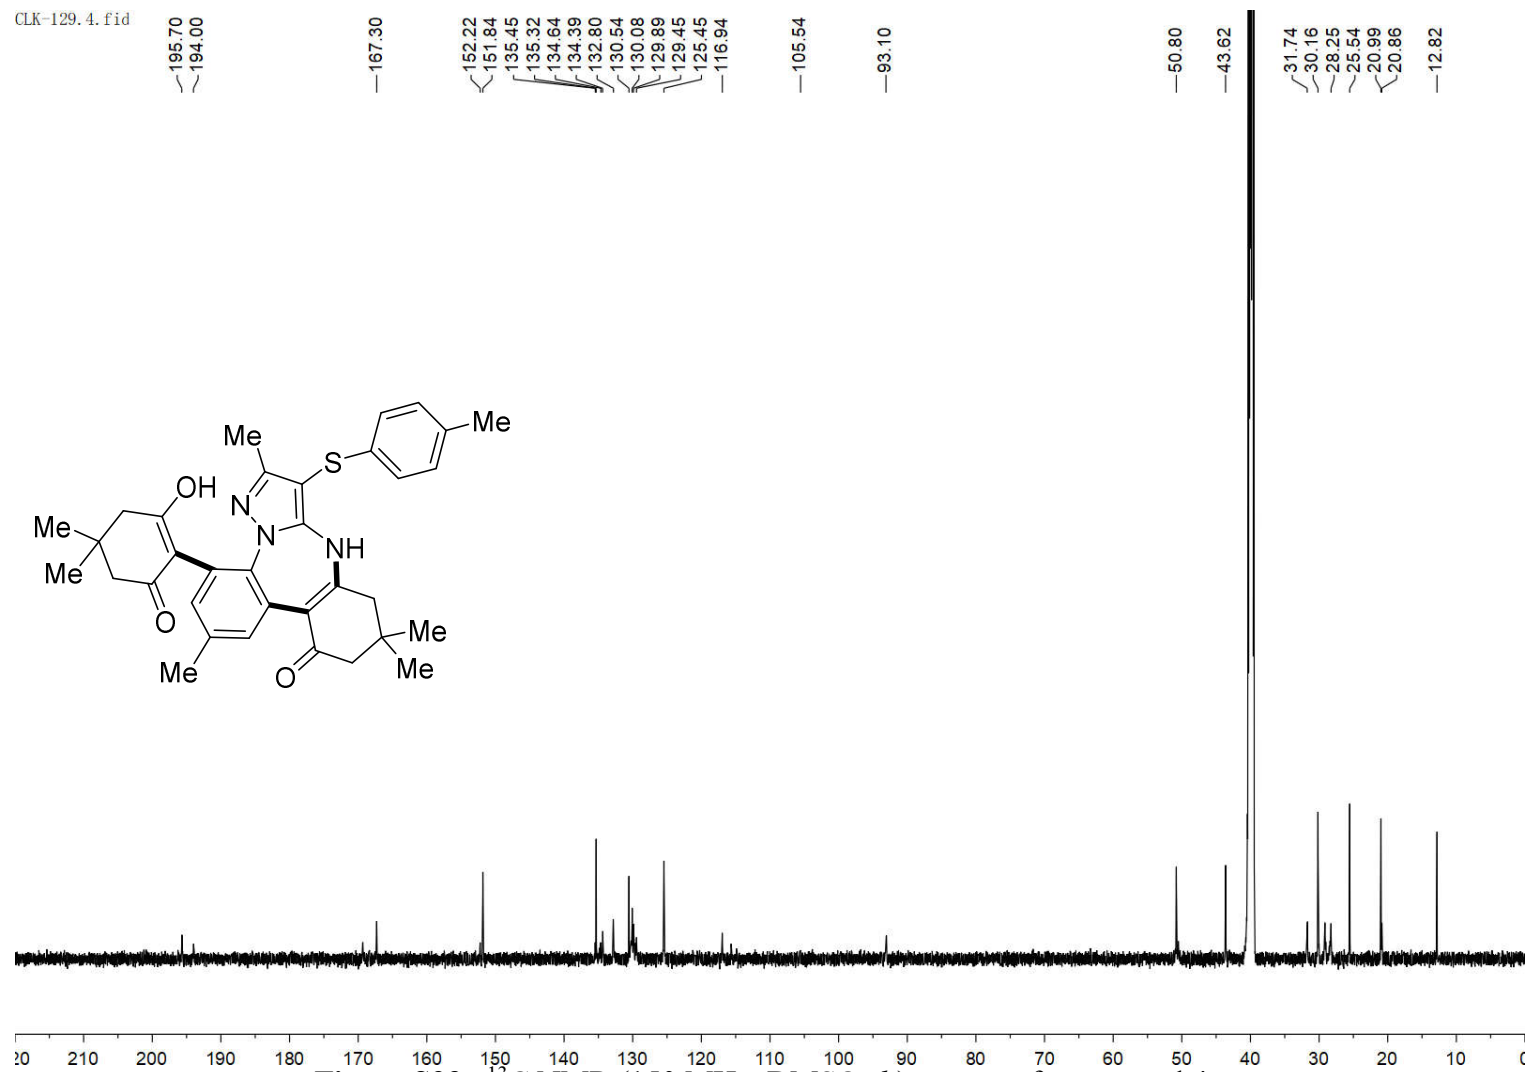

Figure S93.  $^{13}\text{C}$  NMR (150 MHz,  $\text{DMSO-}d_6$ ) spectra of compound **4u**

CLK-130.1.fid

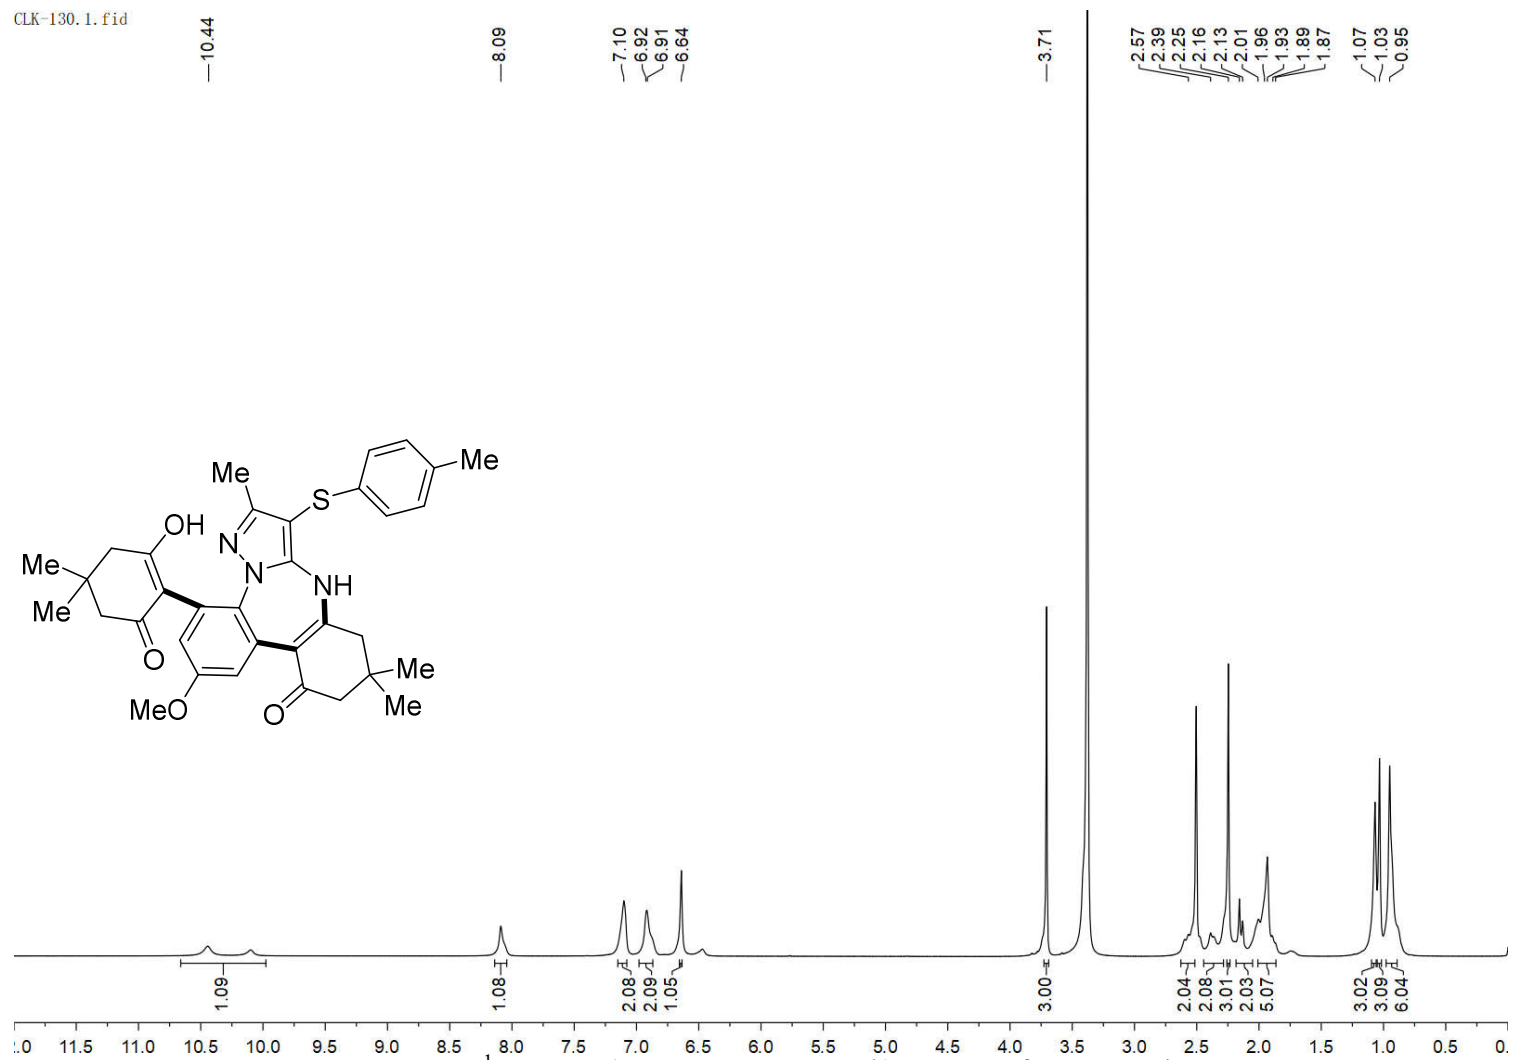

Figure S94. <sup>1</sup>H NMR (600 MHz, DMSO-*d*<sub>6</sub>) spectra of compound 4v

CLK-130.3.fid

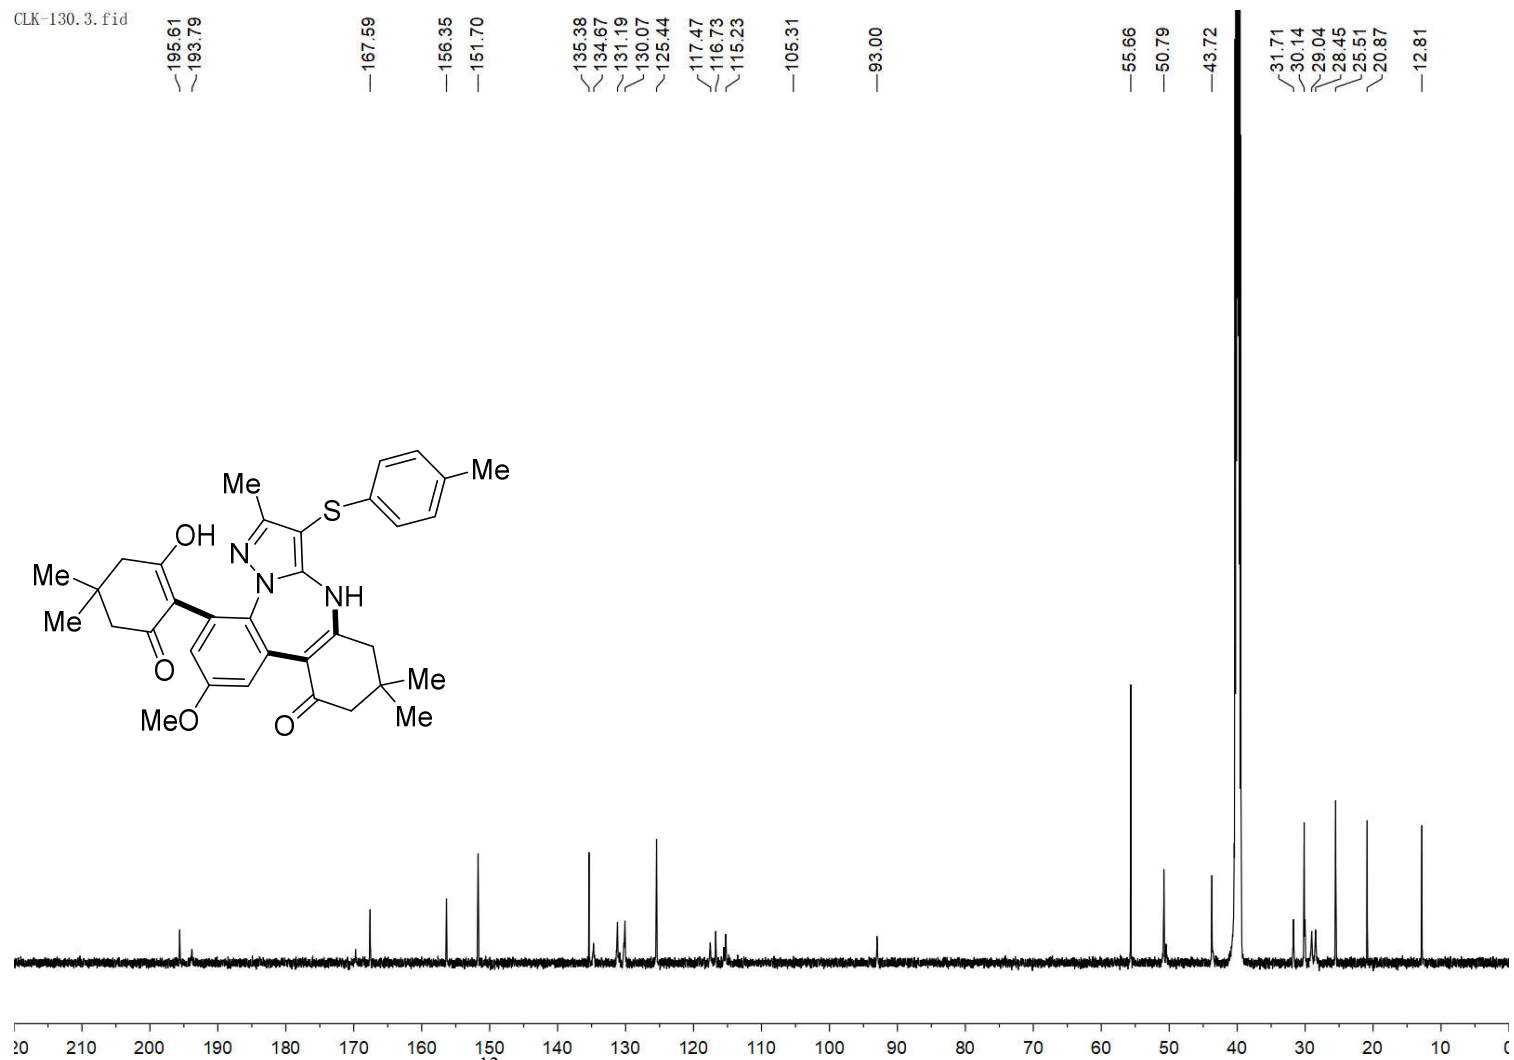

Figure S95.  $^{13}\text{C}$  NMR (150 MHz,  $\text{DMSO-}d_6$ ) spectra of compound **4v**



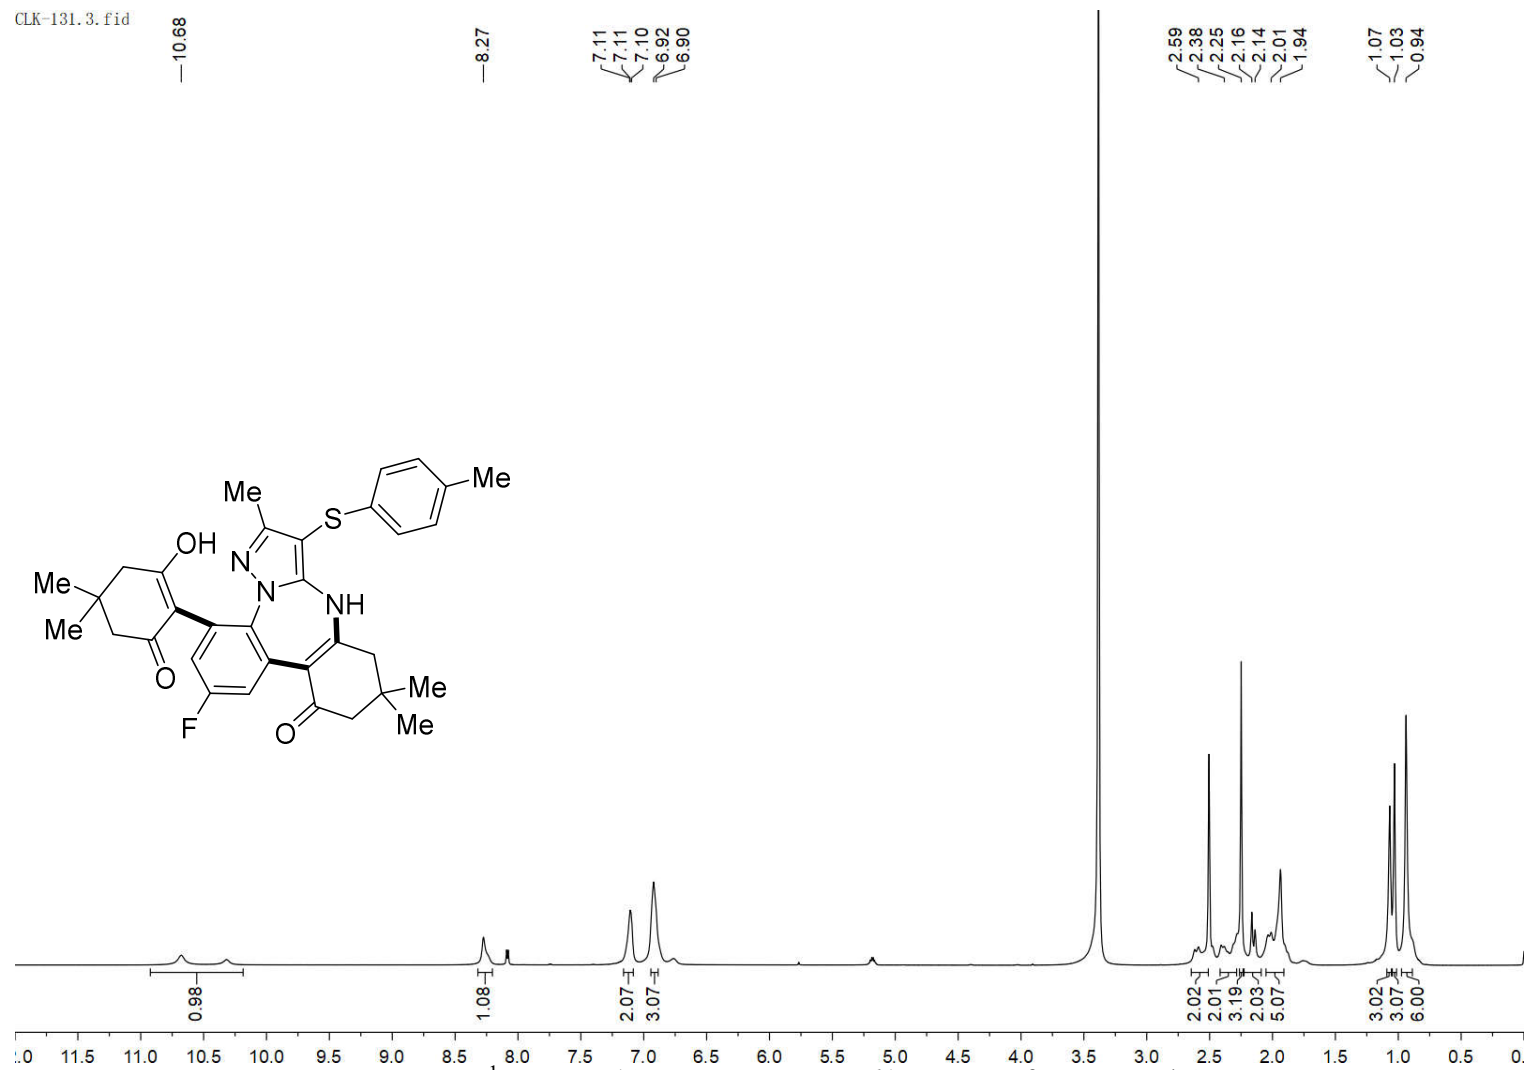

CLK-131.5.fid

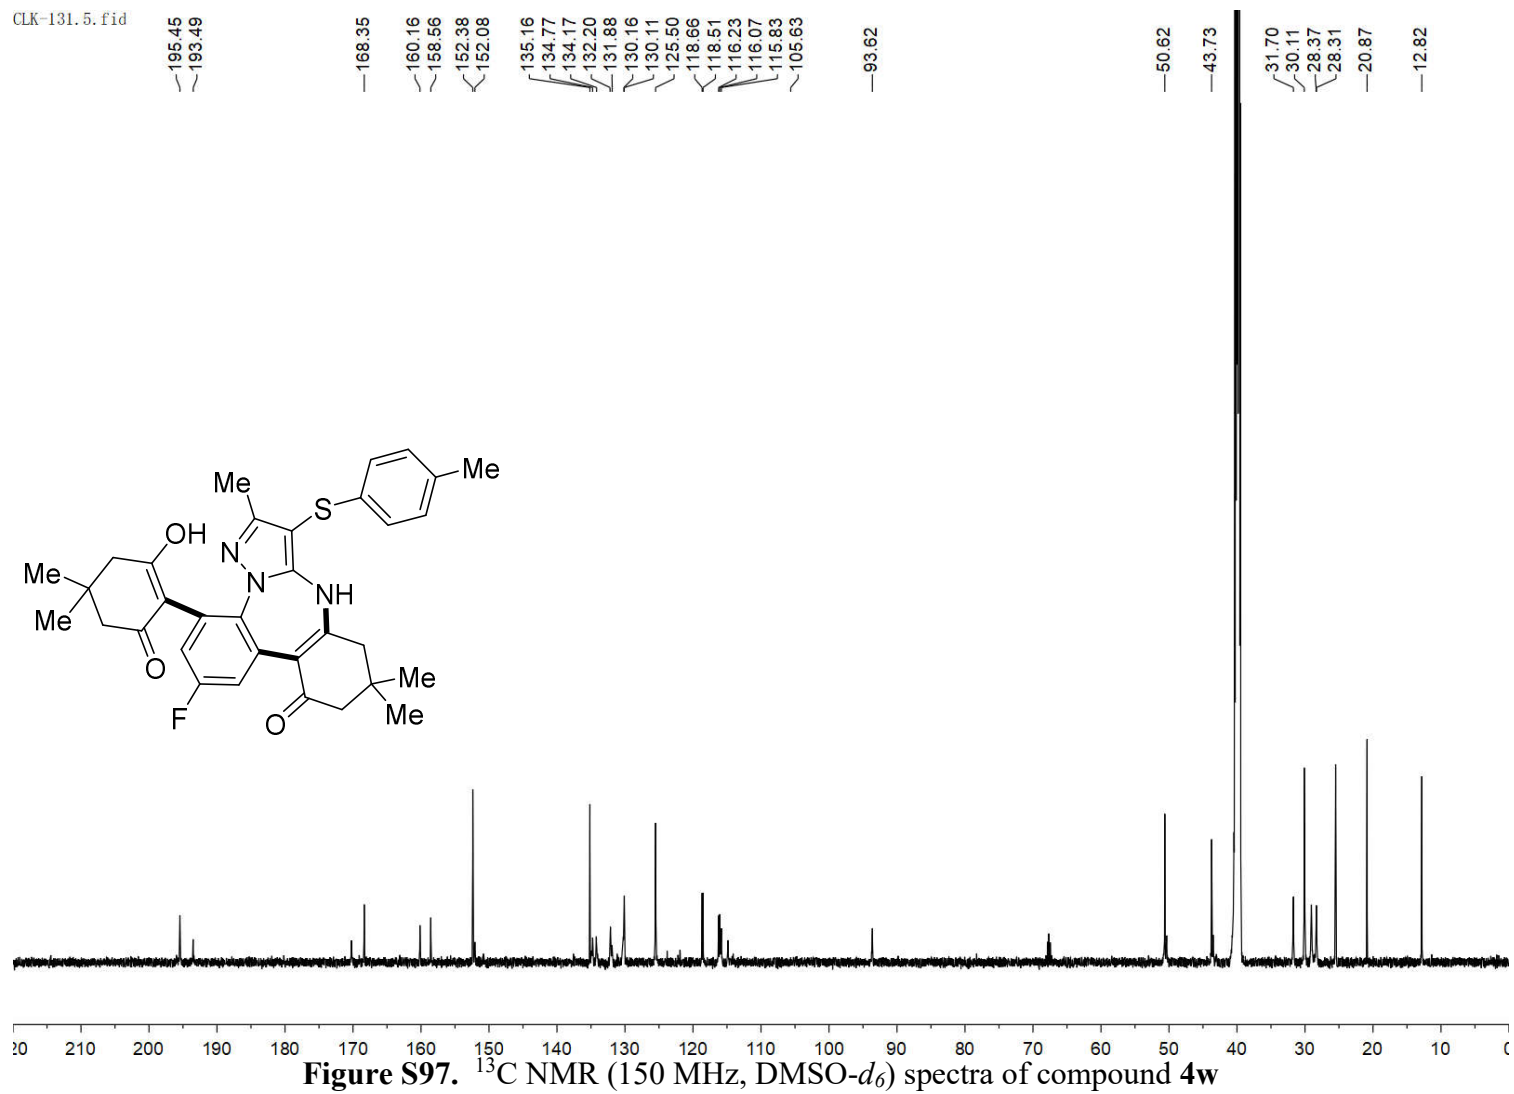

Figure S97.  $^{13}\text{C}$  NMR (150 MHz,  $\text{DMSO-}d_6$ ) spectra of compound 4w

CLK-135-1.1.fid

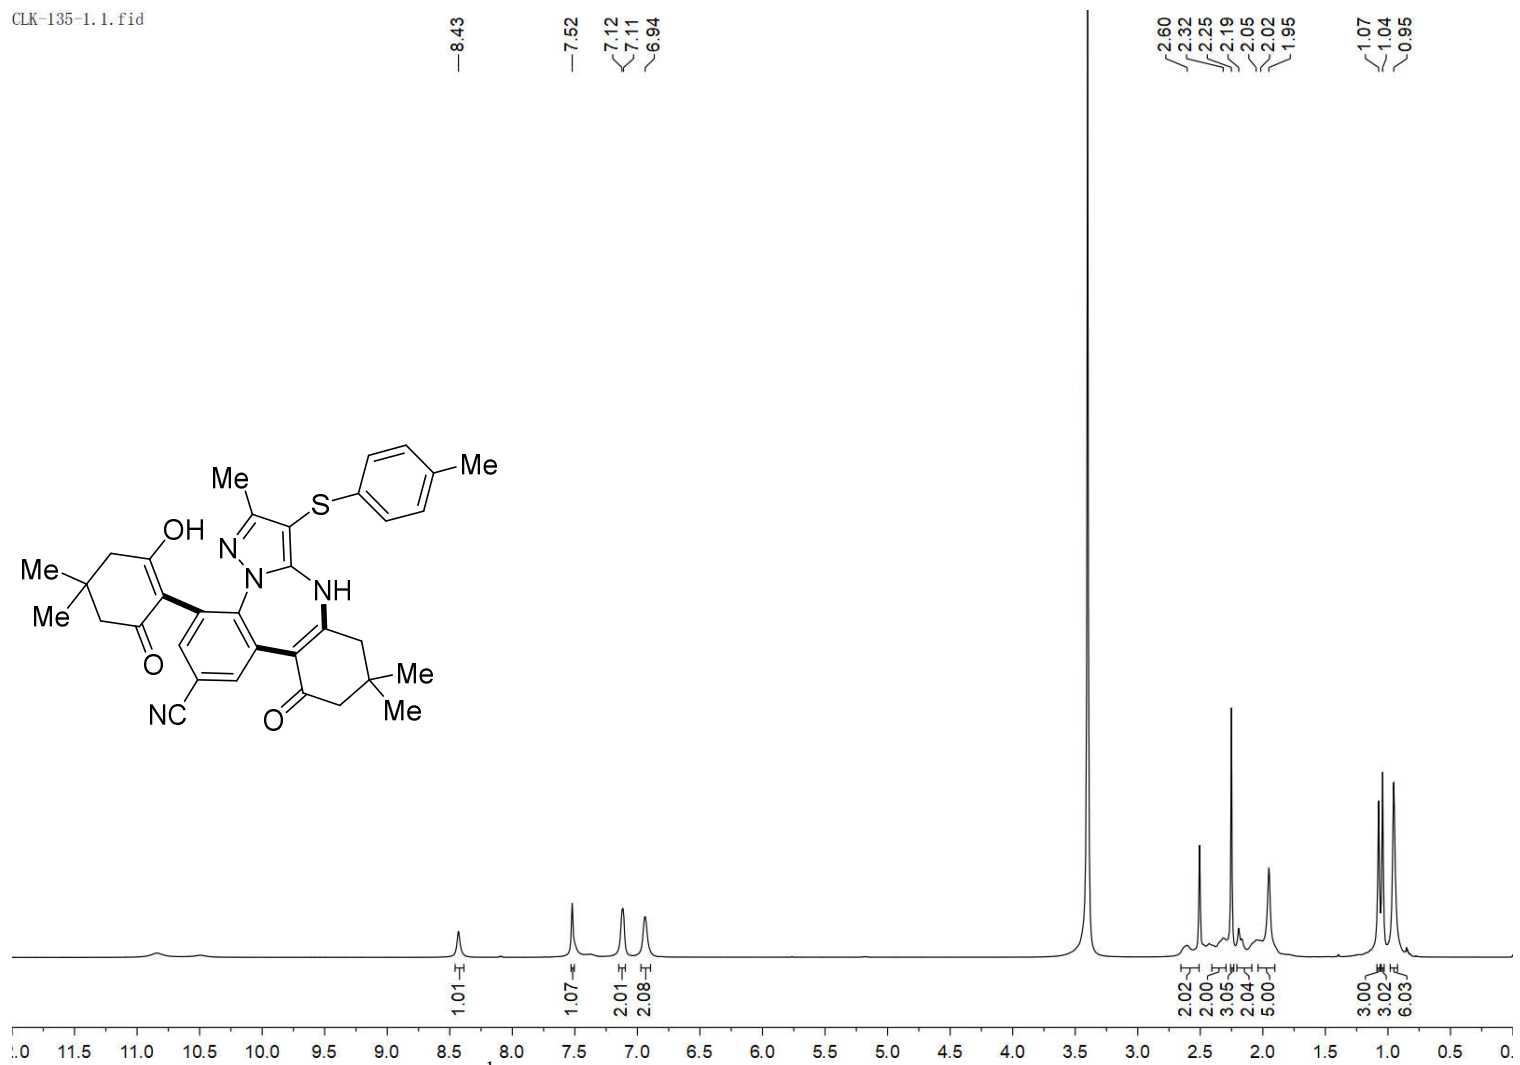

Figure S98. <sup>1</sup>H NMR (600 MHz, DMSO-*d*<sub>6</sub>) spectra of compound 4x

CLK-135.1.fid

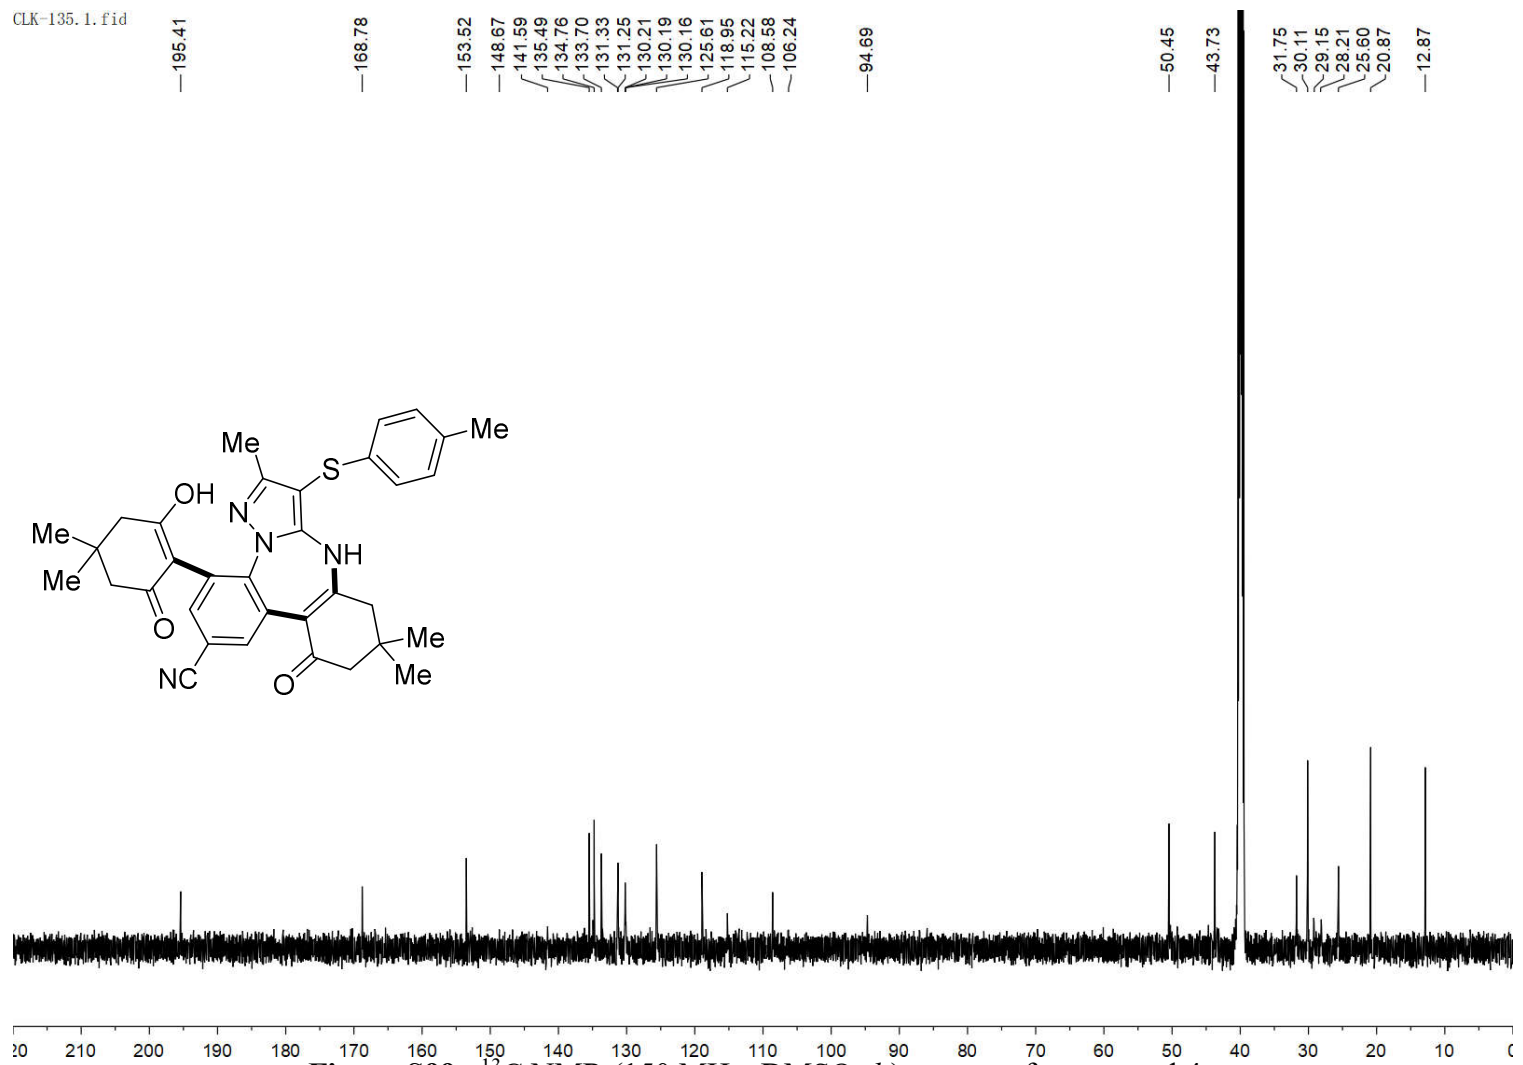

Figure S99. <sup>13</sup>C NMR (150 MHz, DMSO-*d*<sub>6</sub>) spectra of compound 4x

CLK-124.1.fid

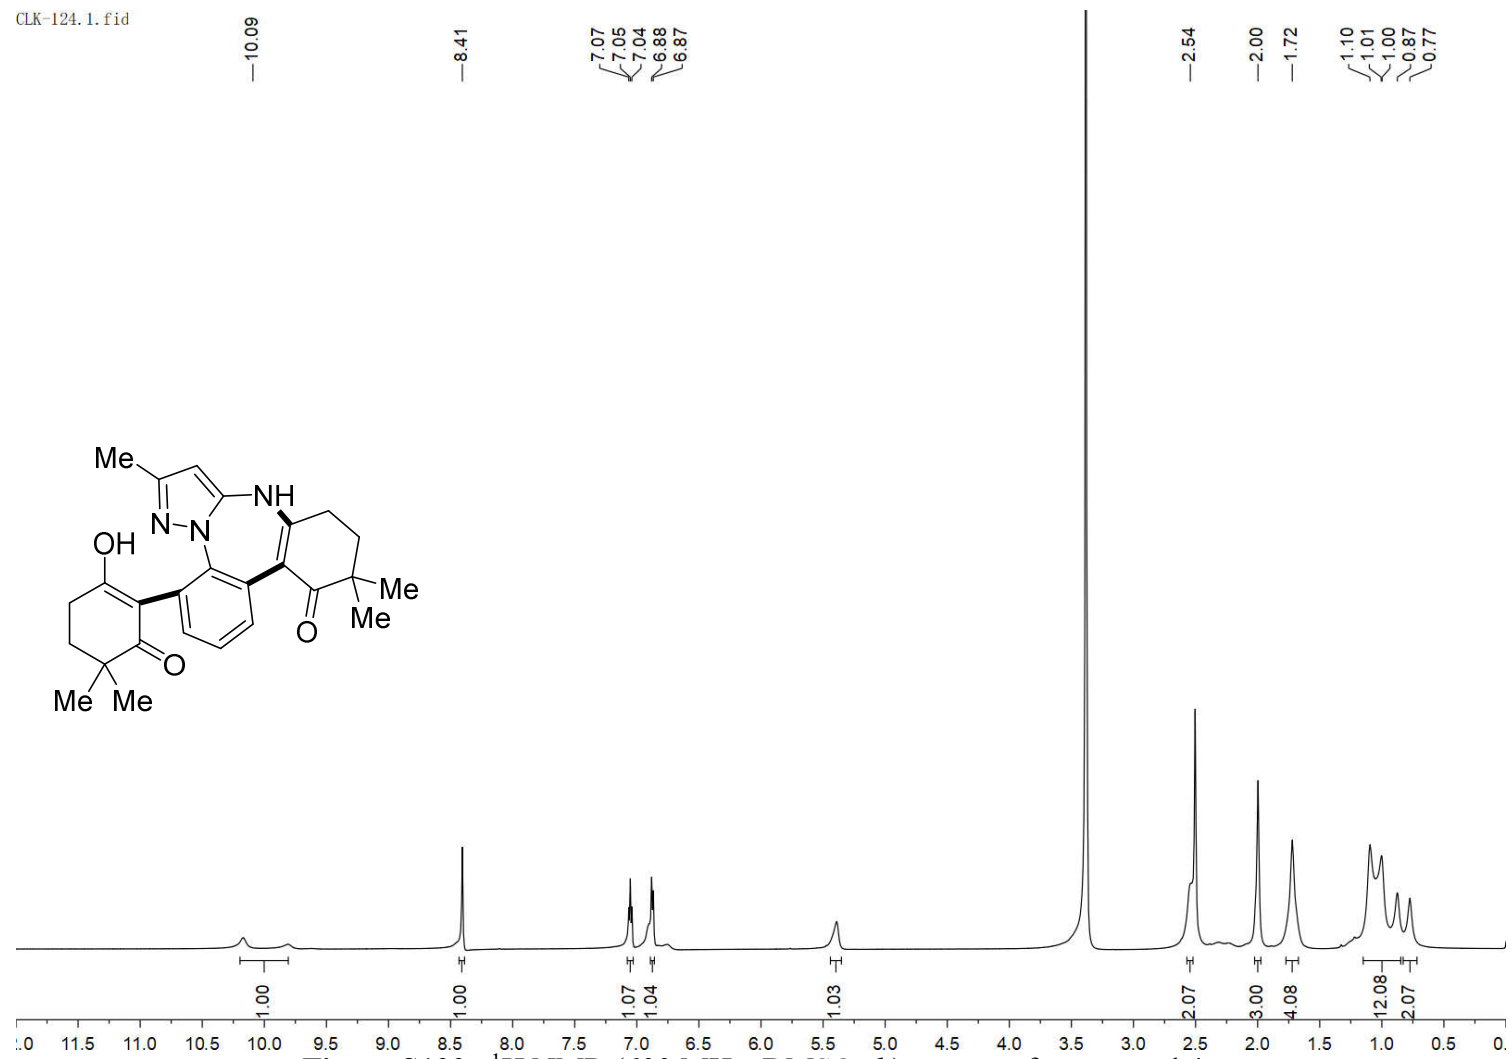

Figure S100. <sup>1</sup>H NMR (600 MHz, DMSO-*d*<sub>6</sub>) spectra of compound 4y

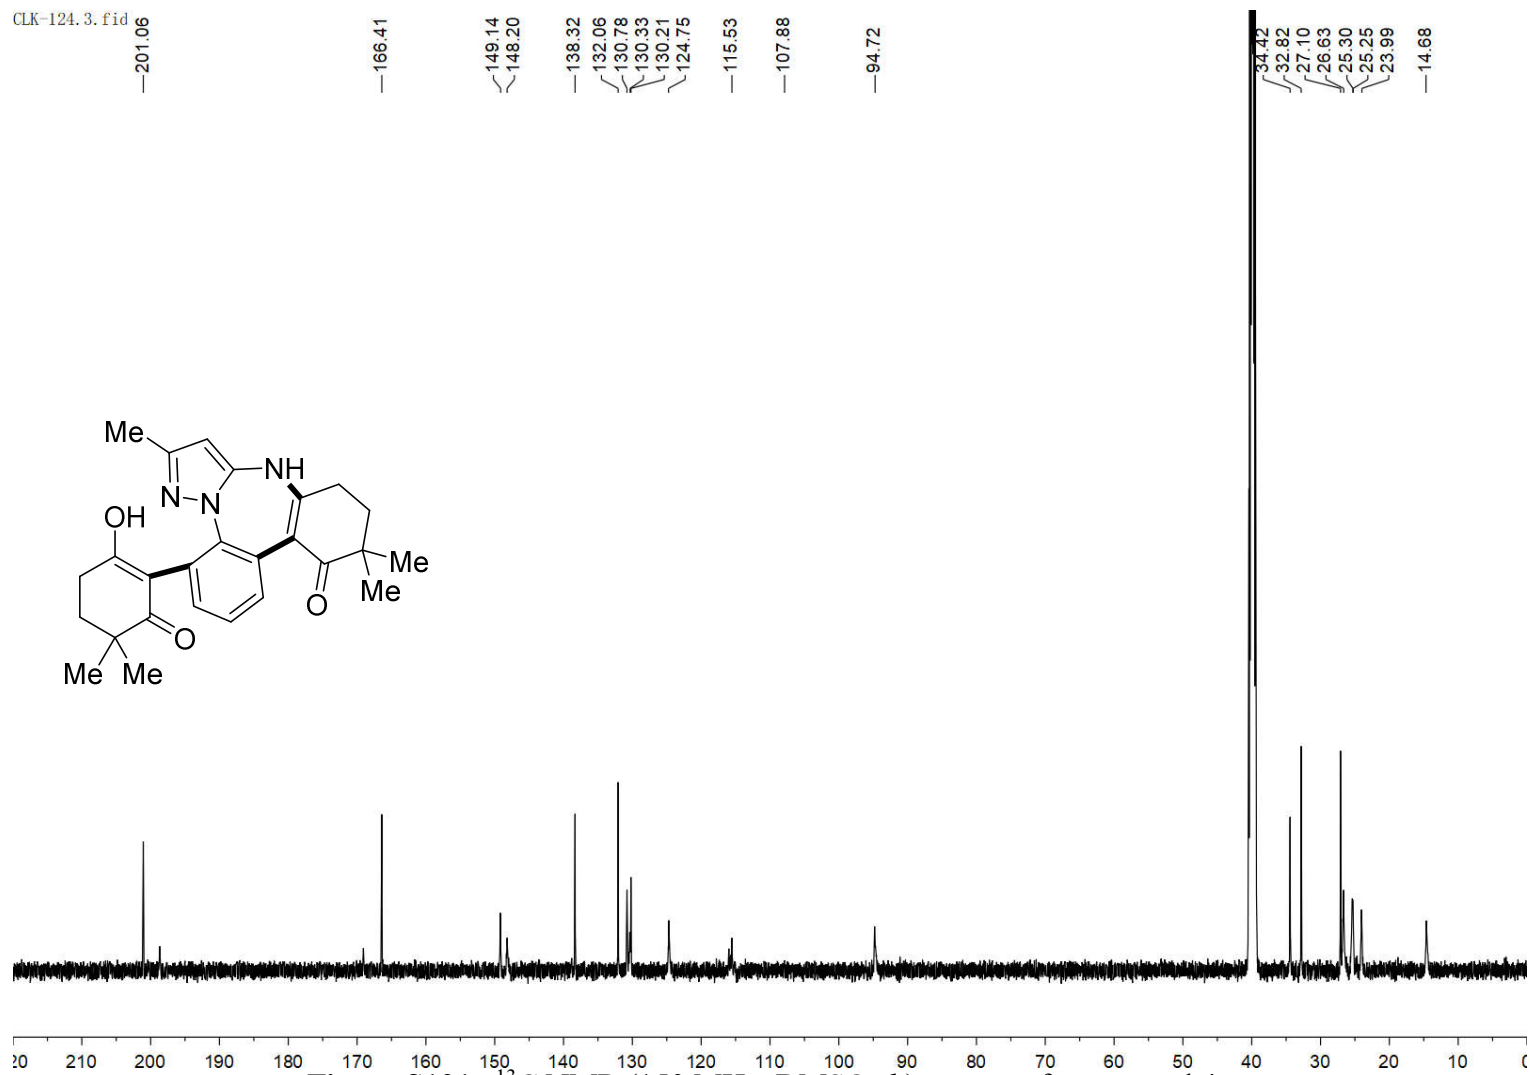

Figure S101.  $^{13}\text{C}$  NMR (150 MHz,  $\text{DMSO-}d_6$ ) spectra of compound 4y

CLK-125.1.fid

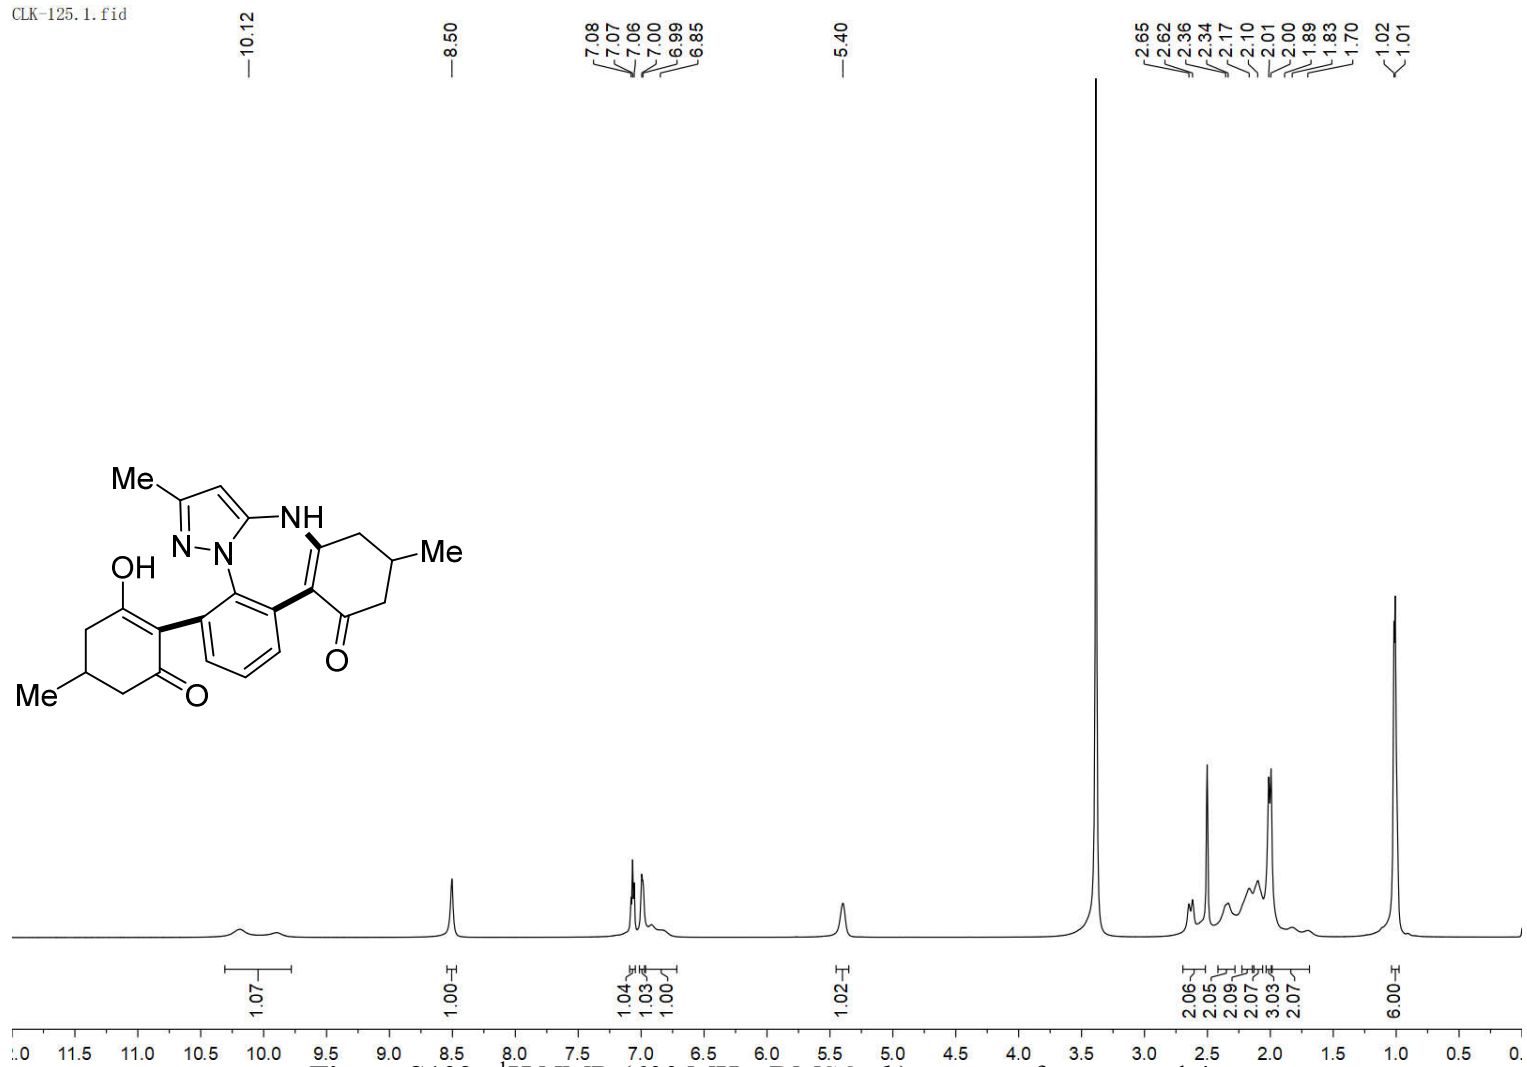

Figure S102. <sup>1</sup>H NMR (600 MHz, DMSO-*d*<sub>6</sub>) spectra of compound 4z

CLK-125.3.fid

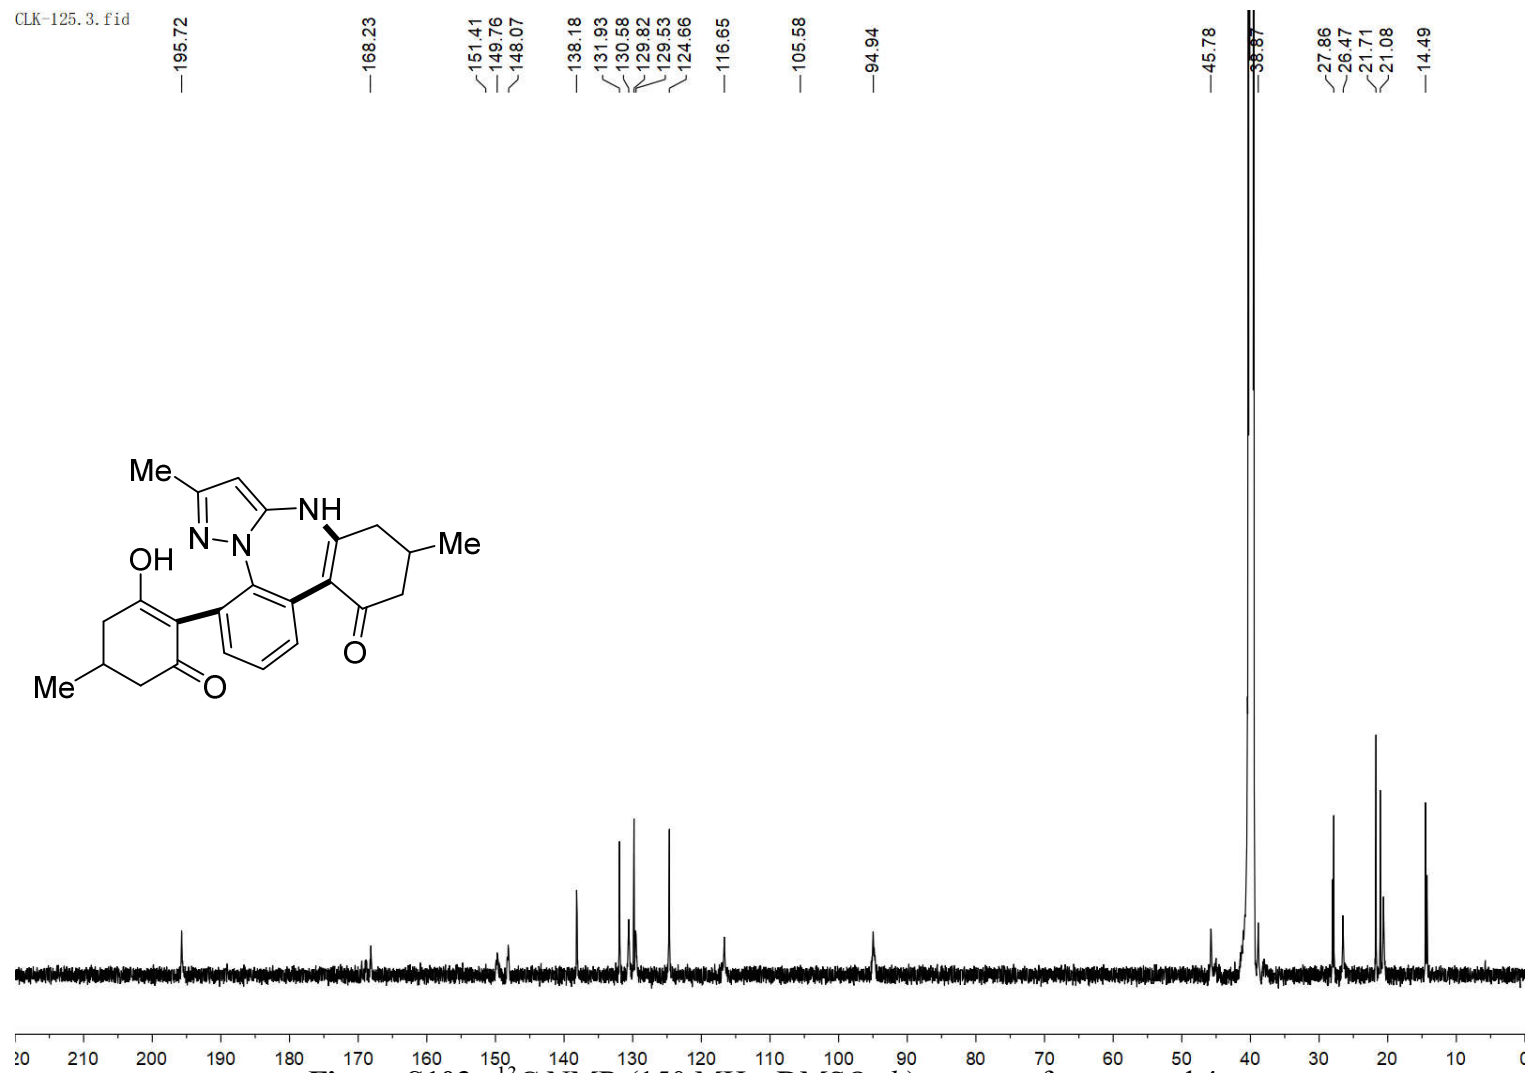

Figure S103.  $^{13}\text{C}$  NMR (150 MHz,  $\text{DMSO}-d_6$ ) spectra of compound 4z



CLK-126.1.fid

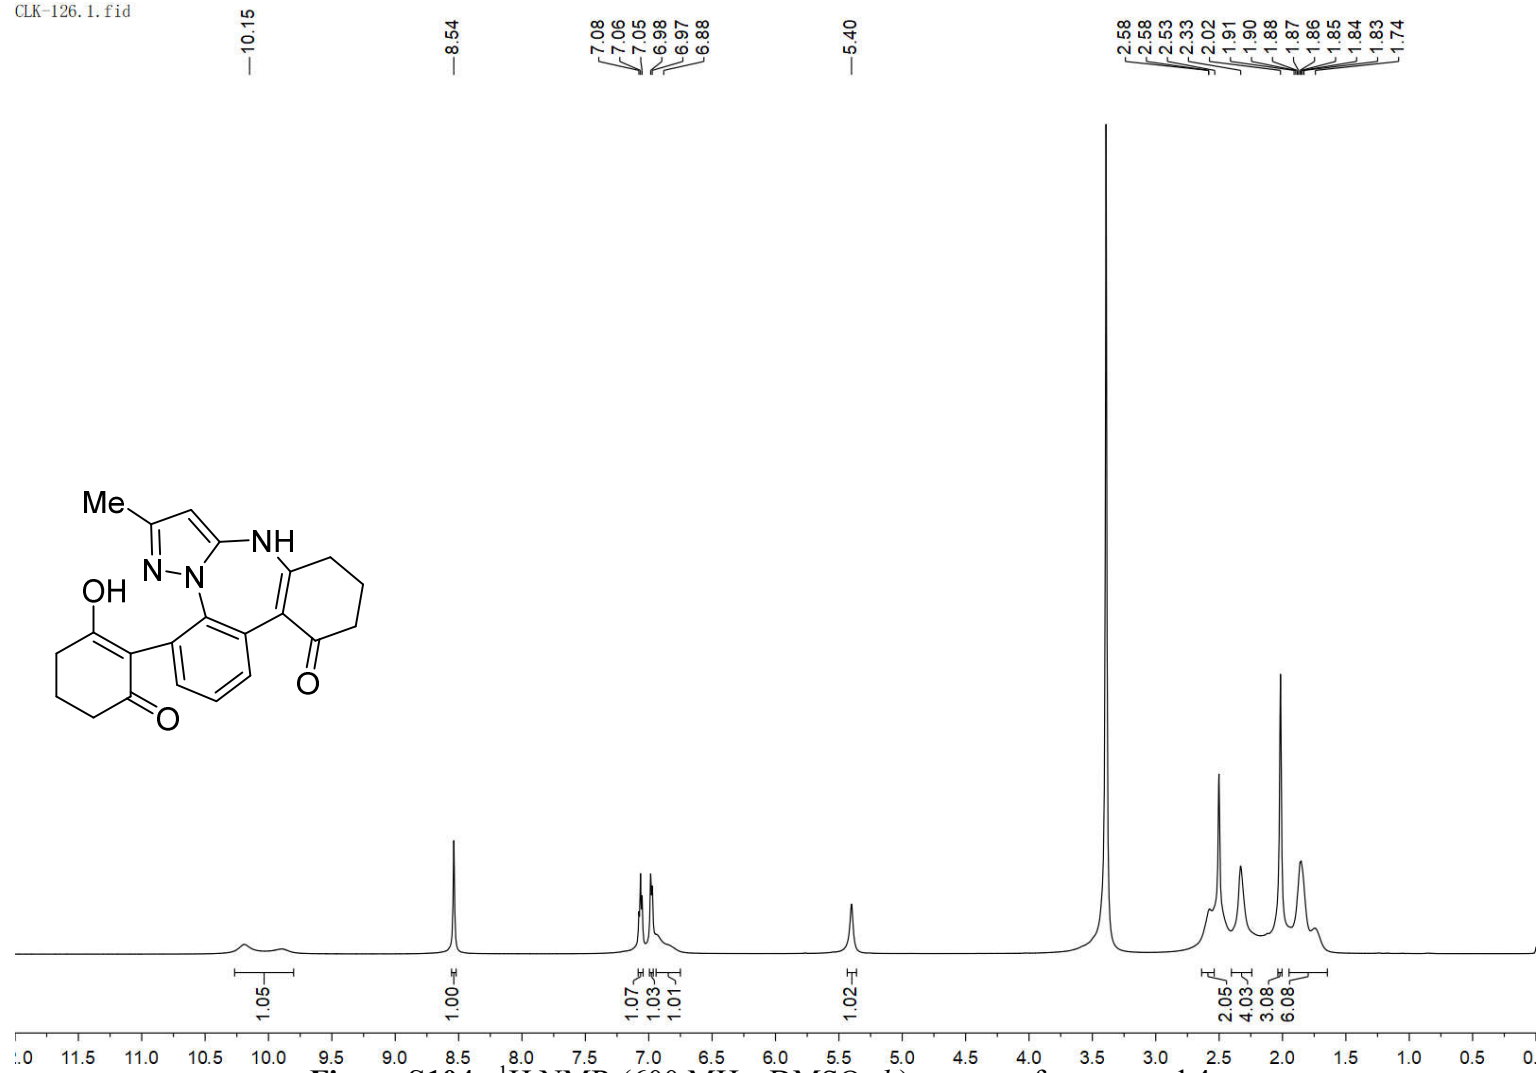

Figure S104.  $^1\text{H}$  NMR (600 MHz,  $\text{DMSO-}d_6$ ) spectra of compound **4aa**

CLK-126.2.fid

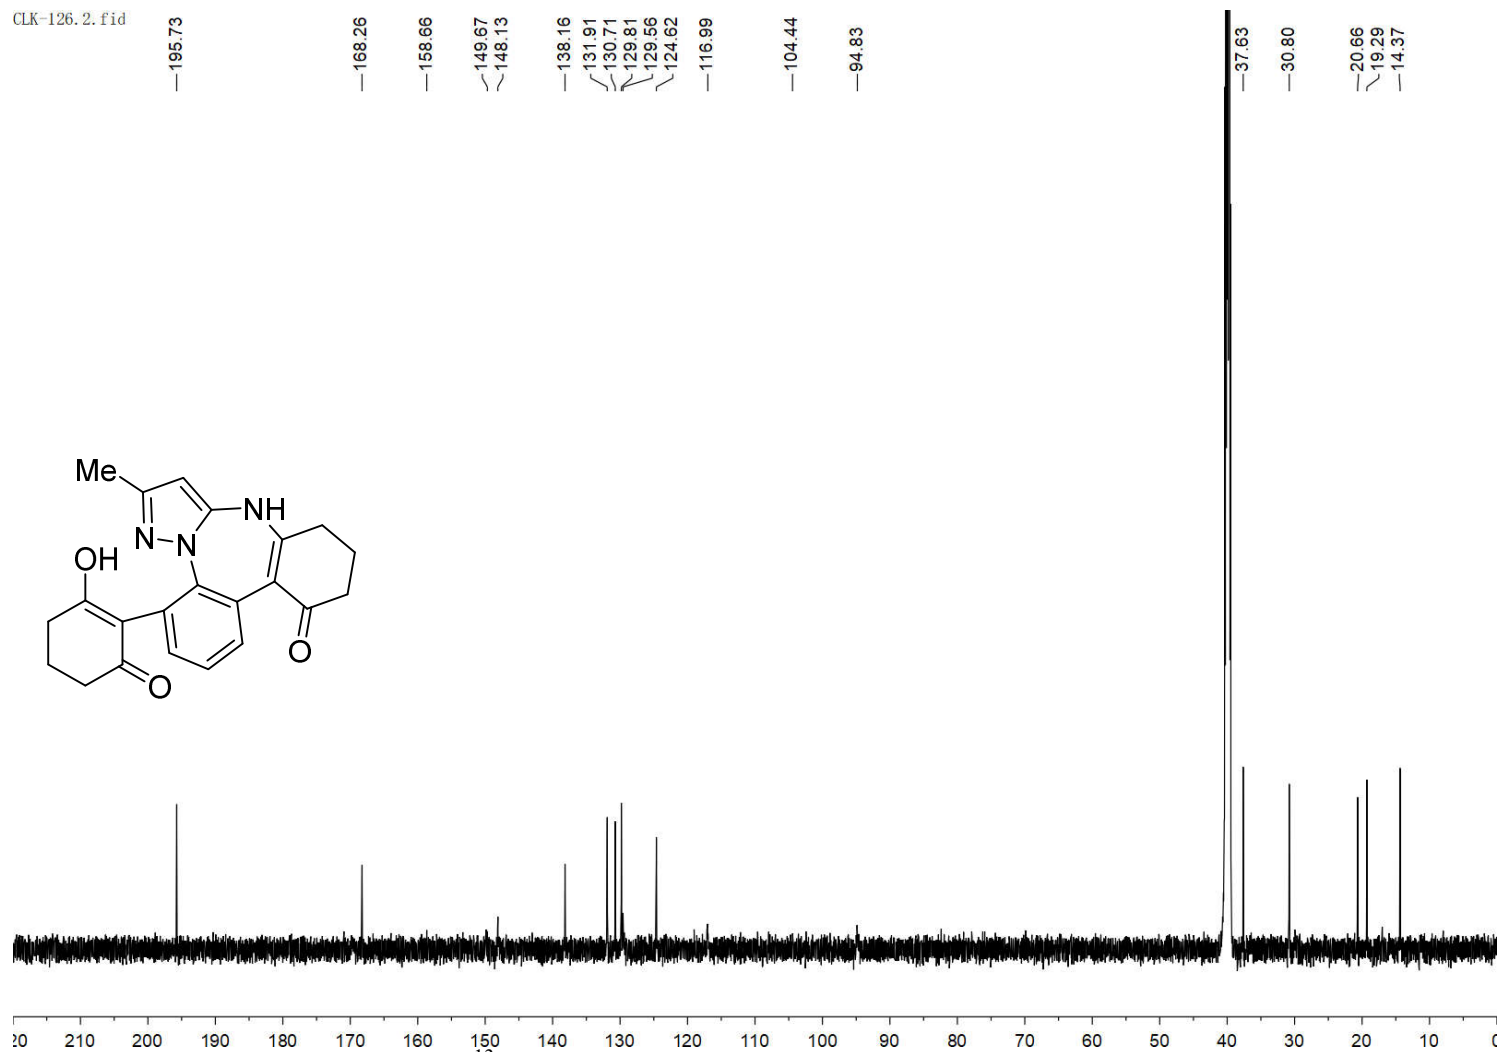

Figure S105.  $^{13}\text{C}$  NMR (150 MHz,  $\text{DMSO-}d_6$ ) spectra of compound 4aa

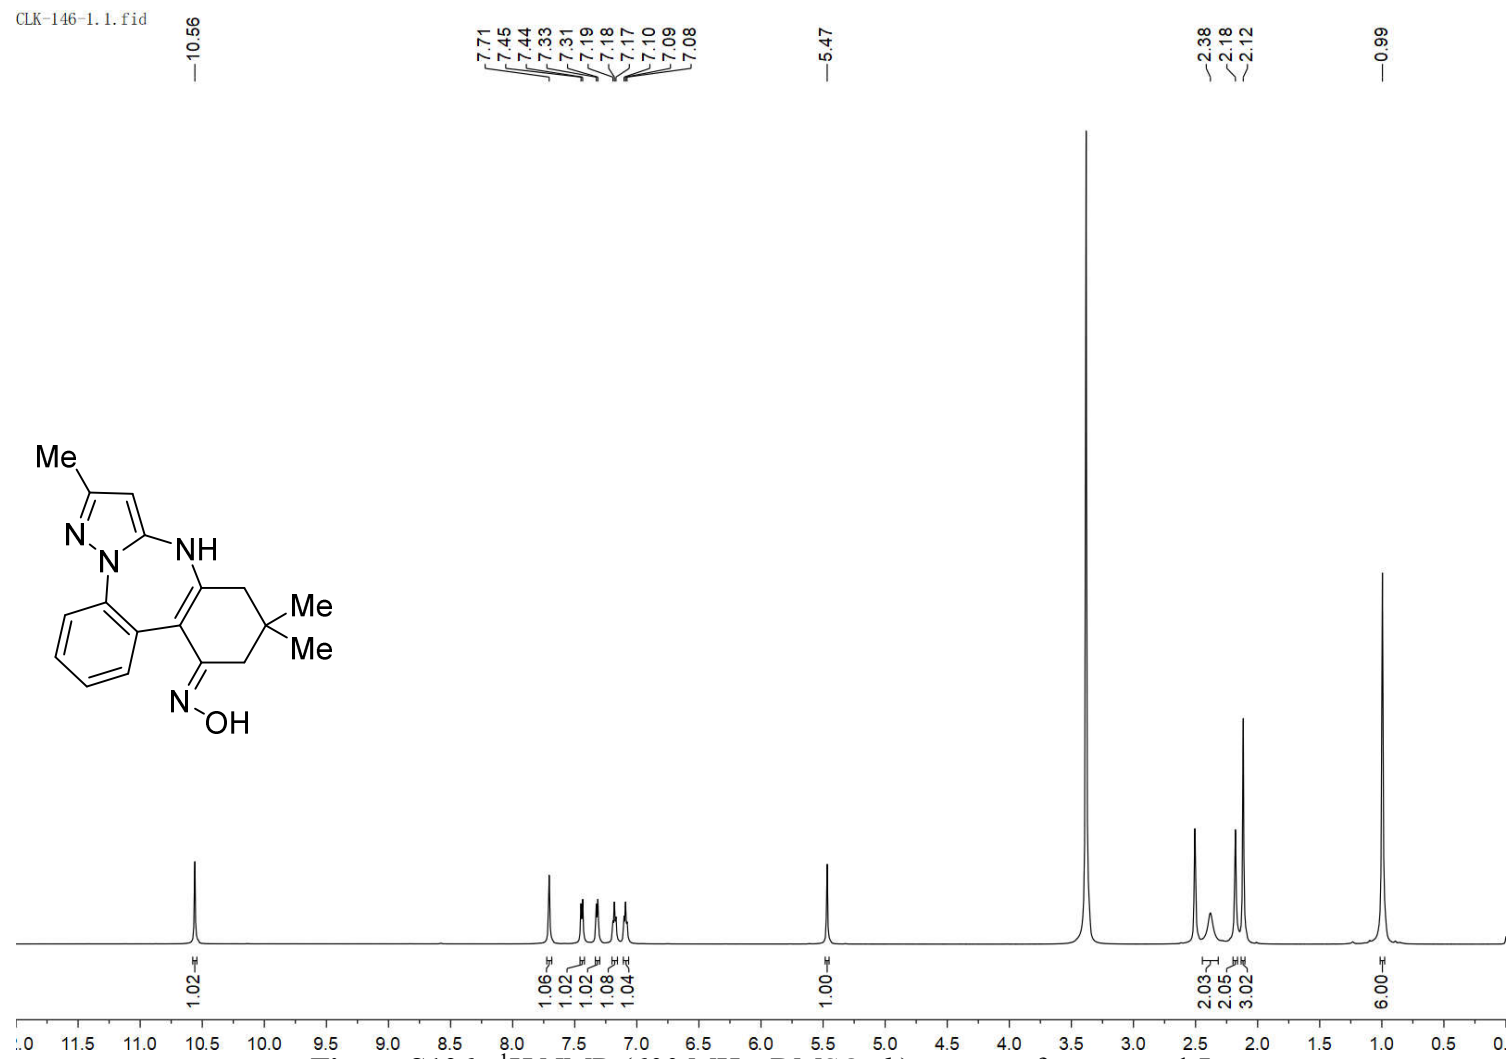

Figure S106. <sup>1</sup>H NMR (600 MHz, DMSO-*d*<sub>6</sub>) spectra of compound 5

CLK-146-1.3.fid

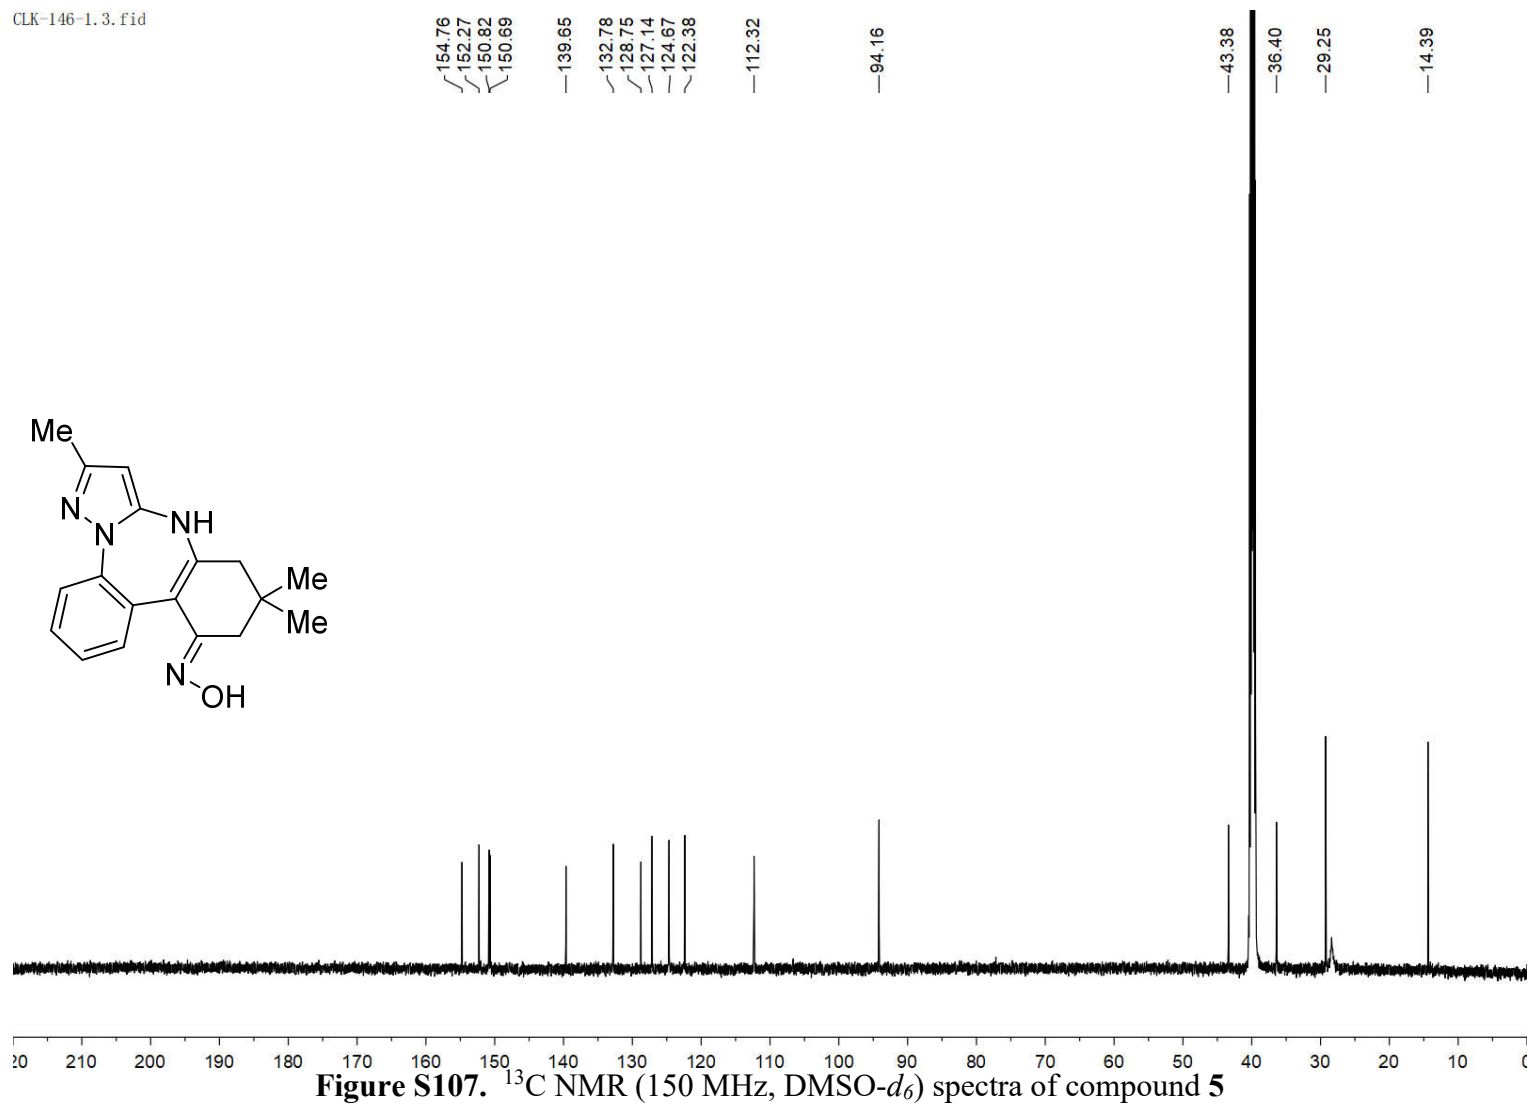

Figure S107.  $^{13}\text{C}$  NMR (150 MHz,  $\text{DMSO-}d_6$ ) spectra of compound 5

CLK-148. 1.fid

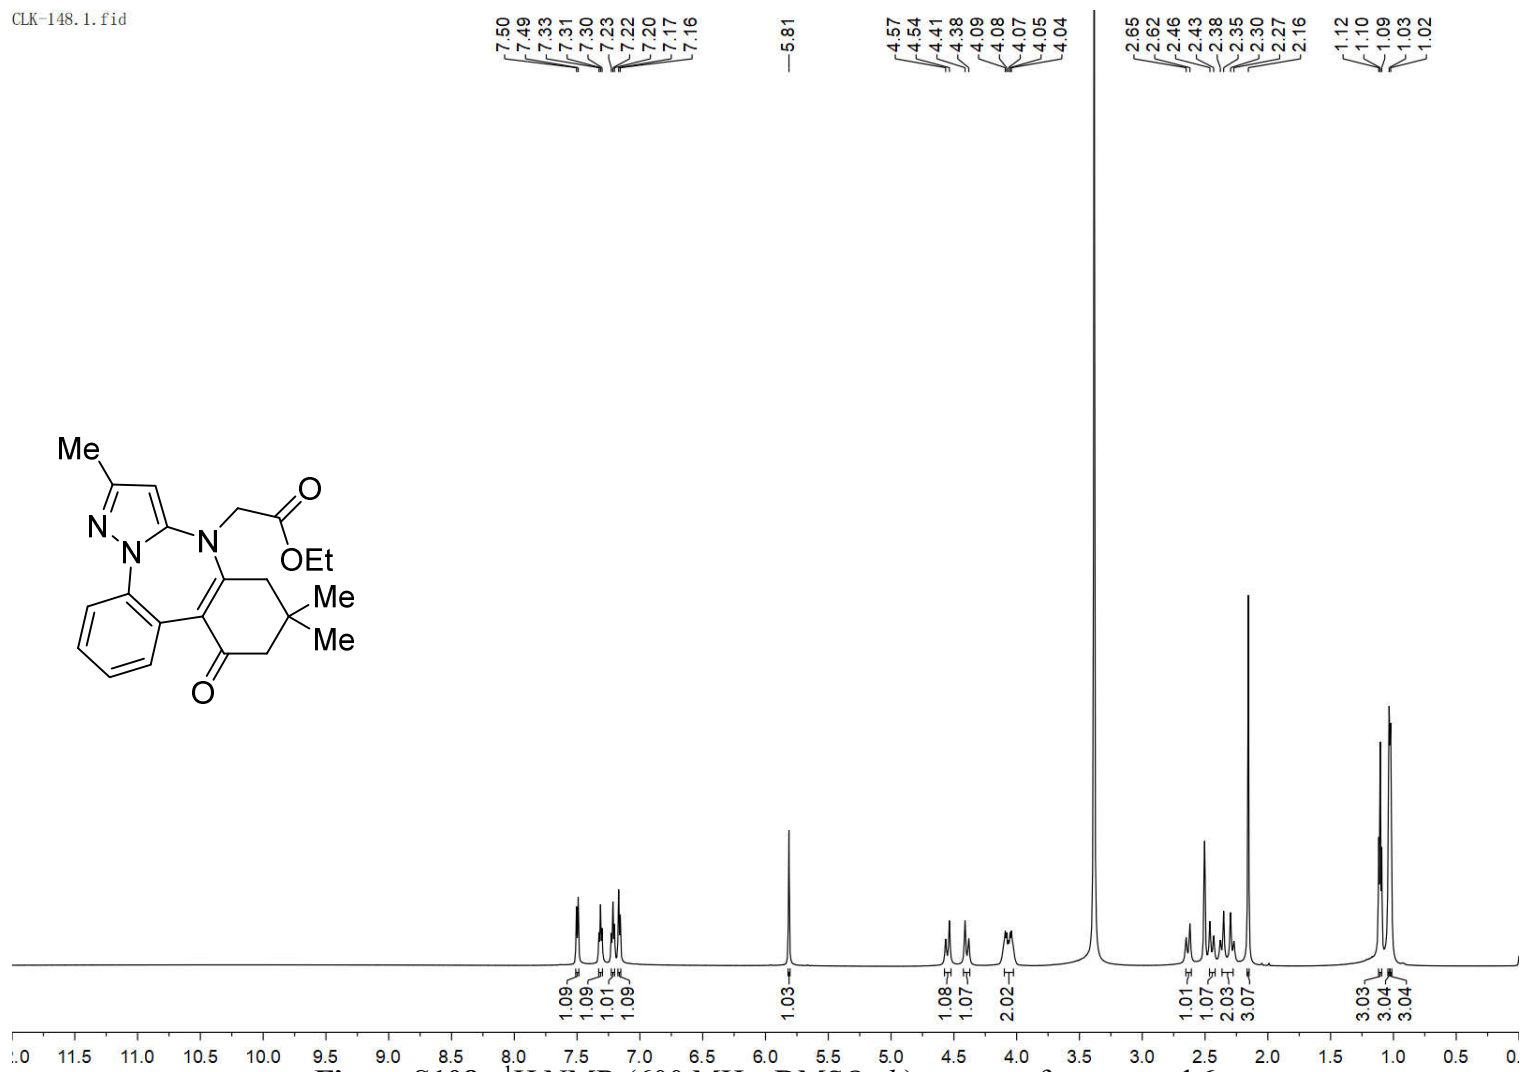

Figure S108. <sup>1</sup>H NMR (600 MHz, DMSO-*d*<sub>6</sub>) spectra of compound 6

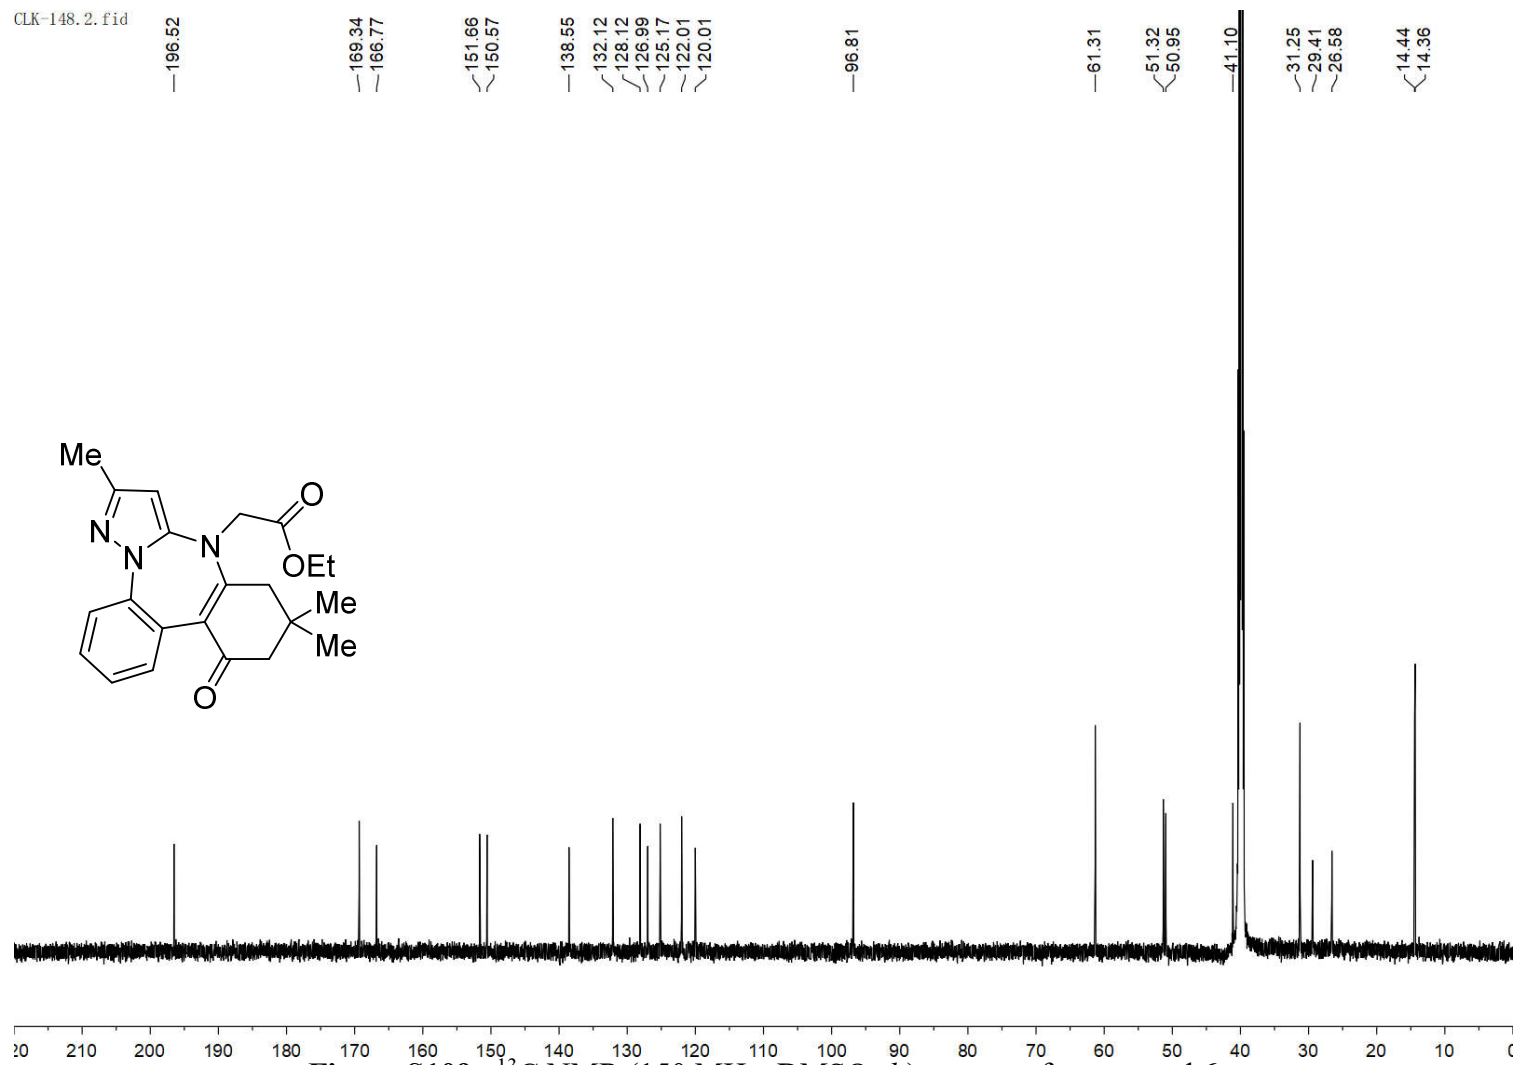

Figure S109. <sup>13</sup>C NMR (150 MHz, DMSO-*d*<sub>6</sub>) spectra of compound 6

clk-149.1.fid

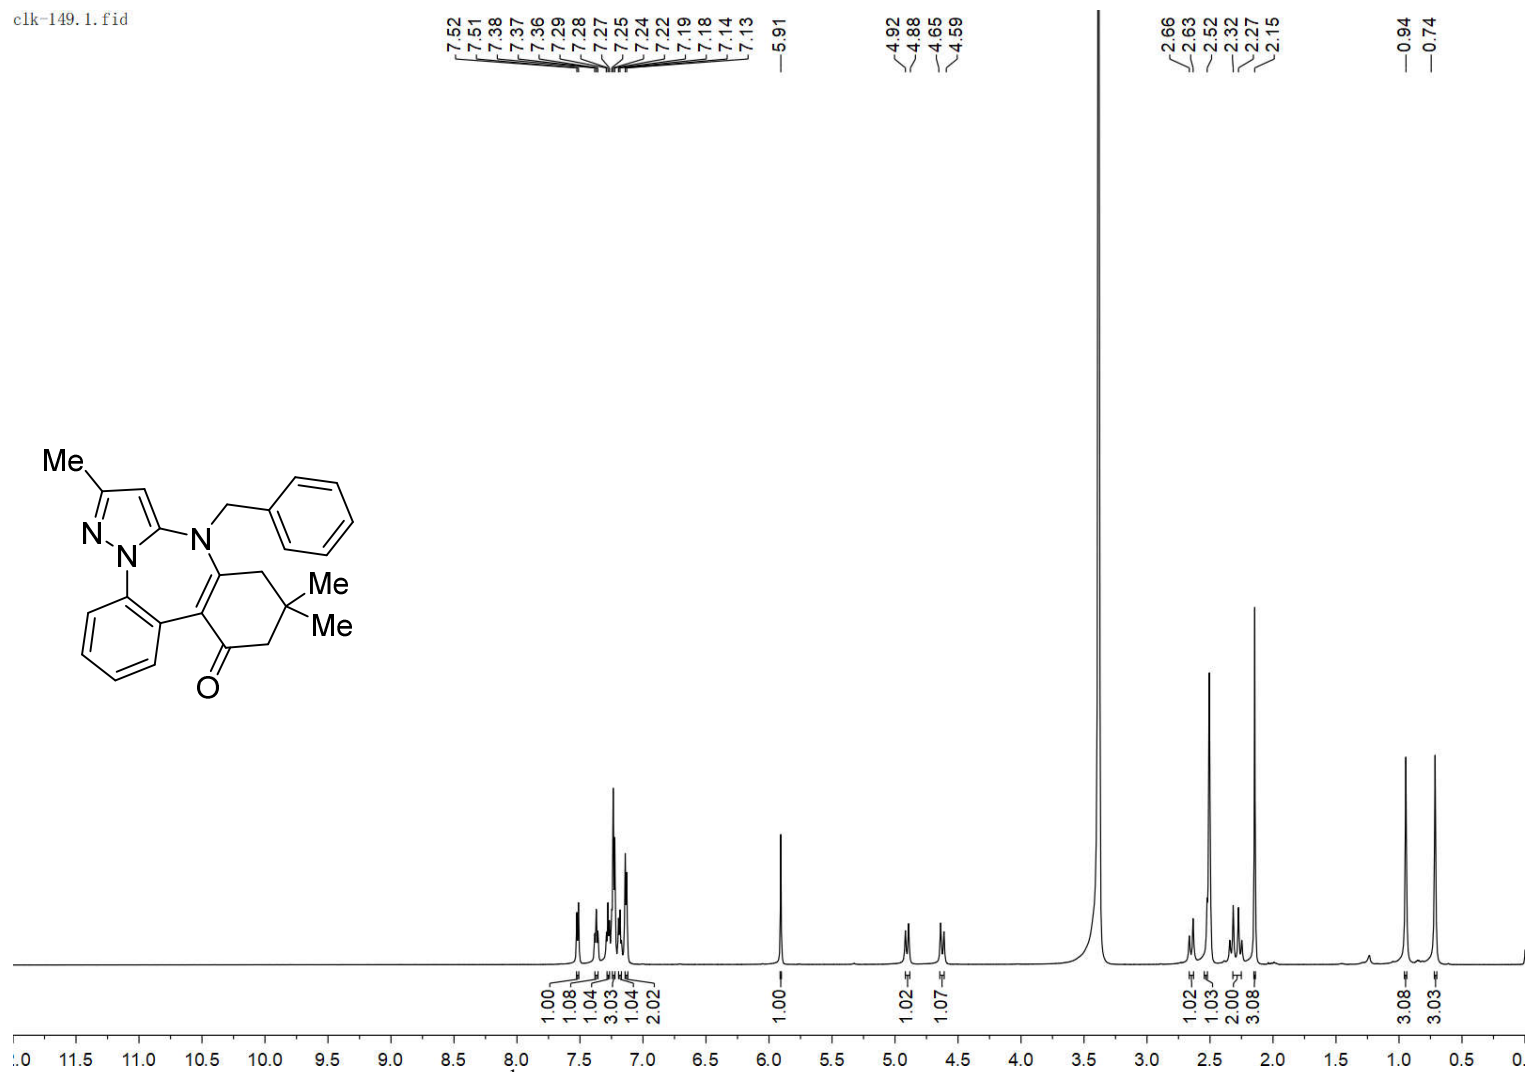

Figure S110. <sup>1</sup>H NMR (600 MHz, DMSO-*d*<sub>6</sub>) spectra of compound 7

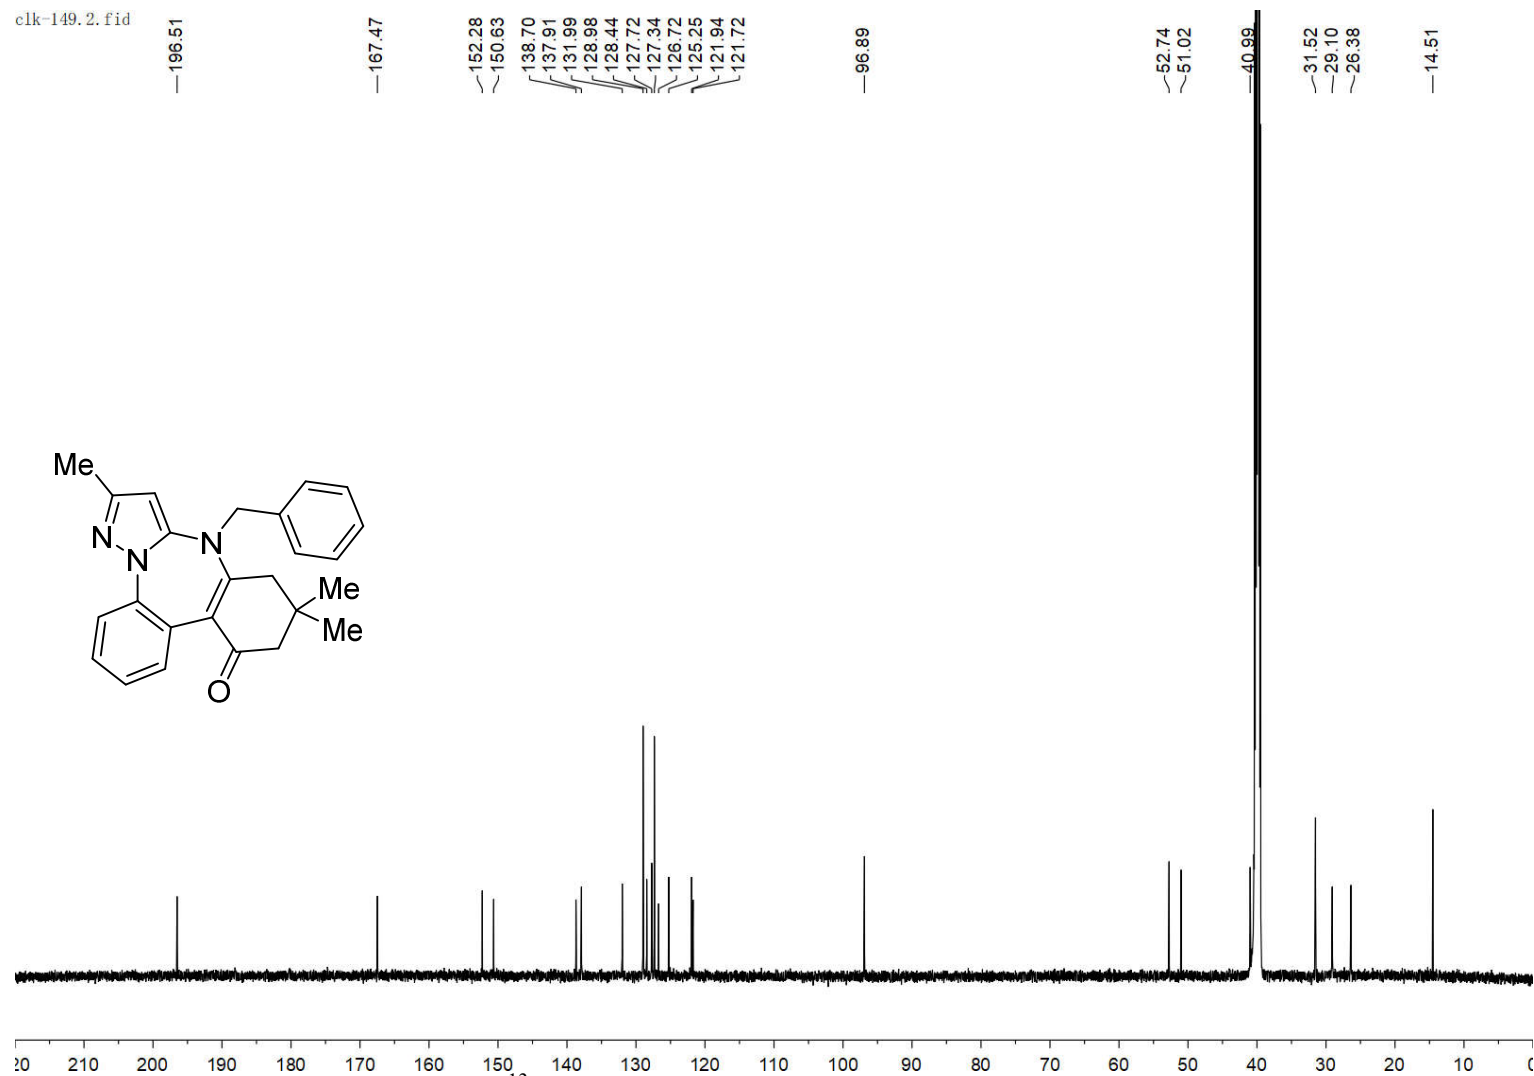

Figure S111.  $^{13}\text{C}$  NMR (150 MHz,  $\text{DMSO}-d_6$ ) spectra of compound 7



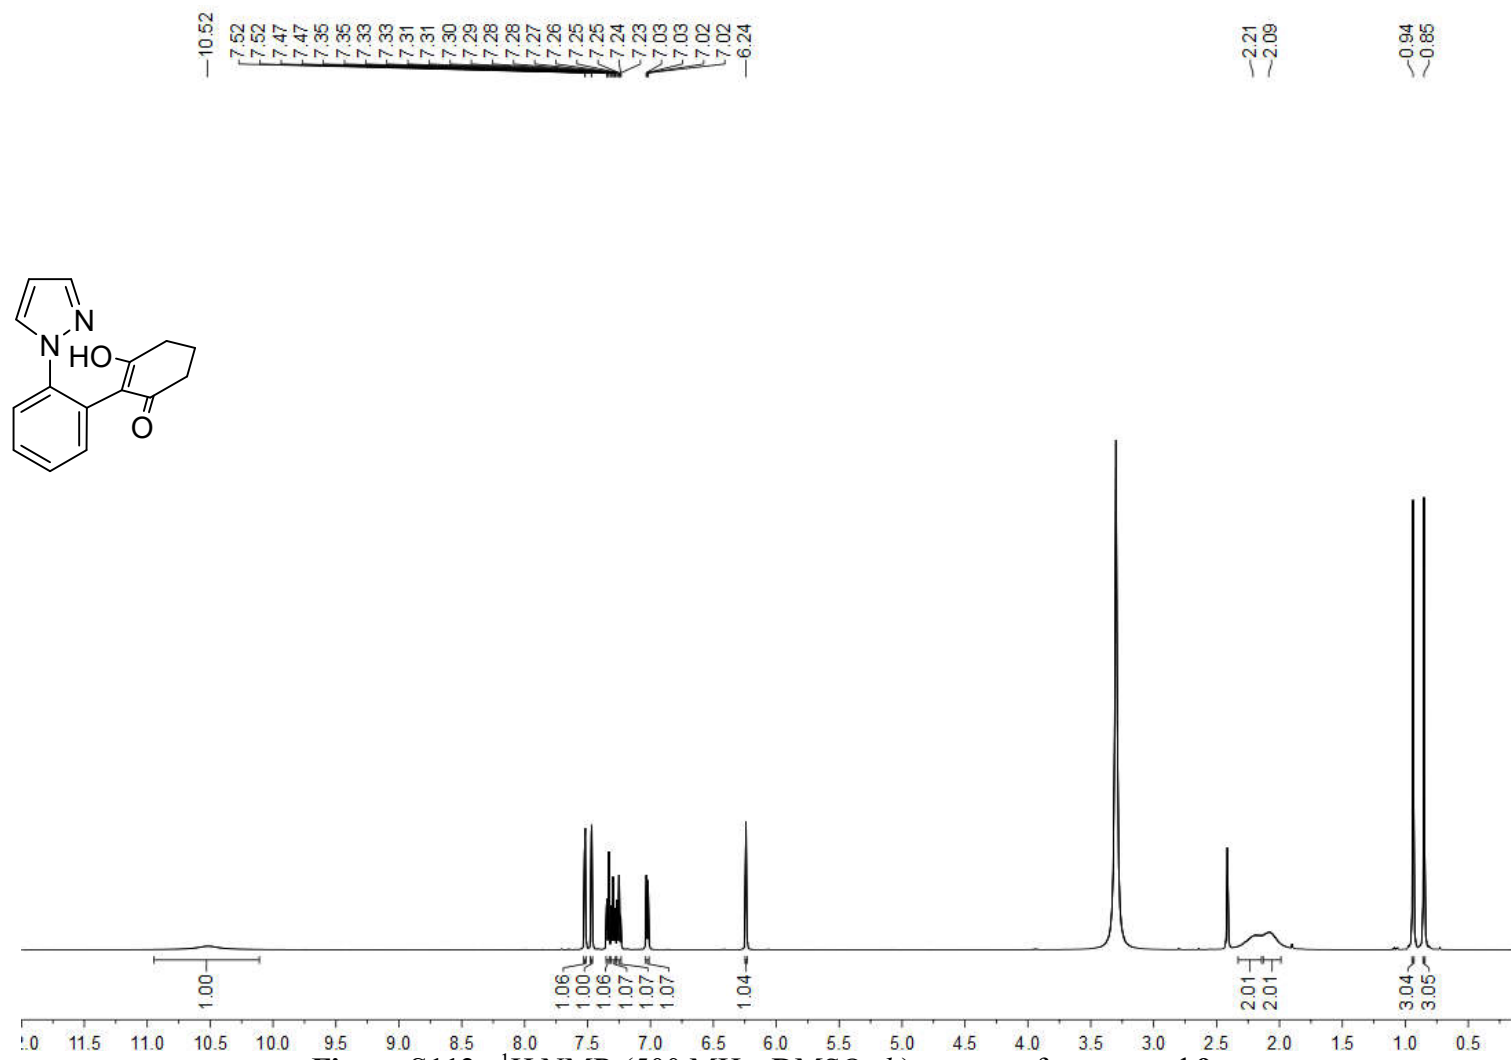

Figure S112. <sup>1</sup>H NMR (500 MHz, DMSO-*d*<sub>6</sub>) spectra of compound 9a

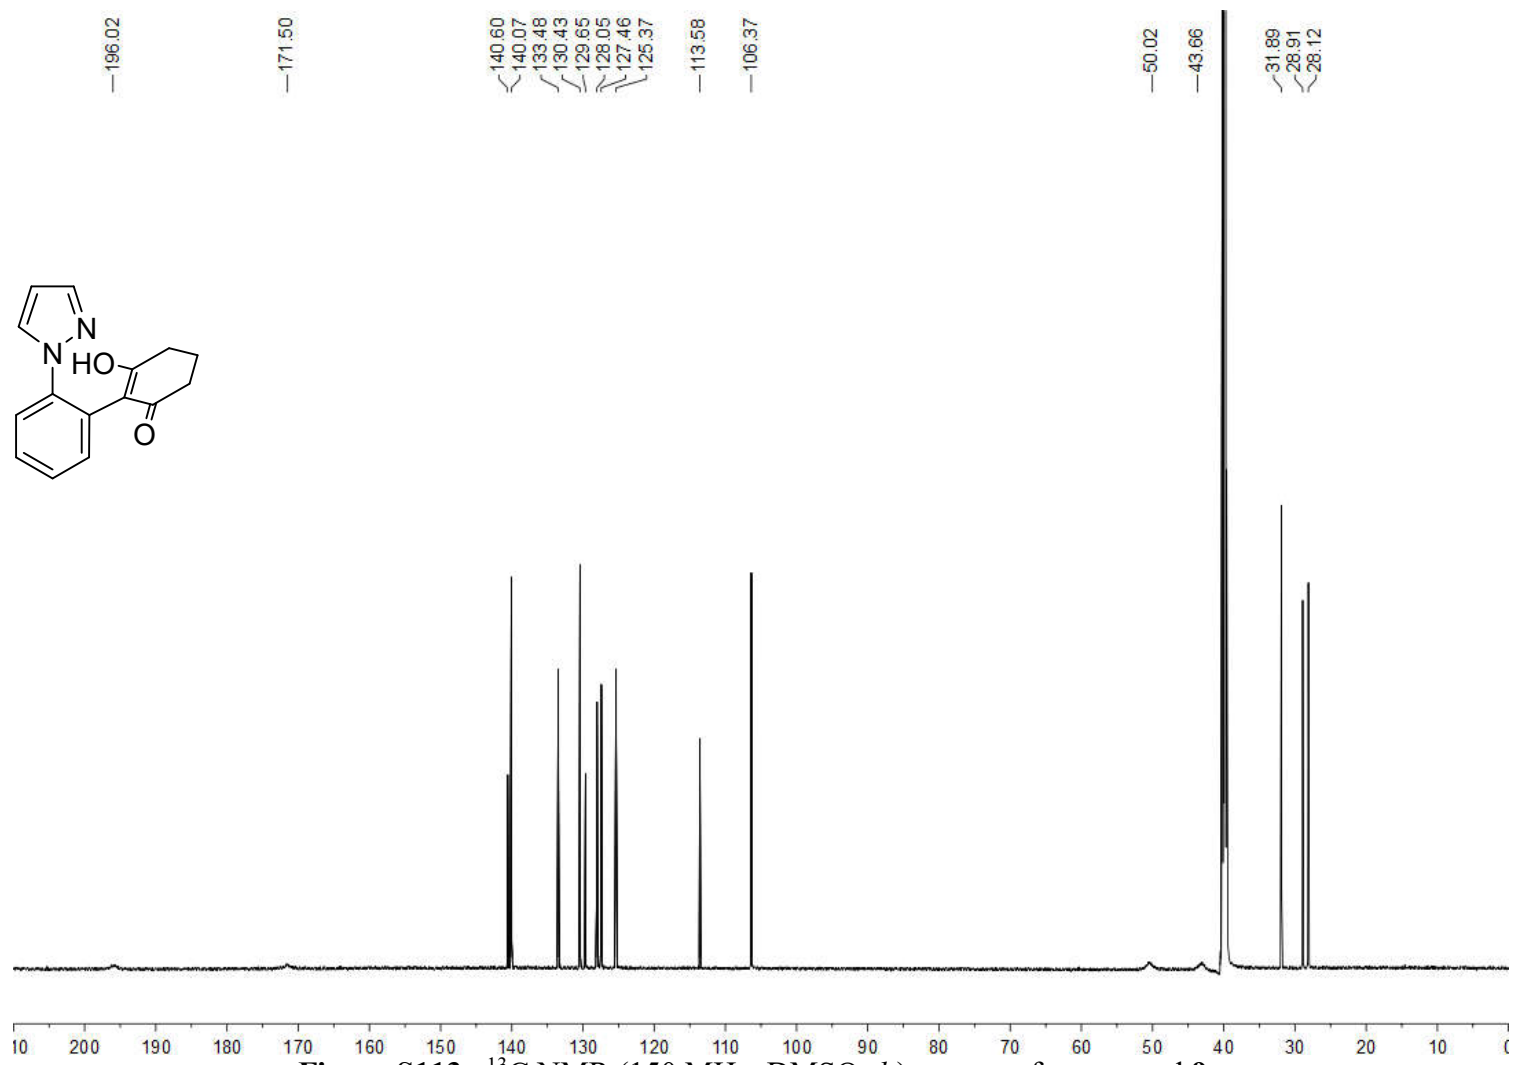

Figure S113. <sup>13</sup>C NMR (150 MHz, DMSO-*d*<sub>6</sub>) spectra of compound 9a

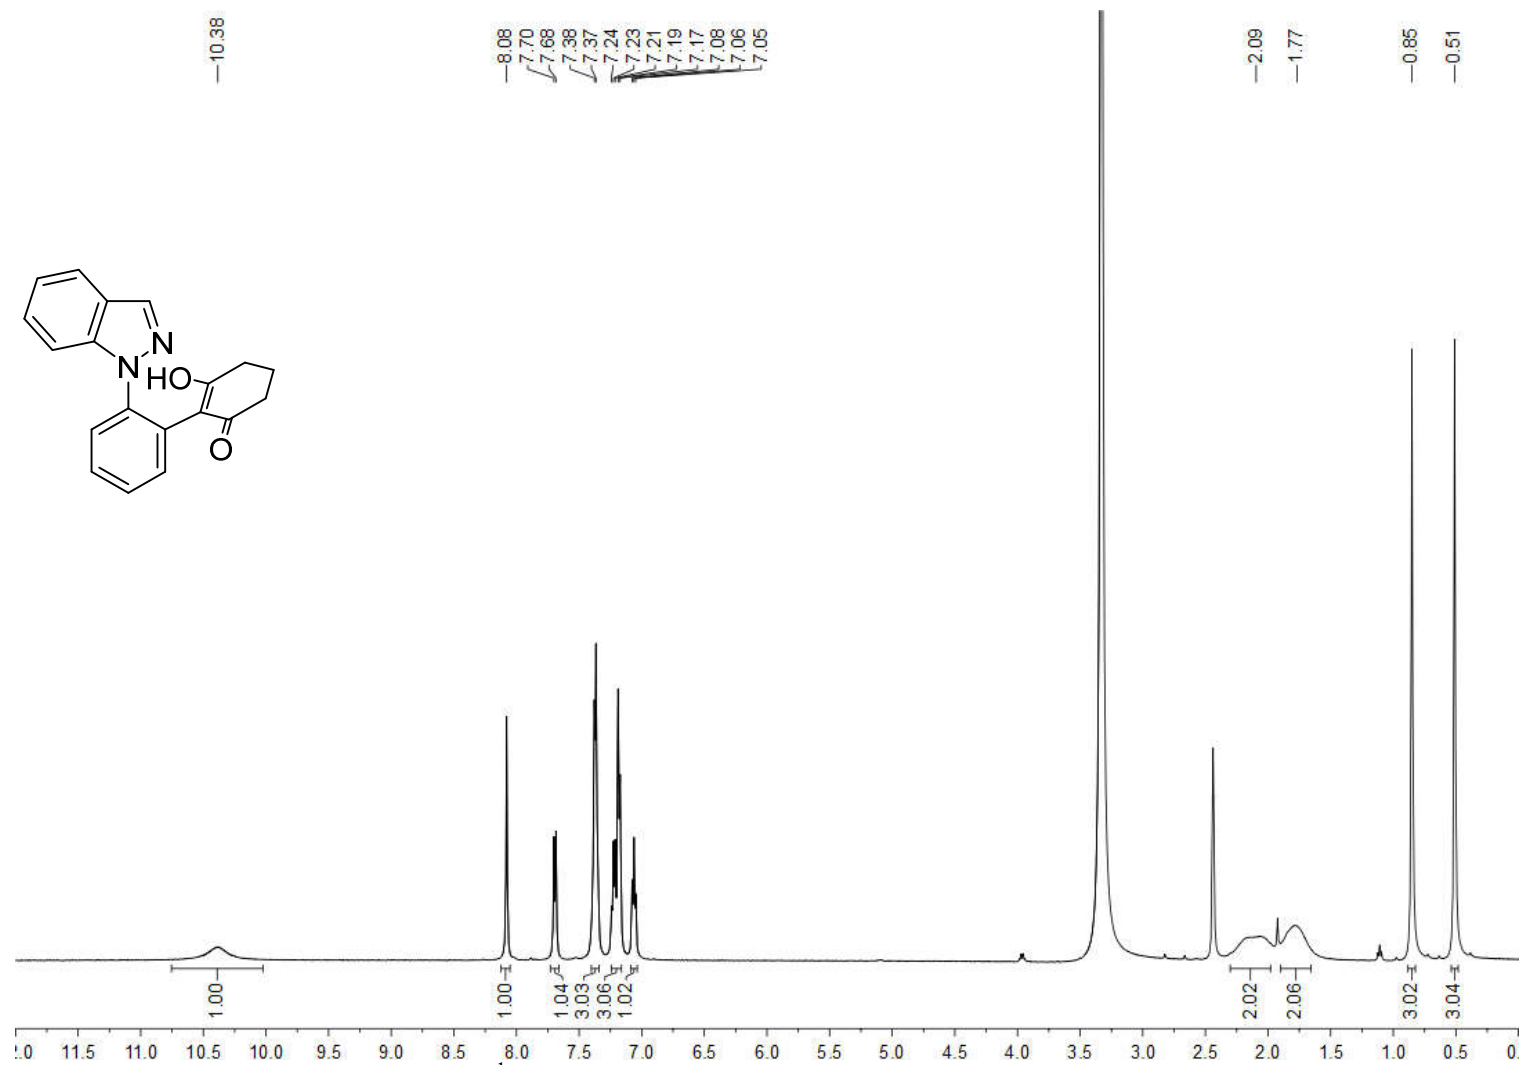

Figure S114. <sup>1</sup>H NMR (500 MHz, DMSO-*d*<sub>6</sub>) spectra of compound **9b**

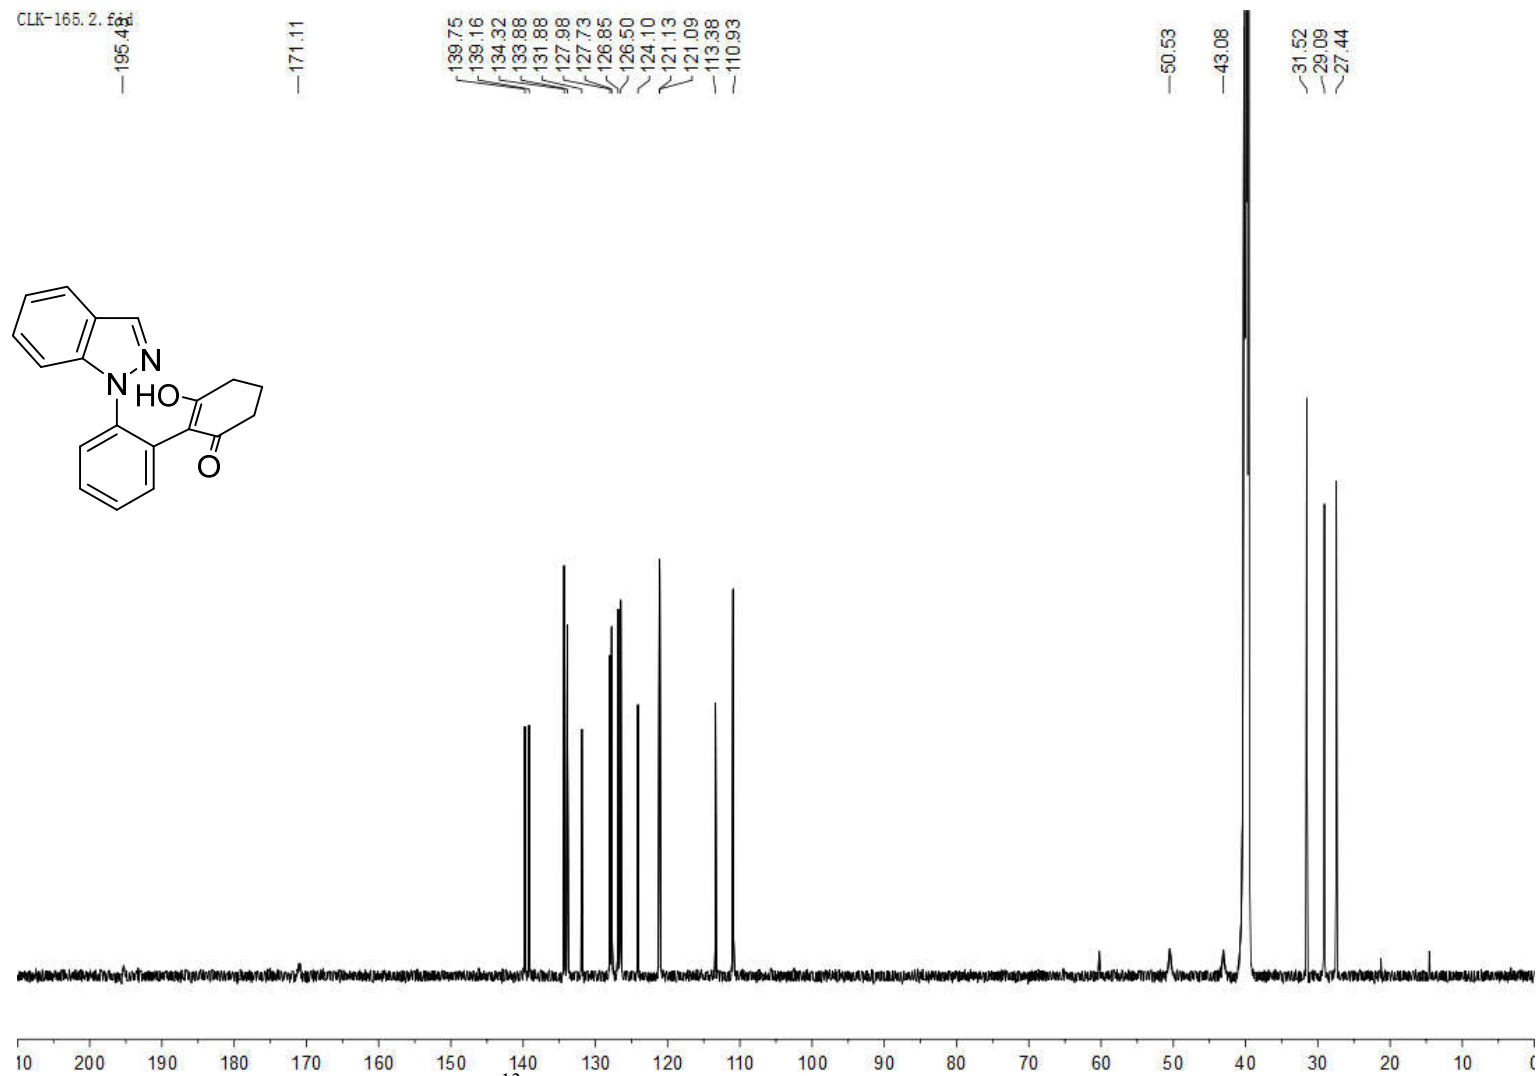

Figure S115.  $^{13}\text{C}$  NMR (150 MHz,  $\text{DMSO}-d_6$ ) spectra of compound **9b**

## 7. References and notes.

1. (a) Rimland, J.; Dunne, A.; Hunjan, S. S.; Sasse, R.; Uings, I.; Montanari, D.; Caivano, M.; Shah, P.; Standing, D.; Gray, D.; Brown, D.; Cairns, W.; Trump, R.; Smith, P. W.; Bertheleme, N.; D'Alessandro, P.; Gul, S.; Vimal, M.; Smith, D. N.; Watson, S. P. *Bioorg. Med. Chem. Lett.*, **2010**, *20*, 2340. (b) Saritha, R.; Annes, S. B.; Perumal, K.; Shankar, B.; Ramesh, S. *J. Org. Chem.*, **2022**, *87*, 13856.
2. (a) Mayakrishnan, S.; Tamizmani, M.; Maheswari, N. U. *Chem. Commun.*, **2020**, *56*, 15462. (b) Yang, L.; Pi, C.; Wu, Y.; Cui, X. *Org. Lett.*, **2022**, *24*, 7502.
3. CCDC 2292416 and 2292417 contain the supplementary crystallographic data for compound **3j** and **4r**. These data can be obtained free of charge from The Cambridge Crystallographic Data Center via [www.ccdc.cam.ac.uk/data\\_request/cif](http://www.ccdc.cam.ac.uk/data_request/cif).
